# Supplementary material for: Halogen-Free Ciamician-Dennstedt Single-Atom Skeletal Editing
Source: Research Square preprint supplement (doi:10.21203/rs.3.rs-4163086/v1), 2024-06-18
Supplement: Supplementary file 1 [file 0f6c3edd538c9f76339d001e.docx]

*Supplementary Information for*

**Halogen-free Ciamician-Dennstedt Single-Atom Skeletal Editing**

Shaopeng Liu,1† Yong Yang,1† Qingmin Song,1† Zhaohong Liu,1* Paramasivam Sivaguru,1 Yifan Zhang,1 Graham de Ruiter,2 Edward A. Anderson3* and Xihe Bi1,4*

1Department of Chemistry, Northeast Normal University; Changchun 130024, China.

2Schulich Faculty of Chemistry, Technion - Israel Institute of Technology, Technion City, 3200008, Haifa, Israel.

3Chemistry Research Laboratory, Department of Chemistry, University of Oxford, 12 Mansfield Road, Oxford OX1 3TA, UK

4State Key Laboratory of Elemento-Organic Chemistry, Nankai University, Tianjin 300071, China.

‡These authors contributed equally to this work.

*Corresponding author. Email: [liuzh944@nenu.edu.cn](mailto:liuzh944@nenu.edu.cn); [edward.anderson@chem.ox.ac.uk](mailto:edward.anderson@chem.ox.ac.uk); [bixh507@nenu.edu.cn](mailto:bixh507@nenu.edu.cn).

| **Table of Contents**   | 1. | **General Information** | S1 | | --- | --- | --- | | 2. | **Detailed Optimization of Conditions** | S2 | | 3. | **Preparation of Starting Materials** | S9 | |  | 3.1 The Preparation of Fluoroalkyl Substituted *N*-Triftosylhydrazones | S9 | |  | 3.2 The Preparation of *N*-Triftosylhydrazones-Derived from Aldehyde | S10 | | 4. | **Experimental Procedures** | S11 | |  | 4.1 General Procedures for One-Carbon Insertion of Indoles with Fluoroalkyl *N*-Triftosylhydrazones | S11 | |  | 4.2 General Procedures for Defluorinative One-Carbon Insertion of Indoles with Fluoroalkyl *N*-triftosylhydrazones | S12 | |  | 4.3 General Procedures for One-Carbon Insertion of Indoles with Functionalized *N*-triftosylhydrazones | S13 | |  | 4.4 General Procedure for One-Carbon Insertion of Pyrroles with *N*-Triftosylhydrazones | S15 | |  | 4.5 Gram-scale Experiment | S16 | |  | 4.6 Total Synthesis of Bioactive Molecules using the One-Carbon Insertion as Key Step | S16 | | 5. | **Mechanistic Considerations** | S27 | |  | 5.1 Controlled Experiment | S27 | |  | 5.2 Computational Details | S43 | | 6. | **Characterization Data of Products** | S45 | | 7. | **References** | S94 | | 8. | **NMR Spectra of Products** | S96 | |  |  |  | |  |  |  | |  |  |  | |
| --- | --- | --- | --- | --- | --- | --- | --- | --- | --- | --- | --- | --- | --- | --- | --- | --- | --- | --- | --- | --- | --- | --- | --- | --- | --- | --- | --- | --- | --- | --- | --- | --- | --- | --- | --- | --- | --- | --- | --- | --- | --- | --- | --- | --- | --- | --- | --- | --- | --- | --- | --- | --- | --- | --- | --- | --- | --- | --- | --- | --- | --- | --- | --- |

**1. General Information**

The products were purified by column chromatography over silica gel (200-300 mesh). NMR spectra were recorded on a Brüker Advance 600 (1H: 600 MHz, 13C: 150 MHz, 19F: 564 MHz) and Brüker Advance 500 (1H: 500 MHz, 13C: 125 MHz, 19F: 470 MHz) at ambient temperature. 1H and 13C NMR spectra were reported as chemical shifts in parts per million (ppm) downfield from tetramethylsilane, using the residual undeuterated solvent (CHCl3 at 7.26 ppm 1H NMR, 77.00 ppm 13C NMR) or tetramethylsilane as reference. 19F NMR spectra were reported as chemical shifts in parts per million (ppm) using CFCl3 (0 ppm) in CDCl3 as reference. Coupling constants were reported in hertz (Hz). The following abbreviations were used to explain the multiplicities: s = singlet, d = doublet, t = triplet, q = quartet, m = multiplet. High-resolution mass spectra (HRMS) were recorded on Bruck microTof by using ESI method. Melting points were determined with XRC-1 and are uncorrected.

All chemicals were purchased from Adamas-Beta, Energy Chemical Company, ALDRICH, and J&K Scientific Ltd, and were used as received from the commercial suppliers without further purification unless mentioned otherwise. All solvents were purified and dried according to standard methods prior to use. Unless otherwise stated, all reactions were carried out in flame-dried glassware under a dry argon atmosphere.

**2. Detailed Optimization of Conditions**

## Table S1. Optimization of cyclopropanation of *N*-TBS indole and TFHZ-Tfs

| **Entry** | **Cat. [M]** (mol%) | **Base** | **Solvent** | **Temp.**(°C) | Yield of **3'** |
| --- | --- | --- | --- | --- | --- |
| 1 | TpBr3Ag(THF) (10) | NaH | PhCF3 | 60 | 12% |
| 2 | TpCF3Ag(THF) (10) | NaH | PhCF3 | 60 | trace |
| **3** | **TpBr3Cu(NCMe) (10)** | **NaH** | **PhCF3** | **60** | **94**% |
| 4 | TpMe2Cu(NCMe) (10) | NaH | PhCF3 | 60 | 27% |
| 5 | [(PCNHCP)Fe(H)2N2)] (5) | NaH | PhCF3 | 60 | N.D. |
| 6 | [((PCNHCP)Fe(N2))2-*µ*-N2)] (5) | NaH | PhCF3 | 60 | N.D. |
| 7 | PCP-Co(II)Cl2 (5) | NaH | PhCF3 | 60 | N.D. |
| 8 | PCP-Co(I)-BArF (5) | NaH | PhCF3 | 60 | N.D. |
| 9 | Rh2(OAc)4 (1) | NaH | PhCF3 | 60 | 13% |
| 10 | Rh2(Oct)4(1) | NaH | PhCF3 | 60 | 45% |
| 11 | TpBr3Cu(NCMe) (10) | Cs2CO3 | PhCF3 | 60 | 61% |
| 12 | TpBr3Cu(NCMe) (10) | DIPEA | PhCF3 | 60 | trace |
| 13 | TpBr3Cu(NCMe) (10) | NaH | DCM | 60 | 79% |
| 14 | TpBr3Cu(NCMe) (10) | NaH | DCE | 60 | 73% |
| 15 | TpBr3Cu(NCMe) (10) | NaH | PhMe | 60 | 62% |
| 16 | TpBr3Cu(NCMe) (10) | NaH | PhCF3 | 40 | 63% |
| 17 | TpBr3Cu(NCMe) (10) | NaH | PhCF3 | 80 | 84% |

Reaction conditions: indole **1** (0.3 mmol), TFHZ-Tfs **2** (0.36 mmol, 1.2 equiv.), Cat. [M] (1-10 mol%), base (0.72 mmol, 2.4 equiv.), solvent (10 mL), under N2 for 12 hours. The yield of cyclopropane **3'** was determined by 1H NMR analysis of the crude reaction mixture using dibromomethane as an internal standard. N.D. means that no product was detected.

## Table S2. Optimization of ring-opening 3' to afford 3-(trifluoromethyl)quinoline 3

| **Entry** | **[F]-source** | **Solvent** | **Additive** | **Temp.**(°C) | Yield of **3** |
| --- | --- | --- | --- | --- | --- |
| 1 | TBAF | THF | - | 25 | 44% |
| 2 | TMAF | THF | - | 25 | N.D. |
| 3 | TEAF | THF | - | 25 | N.D. |
| 4 | TBAF | 1,4-dioxane | - | 25 | 28% |
| 5 | TBAF | MeCN | - | 25 | 15% |
| 6 | TBAF | THF | - | 0 | 52% |
| 7 | TBAF | THF | - | -20 | 66% |
| 8 | TBAF | THF | - | -60 | 71% |
| 9 | TBAF | THF | DDQ | 25 | 92% |

Reaction conditions: crude product **3**, [F]-source (1.2 equiv.), additive (1.2 equiv.), was carried out in 10 mL of solvent for 10 min. Isolated yield. N.D. means that no product was detected.

**The optimal reaction conditions for one-carbon insertion of indole with TFHZ-Tfs**

**Procedure:** To an oven-dried screw-cap reaction tube was charged with *N*-TBS indole **1** (69.3 mg, 0.3 mmol), TFHZ-Tfs **2** (115.3 mg, 0.36 mmol, 1.2 equiv.), NaH (28.8 mg, 0.72 mmol, 2.4 equiv., 60 wt% dispersion in mineral oil), TpBr3Cu(NCMe) (36.0 mg, 10.0 mol%) and PhCF3 (10 mL) inside a glove box with nitrogen atmosphere. After transfer out of the glove box, the reaction was stirred at 60 °C for 12 h. The reaction mixture was filtered through a short pad of silica gel with DCM as an eluent. After removal of the solvent *in* *vacuo*, the residue was added TBAF (0.36 mL, 0.36 mmol, 1.0 mol/L in THF, 1.2 equiv.), DDQ (102.2 mg, 0.45 mmol, 1.5 equiv.) and THF (10 mL). The resulting mixture was stirred at 25 °C for 10 min and filtered through a short pad of silica gel (pre-treated with triethylamine) with DCM as an eluent. After removal of the solvent *in* *vacuo*, the residue was purified by flash column chromatography on silica gel (pre-treated with trimethylamine, using petroleum ether-EtOAc as eluent) to give the product **3**.

## Table S3. Optimization for one-carbon insertion of indole with DFHZ-Tfs

| **Entry** | **Cat. [M]** (mol%) | **Base** | **Solvent** | **Temp.**(°C) | **t (h)** | Yield of **26** |
| --- | --- | --- | --- | --- | --- | --- |
| 1 | TpBr3Cu(NCMe) (10) | NaH | PhCF3 | 60 | 12 | 40% |
| 2 | TpBr3Ag(THF) (10) | NaH | PhCF3 | 60 | 12 | N.D. |
| 3 | [(PCNHCP)Fe(H)2N2)] (5) | NaH | PhCF3 | 60 | 12 | N.D. |
| 4 | [((PCNHCP)Fe(N2))2-*µ*-N2)] (5) | NaH | PhCF3 | 60 | 12 | N.D. |
| 5 | PCP-Co(II)Cl2 (5) | NaH | PhCF3 | 60 | 12 | N.D. |
| 6 | PCP-Co(I)-BArF (5) | NaH | PhCF3 | 60 | 12 | N.D. |
| 7 | Rh2(OAc)4 (1) | NaH | PhCF3 | 60 | 12 | 36% |
| 8 | TpBr3Cu(NCMe) (10) | NaH | PhCF3 | 60 | 12 | trace |
| 9 | TpBr3Cu(NCMe) (10) | DIPEA | PhCF3 | 60 | 12 | 22% |
| 10 | TpBr3Cu(NCMe) (10) | K2CO3 | PhCF3 | 60 | 12 | 37% |
| 11 | TpBr3Cu(NCMe) (10) | Cs2CO3 | PhCF3 | 60 | 12 | 54% |
| 12 | TpBr3Cu(NCMe) (10) | Cs2CO3 | DCM | 60 | 12 | 30% |
| 13 | TpBr3Cu(NCMe) (10) | Cs2CO3 | 1,4-dioxane | 60 | 12 | 44% |
| 14 | TpBr3Cu(NCMe) (10) | Cs2CO3 | PhCF3 | 40 | 12 | 70% |
| 15 | TpBr3Cu(NCMe) (10) | Cs2CO3 | PhCF3 | 60 | 24 | 88% |

Reaction conditions: indole **1** (0.3 mmol), DFHZ-Tfs (0.6 mmol, 2.0 equiv.), Cat. [M] (1-10 mol%), base (1.8 mmol, 6.0 equiv.), solvent (10 mL), under N2 for 12 or 24 hours. Isolated yield. N.D. means that no product was detected.

**The optimal reaction conditions for one-carbon insertion of indole with DFHZ-Tfs**

**Procedure:** To an oven-dried screw-cap reaction tube was charged with DFHZ-Tfs (181.3 mg, 0.6 mmol, 2.0 equiv.), Cs2CO3 (586.5 mg, 1.8 mmol, 6.0 equiv.), *N*-TBS indole **1** (69.3 mg, 0.3 mmol, 1.0 equiv.), TpBr3Cu(NCMe) (36.0 mg, 10.0 mol%) and DCM (10 mL) inside a glove box with nitrogen atmosphere. After transfer out of the glove box, the reaction was stirred at 60 °C for 24 h. The reaction mixture was filtered through a short pad of silica gel with DCM as an eluent. After removal of the solvent *in* *vacuo*, the residue was added TBAF (0.36 mL, 0.36 mmol, 1.0 mol/L in THF, 1.2 equiv.), DDQ (102.2 mg, 0.45 mmol, 1.5 equiv.) and THF (10 mL). The resulting mixture was stirred at 25 °C for 10 min and filtered through a short pad of silica gel (pre-treated with triethylamine) with DCM as an eluent. After removal of the solvent *in* *vacuo*, the residue was purified by flash column chromatography on silica gel (pre-treated with trimethylamine, using petroleum ether-EtOAc as eluent) to give the product **26**.

## Table S4. Optimization for hydrodefluorinative one-carbon insertion of indole with fluoroalkyl *N*-triftosylhydrazone

| **Entry** | **[F]-source** | **Solvent** | **Additive** | **Temp.**(°C) | Yield of **36** | Yield of **37** |
| --- | --- | --- | --- | --- | --- | --- |
| 1 | TBAF | THF | DDQ (1.5 equiv.) | 25 | 60% | 20% |
| 2 | TBAF | THF | - | 25 | 44% | 23% |
| 3 | CsF | DMSO | - | 25 | 37% | 48% |
| 4 | CsF | DMF | - | 25 | 36% | 46% |
| 5 | CsF | DME | - | 25 | 40% | 47% |
| 7 | CsF | DMSO | H2O (20 equiv.) | 25 | n.d. | 98% |

Reaction conditions: (1) indole **1** (0.3 mmol), *N*-triftosylhydrazone (0.6 mmol, 2.0 equiv.), TpBr3Cu(NCMe) (10 mol%), NaH (1.8 mmol, 6.0 equiv.), PhCF3 (10 mL), under N2 for 12 hours. (2) [F]-source (1.2 equiv.), additive, solvent (10 mL), 25 °C, under air for 10 min. Isolated yield.

**The optimal reaction conditions for hydrodefluorinative one-carbon insertion reaction:**

**Procedure：**To an oven-dried screw-cap reaction tube was charged with *N*-TBS indole **1** (69.3 mg, 0.3 mmol), *N*-triftosylhydrazone (222.0 mg, 0.6 mmol, 2.0 equiv.), NaH (72.0 mg, 1.8 mmol, 6.0 equiv., 60 wt% dispersion in mineral oil), TpBr3Cu(NCMe) (36mg, 10.0 mol%) and PhCF3 (10 mL) inside a glove box with nitrogen atmosphere. After transfer out of the glove box, the reaction was stirred at 60 °C for 12 h. The reaction mixture was filtered through a short pad of silica gel with DCM as an eluent. After removal of the solvent *in* *vacuo*, the residue was added CsF (54.7 mg, 0.36 mmol, 1.2 equiv.), H2O (20.0 equiv.) and DMSO (10 mL). The resulting mixture was stirred at 25 °C for 10 min and then was diluted with DCM, washed with brine, dried over anhydrous Na2SO4, filtered and the solvent was evaporated under reduced pressure to leave a crude product, which was purified by flash column chromatography on silica gel (pre-treated with trimethylamine, using petroleum ether-EtOAc as eluent) to give the product **37**.

## Table S5. Optimization for defluorinative formylation insertion of indole with TFHZ-Tfs leading to quinoline-3-carboxaldehyde

| **Entry** | **Solvent** | **Temp.**(°C) | **time** | Yield of **56** |
| --- | --- | --- | --- | --- |
| 1 | DMSO | 25 | 10 min | 15% |
| 2 | DMSO | 0 | 1.0 h | 9% |
| 3 | DMSO | 25 | 5.0 h | 54% |
| 4 | DMSO | 40 | 5.0 h | 78% |
| 5 | DMSO | 60 | 5.0 h | 77% |

Reaction conditions: (1) indole **1** (0.3 mmol), *N*-triftosylhydrazone (0.36 mmol, 1.2 equiv.), TpBr3Cu(NCMe) (10 mol%), NaH (0.72 mmol, 2.4 equiv.), PhCF3 (10 mL), under N2 for 12 hours. (2) CsF (0.36 mmol, 1.2 equiv.), H2O (20.0 equiv.), DMSO (10 mL), 0-60 °C, under air for 10 min-5 h. Isolated yield.

**The optimal reaction conditions for defluorinative formylation one-carbon insertion reaction:**

**Procedure：**To an oven-dried screw-cap reaction tube was charged with *N*-TBS indole **1** (69.3 mg, 0.3 mmol), *N*-triftosylhydrazone (115.3 mg, 0.36 mmol, 1.2 equiv.), NaH (28.8 mg, 0.72 mmol, 2.4 equiv., 60 wt% dispersion in mineral oil), TpBr3Cu(NCMe) (36.0 mg, 10.0 mol%) and PhCF3 (10 mL) inside a glove box with nitrogen atmosphere. After transfer out of the glove box, the reaction was stirred at 60 °C for 12 h. After cooling to room temperature, the reaction mixture was filtered through a short pad of silica gel with DCM as an eluent. After removal of the solvent *in* *vacuo*, the residue was added CsF (54.7 mg, 0.36 mmol, 1.2 equiv.), H2O (20.0 equiv.) and DMSO (10 mL). The resulting mixture was stirred at 40 °C for 5 h. After completion of the reaction, the mixture was diluted with DCM, washed with brine, dried over anhydrous Na2SO4, filtered and the solvent was evaporated under reduced pressure to leave a crude product, which was purified by flash column chromatography on silica gel (pre-treated with trimethylamine, using petroleum ether-EtOAc as eluent) to give product **56**.

## Table S6. Optimization for one-carbon insertion of indole with aryl-substituted *N*-triftosylhydrazone.

| **Entry** | **Cat. [M]** (mol%) | **Base** | **Solvent** | **Temp.**(°C) | **PG** | Yield (%) of **70** |
| --- | --- | --- | --- | --- | --- | --- |
| 1 | TpBr3Cu(NCMe) (10) | NaH | PhCF3 | 60 | TBS | 20 |
| 2 | TpMe2Cu(NCMe) (10) | NaH | PhCF3 | 60 | TBS | 13 |
| 3 | TpBr3Ag(THF) (10) | NaH | PhCF3 | 60 | TBS | 97 |
| 4 | Tp(CF3)2Ag(THF) (10) | NaH | PhCF3 | 60 | TBS | 92 |
| 5 | AgOTf (10) | NaH | PhCF3 | 60 | TBS | 48 |
| 6 | Rh2(esp)2 (1) | NaH | PhCF3 | 60 | TBS | 83 |
| 7 | Pd(OAc)2(5) | NaH | PhCF3 | 60 | TBS | trace |
| 8 | TpBr3Ag(THF) (10) | Cs2CO3 | PhCF3 | 60 | TBS | 77 |
| 9 | TpBr3Ag(THF) (10) | K2CO3 | PhCF3 | 60 | TBS | 64 |
| 10 | TpBr3Ag(THF) (10) | LiO*t*Bu | PhCF3 | 60 | TBS | 72 |
| 11 | TpBr3Ag(THF) (10) | DIPEA | PhCF3 | 60 | TBS | trace |
| 12 | TpBr3Ag(THF) (10) | NaH | DCM | 60 | TBS | 34(32) |
| 13 | TpBr3Ag(THF) (10) | NaH | DCE | 60 | TBS | 36(35) |
| 14 | TpBr3Ag(THF) (10) | NaH | CHCl3 | 60 | TBS | trace |
| 15 | TpBr3Ag(THF) (10) | NaH | PhCF3 | 40 | TBS | 57 |
| 16 | TpBr3Ag(THF) (10) | NaH | PhCF3 | 80 | TBS | 94 |
| 17 | TpBr3Ag(THF) (10) | NaH | PhCF3 | 60 | H | 43 |
| 18 | TpBr3Ag(THF) (10) | NaH | PhCF3 | 60 | TMS | 82 |
| 19 | TpBr3Ag(THF) (10) | NaH | PhCF3 | 60 | TIPS | 95 |
| 20 | TpBr3Ag(THF) (10) | NaH | PhCF3 | 60 | Boc | 0(90) |

Reaction conditions: (1) *N*-triftosylhydrazone (0.3 mmol, 1.0 equiv.), indole (0.6 mmol, 2.0 equiv.), Cat. [M] (1-10 mol%), base (0.6mmol, 2.0 equiv.) and solvent (5 mL), under N2 for 12 hours. (2) TBAF (0.75 mmol, 2.5 equiv.), 25 °C, under air for 10 min. Isolated yield. Isolated yield. Yield in parentheses is unconverted cyclopropane.

**Procedure：**To an oven-dried screw-cap reaction tube was charged with *N*-triftosylhydrazone (102.6 mg, 0.3 mmol, 1.0 equiv.), base (0.6 mmol, 2.0 equiv.), *N*-protected indole (0.6 mmol, 2.0 equiv.), catalyst and solvent (5 mL) inside a glove box with nitrogen atmosphere. After transfer out of the glove box, the reaction was stirred at indicated temperature for 12 h. The reaction mixture was cooled to room temperature. Then, TBAF (0.75 mL, 0.75 mmol, 1.0 mol/L in THF, 2.5 equiv.) was added and stirred at 25 °C under air for 10 min. After completion of the reaction, the mixture was filtered through a short pad of silica gel (pre-treated with triethylamine) with DCM as an eluent. After removal of the solvent *in vacuo*, the residue was purified by flash chromatography on silica gel (pre-treated with trimethylamine, using petroleum ether-EtOAc.

## Table S7. Optimization for one-carbon insertion of pyrrole with *N*-triftosylhydrazone

| **Entry** | **R** | **Cat. [M]** (mol%) | **Base** | **Solvent** | **Temp.**(°C) | Yield of **119** |
| --- | --- | --- | --- | --- | --- | --- |
| 1 | TBS | TpBr3Ag(THF) (10) | NaH | PhCF3 | 60 | trace |
| 2 | H | TpBr3Ag(THF) (10) | NaH | PhCF3 | 60 | 11% |
| 3 | H | TpCF3Ag(THF) (10 | NaH | PhCF3 | 60 | 10% |
| 4 | H | TpBr3Cu(CNMe) (10) | NaH | PhCF3 | 60 | N.D. |
| 5 | H | TpMe2Cu(CNMe) (10) | NaH | PhCF3 | 60 | N.D. |
| 6 | H | [(PCNHCP)Fe(H)2N2)] (5) | NaH | PhCF3 | 60 | N.D. |
| 7 | H | PCP-Co(II)Cl2 (5) | NaH | PhCF3 | 60 | N.D. |
| 8 | H | Rh2(OAc)4 (1) | NaH | PhCF3 | 60 | 41% |
| 9 | H | Rh2(esp)2(1) | NaH | PhCF3 | 60 | 48% |
| 10 | H | Rh2(esp)2(1) | Cs2CO3 | PhCF3 | 60 | 18% |
| 11 | H | Rh2(esp)2(1) | K2CO3 | PhCF3 | 60 | 15% |
| 12 | H | Rh2(esp)2(1) | LiO*t*Bu | PhCF3 | 60 | 22% |
| 13 | H | Rh2(esp)2(1) | NaH | DCM | 60 | 40% |
| 14 | H | Rh2(esp)2(1) | NaH | DCE | 60 | 23% |
| 15 | H | Rh2(esp)2(1) | NaH | PhCF3 | 40 | 32% |
| 16 | H | Rh2(esp)2(1) | NaH | PhCF3 | 80 | 46% |

Reaction conditions: *N*-triftosylhydrazone (0.3 mmol, 1.0 equiv.), pyrrole (0.6 mmol, 2.0 equiv.), Cat. [M] (1-10 mol%), base (0.6mmol, 2.0 equiv.) and solvent (5 mL), under N2 for 12 hours. Isolated yield. N.D. means that no product was detected.

**Procedure:** To an oven-dried screw-cap reaction tube was charged with *N*-triftosylhydrazone (98.4 mg, 0.3 mmol, 1.0 equiv.), base (0.6 mmol, equiv.), pyrrole (0.6 mmol, 2.0 equiv.) catlyst and 5 mL solvent inside a glove box with nitrogen atmosphere. After transfer out of the glove box, the reaction was stirred at the required temperature for 12 h. The mixture was filtered through a short pad of silica gel (pre-treated with triethylamine) with DCM as an eluent. After removal of the solvent *in vacuo*, the residue was purified by flash chromatography on silica gel (pre-treated with trimethylamine, using petroleum ether-EtOAc as eluent) to give the product **119**.

**3. Preparation of Starting Materials**

## 3.1 The Preparation of Fluoroalkyl Substituted *N*-Triftosylhydrazones

**Procedure**: TFHZ-Tfs was prepared according to literature procedure[1]. A 500 mL bottom flask was charged with trifluoroacetaldehyde monohydrate (14.9 g, 127.5 mmol), H2NNHTfs (20.4 g, 85.0 mmol) and EtOAc (310.0 mL). Then AcOH (4.3 mL, 7.7 mmol) was added dropwise and stirred at ice water bath for 10 min under nitrogen. Then the mixture was transferred to room temperature and stirred for 80 min. After that, the mixture was transferred to 40 °C and stirred overnight. After the reaction was completion, the mixture was concentrated under reduced pressure and washed by PE/EtOAc to afford TFHZ-Tfs as a white solid, 90% yield, m.p: 124-125 °C; **1H NMR** (500 MHz, DMSO-*d*6) δ 13.01 (s, 1H), 8.07 (d, *J* = 8.0 Hz, 1H), 7.90 (d, *J* = 8.0 Hz, 1H), 7.88 (t, *J* = 8.0 Hz, 1H), 7.81 (t, *J* = 8.0 Hz, 1H), 7.52 (q, *J* = 8.0 Hz, 1H). **13C NMR** (150 MHz, DMSO-*d*6) δ 137.5, 134.6, 133.5 (q, *J* = 37.6 Hz), 133.5 (q, *J* = 37.9 Hz), 132.1, 129.1 (q, *J* = 6.3 Hz), 127.0 (q, *J* = 33.0 Hz), 123.1 (q, *J* = 272.4 Hz), 120.4 (q, *J* = 271.5 Hz). **19F NMR** (564 MHz, DMSO-*d*6) δ -51.95, -61.95 (d, *J* = 3.8 Hz). **HRMS** (ESI) m/z calculated for C9H6F6N2NaO2S+ [M+Na]+ 342.9946, found 342.9955. The spectrum was consistent with the previous literature [1].

**Procedure**: Fluoroalkyl *N*-triftosylhydrazones were prepared according to literature procedure[2]. A 250 mL bottom flask was charged with ethyl perfluorate (75.0 mmol) and EtOAc (200.0 mL). The LiAlH4 (1.1 equiv.) was added into the reaction mixture dropwise at -30 °C under N2 atmosphere. The reaction mixture were continued stired for 12 h at -30 °C. Then H2NNHTfs (50.0 mmol) and AcOH (5.5 mmol) was added dropwise under N2 atmosphere. The mixture was transferred to 40 ºC and stirred for 4-5 h, and monitored by TLC. After the reaction was complete, the mixture was concentrated under reduced pressure and washed by Pe/ PE/EtOAc to afford the desired *N*-triftosylhydrazones. DFHZ-Tfs: white solid. m.p: 86-87 ºC. **1H NMR** (500 MHz, CDCl3) δ 9.07 (s, 1H), 8.35-8.30 (m, 1H), 7.93-7.90 (m, 1H), 7.82-7.77 (m, 2H), 7.22-7.19 (m, 1H), 5.99 (td, *J* = 54.5, 6.0 Hz, 1H). **13C NMR** (125 MHz, CDCl3) δ 139.7 (t, *J* = 33.5 Hz), 136.1, 134.1, 133.1, 132.8, 128.6 (q, *J* = 6.5 Hz), 127.8 (q, *J* = 33.0 Hz), 122.6 (q, *J* = 272.5 Hz), 112.2 (t, *J* = 234.5 Hz). **19F NMR** (470 MHz, CDCl3) δ -58.30, -117.13 (d, *J* = 54.5 Hz). HRMS (ESI) m/z calcd. for C9H7F5N2NaO2S [M+Na]+ 325.0041, found 325.0047.

## 3.2 The Preparation of *N*-Triftosylhydrazone-Derived from Aldehyde

**General Procedure**: The *N*-triftosylhydrazone-derived from aldehyde was prepared according to the literature procedure[3]. To a stirred solution of H2NNHTfs (2.0 mmol) of methanol (2 mL), aldehyde (2.2 mmol, 1.1 equiv.) was added dropwise. The resulting the mixture was stirred at room temperature for 1-5 h. The mixture was filtered and the resulting solid was washed with ice cold diethyl ether and dried under reduced pressure to give the corresponding pure *N*-triftosylhydrazones.

**Procedure** : The alkynyl *N*-triftosylhydrazone was prepared according to literature procedure[4]. To a rapidly stirred suspension of H2NNHTfs (2.0 mmol, 1.0 equiv.) and La(OTf)3 (2.0 mol %) in MeOH (10 mL), 3-(triisopropylsilyl)propiolaldehyde (2.2 mmol, 1.1 equiv.) was added dropwise. The resulting the mixture was stirred at 0 °C for 2 h (monitored by TLC) and the crude products are obtained as solid precipitates. Then the crude products were purified by flash chromatography on silica gel to afford the desired alkynyl *N*-triftosylhydrazones.

**4. Experimental Procedures**

## 4.1 General Procedures for One-Carbon Insertion of Indoles with Fluoroalkyl *N*-Triftosylhydrazones

**General Procedure A:** In a glove box, an oven-dried screw-cap reaction tube was charged with *N*-triftosylhydrazone (0.36 mmol, 1.2 equiv.), NaH (0.72 mmol, 2.4 equiv., 60 wt% dispersion in mineral oil), *N*-TBS indole (0.3 mmol, 1.0 equiv.), TpBr3Cu(NCMe) (36.0 mg, 10 mol%) and PhCF3 (10 mL). Next, the sealed vial was removed from glovebox and stirred at 60 °C for 12 h. After cooling to room temperature, the reaction mixture was filtered through a short pad of silica gel with DCM as an eluent. After removal of the solvent *in* *vacuo*, the residue was added TBAF (0.36 mL, 0.36 mmol, 1.0 mol/L in THF, 1.2 equiv.) and DDQ (0.45 mmol, 1.5 equiv.) and THF (10 mL). The resulting mixture was stirred at 25 °C for 10 min and filtered through a short pad of silica gel (pre-treated with triethylamine) with DCM as an eluent. After removal of the solvent *in* *vacuo*, the residue was purified by flash column chromatography on silica gel (pre-treated with trimethylamine, using petroleum ether-EtOAc as eluent) to afford the products **3–25** and **34**.

**General Procedure B:** In a glove box, anoven-dried screw-cap reaction tube was charged with *N*-triftosylhydrazones (0.6 mmol, 2.0 equiv.), Cs2CO3 (1.8 mmol, 6.0 equiv.), *N*-TBS indole (0.3 mmol, 1.0 equiv.), TpBr3Cu(NCMe) (36.0 mg, 10 mol%) and DCM (10 mL). Next, the sealed vial was removed from glovebox and stirred at 60 °C for 12 h. After cooling to room temperature, the reaction mixture was filtered through a short pad of silica gel with DCM as an eluent. After removal of the solvent *in* *vacuo*, the residue was added TBAF (0.36 mL, 0.36 mmol, 1.0 mol/L in THF, 1.2 equiv.), DDQ (0.45 mmol, 1.5 equiv.) and THF (10 mL). The resulting mixture was stirred at 25 °C for 10 min and filtered through a short pad of silica gel (pre-treated with triethylamine) with DCM as an eluent. After removal of the solvent *in* *vacuo*, the residue was purified by flash column chromatography on silica gel (pre-treated with trimethylamine, using petroleum ether-EtOAc as eluent) to give the products **26–33** and **35**.

**General Procedure C:** In a glove box, an oven-dried screw-cap reaction tube was charged with*N*-triftosylhydrazone (0.6 mmol, 2.0 equiv.), NaH (1.8 mmol, 6.0 equiv., 60 wt% dispersion in mineral oil), *N*-TBS indole (0.3 mmol, 1.0 equiv.), TpBr3Cu(NCMe) (36.0 mg, 10 mol%) and PhCF3 (10 mL). Next, the sealed vial was removed from glovebox and stirred at 60 °C for 12 h. After cooling to room temperature, the reaction mixture was filtered through a short pad of silica gel with DCM as an eluent. After removal of the solvent *in* *vacuo*, the residue was addeded TBAF (0.36 mL, 0.36 mmol, 1.0 mol/L in THF, 1.2 equiv.), DDQ (0.45 mmol, 1.5 equiv.) and THF (10 mL). The resulting mixture was stirred at 25 °C for 10 min and filtered through a short pad of silica gel (pre-treated with triethylamine) with DCM as an eluent. After removal of the solvent *in* *vacuo*, the residue was purified by flash column chromatography on silica gel (pre-treated with trimethylamine, using petroleum ether-EtOAc as eluent) to give the product **36** (44.5 mg, 60% yield).

## 4.2 General Procedures for Defluorinative One-Carbon Insertion of Indoles with Fluoroalkyl *N*-triftosylhydrazones

**General Procedure D:** In a glove box, an oven-dried screw-cap reaction tube was charged with*N*-triftosylhydrazone (0.6 mmol, 2.0 equiv.), NaH (1.8 mmol, 6.0 equiv., 60 wt% dispersion in mineral oil), *N*-TBS indole (0.3 mmol, 1.0 equiv.), TpBr3Cu(NCMe) (36.0 mg, 10.0 mol%) and PhCF3 (10 mL). Next, the sealed vial was removed from glovebox and stirred at 60 °C for 12 h. After cooling to room temperature, the reaction mixture was filtered through a short pad of silica gel with DCM as an eluent. After removal of the solvent *in* *vacuo*, the residue was added CsF (0.36 mmol, 1.2 equiv.), H2O (20.0 equiv.) and DMSO (10 mL). The resulting mixture was stirred at 25 °C for 10 min and diluted with DCM, washed with brine, dried over anhydrous Na2SO4, filtered and the solvent was evaporated under reduced pressure to leave a crude product, which was purified by flash column chromatography on silica gel (pre-treated with trimethylamine, using petroleum ether-EtOAc as eluent) to give the products **37–55**.

**General Procedure E:** In a glove box, an oven-dried screw-cap reaction tube was charged with*N*-triftosylhydrazone (0.36 mmol, 1.2 equiv.), NaH (0.72 mmol, 2.4 equiv., 60 wt% dispersion in mineral oil), *N*-TBS indoles (0.3 mmol, 1.0 equiv.), TpBr3Cu(NCMe) (36.0 mg, 10 mol%) and PhCF3 (10 mL). Next, the sealed vial was removed from glovebox and stirred at 60 °C for 12 h. After cooling to room temperature, the reaction mixture was filtered through a short pad of silica gel with DCM as an eluent. After removal of the solvent *in* *vacuo*, the residue was added CsF (0.36 mmol, 1.2 equiv.), H2O (20.0 equiv.) and DMSO (10 mL). The resulting mixture was stirred at 25 °C for 10 min and diluted with DCM, washed with brine, dried over anhydrous Na2SO4, filtered and the solvent was evaporated under reduced pressure to leave a crude product, which was purified by flash column chromatography on silica gel (pre-treated with trimethylamine, using petroleum ether-EtOAc as eluent) to give the 3-formylquinoline products **56****–69**.

## 4.3 General Procedures for One-Carbon Insertion of Indoles with Functionalized *N*-triftosylhydrazones

**General Procedure F:** In a glove box, an oven-dried screw-cap reaction tube was charged with *N*-triftosylhydrazone (0.3 mmol, 1.0 equiv.), NaH (0.6 mmol, 2.0 equiv., 60 wt% dispersion in mineral oil), *N*-TBS indole (0.6 mmol, 2.0 equiv.), TpBr3Ag(THF) (36.0 mg, 10 mol%) and PhCF3 (5.0 mL). Next, the sealed vial was removed from glovebox and stirred at 60 °C for 12 h. After cooling to room temperature, the reaction mixture was added TBAF (0.75 mL, 0.75 mmol, 1.0 mol/L in THF, 2.5 equiv.) and stired at 25 °C for 10 min. After completion of the reaction, the mixture was filtered through a short pad of silica gel (pre-treated with triethylamine) with DCM as an eluent. After removal of the solvent *in vacuo*, the residue was purified by flash chromatography on silica gel (pre-treated with trimethylamine, using petroleum ether-EtOAc as eluent) to give the corresponding 3-arylquinoline products.

**General Procedure G:** In a glove box, an oven-dried screw-cap reaction tube was charged with *N*-triftosylhydrazone (0.3 mmol, 1.0 equiv.), NaH (0.6 mmol, 2.0 equiv., 60 wt% dispersion in mineral oil), *N*-TBS indole (0.6 mmol, 2.0 equiv.), TpBr3Ag(THF) (36.0 mg, 10 mol%) and PhCF3 (5.0 mL). Next, the sealed vial was removed from glovebox and stirred at 60 °C for 12 h. After cooling to room temperature, the reaction mixture was added TBAF (0.75 mL, 0.75 mmol, 1.0 mol/L in THF, 2.5 equiv.) and stired at 25 °C for 10 min. After completion of the reaction, the mixture was filtered through a short pad of silica gel (pre-treated with triethylamine) with DCM as an eluent. After removal of the solvent *in vacuo*, the residue was purified by flash chromatography on silica gel (pre-treated with trimethylamine, using petroleum ether-EtOAc as eluent) to give products **72**, **84** and **107**.

**General Procedure H:** In a glove box, an oven-dried screw-cap reaction tube was charged with*N*-triftosylhydrazones (0.3 mmol, 1.0 equiv.), NaH (0.6 mmol, 2.0 equiv., 60 wt% dispersion in mineral oil), *N*-TBS indole (0.6 mmol, 2.0 equiv.), TpBr3Ag(THF) (36.0 mg, 10 mol%) and PhCF3 (5.0 mL). Next, the sealed vial was removed from glovebox and stirred at 60 °C for 12 h. After cooling to room temperature, the reaction mixture was filtered through a short pad of silica gel (pre-treated with triethylamine) with DCM as an eluent. After removal of the solvent *in* *vacuo*, the residue was added CsF (0.36 mmol, 2.5 equiv.) and DMSO (3.0 mL). The resulting mixture was stirred at 25 °C for 10 min and diluted with DCM, washed with brine, dried over anhydrous Na2SO4, filtered and the solvent was evaporated under reduced pressure to leave a crude product, which was purified by flash column chromatography on silica gel (pre-treated with trimethylamine, using petroleum ether-EtOAc as eluent) to give the products **75**, **91**, **98** and **115**.

**General Procedure I:** In a glove box, an oven-dried screw-cap reaction tube was charged with *N*-triftosylhydrazone (0.3 mmol, 1.0 equiv.), NaH (0.6 mmol, 2.0 equiv., 60 wt% dispersion in mineral oil), *N*-TBS indole (0.6 mmol, 2.0 equiv.), TpBr3Ag(THF) (36.0 mg, 10 mol%) and DCM (5.0 mL). Next, the sealed vial was removed from glovebox and stirred at 60 °C for 12 h. After cooling to room temperature, the reaction mixture was filtered through a short pad of silica gel (pre-treated with triethylamine) with DCM as an eluent. After removal of the solvent *in* *vacuo*, the residue was added TBAF (0.75 mL, 0.75 mmol, 1.0 mol/L in THF, 2.5 equiv.) and THF (5.0 mL). The resulting mixture was stirred at 25 °C for 10 min and filtered through a short pad of silica gel (pre-treated with triethylamine) with DCM as an eluent. After removal of the solvent *in vacuo*, the residue was purified by flash chromatography on silica gel (pre-treated with trimethylamine, using petroleum ether-EtOAc as eluent) to give product **86** (21.6 mg, 35% yield).

**General Procedure J:** In a glove box, an oven-dried screw-cap reaction tube was charged with *N*-triftosylhydrazone (0.3 mmol, 1.0 equiv.), NaH (0.6 mmol, 2.0 equiv., 60 wt% dispersion in mineral oil), *N*-TBS indole (0.6 mmol, 2.0 equiv.), Rh2(esp)2 (1.0 mol%) and DCM (5.0 mL). Next, the sealed vial was removed from glovebox and stirred at 60 °C for 12 h. After cooling to room temperature, the reaction mixture was filtered through a short pad of silica gel with DCM as an eluent. After removal of the solvent *in* *vacuo*, the residue was added CsF (0.36 mmol, 2.5 equiv.) and DMF (3.0 mL). The resulting mixture was stirred at 25 °C for 2 h and diluted with DCM, washed with brine, dried over anhydrous Na2SO4, filtered and the solvent was evaporated under reduced pressure to leave a crude product, which was purified by flash column chromatography on silica gel (pre-treated with trimethylamine, using petroleum ether-EtOAc as eluent) to give the products **87–90**.

**General Procedure K:** In a glove box, an oven-dried screw-cap reaction tube was charged with *N*-triftosylhydrazone (0.3 mmol, 1.0 equiv.), NaH (0.6 mmol, 2.0 equiv., 60 wt% dispersion in mineral oil), *N*-TBS indole (0.6 mmol, 2.0 equiv.), Rh2(esp)2 (1.0 mol%) and PhCF3 (5.0 mL). Next, the sealed vial was removed from glovebox and stirred at 60 °C for 12 h. After cooling to room temperature, the reaction mixture was added TBAF (0.75 mL, 0.75 mmol, 1.0 mol/L in THF, 2.5 equiv.) and stirred at 25 °C for 10 min. After completion of the reaction, the mixture was filtered through a short pad of silica gel (pre-treated with triethylamine) with DCM as an eluent. After removal of the solvent *in vacuo*, the residue was purified by flash chromatography on silica gel (pre-treated with trimethylamine, using petroleum ether-EtOAc as eluent) to give the product **92** (28.0 mg, 40% yield).

**Procedure L:** In a glove box, an oven-dried screw-cap reaction tube was charged with*N*-triftosylhydrazone (0.3 mmol, 1.0 equiv.), NaH (0.6 mmol, 2.0 equiv., 60 wt% dispersion in mineral oil), *N*-TBS indole (0.6 mmol, 2.0 equiv.), TpBr3Ag(THF) (36.0 mg, 10 mol%) and PhCF3 (5.0 mL). Next, the sealed vial was removed from glovebox and stirred at 80 °C for 12 h. After cooling to room temperature, the reaction mixture was filtered through a short pad of silica gel with DCM as an eluent. After removal of the solvent *in* *vacuo*, the residue was added CsF (0.36 mmol, 2.5 equiv.) and DMSO (3.0 mL). The resulting mixture was stirred at 25 °C for 10 min. After completion of the reaction, the mixture was diluted with DCM, washed with brine, dried over anhydrous Na2SO4, filtered and the solvent was evaporated under reduced pressure to leave a crude product, which was purified by flash column chromatography on silica gel (pre-treated with trimethylamine, using petroleum ether-EtOAc as eluent) to give the product **108** (74.5 mg, 93%).

## 4.4 General Procedure for One-Carbon Insertion of Pyrroles with *N*-Triftosylhydrazones

**General Procedure M:** In a glove box, an oven-dried screw-cap reaction tube was charged with *N*-triftosylhydrazones (0.3 mmol, 1.0 equiv.), NaH (0.6 mmol, 2.0 equiv., 60 wt% dispersion in mineral oil), pyrroles (0.6 mmol, 2.0 equiv.), Rh2(esp)2 (1.0 mol%) and PhCF3 (5.0 mL). Next, the sealed vial was removed from glovebox and stirred at 60 °C for 12 h. After cooling to room temperature, the reaction mixture was filtered through a short pad of silica gel (pre-treated with triethylamine) with DCM as an eluent. After removal of the solvent *in vacuo*, the residue was purified by flash chromatography on silica gel (pre-treated with trimethylamine, using petroleum ether-EtOAc as eluent) to give the pyridine products **119–128**.

## 4.5 Gram-scale Experiment

**Procedure:** In a glove box, an oven-dried250 mL Schlenk tube containing a stir bar was charged with *N*-triftosylhydrazone (1.71g, 5.0 mmol, 1.0 equiv.), NaH (0.4 g, 2.0 equiv., 60 wt% dispersion in mineral oil), and PhCF3 (50.0 mL). The reaction mixture was stirred at ambient temperature for 30 min, and then *N*-TBS indole (1.73 g, 7.5 mmol, 1.5 equiv.) and TpBr3Ag(THF) (0.6 g, 10.0 mol%) were added into the reaction mixture. Next, the sealed vial was removed from glovebox and stirred at 60 °C for 24 h. After cooling to room temperature, the reaction mixture was added TBAF (15.0 mL, 15.0 mmol, 1.0 mol/L in THF, 2.0 equiv.) and stirred at 25 °C for 10 min. The reaction mixture was filtered through a short pad of silica gel (pre-treated with triethylamine) with DCM as an eluent. After removal of the solvent *in vacuo*, the residue was purified by flash chromatography on silica gel (pre-treated with trimethylamine, using petroleum ether-EtOAc as eluent) to give the product **70** (1.02 g, 89% yield).

## 4.6 Total Synthesis of Bioactive Molecules using the One-Carbon Insertion as Key Step

### Synthesis of compound 130

**Procedure:** In a glove box, an oven-driedtube was charged with *N*-triftosylhydrazone (137.4 mg, 0.3 mmol, 1.0 equiv.), NaH (24 mg, 0.6 mmol, 2.0 equiv., 60 wt% dispersion in mineral oil), 6-OTBS-*N*-TBS indole (216.6 mg, 0.6 mmol, 2.0 equiv.), TpBr3Ag(THF) (36.0 mg, 10.0 mol%) and PhCF3 (5.0 mL). Next, the sealed vial was removed from glovebox and stirred at 60 °C for 24 h. After cooling to room temperature, the reaction mixture was filtered through a short pad of silica gel with DCM as an eluent. After removal of the solvent *in* *vacuo*, the residue was added CsF (304 mg, 2.0 mmol, 6.6 equiv.) and DMSO (3.0 mL). The resulting mixture was stirred at 25 °C for 10 min. After completion of the reaction, the mixture was diluted with DCM, washed with brine, dried over anhydrous Na2SO4, filtered and the solvent was evaporated under reduced pressure to leave a crude product, which was purified by flash column chromatography on silica gel (pre-treated with trimethylamine, using petroleum ether-EtOAc as eluent) to give the product **130** (54.7 mg, 77% yield), as a pale yellow solid solid; mp: 214-215 °C. **1H NMR** (500 MHz, DMSO-*d*6) δ 10.12 (s, 1H), 9.62 (s, 1H), 9.02 (d, *J* = 2.0 Hz, 1H), 8.35 (d, *J* = 2.0 Hz, 1H), 7.84 (d, *J* = 9.0 Hz, 1H), 7.64 (d, *J* = 8.5 Hz, 2H), 7.25 (d, *J* = 2.0 Hz, 1H), 7.17 (dd, *J* = 9.0, 2.5 Hz, 1H), 6.91 (d, *J* = 8.5 Hz, 2H). **13C NMR** (150 MHz, DMSO-*d*6) δ 157.8, 149.0, 148.6, 147.7, 130.6, 130.2, 129.2, 127.3, 124.4, 122.2, 119.4, 114.4, 109.8. **HRMS** (ESI) m/z calcd. for C15H12NO2+ [M + H]+ 238.0863, found 238.0875. The spectrum was consistent with the previous literature[5].

### Synthesis of compound 131

**Procedure:** In a glove box, an oven-driedtube was charged with *N*-triftosylhydrazone (116.4 mg, 0.3 mmol, 1.0 equiv.), NaH (24 mg, 0.6 mmol, 2.0 equiv., 60 wt% dispersion in mineral oil), 6-OTBS-*N*-TBS indole (216.6 mg, 0.6 mmol, 2.0 equiv.), TpBr3Ag(THF) (36.0 mg, 10 mol%) and PhCF3 (5.0 mL). Next, the sealed vial was removed from glovebox and stirred at 60 °C for 12 h. After cooling to room temperature, the reaction mixture was filtered through a short pad of silica gel with DCM as an eluent. After removal of the solvent *in* *vacuo*, the residue was added CsF (228 mg, 1.5 mmol, 5.0 equiv.) and DMSO (3.0 mL). The resulting mixture was stirred at 25 °C for 10 min. After completion of the reaction, the mixture was diluted with DCM, washed with brine, dried over anhydrous Na2SO4, filtered and the solvent was evaporated under reduced pressure to leave a crude product, which was purified by flash column chromatography on silica gel (pre-treated with trimethylamine, using petroleum ether-EtOAc as eluent) to give the product **131** (44.7 mg, 53% yield), as a pale solid solid; mp: 210-211 °C. **1H NMR** (500 MHz, DMSO-*d*6) δ 10.13 (s, 1H), 8.82 (d, *J* = 2.0 Hz, 1H), 8.19 (d, *J* = 1.6 Hz, 1H), 7.82 (d, *J* = 9.0 Hz, 1H), 7.36 (d, *J* = 8.5 Hz, 1H), 7.24 (d, *J* = 2.0 Hz, 1H), 7.16 (dd, *J* = 9.0, 2.0 Hz, 1H), 6.72 (d, *J* = 2.5 Hz, 1H), 6.67 (dd, *J* = 8.5, 2.0 Hz, 1H), 3.83 (s, 3H), 3.80 (s, 3H). **13C NMR** (150 MHz, DMSO-*d*6) δ 160.6, 158.3, 157.5, 151.6, 147.9, 134.5, 131.2, 129.5, 128.4, 122.0, 119.5, 119.3, 109.8, 105.7, 99.1, 55.8, 55.5. **HRMS** (ESI) m/z calcd. for C17H16NO3+ [M + H]+ 282.1125, found 282.1117. The spectrum was consistent with the previous literature[5].

### Synthesis of compound 133

**Step 1:** In a glove box, an oven-driedtube was charged with *N*-triftosylhydrazone (328 mg, 1.0 mmol, 1.0 equiv.), NaH (80.0 mg, 2.0 mmol, 2.0 equiv., 60 wt% dispersion in mineral oil), 5-bromo-1-(*tert*-butyldimethylsilyl)-6-fluoro-1*H*-indole (654.0 mg, 2.0 mmol, 2.0 equiv.), TpBr3Ag(THF) (120.0 mg, 10.0 mol%) and PhCF3 (10.0 mL). Next, the sealed vial was removed from glovebox and stirred at 60 °C for 12 h. After cooling to room temperature, the reaction mixture was added TBAF (2.5 mL, 2.5 mmol, 1.0 mol/L in THF, 2.5 equiv.) and stirred at 25 °C for 10 min. After completion of the reaction, the mixture was filtered through a short pad of silica gel (pre-treated with triethylamine) with DCM as an eluent. After removal of the solvent *in vacuo*, the residue was purified by flash chromatography on silica gel (pre- treated with trimethylamine, using petroleum ether-EtOAc as eluent) to give the product **133'** (264.9 mg, 88% yield), as a white solid; mp: 164-166 °C. **1H NMR** (600 MHz, CDCl3) δ 9.19 (d, *J* = 2.4 Hz, 1H), 8.22 (d, *J* = 2.4 Hz, 1H), 8.14 (d, *J* = 7.2 Hz, 1H), 7.84 (d, *J* = 9.6 Hz, 1H), 7.71-7.67 (m, 2H), 7.54 (t, *J* = 7.8 Hz, 2H), 7.48-7.44 (m, 1H). **13C NMR** (125 MHz, CDCl3) δ 158.7 (d, *J* = 250.0 Hz), 151.2, 147.0 (d, *J* = 11.2 Hz), 137.1, 134.1 (d, *J* = 2.5 Hz), 132.3, 131.9, 129.3, 128.4, 127.3, 125.9, 114.1 (d, *J* = 21.3 Hz), 110.9 (d, *J* = 25.0 Hz). **19F NMR** (470 MHz, CDCl3) δ -104.30 (t, *J* = 8.5 Hz). **HRMS** (ESI) m/z calcd. for C15H10BrFN+ [M + H]+ 301.9975, found 301.9962.

**Step 2:** [6] Compound **133****'** (90.3 mg, 0.3 mmol, 1.0 equiv.) and morpholine (31.4 mg, 0.36 mmol, 1.2 equiv.) were added to a mixture of Pd(OAc)2 (3.4 mg, 5 mol%), BINAP (18.7 mg, 10 mol%), and KO*t*Bu (40.4 mg, 0.36 mmol, 1.2 equiv.) in toluene (3 mL). The reaction mixture was reflux for 24 h. After completion of the reaction, the mixture was diluted with DCM, washed with brine, dried over anhydrous Na2SO4, filtered and the solvent was evaporated under reduced pressure to leave a crude product, which was purified by flash column chromatography on silica gel (pre-treated with trimethylamine, using petroleum ether-EtOAc as eluent) to give the product **133** (73.9 mg, 80% yield), as a pale yellow oil. **1H NMR** (500 MHz, CDCl3) δ 9.02 (d, *J* = 2.0 Hz, 1H), 8.17 (d, *J* = 1.5 Hz, 1H), 7.72 (d, *J* = 13.5 Hz, 1H), 7.67 (d, *J* = 7.5 Hz, 2H), 7.51 (t, *J* = 7.5 Hz, 2H), 7.43 (t, *J* = 7.5 Hz, 1H), 7.21 (d, *J* = 9.0 Hz, 1H), 3.97-3.91 (m, 4H), 3.24-3.19 (m, 4H). **13C NMR** (150 MHz, CDCl3) δ 157.6 (d, *J* = 252.0 Hz), 148.5, 144.1 (d, *J* = 13.5 Hz), 141.3 (d, *J* = 10.0 Hz), 137.8, 133.5 (d, *J* = 1.5 Hz), 131.9, 129.1, 128.0, 127.3, 125.7, 114.2 (d, *J* = 4.5 Hz), 114.0 (d, *J* = 21.0 Hz), 66.8, 51.0 (d, *J* = 4.5 Hz). **19F NMR** (564 MHz, CDCl3) δ -117.46 (dd, *J* = 13.5, 9.0 Hz). **HRMS** (ESI) m/z calcd. for C19H18FN2O+ [M + H]+ 309.1398, found 309.1409. The spectrum was consistent with the previous literature[7].

### Synthesis of compound 134

**Step 1:** In a glove box, an oven-driedtube was charged with *N*-triftosylhydrazone (386.0 mg, 1.0 mmol, 1.0 equiv.), NaH (80 mg, 2.0 mmol, 2.0 equiv., 60 wt% dispersion in mineral oil), *N*-TBS indole (462.0 mg, 2.0 mmol, 2.0 equiv.), TpBr3Ag(THF) (120.0 mg, 10.0 mol%) and PhCF3 (10.0 mL). Next, the sealed vial was removed from glovebox and stirred at 60 °C for 12 h. After cooling to room temperature, the reaction mixture was added TBAF (2.5 mL, 2.5 mmol, 1.0 mol/L in THF, 2.5 equiv.) and stirred at 25 °C for 10 min. After completion of the reaction, the mixture was filtered through a short pad of silica gel (pre-treated with triethylamine) with DCM as an eluent. After removal of the solvent *in vacuo*, the residue was purified by flash chromatography on silica gel (pre- treated with trimethylamine, using petroleum ether-EtOAc as eluent) to give the product **134'** (234.1 mg, 88% yield), as a white solid; mp: 72-74 °C. **1H NMR** (500 MHz, CDCl3) δ 9.16 (d, *J* = 2.0 Hz, 1H), 8.22 (d, *J* = 2.0 Hz, 1H), 8.12 (d, *J* = 8.0 Hz, 1H), 7.84 (d, *J* = 8.0 Hz, 1H), 7.71-7.65 (m, 1H), 7.65-7.60 (m, 2H), 7.54 (t, *J* = 7.5 Hz, 1H), 7.06-7.01 (m, 2H), 3.98 (t, *J* = 6.6 Hz, 2H), 1.89-1.80 (m, 2H), 1.07 (t, *J* = 7.5 Hz, 3H). **13C NMR** (150 MHz, CDCl3) δ 159.3, 149.8, 147.0, 133.5, 132.2, 130.0, 129.1, 128.9, 128.4, 128.1, 127.8, 126.8, 115.2, 69.6, 22.5, 10.5. **HRMS** (ESI) m/z calcd. for C18H18NO+ [M + H]+ 264.1383, found 264.1394.

**Step 2:** [8]To a 100 mL round bottom flask equipped with a magnetic stirbar, compound **134′** (131.6 mg, 0.5 mmol, 1.0 equiv.), *m*-chloroperbenzoic acid (172.6 mg, 2.0 mmol, 2.0 equiv.) and DCM (10.0 mL) were added. The mixture was stirred for 12 h at room temperature and then the organic phase was washed with a saturated aqueous NaHCO3 solution (20 mL) and brine (20 mL). The aqueous layer was extracted with DCM (25 mL x 3). The combined organic layers were dried over anhydrous Na2SO4, filtered and concentrated under reduced pressure. The crude mixture was used in the following step without further purification.[9]To a stirred solution of crude mixture in anhydrous DMF (10.0 mL) at room temperature was added chlorinating reagent 1-Chloro-1,2-benziodoxol-3-(1*H*)-one (282.46 mg, 1.0 mmol), and the mixture was stirred for 12 h under air condition. After completion of reaction monitored by TLC, the resulting mixture quenched with saturated aqueous NaHCO3, then extracted with ethyl acetate (15 mL × 3). The combined organic layer was dried over anhydrous Na2SO4 and filtered. The solution was removed by evaporation under reduced pressure to afford the crude product. The crude product was used in the following step without further purification. [10]Then the crude product was dissolved in toluene in round bottom flask with stirring at room temperature. And then PCl3 (103.0 mg, 0.75 mmol) was added, and stirred at 50 °C for 3 h. Saturated NaHCO3 was added to the reaction mixture, and extracted with ethyl acetate (15 mL × 3), washed with brine (15.0 mL), dried over anhydrous Na2SO4, filtered, and evaporated. The crude mixture was purified by column chromatography on silica gel to give the product **134''** (111.4 mg, 75% yield), as a white solid; mp: 76-77 °C. **1H NMR** (500 MHz, CDCl3) δ 8.86 (s, 1H), 8.37-8.31 (m, 1H), 8.15 (d, *J* = 8.5 Hz, 1H), 7.80-7.73 (m, 1H), 7.70-7.65 (m, 1H), 7.51-7.46 (m, 2H), 7.08-7.01 (m, 2H), 4.00 (t, *J* = 6.5 Hz, 2H), 1.92-1.81 (m, 2H), 1.08 (t, *J* = 7.5 Hz, 3H). **13C NMR** (125 MHz, CDCl3) δ 159.3, 151.7, 147.7, 139.6, 132.9, 131.1, 129.8, 129.6, 128.3, 127.9, 126.5, 124.6, 114.5, 69.6, 22.6, 10.5. **HRMS** (ESI) m/z calcd. for C18H17ClNO+ [M + H]+ 298.0993, found 298.0980.

**Step 3:** [11]Under a N2 atmosphere, a solution of 2-(diethylamino)ethanol (105.5 mg, 0.9 mmol, 3.0 equiv.) in dry DMF (1.00 mL) was added to a suspension of NaH (48 mg, 1.2 mmol, 60 wt% dispersion in mineral oil, 4.0 equiv.) in dry DMF (1.0 mL). After 10 min of stirring, a solution of compound **134''** (89.13 mg, 0.3 mmol, 1.0 equiv.) in dry DMF (1.0 mL) was added, and the reaction mixture was stirred at room temperature for 3 h. Then, the mixture was poured in ice/water and extracted with EtOAc (10 mL × 3). The organic layerwas washed with brine, dried over anhydrous Na2SO4, filtered, and evaporated. The crude mixture was purified by column chromatography on silica gel to give the product **134** (62.4 mg, 55% yield), as a yellow oil. **1H NMR** (500 MHz, CDCl3) δ 8.84 (s, 1H), 8.31 (d, *J* = 8.5 Hz, 1H), 8.08 (d, *J* = 8.5 Hz, 1H), 7.72-7.67 (m, 1H), 7.59-7.52 (m, 3H), 7.04-6.99 (m, 2H), 3.98 (t, *J* = 6.5 Hz, 2H), 3.79 (t, *J* = 6.5 Hz, 2H), 2.71 (t, *J* = 6.5 Hz, 2H), 2.47 (q, *J* = 7.0 Hz, 4H), 1.89-1.80 (m, 2H), 1.07 (t, *J* = 7.5 Hz, 3H), 0.94 (t, *J* = 7.5 Hz, 6H). **13C NMR** (150 MHz, CDCl3) δ 159.4, 158.9, 153.4, 148.9, 130.4, 129.3, 129.1, 127.7, 126.3, 124.17, 124.15, 122.6, 114.8, 71.7, 69.6, 52.6, 47.3, 22.6, 11.7, 10.5. **HRMS** (ESI) m/z calcd. for C24H31N2O2+ [M + H]+ 397.2380, found 397.2397. The spectrum was consistent with the previous literature[11].

### Synthesis of compound 138

**Step 1:** In a glove box, an oven-driedtube was charged with *N*-triftosylhydrazone (358.0 mg, 1.0 mmol, 1.0 equiv.), NaH (80 mg, 2.0 mmol, 2.0 equiv., 60 wt% dispersion in mineral oil), 1-(*tert*-butyldimethylsilyl)-2-methyl-1*H*-indole (490.0 mg, 2.0 mmol, 2.0 equiv.), TpBr3Ag(THF) (120.0 mg, 10.0 mol%) and PhCF3 (10.0 mL). Next, the sealed vial was removed from glovebox and stirred at 100 °C for 24 h. After cooling to room temperature, the reaction mixture was added TBAF (2.5 mL, 2.5 mmol, 1.0 mol/L in THF, 2.5 equiv.) and stirred at 25 °C for 10 min. After completion of the reaction, the mixture was filtered through a short pad of silica gel (pre-treated with triethylamine) with DCM as an eluent. After removal of the solvent *in vacuo*, the residue was purified by flash chromatography on silica gel (pre- treated with trimethylamine, using petroleum ether-EtOAc as eluent) to give the product **137′** (199.2 mg, 80% yield), as a white solid; mp: 69-70 °C. **1H NMR** (500 MHz, CDCl3) δ 8.06 (d, *J* = 8.5 Hz, 1H), 7.89 (s, 1H), 7.73 (d, *J* = 8.0 Hz, 1H), 7.68-7.63 (m, 1H), 7.45 (t, *J* = 7.5 Hz, 1H), 7.32-7.27 (m, 2H), 7.00-6.95 (m, 2H), 3.84 (s, 3H), 2.67 (s, 3H). **13C NMR** (150 MHz, CDCl3) δ 159.0, 157.5, 146.8, 135.8, 135.2, 132.0, 130.2, 129.0, 128.3, 127.2, 126.8, 125.8, 113.7, 55.2, 24.5. **HRMS** (ESI) m/z calcd. for C17H6NO+ [M + H]+ 250.1226, found 250.1225.

**Step 2:** [12]A mixture **137′** (124.5 mg, 0.5 mmol, 1.0 equiv.) and selenium dioxide (111.0 mg, 1.0 mmol, 2.0 equiv.) in 1,4-dioxane (5.0 mL) was heated to 100 °C for 2 h. The mixture was diluted with saturated aqueous NaHCO3 (50 mL) and extracted with DCM (10 mL × 3). The combined organic layers were washed with H2O followed by brine, dried over anhydrous Na2SO4, filtered, and evaporated. The crude mixture was purified by column chromatography on silica gel to give the product **137** (102.6 mg, 78% yield), as a white solid; mp: 105-106 °C. **1H NMR** (500 MHz, CDCl3) δ 10.27 (s, 1H), 8.30 (d, *J* = 8.5 Hz, 1H), 8.18 (s, 1H), 7.88 (d, *J* = 8.0 Hz, 1H), 7.82-7.77 (m, 1H), 7.70-7.65 (m, 1H), 7.38-7.33 (m, 2H), 7.05-6.99 (m, 2H), 3.88 (s, 3H). **13C NMR** (150 MHz, CDCl3) δ 192.5, 159.7, 149.9, 146.9, 138.4, 135.5, 130.7, 130.5, 130.3, 129.3, 129.1, 128.9, 127.5, 114.0, 55.3. **HRMS** (ESI) m/z calcd. for C17H14NO2+ [M + H]+ 264.1019, found 264.1022.

**Step 3:** [13]Compound **137** (78.9 mg, 0.3 mmol, 1.0 equiv.) and acetophenone (39.6 mg, 0.33 mmol, 1.1 equiv.) in EtOH (5.0 mL) were stirred at 0 °C for 15 min. Aqueous solution of KOH (6.0 equiv.) was added and the mixture was stirred at room temperature for 12 h. After the reaction reached completion, the resulting mixture was added 1 M HCl until pH 3 resulted and extracted with ethyl acetate (10 mL × 3). The organic layer was collected, dried over anhydrous Na2SO4, filtered, and evaporated. The crude mixture was purified by column chromatography on silica gel to give the product **138** (100.7 mg, 92% yield), as a white solid; mp: 140-142 °C. **1H NMR** (500 MHz, CDCl3) δ 8.40 (d, *J* = 15.0 Hz, 1H), 8.19 (d, *J* = 8.5 Hz, 1H), 8.15-8.09 (m, 3H), 8.02 (d, *J* = 15.0 Hz, 1H), 7.84 (d, *J* = 8.0 Hz, 1H), 7.75 (t, *J* = 7.5 Hz, 1H), 7.62-7.55 (m, 2H), 7.52 (t, *J* = 7.5 Hz, 2H), 7.40-7.35 (m, 2H), 7.06-7.02 (m, 2H), 3.90 (s, 3H). **13C NMR** (150 MHz, CDCl3) δ 190.3, 159.6, 151.5, 147.2, 141.3, 138.0, 136.9, 136.3, 133.0, 131.1, 130.5, 129.8, 129.7, 128.8, 128.6, 128.3, 127.46, 127.45, 127.4, 114.2, 55.4. **HRMS** (ESI) m/z calcd. for C25H20NO2+ [M + H]+ 366.1489, found 366.1492. The spectrum was consistent with the previous literature[13].

### Synthesis of compound 139

**Procedure A:** [14]A mixture of **137** (78.9 mg, 0.3 mmol), phenyl magnesium bromide (0.9 mL, 0.9 mmol, 1 M solution in THF), and THF (10 mL) was stirded at 0 °C for 12 h. The reaction was quenched by addition of water (5.0 mL) and partitioned between H2O (10 mL) and DCM (15 mL). The organic layer was washed with brine and dried over anhydrous Na2SO4, filtered, and evaporated. The crude mixture was purified by column chromatography on silica gel to give the product **139** (59.3 mg, 58% yield), as a white solid; mp: 115-117 °C. **1H NMR** (500 MHz, CDCl3) δ 8.24 (d, *J* = 8.5 Hz, 1H), 7.93 (s, 1H), 7.82 (d, *J* = 8.0 Hz, 1H), 7.78 (t, *J* = 7.5 Hz, 1H), 7.58 (t, *J* = 7.5 Hz, 1H), 7.15-7.06 (m, 3H), 7.00-6.94 (m, 2H), 6.91-6.86 (m, 2H), 6.86-6.82 (m, 2H), 6.37 (d, *J* = 6.5 Hz, 1H), 6.05 (d, *J* = 6.5 Hz, 1H), 3.87 (s, 3H). **13C NMR** (150 MHz, CDCl3) δ 159.2, 159.0, 145.0, 142.3, 137.4, 133.8, 130.4, 130.0, 129.6, 128.5, 127.8, 127.5, 127.4, 127.3, 127.1, 126.7, 113.6, 72.7, 55.2. **HRMS** (ESI) m/z calcd. for C23H20NO2+ [M + H]+ 342.1489, found 342.1488. The spectrum was consistent with the previous literature[14].

### Synthesis of compound 140

**Step 1:** In a glove box, an oven-driedtube was charged with *N*-triftosylhydrazone (418.0 mg, 1.0 mmol, 1.0 equiv.), NaH (80 mg, 2.0 mmol, 2.0 equiv., 60 wt% dispersion in mineral oil), 1-(*tert*-butyldimethylsilyl)-2-methyl-1*H*-indole (490.0 mg, 2.0 mmol, 2.0 equiv.), TpBr3Ag(THF) (120.0 mg, 10.0 mol%) and PhCF3 (10.0 mL). Next, the sealed vial was removed from glovebox and stirred at 100 °C for 24 h. After cooling to room temperature, the reaction mixture was added TBAF (2.5 mL, 2.5 mmol, 1.0 mol/L in THF, 2.5 equiv.) and stirred at 25 °C for 10 min. After completion of the reaction, the mixture was filtered through a short pad of silica gel (pre-treated with triethylamine) with DCM as an eluent. After removal of the solvent *in vacuo*, the residue was purified by flash chromatography on silica gel (pre- treated with trimethylamine, using petroleum ether-EtOAc as eluent) to give the product **140'** (278.1 mg, 90% yield), as a pale yellow oil. **1H NMR** (500 MHz, CDCl3) δ 8.05 (d, *J* = 8.5 Hz, 1H), 7.96 (s, 1H), 7.78 (d, *J* = 8.0 Hz, 1H), 7.68 (t, *J* = 7.5 Hz, 1H), 7.49 (t, *J* = 7.5 Hz, 1H), 6.59 (s, 2H), 3.94 (s, 3H), 3.88 (s, 6H), 2.69 (s, 3H). **13C NMR** (150 MHz, CDCl3) δ 157.2, 152.9, 147.0, 137.3, 135.8, 135.6, 135.5, 129.3, 128.4, 127.3, 126.6, 126.1, 106.4, 61.0, 56.2, 24.5. **HRMS** (ESI) m/z calcd. for C19H20NO3+ [M + H]+ 310.1438, found 310.1449.

**Step 2:** [12]A mixture **140'** (1.0 mmol, 1.0 equiv.) and selenium dioxide (2.0 mmol, 2.0 equiv.) in 1,4-dioxane (5.0 mL) was heated to 100 °C for 2 h. The mixture was diluted with saturated aqueous NaHCO3 (50 mL) and extracted with DCM (10 mL × 3). The combined organic layers were washed with H2O followed by brine, dried over anhydrous Na2SO4, filtered, and evaporated. The crude mixture was purified by column chromatography on silica gel to give the product **140''** (126.0 mg, 78% yield), as a white solide. mp: 140-142 ºC. **1H NMR** (500 MHz, CDCl3) δ 10.28 (s, 1H), 8.34 (d, *J* = 8.5 Hz, 1H), 8.24 (s, 1H), 7.92 (d, *J* = 8.0 Hz, 1H), 7.86-7.81 (m, 1H), 7.74-7.69 (m, 1H), 6.63 (s, 2H), 3.94 (s, 3H), 3.89 (s, 6H). **13C NMR** (125 MHz, CDCl3) δ 192.3, 153.2, 149.9, 147.1, 138.3, 138.1, 135.9, 132.4, 130.61, 130.57, 129.5, 128.8, 127.5, 107.0, 61.0, 56.2. **HRMS** (ESI) m/z calcd. for C19H18NO4+ [M + H]+ 324.1230, found 324.1218.

**Step 3:** [12]A mixture of **140''** (0.3 mmol), phenyl magnesium bromide (0.9 mmol, 0.9 mL of a 1 M solution in THF), and THF (10 mL) was stirded at 0 °C for 12 h. The reaction was quenched by addition of water (5.0 mL) and partitioned between H2O (10 mL) and DCM (15 mL). The organic layer was washed with brine and dried over anhydrous Na2SO4, filtered, and evaporated. The crude product was used in the following step without further purification. [12]A mixture of the crude product and MnO2 (10.0 mmol, 10 equiv.) in DCM (20 mL) was stirred at room temperature for 12 h. The reaction mixture was partitioned between H2O (10 mL) and DCM (15 mL). The organic layer was washed with brine, dried over anhydrous Na2SO4, filtered, and evaporated. The crude mixture was purified by column chromatography on silica gel to give the product **140** (61.8 mg, 48% yield), as a white solid; mp: 152-153 °C. **1H NMR** (500 MHz, CDCl3) δ 8.28 (s, 1H), 8.17 (d, *J* = 8.5 Hz, 1H), 7.93 (d, *J* = 8.0 Hz, 1H), 7.90-7.85 (m, 2H), 7.80-7.75 (m, 1H), 7.65 (t, *J* = 7.5 Hz, 1H), 6.91-6.86 (m, 2H), 6.61 (s, 2H), 3.85 (s, 3H), 3.83 (s, 3H), 3.69 (s, 6H). **13C NMR** (125 MHz, CDCl3) δ 194.0, 164.0, 156.9, 153.2, 146.1, 137.8, 136.5, 133.6, 133.1, 132.7, 130.1, 129.6, 129.4, 127.9, 127.8, 127.7, 113.8, 106.4, 60.8, 56.0, 55.5. **HRMS** (ESI) m/z calcd. for C26H24NO5+ [M + H]+ 430.1649, found 430.1650. The spectrum was consistent with the previous literature[12].

### Synthesis of compound 142

**Step 1:** In a glove box, an oven-driedtube was charged with *N*-triftosylhydrazone (358.0 mg, 1.0 mmol, 1.0 equiv.), NaH (80 mg, 2.0 mmol, 2.0 equiv., 60 wt% dispersion in mineral oil), 1-(*tert*-butyldimethylsilyl)-5-fluoro-2-methyl-1*H*-indole (526.0 mg, 2.0 mmol, 2.0 equiv.), TpBr3Ag(THF) (120.0 mg, 10.0 mol%) and PhCF3 (10.0 mL). Next, the sealed vial was removed from glovebox and stirred at 100 °C for 24 h. After cooling to room temperature, the reaction mixture was added TBAF (2.5 mL, 2.5 mmol, 1.0 mol/L in THF, 2.5 equiv.) and stirred at 25 °C for 10 min. After completion of the reaction, the mixture was filtered through a short pad of silica gel (pre-treated with triethylamine) with DCM as an eluent. After removal of the solvent *in vacuo*, the residue was purified by flash chromatography on silica gel (pre- treated with trimethylamine, using petroleum ether-EtOAc as eluent) to give the product **142'** (216.3 mg, 81% yield), as a white solid; mp: 86-88 °C. **1H NMR** (500 MHz, CDCl3) δ 8.03 (dd, *J* = 9.0, 5.5 Hz, 1H), 7.87 (s, 1H), 7.43 (td, *J* = 9.0, 3.0 Hz, 1H), 7.37 (dd, *J* = 9.0, 3.0 Hz, 1H), 7.34-7.29 (m, 2H), 7.03-6.98 (m, 2H), 3.88 (s, 3H), 2.65 (s, 3H). **13C NMR** (150 MHz, CDCl3) δ 160.2 (d, *J* = 246.0 Hz), 159.3, 157.0 (d, *J* = 1.5 Hz), 144.0, 136.2, 135.3 (d, *J* = 4.5 Hz), 131.8, 130.8 (d, *J* = 7.5 Hz), 130.3, 127.4 (d, *J* = 10.5 Hz), 119.2 (d, *J* = 25.5 Hz), 113.9, 110.3 (d, *J* = 21.0 Hz), 55.3, 24.5. **19F NMR** (564 MHz, CDCl3) δ (-114.47)-(-114.59) (m). **HRMS** (ESI) m/z calcd. for C17H15FNO+ [M + H]+ 268.1132, found 268.1135.

**Step 2:** [12]A mixture **142'** (133.5 mg, 0.5 mmol, 1.0 equiv.) and selenium dioxide (112.0 mg, 1.0 mmol, 2.0 equiv.) in 1,4-dioxane (5.0 mL) was heated to 100 °C for 2 h. The mixture was diluted with saturated aqueous NaHCO3 (50 mL) and extracted with DCM (10 mL × 3). The combined organic layers were washed with H2O followed by brine, dried over anhydrous Na2SO4, filtered, and evaporated. The crude mixture was purified by column chromatography on silica gel to give the product **142''** (111.0 mg, 79% yield), as a white solid; mp: 122-123 °C. **1H NMR** (500 MHz, CDCl3) δ 10.24 (s, 1H), 8.32 (dd, *J* = 9.5, 5.5 Hz, 1H), 8.13 (s, 1H), 7.61-7.55 (m, 1H), 7.49 (dd, *J* = 8.5, 2.5 Hz, 1H), 7.39-7.33 (m, 2H), 7.06-7.00 (m, 2H), 3.89 (s, 3H). **13C NMR** (150 MHz, CDCl3) δ 192.2, 162.2 (d, *J* = 252.0 Hz), 159.9, 149.4 (d, *J* = 4.5 Hz), 144.1, 137.7 (d, *J* = 6.0 Hz), 136.3, 133.3 (d, *J* = 9.0 Hz), 130.8, 129.9 (d, *J* = 10.5 Hz), 128.7, 121.0 (d, *J* = 25.5 Hz), 114.1, 110.4 (d, *J* = 22.5 Hz), 55.4. **19F NMR** (564 MHz, CDCl3) δ (-115.37)-(-115.26) (m). **HRMS** (ESI) m/z calcd. for C17H13FNO2+ [M + H]+ 282.0925, found 282.0927.

**Step 3:** [19]The compound **142''** (84.3 mg, 0.3 mmol, 1.0 equiv.) and 2,4-thiazolidinedione (52.7 mg, 0.45 mmol, 1.5 equiv.) were dissolved in anhydrous EtOH (10 mL) at room temperature and piperidine (0.1 mmol) was added to the reaction flask. The reaction mixture was stirred at 75 °C for 24 h and then allowed to cool down to room temperature until the reaction was completed. After removal of the solvent *in vacuo*, the residue was purified by flash chromatography on silica gel (pre-treated with trimethylamine, using petroleum ether-EtOAc as eluent) to give the product **142** (71.8 mg, 63% yield), as a red solide, mp: 297-298 °C. **1H NMR** (500 MHz, DMSO-*d*6) δ 12.48 (s, 1H), 8.33 (s, 1H), 8.18 (dd, *J* = 9.0, 5.5 Hz, 1H), 7.80 (dd, *J* = 9.0, 2.5 Hz, 1H), 7.72 (td, *J* = 9.0, 3.0 Hz, 1H), 7.67 (s, 1H), 7.43 (d, *J* = 8.5 Hz, 2H), 7.14 (d, *J* = 8.5 Hz, 2H), 3.86 (s, 3H). **13C NMR** (150 MHz, DMSO-*d*6) δ 172.9, 167.9, 161.1 (d, *J* = 247.5 Hz), 159.9, 149.5, 143.5, 137.3, 137.1, 131.5, 131.4, 131.2, 129.5, 128.2 (d, *J* = 10.5 Hz), 124.9, 121.3 (d, *J* = 25.5 Hz), 114.8, 111.5 (d, *J* = 21.0 Hz), 55.8. **19F NMR** (564 MHz, DMSO-*d*6) δ (-110.85)-(-110.95) (m). **HRMS** (ESI) m/z calcd. for C20H14FN2O3S+ [M + H]+ 381.0704, found 381.0709.

**5. Mechanistic Considerations**

## 5.1 Controlled Experiment

**Fig. S1.** Controlled Experiment.

### 5.1.1 Identification of the Reaction Intermediate

To an oven-dried screw-cap reaction tube were added TFHZ-Tfs **2** (115.3 mg, 0.36 mmol, 1.2 equiv.), NaH (28.8 mg, 0.72 mmol, 60 wt% dispersion in mineral oil, 2.4 equiv.), methyl 1-(*tert*-butyldimethylsilyl)-1*H*-indole-5-carboxylate (86.7 mg, 0.3 mmol, 1.0 equiv.), TpBr3Cu(NCMe) (36.0 mg, 10.0 mol%) and PhCF3 (10 mL) inside a glove box with nitrogen atmosphere. After transfer out of the glove box, the reaction was continued for an additional 12 h at 60 °C. The reaction mixture was filtered through a short pad of silica gel with DCM as an eluent. After removal of the solvent, the reside was purified by flash column chromatography on silica gel (using petroleum ether-EtOAc as eluent) to give the product **144** (105.7mg, 95% yield), as a white solide, mp: 110-112 °C. **1H NMR** (500 MHz, CDCl3) δ 7.99 (s, 1H), 7.78 (d, *J* = 8.5 Hz, 1H), 6.73 (d, *J* = 8.5 Hz, 1H), 3.92 (s, 1H), 3.86 (s, 3H), 3.10 (d, *J* = 4.0 Hz, 1H), 0.99 (s, 9H), 0.80-0.73 (m, 1H), 0.43 (d, *J* = 17.0 Hz, 6H). **13C NMR** (150 MHz, CDCl3) δ 167.1, 154.7, 130.1, 129.8, 126.3, 126.2 (q, *J* = 270.0 Hz), 119.8, 110.6, 51.7, 44.2 (q, *J* = 4.5 Hz), 26.4, 24.9 (q, *J* = 4.5 Hz), 21.3 (q, *J* = 36.0 Hz), 20.2, -4.6. **19F NMR** (564 MHz, CDCl3) δ -64.25 (d, *J* = 7.3 Hz). **HRMS** (ESI) m/z calcd. for C18H25F3NO2Si+ [M + H]+ 372.1601, found 372.1594.

Compound **144** (0.1 mmol, 1.0 equiv.) and CsF (0.12 mmol, 1.2 equiv.) in DMSO-*d*6 (1.0 mL) were stirred at 40 °C for 5 h under N2 atmosphere. The mixture was directly analyzed by 1H NMR spectroscopy. The results showed that approximately 40% of the products **145** and 42% of the products **146** were produced in the reaction system. Product **145** can be separated by column chromatography, and the spectrum is shown below, while product **146** can not be separated by column chromatography.

Treating these mixtures of **145** and **146** to oxidative conditions in water furnished the quinoline-3-carboxaldehyde product **62** in 80% yield, indicating **145** or **146** could be the critical intermediate of the process.

(**145**) **1H NMR** (500 MHz, CDCl3) δ 7.75-7.71 (m, 1H), 7.70 (s, 1H), 6.63 (d, *J* = 4.0 Hz, 1H), 6.57 (d, *J* = 8.0 Hz, 1H), 5.89 (s, 1H), 3.87 (s, 3H), 3.68 (s, 2H). **13C NMR** (150 MHz, CDCl3) δ 166.6, 141.4, 131.5, 129.4, 128.0 (q. *J* = 6.0 Hz), 124.8 (q, *J* = 267.0 Hz), 124.2, 98.5 (q, *J* = 33.0 Hz) 118.5, 114.2, 51.9, 24.1. **19F NMR** (564 MHz, CDCl3) δ -68.22. **HRMS** (ESI) m/z calcd. for C12H11F3NO2+ [M + H]+ 258.0736, found 258.0730.


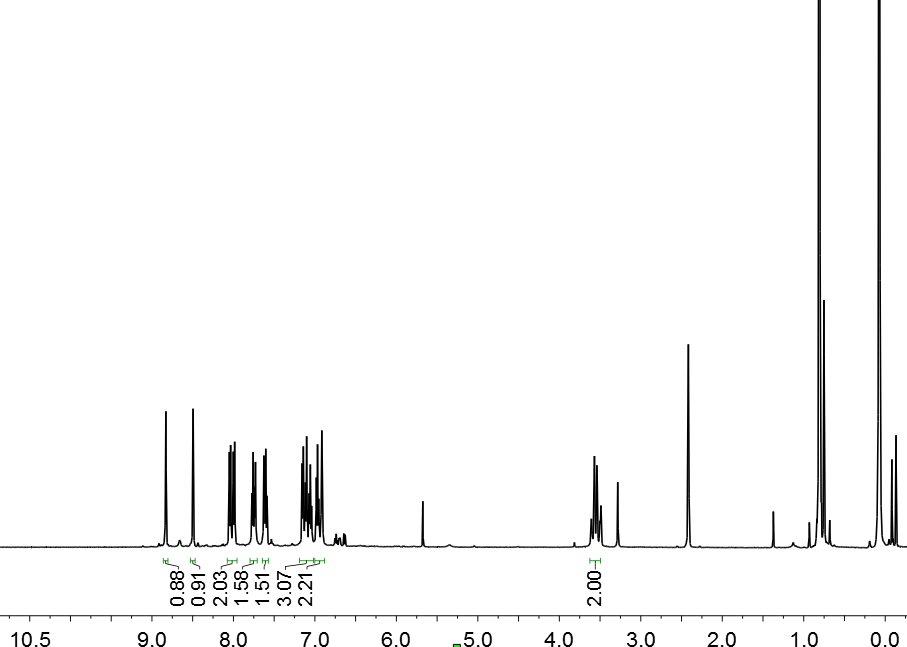


**Fig. S2.** The 1H NMR spectrum of the mixture of **145** and **145**

**Fig. S3.** The 19F NMR spectrum of of the mixture of **145** and **146**

The compound **29** was dissolved in DMSO (5.0 mL). Then H2O (20 equiv.) and CsF (54.7 mg, 1.2 equiv.) were added into the reaction mixture. The reaction was continued for an additional 5 h at 40 °C. The experimental results showed that no product **62** was generated, while compound **29** was almost completely recovered.

To an oven-dried screw-cap reaction tube were added *N*-triftosylhydrazone (102.6 mg, 0.3 mmol, 1.0 equiv.), NaH (24 mg, 2.0 equiv., 60 wt% dispersion in mineral oil), *N*-TBS indole (138.6 mg, 0.6 mmol, 2.0 equiv.), TpBr3Ag(THF) (36 mg, 10.0 mol%) and PhCF3 inside a glove box with nitrogen atmosphere. After transfer out of the glove box, the reaction was continued for an additional 12 h at 60 °C and give the **Cyclopropane 70** (97.5 mg, 97% yield). **1H NMR** (500 HMz, CDCl3)δ 7.32 (d, *J* = 7.0 Hz, 1H), 7.13 (d, *J* = 6.5 Hz, 2H), 7.06 (t, *J* = 7.5 Hz, 1H), 6.93-6.85 (m, 2H), 6.82 (dd, *J* = 8.0, 2.5 Hz, 1H), 6.74 (td, *J* = 7.5, 2.5 Hz, 1H), 3.78-3.70 (m, 1H), 3.04-2.94 (m, 1H), 2.37 (s, 3H), 1.25-1.20 (m, 1H), 1.03 (s, 9H), 0.41 (s, 6H). **13C NMR** (150 HMz, CDCl3)δ 151.1, 139.2, 134.6, 133.3, 129.1, 126.3, 124.9, 124.0, 117.2, 110.9, 50.8, 32.8, 26.6, 20.9, 20.2, -4.4, -4.7. **HRMS** (ESI) m/z calcd. for C22H30NSi+ [M + H]+ 336.2142, found 336.2146.

**Step 1:** **Cyclopropane 70** (33.5 mg, 0.1 mmol, 1.0 equiv.) and CsF (18.2 mg, 0.12 mmol, 1.2 equiv.) in DMSO-*d*6 (1.0 mL) were stirred at 25 °C for 10 min under N2 atmosphere. The mixture was directly analyzed by 1H NMR spectroscopy and HRMS. The **Intermediate 70** can be observed in the 1H NMR spectrum of the reaction mixture.

**Step 2:** Then the reaction was continued for an additional 10 min at 25 °C under air atmosphere, and diluted with DCM, washed with brine, dried over anhydrous Na2SO4, filtered and the solvent was evaporated under reduced pressure to leave a crude product. The crude product was purified by flash column chromatography on silica gel (pre-treated with trimethylamine, using petroleum ether-EtOAc as eluent) to give the product **70** (80% yield).


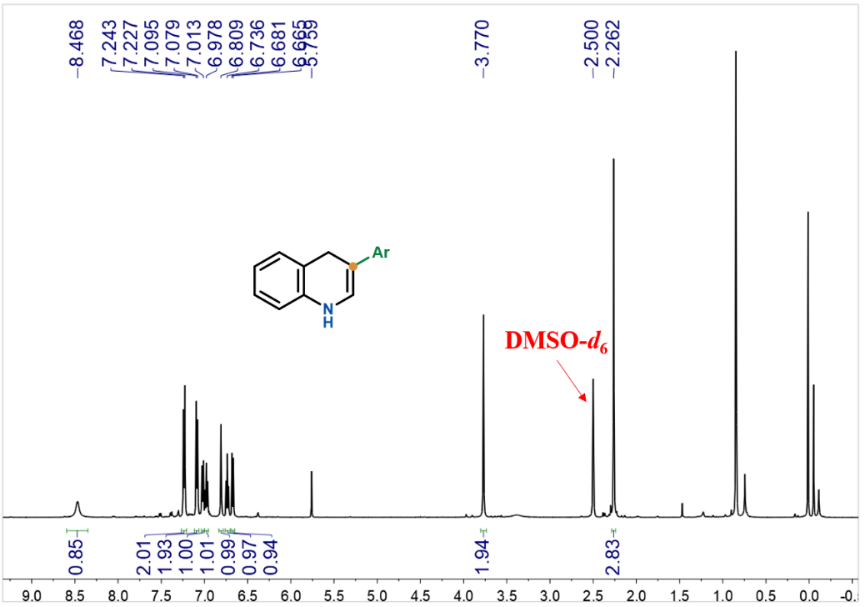


**Fig. S4.** Monitoring **Intermediate 70** by 1H NMR spectrum

**Fig. S5.** Monitoring **Intermediate 70** by HRMS.

**HRMS** (ESI) m/z calcd. for C16H16N+ [M + H]+ 222.1277, found 222.1259.

### 5.1.2 Deuterium-Labeling Experiments

**Procedure** : The **indole-*d*** was prepared according to literature procedure. [16]Indole (585 mg, 5.0 mmol, 1.0 equiv.) was stirred in a 0.01 M solution of DCl in D2O (20 mL) at 60°C for 4 h under N2. The reaction was cooled and extracted three times with dry Et2O. The organic layers were combined, dried over anhydrous Na2SO4 and filtered and reduced under vacuum. The resulting oil was triturated in pentane to afford a colorless solid. The solid ([1,3-D]indole) was dissolved in a mixture of Et2O (20 mL) and H2O (10 mL) and stirred for 2 h at room temperature. The layers were separated and the aqueous layer extracted twice with Et2O (20 mL). The organic layers were combined, dried over anhydrous Na2SO4 and filtered and reduced under vacuum to give the **indole-*d*** as a white solid.

The **1-*d*** in anhydrous THF (20 mL) was added dropwise to a stirred suspension of NaH (2.4 g, 6.0 mmol, 1.2 equiv., 60% dispersion in mineral oil) in THF (40 mL) at 0 °C. The mixture was allowed to slowly warm to room temperature over 30 min, cooled to 0 °C, and TBSCl (979.6 mg, 6.5 mmol, 1.3 equiv.) was added portionwise. The resulting mixture was slowly warmed to room temperature and stirred until full consumption of starting material as monitored by TLC. On completion, the reaction was quenched at 0 °C with sat. aqueous NH4Cl solution (10 mL) and extracted with EtOAc (20 mL). The combined organic phases were washed with brine and dried over anhydrous Na2SO4. The crude mixture was concentrated under reduced pressure and purified by flash column chromatography to afford product **1-*d*** as white solid (1.1 g, 95% yield).


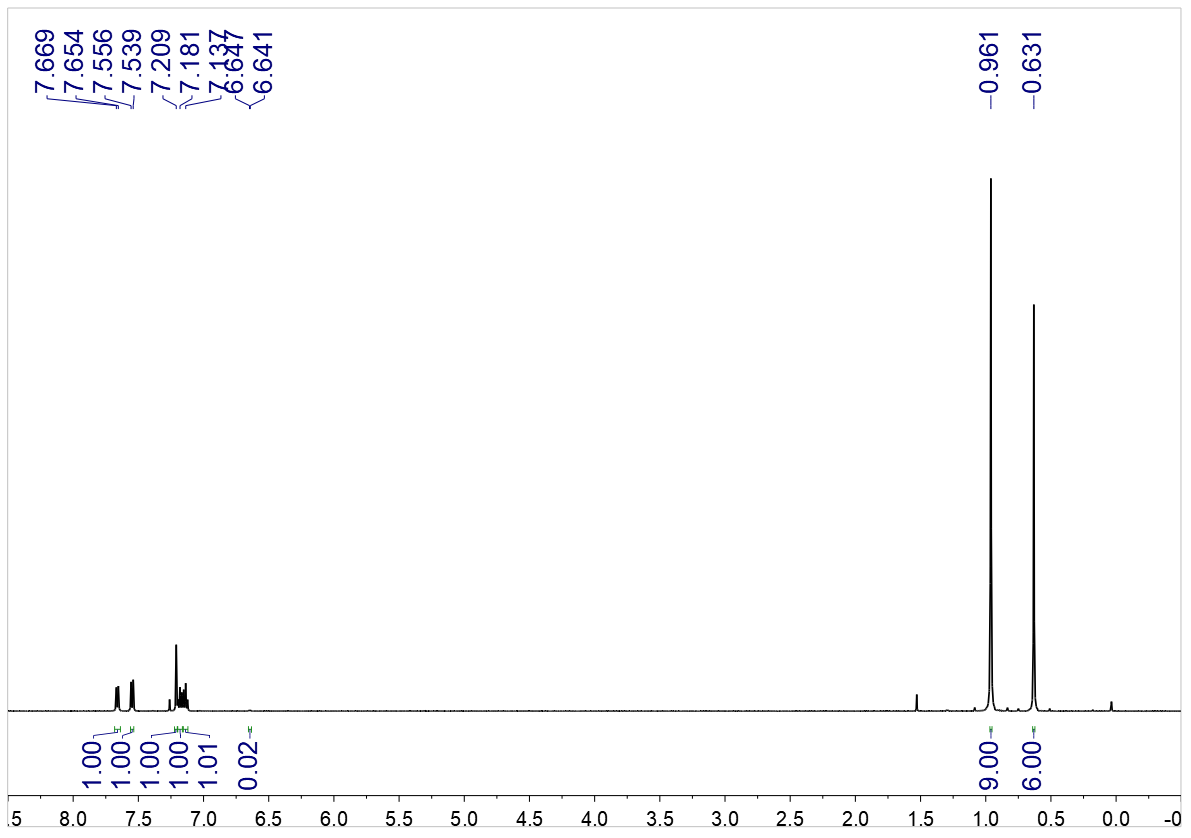


**Fig. S6.** The 1H NMR spectrum of **1-*d***

**1H NMR** (500 MHz, CDCl3) δ 7.66 (d, *J* = 7.5 Hz, 1H), 7.55 (d, *J* = 8.0 Hz, 1H), 7.21 (s, 1H), 7.20-7.16 (m, 1H), 7.14 (t, *J* = 7.5 Hz, 1H), 6.64 (d, *J* = 3.0 Hz, 1H), 0.96 (s, 1H), 0.63 (s, 1H).

**For trifluoromethyl-substituted *N*-triftosylhydrazone**

To an oven-dried screw-cap reaction tube were added TFHZ-Tfs **2** (115.3 mg, 0.36 mmol, 1.2 equiv.), NaH (28.8 mg, 0.72 mmol, 60 wt% dispersion in mineral oil, 2.4 equiv.), *N*-TBS indole (69.4 mg, 0.3 mmol, 1.0 equiv.), TpBr3Cu(NCMe) (36.0 mg, 10.0 mol%) and PhCF3inside a glove box with nitrogen atmosphere. After transfer out of the glove box, the reaction was continued for an additional 12 h at 60 °C. The reaction mixture was filtered through a short pad of silica gel with DCM as an eluent. After removal of the solvent *in* *vacuo*, the residue was purified by flash column chromatography on silica gel to give the product **147** (85.4 mg, 91% yield). **1H NMR** (500 MHz, CDCl3) δ 7.34 (d, *J* = 7.5 Hz, 1H), 7.06 (dd, *J* = 11.5, 4.0 Hz, 1H), 6.78 (d, *J* = 8.0 Hz, 1H), 6.75 (dd, *J* = 11.5, 4.0 Hz, 1H), 3.92 (dd, *J* = 7.0, 2.0 Hz, 1H), 3.10 (dd, *J* = 7.0, 3.0 Hz, 1H), 1.00 (s, 9H), 0.44 (s, 3H), 0.40 (s, 3H). **13C NMR** (150 MHz, CDCl3) δ 150.3, 129.7, 127.2, 126.6 (q, *J* = 270.0 Hz), 124.6, 117.8, 111.4, 43.5 (q, *J* = 3.0 Hz), 26.5, 25.4 (q, *J* = 3.0 Hz), 21.1 (q, *J* = 36.0 Hz), 20.2, -4.65, -4.68. **19F NMR** (564 MHz, CDCl3) δ -64.04 (d, *J* = 7.3 Hz). **HRMS** (ESI) m/z calcd. for C16H23F3NSi+ [M + H]+ 314.1546, found 314.1544.

To an oven-dried screw-cap reaction tube were added **147-*d*** (31.4 mg, 0.1 mmol, 1.0 equiv.), TBAF (0.12 mL, 0.12 mmol, 1.0 mol/L in THF, 1.2 equiv.), D2O (20 equiv.) were stired at 25 °C for 10 min under N2 atmosphere. The mixture was directly analyzed by 1H NMR spectroscopy and HRMS. The intermediate **148-*d2*** can be observed in the 1H NMR spectrum of the reaction mixture. And then CsF, H2O and DMSO were added into the reaction mixture, and stired at 40 °C for 5 h under air atmosphere. The deuterated product **56-*d*** can be obtained. The deuterium ratio is shown below.


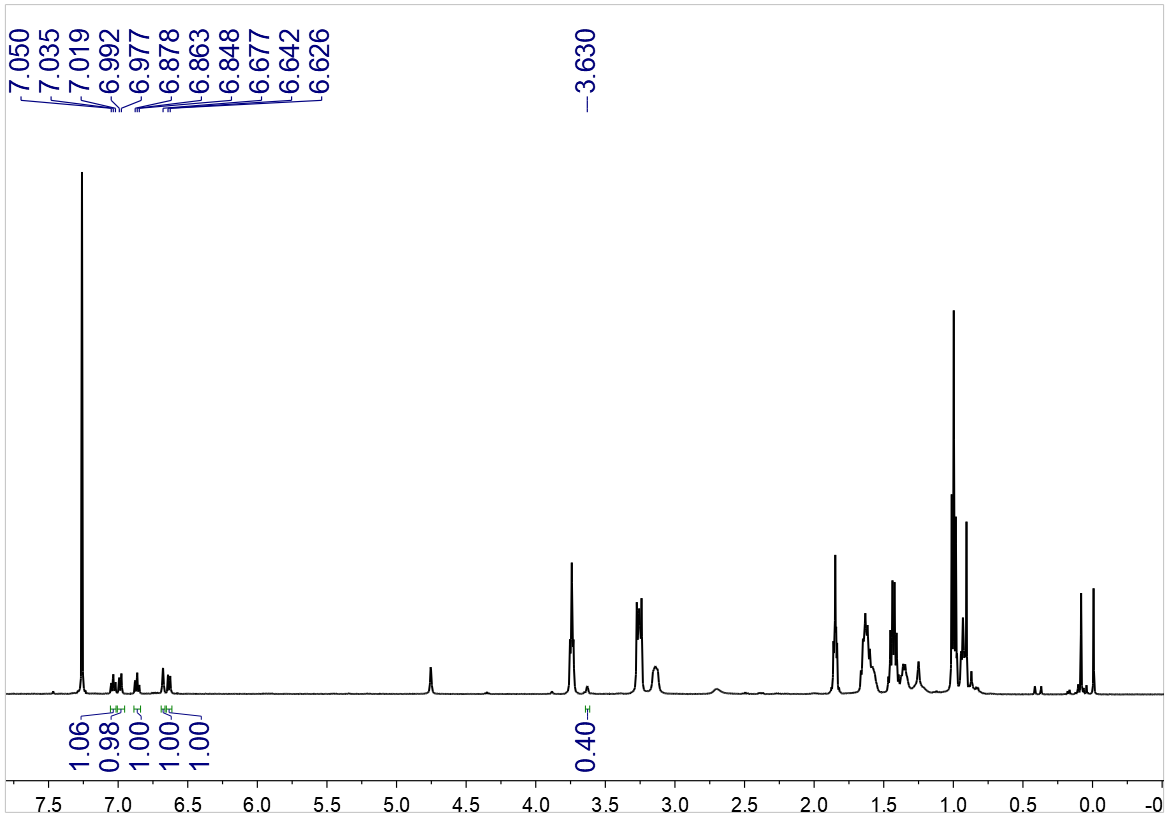


**Fig. S7.** The 1H NMR spectrum of **148-*d2***


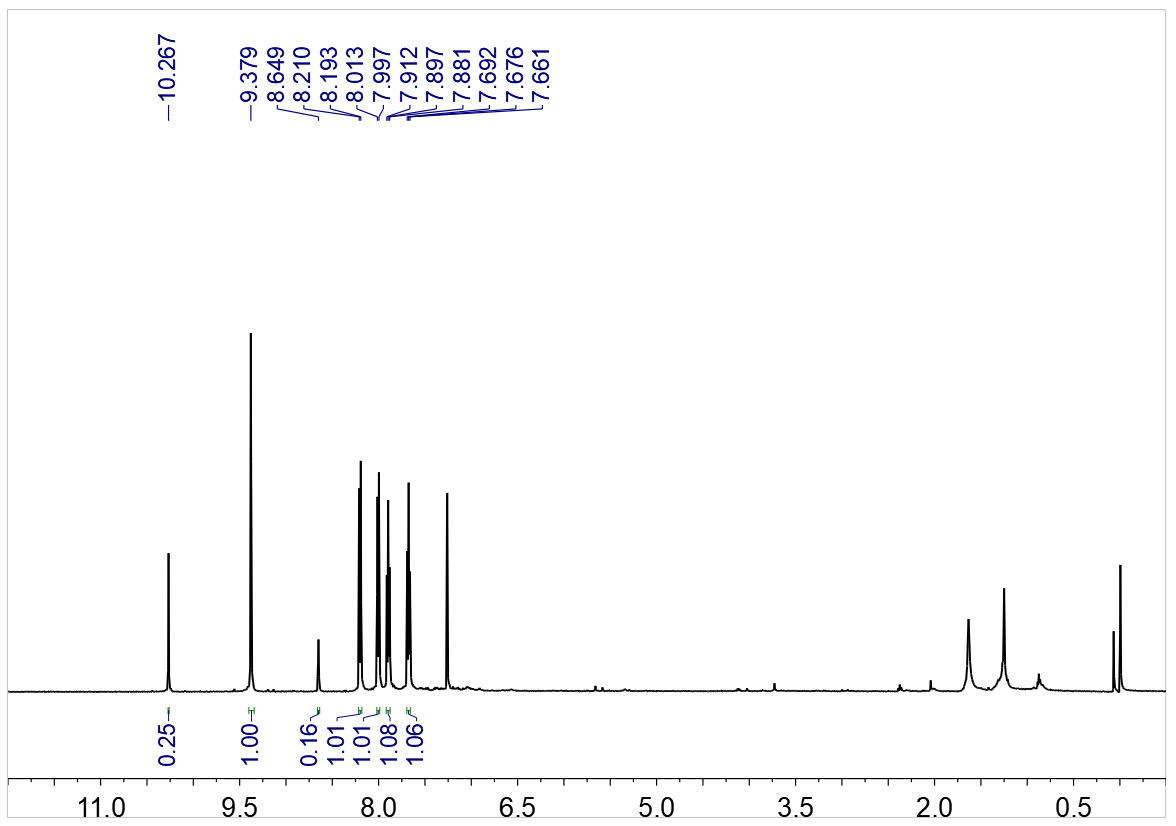


**Fig. S8.** The 1H NMR spectrum of **56-*d***

Compound **147** (31.3 mg, 0.1 mmol, 1.0 equiv.), CsF (18.2 mg, 0.12 mmol, 1.2 equiv.), and H2O (20 equiv.) in DMSO-*d*6 (1.0 mL) were stirred at 25 °C for 10 min under N2 atmosphere. The mixture was directly analyzed by 1H NMR spectroscopy and HRMS. The intermediate **148-*d1*** can be observed in the 1H NMR spectrum of the reaction mixture. And then CsF, H2O and DMSO were added into the reaction mixture, and stired at 40 °C for 5 h under air atmosphere. The deuterated product **56-*d*** can be obtained. The deuterium ratio is shown below.


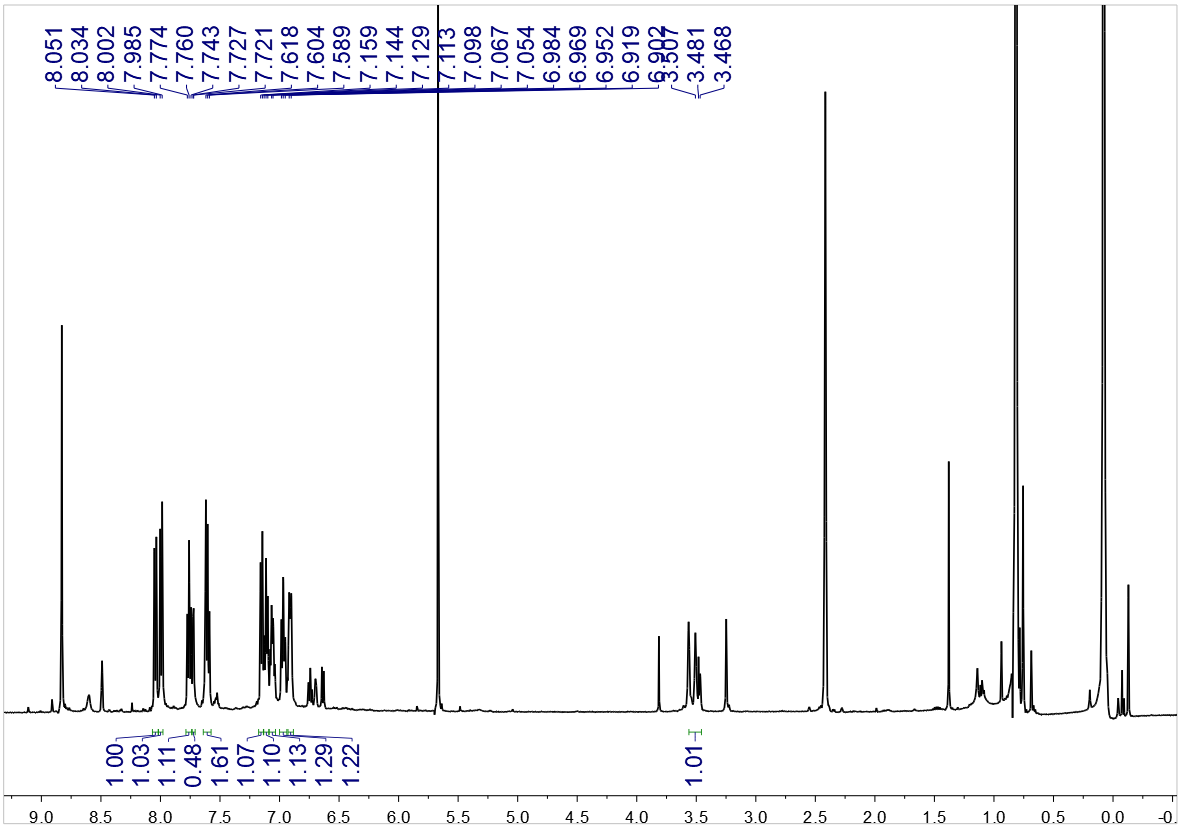


**Fig. S9.** The 1H NMR spectrum of **148-*d1***


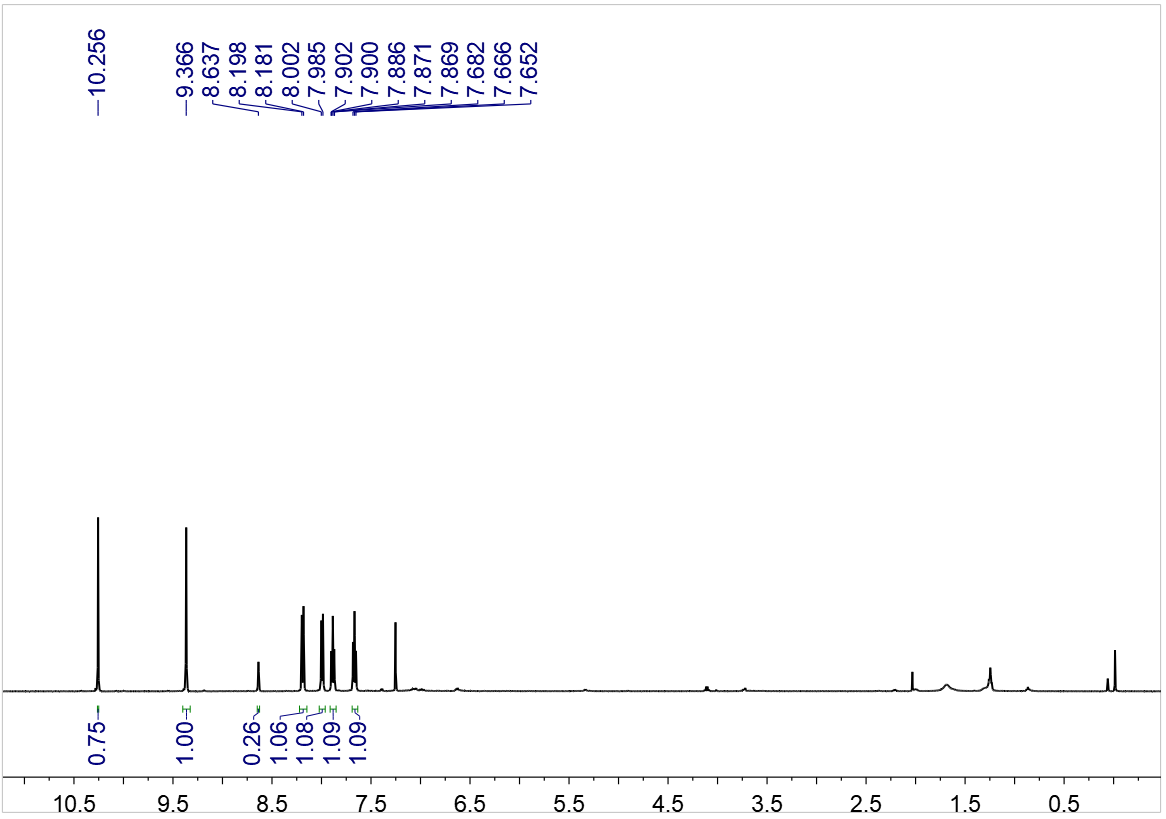


**Fig. S10.** The 1H NMR spectrum of **56-*d***

[17]To a pre-mixed solution of DMSO (3 mL) and D2O (1 mL), 1-(chloromethyl)-4-methylbenzene (281.2 mg, 2.0 mmol), 4-picoline (745.0 mg, 8.0 mmol), K3PO4 (169.6 mg, 8.0 mmol) was added. The resulting mixture was stirred at 50 °C for 10 h. *p*-Nitrosodimethyl aniline (600.7 mg, 4.0 mmol) was then added at room temperature. The mixture was continuous stirred for 4 h at room temperature before slowly poured to stirred HCl (3 N, 12 mL) at 0 °C. The resulting mixture was stirred vigorously for 1 h before extracted with ethyl acetate (10 mL) for 3 times. The combined organic phase was washed with brine and dried with anhydrous Na2SO4. The crude product was vacuo evaporated and purified by flash column chromatography on a silica gel to give corresponding deuterated 4-methylbenzaldehyde (179.1 mg, 74% yield). And then preparing the deuterated *N*-triftosylhydrazone according to the literature.[3]


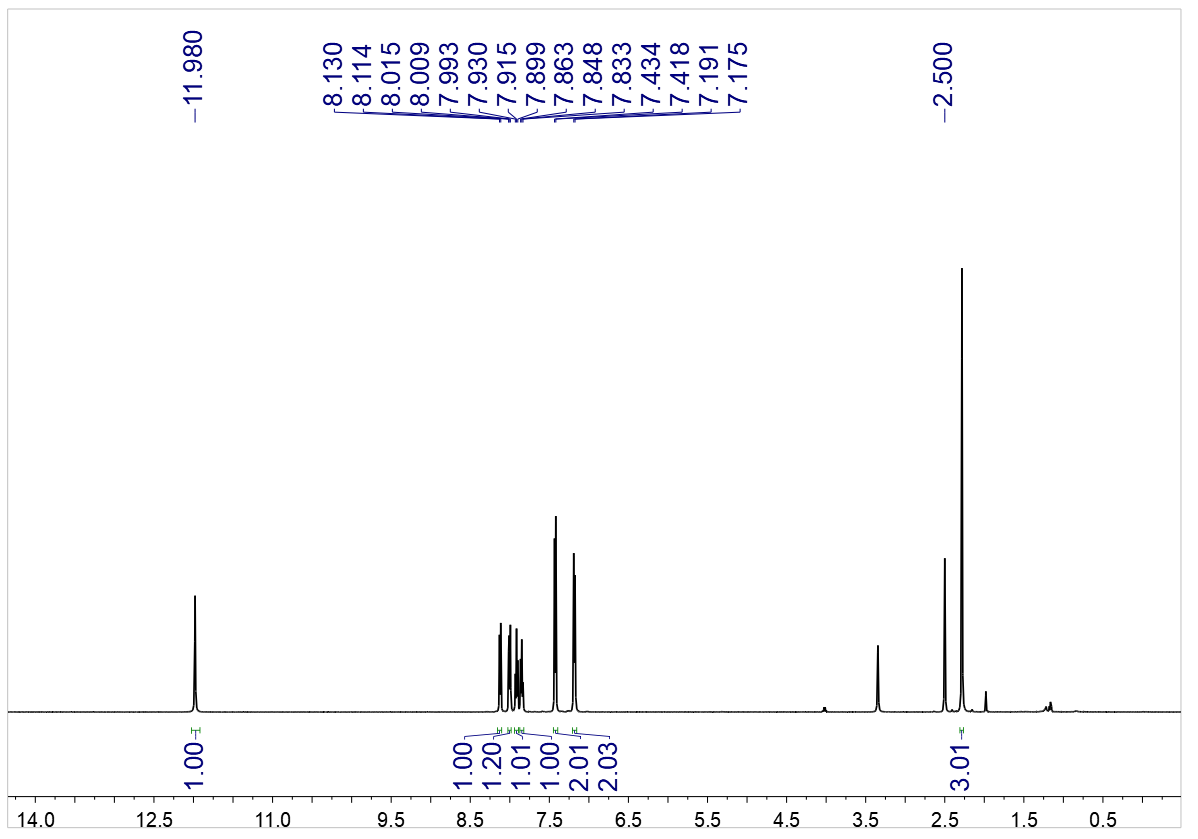


**Fig. S11.** The 1H NMR spectrum of deuterated *N*-sulfonylhydrazone

**1H NMR** (500 MHz, DMSO-*d*6) δ 11.98 (s, 1H), 8.12 (d, *J* = 8.0 Hz, 1H), 8.03-7.96 (m, 2H), 7.91 (t, *J* = 7.5 Hz, 1H), 7.85 (t, *J* = 7.5 Hz, 1H), 7.43 (d, *J* = 8.0 Hz, 2H), 7.18 (d, *J* = 8.0 Hz, 2H), 2.28 (s, 3H).

**Step 1:** **Cyclopropane 70** (33.5 mg, 0.1 mmol, 1.0 equiv.), D2O (20 equiv.) and CsF (18.2 mg, 0.12 mmol, 1.2 equiv.) in DMSO-*d*6 (1.0 mL) were stirred at 25 °C for 10 min under N2 atmosphere. The mixture was directly analyzed by 1H NMR spectroscopy and HRMS. The **Intermediate 70-*d*** can be observed in the 1H NMR spectrum of the reaction mixture. The deuterium ratio is shown below (**Fig. S12**).


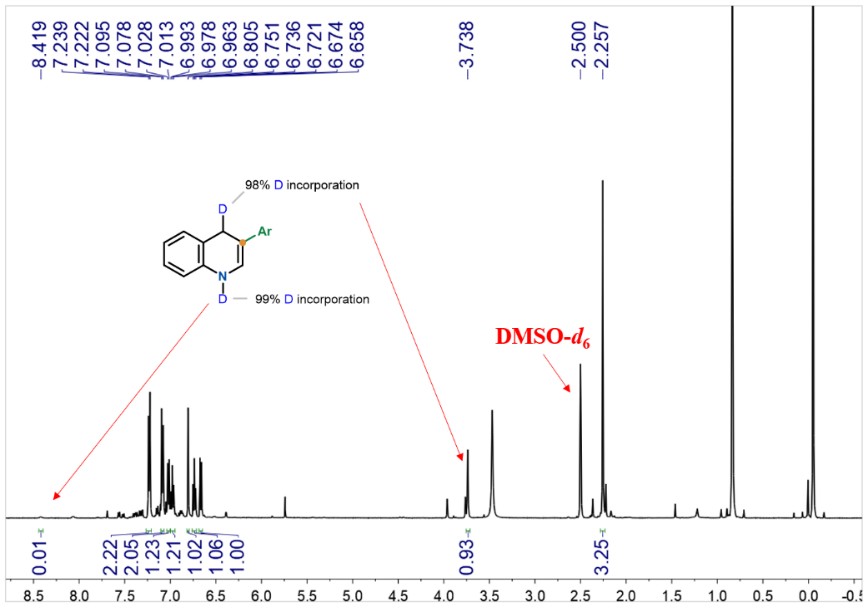


**Fig. S12.** 1H NMR spectrum of Step 1 reaction mixture.

**Step 2:** Then the reaction was continued for an additional 10 min at 25 °C under air atmosphere, and diluted with DCM, washed with brine, dried over anhydrous Na2SO4, filtered and the solvent was evaporated under reduced pressure to leave a crude product. The crude product was purified by flash column chromatography on silica gel (pre-treated with trimethylamine, using petroleum ether-EtOAc as eluent) to give the product **70-*d*** (80% yield). The deuterium ratio is shown below (**Fig. S13**).


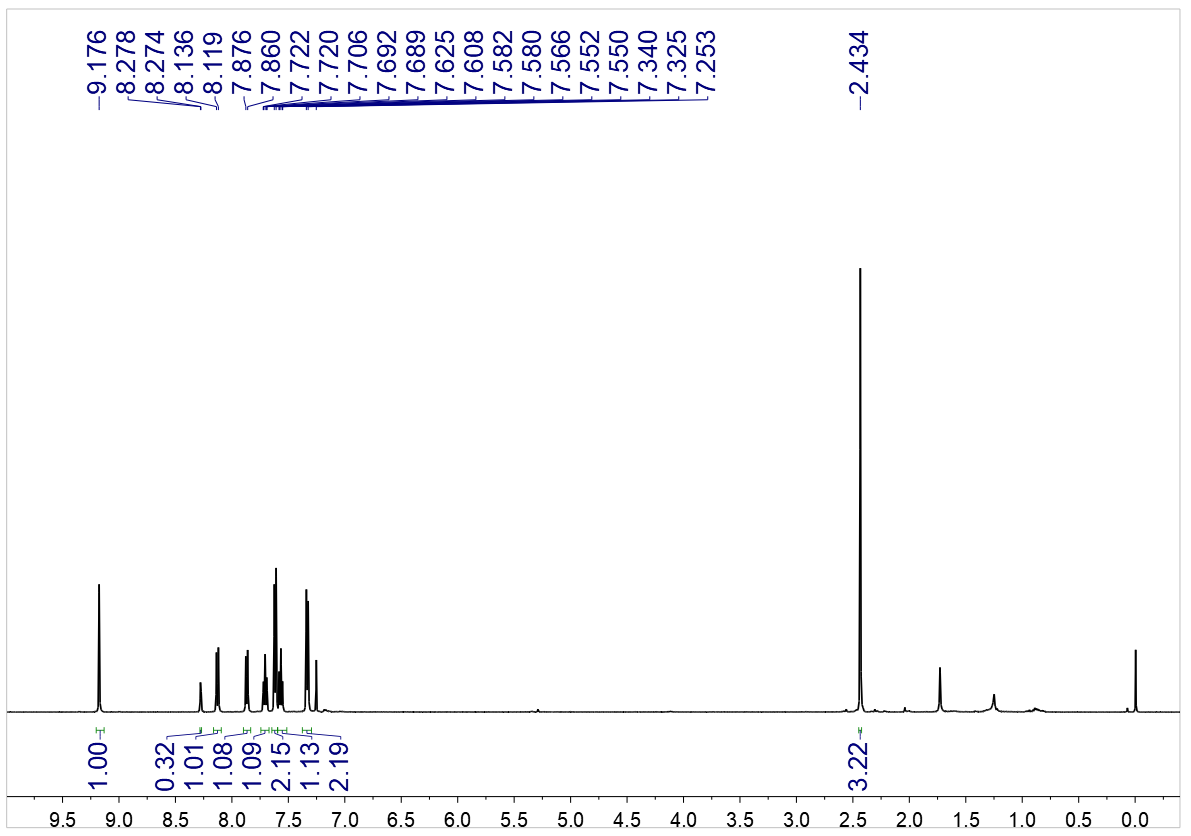


**Fig. S13.** 1H NMR spectrum of **70-*d***.

**Step 1:** To an oven-dried screw-cap reaction tube were added *N*-triftosylhydrazone (102.6 mg, 0.3 mmol, 1.0 equiv.), NaH (24 mg, 0.6 mmol, 2.0 equiv., 60 wt% dispersion in mineral oil), **1-D** (138.6 mg, 0.6 mmol, 2.0 equiv.), TpBr3Ag(THF) (36 mg, 10.0 mol%) and PhCF3 inside a glove box with nitrogen atmosphere. After transfer out of the glove box, the reaction was continued for an additional 12 h at 60 °C and give the **Cyclopropane 70-*d*** (97% yield). The deuterium ratio is shown below (**Fig. S14**).


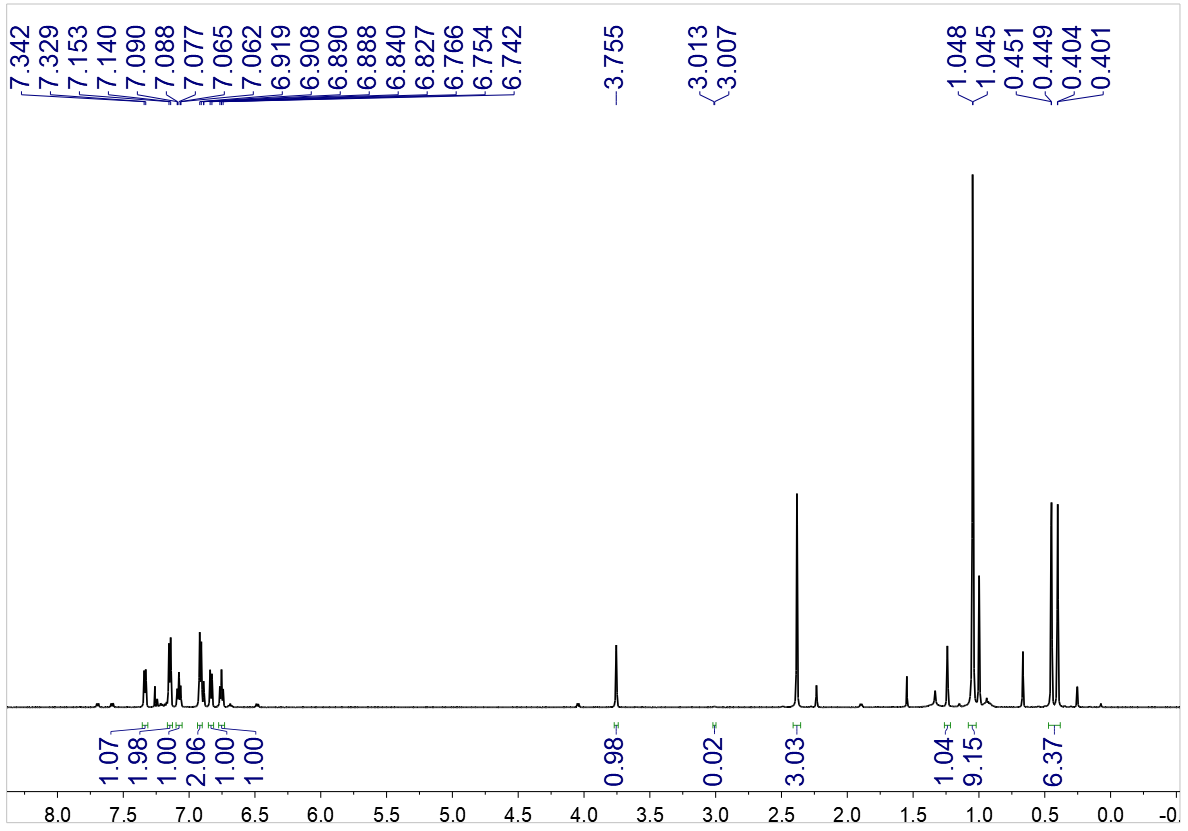


**Fig. S14.** 1H NMR spectrum of **Cyclopropane 70-*d***.

**Step 2:** Then the reaction was continued for an additional 10 min at 25 °C under air atmosphere, and diluted with DCM, washed with brine, dried over anhydrous Na2SO4, filtered and the solvent was evaporated under reduced pressure to leave a crude product. The crude product was purified by flash column chromatography on silica gel (pre-treated with trimethylamine, using petroleum ether-EtOAc as eluent) to give the product **70-*d*** (80% yield). The deuterium ratio is shown below (**Fig. S15**).


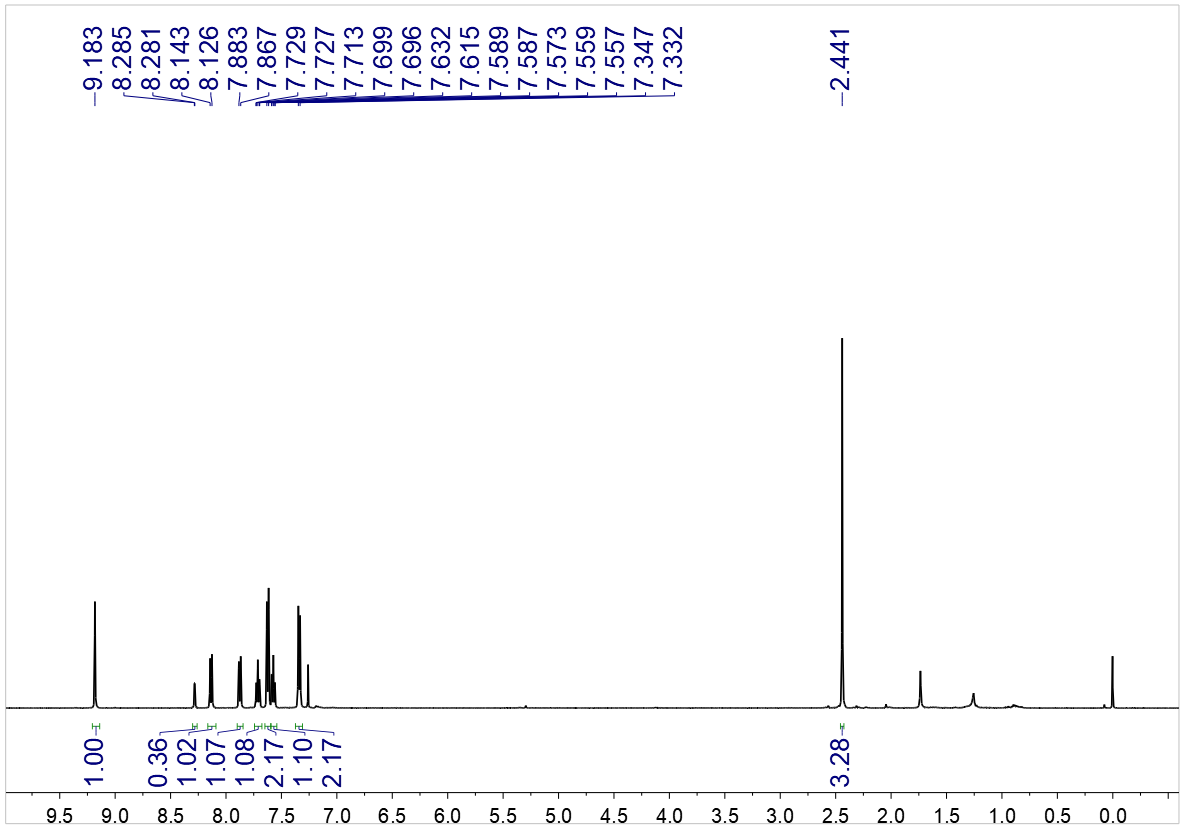


**Fig. S15.** 1H NMR spectrum of **70-*d***.

Compound **149-*d*** (28.5 mg, 0.1 mmol, 1.0 equiv.), TBAF (0.12 mL, 0.12 mmol, 1.2 equiv., 1.0 mol/L in THF) and THF (3.0 mL) were stirred at 25 °C for 10 min under N2 atmosphere. The mixture was directly analyzed by 1H NMR spectroscopy and HRMS. The deuterium ratio of **150** can be observed in the 1H NMR spectrum of the reaction mixture. Then the reaction was continued for an additional 10 min at 25 °C under air atmosphere. The product **70-*d*** (97% yield). The deuterium ratio is shown below (**Fig. S16**).


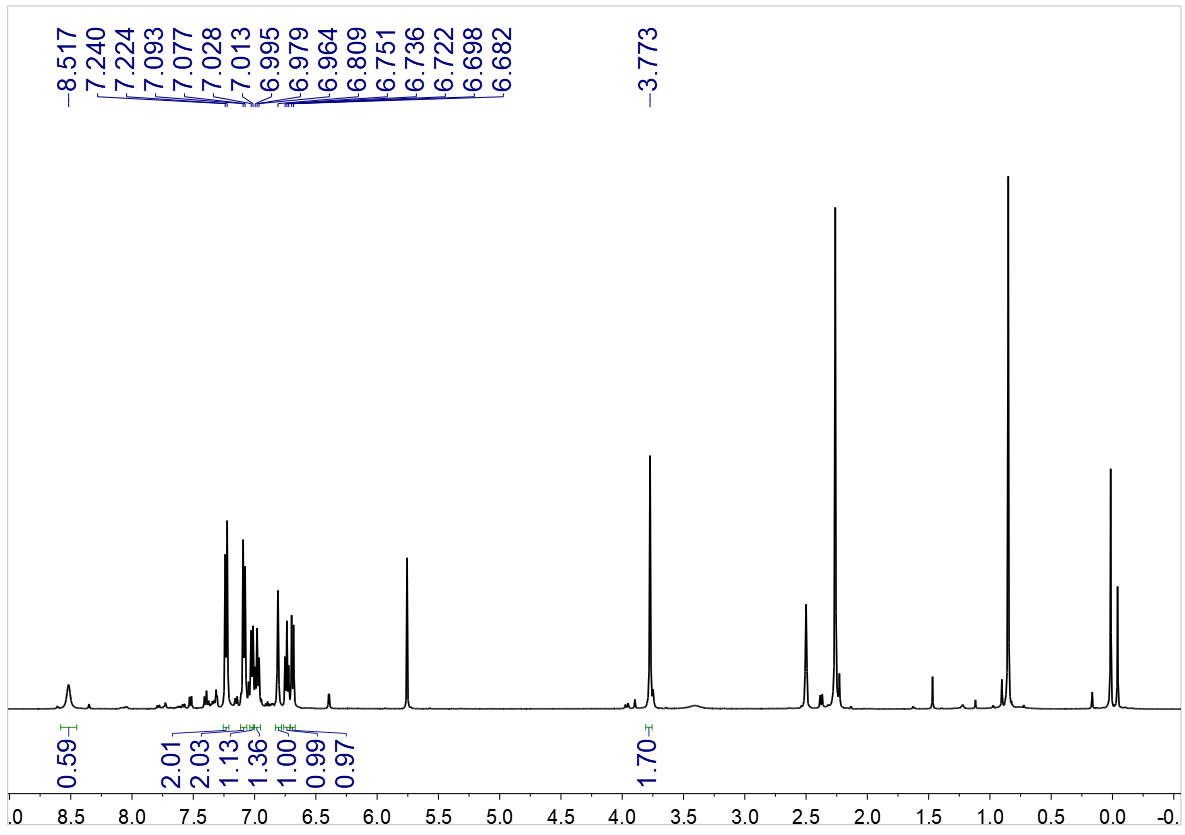


**Fig. S16.** 1H NMR spectrum of **150**.

### 5.1.3 18O-Labeling Experiments

Compound **147** (93.9 mg, 0.3 mmol, 1.0 equiv.), CsF (54.7 mg, 0.36 mmol, 1.2 equiv.), and H218O (20 equiv.) in DMSO (5.0 mL) were stirred at 25 °C for 10 min. After completion of the reaction, the mixture was diluted with DCM, washed with brine, dried over anhydrous Na2SO4, filtered and the solvent was evaporated under reduced pressure to leave a crude product, which was purified by flash column chromatography on silica gel (pre-treated with trimethylamine, using petroleum ether-EtOAc as eluent) to give the product **56-18O**. The product was analyzed by HRMS (**Fig. S17**).

**Fig. S17**. HRMS of **56-18O**, **HRMS** (ESI) m/z, found 160.0630.

## 5.2 Computational Details

All DFT calculations described in this work were carried out with Gaussian16 suite of programs[18]. All geometry optimizations were presented by using the M06 functional[19] by using the SMD solvent model[20]. For *N*-TBS-indole one carbon insertion process with aryl *N*-triftosylhydrazones to form 3-arylquinoline, toluene solvent was used. For *N*-TBS-indole one carbon insertion process with fluoroalkyl *N*-triftosylhydrazones to form 3-formylquinoline, DMSO solvent was used. The Br, Ag and Cs atoms were represented with the effective core potential SDD basis set,[21,22] all the other atoms were described with 6-31G(d,p) basis set.[23-25] Intrinsic Reaction Paths (IRPs)[26,27] were traced from the various transition structures to obtain the connected intermediates. The nature of the local minima was established with analytical frequencies calculations and geometry optimizations were computed without any symmetry constraints. 3D structures of optimized geometries were generated using CYLview visualization software.[28]

**Fig. S18.** (**A)** Comparision of 1,3-H transfer between CF3- and CF2CF3-substituted carbenes. The change in conformation between **Int8** and **TS4'** is larger than that between **Int8-1** and **TS4-1'**, thus the energy barrier for **TS4-1'** is lower than that for **TS4'.** (**B)** Comparision of Michael addition between CF3- and CF2CF3-substituted carbenes. The difference in electronegativity between O and C atoms in **TS4** (Δe = 2.005) is larger than that in **TS4-1** (Δe = 1.489), thus the energy barrier for **TS4** is lower than that for **TS4-1.** Values in e represent NPA charges. Most hydrogen atoms in 3D structures are omitted for clarity.

**Fig. S19.** The comparision of Michael addition and CsF-assisted 1,3-H transfer of intermediate **Int8**.

**Fig. S20.** The comparision of Michael addition and CsF-assisted 1,3-H transfer of intermediate **Int8-1**.

**6. Characterization Data of Products**

**(3) 3-(Trifluoromethyl)quinolone**

Prepared according to **General Procedure A** using TFHZ-Tfs **2** (115.3 mg, 0.36 mmol) and *N*-TBS indole (69.4 mg, 0.3 mmol) afforded **3** (50.9 mg, 86% yield) as a white solid; mp: 38-40 °C.

**1H NMR** (500 MHz, CDCl3) δ 9.10 (d, *J* = 2.0 Hz, 1H), 8.44 (s, 1H), 8.19 (d, *J* = 8.5 Hz, 1H), 7.92 (d, *J* = 8.0 Hz, 1H), 7.88-7.82 (m, 1H), 7.66 (t, *J* = 7.5 Hz, 1H).

13C NMR (150 MHz, CDCl3) δ 149.3, 146.0 (q, *J* = 3.5 Hz), 133.9 (q, *J* = 4.5 Hz), 131.7, 129.6, 128.6, 128.0, 126.2, 123.7 (q, *J* = 271.5 Hz), 123.6 (q, *J* = 33.0 Hz).

**19F NMR** (564 MHz, CDCl3) δ -61.81.

**HRMS** (ESI) m/z calcd. for C10H7F3N+ [M + H]+ 198.0525, found 198.0528.

-----------------------------------------------------------------------------------------------------------------------------------------------------------------------------------------------

**(4)** **4-Methyl-3-(trifluoromethyl)quinolone**

Prepared according to **General Procedure A** using TFHZ-Tfs **2** (115.3 mg, 0.36 mmol) and 1-(*tert*-butyldimethylsilyl)-3-methyl-1*H*-indole (73.6 mg, 0.3 mmol) afforded **4** (12.7 mg, 20% yield) as a white solid; mp: 58-60 °C.

**1H NMR** (500 MHz, CDCl3) δ 9.07 (s, 1H), 8.17 (t, *J* = 7.5 Hz, 2H), 7.83 (t, *J* = 7.5 Hz, 1H), 7.68 (t, *J* = 7.5 Hz, 1H), 2.87 (s, 3H).

**13C NMR** (150 MHz, CDCl3) δ 149.0, 145.9 (q, *J* = 6.0 Hz), 145.1 (q, *J* = 1.5 Hz), 131.2, 130.3, 127.6, 127.3, 124.32, 124.30 (q, *J* = 273.0 Hz), 121.9 (q, *J* = 30.0 Hz), 14.7 (q, *J* = 1.5 Hz).

**19F NMR** (564 MHz, CDCl3) δ -58.67.

**HRMS** (ESI) m/z calcd. for C11H9F3N+ [M + H]+ 212.0682, found 212.0684.

-----------------------------------------------------------------------------------------------------------------------------------------------------------------------------------------------

**(5) 5-Methyl-3-(trifluoromethyl)quinoline**

Prepared according to **General Procedure A** using TFHZ-Tfs **2** (115.3 mg, 0.36 mmol) and 1-(*tert*-butyldimethylsilyl)-4-methyl-1*H*-indole (73.6 mg, 0.3 mmol) afforded **5** (46.9 mg, 74% yield) as a white solid; mp: 40-42 °C.

**1H NMR** (500 MHz, CDCl3) δ 9.10 (d, *J* = 2.0 Hz, 1H), 8.60 (s, 1H), 8.04 (d, *J* = 8.5 Hz, 1H), 7.77-7.71 (m, 1H), 7.49 (d, *J* = 7.0 Hz, 1H), 2.75 (s, 3H).

**13C NMR** (150 MHz, CDCl3) δ 149.8, 145.6 (q, *J* = 3.0 Hz), 135.7, 131.5, 130.4 (q, *J* = 4.5 Hz), 128.4, 127.8, 125.8, 123.8 (q, *J* = 270.0 Hz), 123.1 (q, *J* = 31.5 Hz), 18.5.

**19F NMR** (564 MHz, CDCl3) δ -61.58.

**HRMS** (ESI) m/z calcd. for C11H9F3N+ [M + H]+ 212.0682, found 212.0684.

-----------------------------------------------------------------------------------------------------------------------------------------------------------------------------------------------

**(6) 6-Methyl-3-(trifluoromethyl)quinoline**

Prepared according to **General Procedure A** using TFHZ-Tfs **2** (115.3 mg, 0.36 mmol) and 1-(*tert*-butyldimethylsilyl)-5-methyl-1*H*-indole (73.6 mg, 0.3 mmol) afforded **6** (53.2 mg, 84% yield) as a white solid; mp: 68-70 °C.

**1H NMR** (500 MHz, CDCl3) δ 9.03 (d, *J* = 2.0 Hz, 1H), 8.35 (s, 1H), 8.07 (d, *J* = 9.0 Hz, 1H), 7.71-7.65 (m, 2H), 2.58 (s, 3H).

**13C NMR** (125 MHz, CDCl3) δ 148.0, 145.1 (q, *J* = 4.5 Hz), 138.2, 134.1, 133.2 (q, *J* = 4.5 Hz), 129.2, 127.3, 126.3, 123.8 (q, *J* = 270.0 Hz), 123.5 (q, *J* = 32.5 Hz), 21.6.

**19F NMR** (470 MHz, CDCl3) δ -61.76.

**HRMS** (ESI) m/z calcd. for C11H9F3N+ [M + H]+ 212.0682, found 212.0683.

-----------------------------------------------------------------------------------------------------------------------------------------------------------------------------------------------

**(7) 7-Methyl-3-(trifluoromethyl)quinoline**

Prepared according to **General Procedure A** using TFHZ-Tfs **2** (115.3 mg, 0.36 mmol) and 1-(*tert*-butyldimethylsilyl)-6-methyl-1*H*-indole (73.6 mg, 0.3 mmol) afforded **7** (55.1 mg, 87% yield) as a white solid; mp: 51-53 °C.

**1H NMR** (500 MHz, CDCl3) δ 9.05 (s, 1H), 8.40 (s, 1H), 7.96 (s, 1H), 7.82 (d, *J* = 8.5 Hz, 1H), 7.50 (d, *J* = 8.5 Hz, 1H), 2.62 (s, 3H).

**13C NMR** (150 MHz, CDCl3) δ 149.6, 146.0 (q, *J* = 3.5 Hz), 142.6, 133.5 (q, *J* = 4.5 Hz), 130.3, 128.6, 128.2, 124.3, 123.8 (q, *J* = 271.5 Hz), 122.7 (q, *J* = 33.0 Hz), 22.0.

**19F NMR** (564 MHz, CDCl3) δ -61.65.

**HRMS** (ESI) m/z calcd. for C11H9F3N+ [M + H]+ 212.0682, found 212.0684.

-----------------------------------------------------------------------------------------------------------------------------------------------------------------------------------------------

**(8) 8-Methyl-3-(trifluoromethyl)quinoline**

Prepared according to **General Procedure A** using TFHZ-Tfs **2** (115.3 mg, 0.36 mmol) and 1-(*tert*-butyldimethylsilyl)-7-methyl-1*H*-indole (73.6 mg, 0.3 mmol) afforded **8** (51.3 mg, 81% yield) as a white solid; mp: 39-41 °C.

**1H NMR** (500 MHz, CDCl3) δ 9.12 (d, *J* = 2.0 Hz, 1H), 8.42 (s, 1H), 7.77 (d, *J* = 8.0 Hz, 1H), 7.70 (d, *J* = 7.0 Hz, 1H), 7.55 (t, *J* = 7.5 Hz, 1H), 2.84 (s, 3H).

**13C NMR** (150 MHz, CDCl3) δ 148.4, 144.8 (q, *J* = 3.0 Hz), 137.6, 134.1 (q, *J* = 4.5 Hz), 131.8, 127.8, 126.6, 126.3, 123.8 (q, *J* = 270.0 Hz), 123.3 (q, *J* = 31.5 Hz), 18.0.

**19F NMR** (564 MHz, CDCl3) δ -61.77.

**HRMS** (ESI) m/z calcd. for C11H9F3N+ [M + H]+ 212.0682, found 212.0684.

-----------------------------------------------------------------------------------------------------------------------------------------------------------------------------------------------

**(9) Methyl 3-(trifluoromethyl)quinoline-6-carboxylate**

Prepared according to **General Procedure A** using TFHZ-Tfs **2** (115.3 mg, 0.36 mmol) and methyl 1-(*tert*-butyldimethylsilyl)-1*H*-indole-5-carboxylate (86.8 mg, 0.3 mmol) afforded **9** (69.8 mg, 91% yield) as a white solid; mp: 102-104 °C.

**1H NMR** (500 MHz, CDCl3) δ 9.17 (d, *J* = 2.0 Hz, 1H), 8.68 (d, *J* = 1.5 Hz, 1H), 8.54 (s, 1H), 8.42 (dd, *J* = 9.0, 2.0 Hz, 1H), 8.22 (d, *J* = 9.0 Hz, 1H), 4.01 (s, 3H).

**13C NMR** (150 MHz, CDCl3) δ 166.0, 151.0, 148.1 (q, *J* = 3.0 Hz), 135.1 (q, *J* = 4.5 Hz), 131.5, 131.2, 130.0, 129.6, 125.5, 124.4 (q, *J* = 33.0 Hz), 123.4 (q, *J* = 271.5 Hz), 52.6.

**19F NMR** (564 MHz, CDCl3) δ -62.00.

**HRMS** (ESI) m/z calcd. for C12H9F3NO2+ [M + H]+ 256.0580, found 256.0578.

-----------------------------------------------------------------------------------------------------------------------------------------------------------------------------------------------

**(10) 1-(3-(Trifluoromethyl)quinolin-6-yl)ethan-1-one**

Prepared according to **General Procedure A** using TFHZ-Tfs **2** (115.3 mg, 0.36 mmol) and 1-(1-(*tert*-butyldimethylsilyl)-1*H*-indol-5-yl)ethan-1-one (82.0 mg, 0.3 mmol) afforded **10** (45.9 mg, 64% yield) as a white solid; mp: 87-89 °C.

**1H NMR** (500 MHz, CDCl3) δ 9.20 (d, *J* = 2.0 Hz, 1H), 8.60-8.54 (m, 2H), 8.41 (dd, *J* = 9.0, 2.0 Hz, 1H), 8.26 (d, *J* = 9.0 Hz, 1H), 2.77 (s, 3H).

**13C NMR** (150 MHz, CDCl3) δ 196.8, 151.1, 148.2 (q, *J* = 3.0 Hz), 136.1, 135.3 (q, *J* = 3.0 Hz), 130.3, 130.0, 125.6, 124.6 (q, *J* = 33.0 Hz), 123.4 (q, *J* = 270.0 Hz), 26.8.

**19F NMR** (564 MHz, CDCl3) δ -61.97.

**HRMS** (ESI) m/z calcd. for C12H9F3NO+ [M + H]+ 240.0631, found 240.0632.

-----------------------------------------------------------------------------------------------------------------------------------------------------------------------------------------------

**(11) 6-Bromo-3-(trifluoromethyl)quinoline**

Prepared according to **General Procedure A** using TFHZ-Tfs **2** (115.3 mg, 0.36 mmol) and 5-bromo-1-(*tert*-butyldimethylsilyl)-1*H*-indole (93.1 mg, 0.3 mmol) afforded **11** (161.8 mg, 92% yield) as a white solid; mp: 89-91 °C.

**1H NMR** (500 MHz, CDCl3) δ 9.10 (d, *J* = 1.5 Hz, 1H), 8.36 (s, 1H), 8.10 (d, *J* = 1.5 Hz, 1H), 8.06 (d, *J* = 9.0 Hz, 1H), 7.93 (dd, *J* = 9.0, 2.0 Hz, 1H).

**13C NMR** (150 MHz, CDCl3) δ 148.0, 146.4 (q, *J* = 3.0 Hz), 135.3, 132.9 (q, *J* = 4.5 Hz), 131.3, 130.5, 127.4, 124.7 (q, *J* = 33.0 Hz), 123.4 (q, *J* = 270.0 Hz), 122.1.

**19F NMR** (564 MHz, CDCl3) δ -62.00.

**HRMS** (ESI) m/z calcd. for C10H6BrF3N+ [M + H]+ 275.9630, found 275.9631.

-----------------------------------------------------------------------------------------------------------------------------------------------------------------------------------------------

**(12)** **6-Methoxy-3-(trifluoromethyl)quinoline**

Prepared according to **General Procedure A** using TFHZ-Tfs **2** (115.3 mg, 0.36 mmol) and 1-(*tert*-butyldimethylsilyl)-5-methoxy-1*H*-indole (78.4 mg, 0.3 mmol) afforded **12** (49.1 mg, 72% yield) as a white solid; mp: 38-40 °C.

**1H NMR** (500 MHz, CDCl3) δ 8.93 (d, *J* = 1.0 Hz, 1H), 8.31 (s, 1H), 8.05 (d, *J* = 9.5 Hz, 1H), 7.48 (dd, *J* = 9.0, 2.5 Hz, 1H), 7.13 (d, *J* = 2.5 Hz, 1H), 3.94 (s, 3H).

**13C NMR** (150 MHz, CDCl3) δ 158.8, 145.6, 143.5 (q, *J* = 3.0 Hz), 132.4 (q, *J* = 4.5 Hz), 131.0, 127.5, 124.7, 123.9 (q, *J* = 33.0 Hz), 123.8 (q, *J* = 271.5 Hz), 105.6, 55.6.

**19F NMR** (564 MHz, CDCl3) δ -61.81.

**HRMS** (ESI) m/z calcd. for C11H9F3NO+ [M + H]+ 228.0631, found 228.0630.

-----------------------------------------------------------------------------------------------------------------------------------------------------------------------------------------------

**(13) *tert*-Butyl (3-(trifluoromethyl)quinolin-6-yl)carbamate**

Prepared acording to **General Procedure A** using TFHZ-Tfs **2** (115.3 mg, 0.36 mmol) and *tert*-butyl (1-(*tert*-butyldimethylsilyl)-1*H*-indol-5-yl)carbamate (104.0 mg, 0.3 mmol) afforded **13** (54.3 mg, 58% yield) as a white solid; mp: 145-147 °C.

**1H NMR** (500 MHz, CDCl3) δ 8.96 (d, *J* = 1.5 Hz, 1H), 8.34 (s, 1H), 8.21 (s, 1H), 8.07 (d, *J* = 9.0 Hz, 1H), 7.61 (dd, *J* = 9.0, 2.5 Hz, 1H), 6.97 (s, 1H), 1.55 (s, 9H).

**13C NMR** (150 MHz, CDCl3) δ 152.5, 146.0, 144.4 (q, *J* = 3.0 Hz), 137.7, 133.2 (q, *J* = 4.5 Hz), 130.3, 127.2, 124.6, 124.1 (q, *J* = 33.0 Hz), 123.7 (q, *J* = 271.5 Hz), 114.1, 81.4, 28.3.

**19F NMR** (564 MHz, CDCl3) δ -61.93.

**HRMS** (ESI) m/z calcd. for C15H16F3N2O2+ [M + H]+ 313.1158, found 313.1155.

-----------------------------------------------------------------------------------------------------------------------------------------------------------------------------------------------

**(14) 6-Phenyl-3-(trifluoromethyl)quinoline**

Prepared according to **General Procedure A** using TFHZ-Tfs **2** (115.3 mg, 0.36 mmol) and 1-(*tert*-butyldimethylsilyl)-5-phenyl-1*H*-indole (92.3 mg, 0.3 mmol) afforded **14** (71.3 mg, 87% yield) as a white solid; mp: 72-74 °C.

**1H NMR** (600 MHz, CDCl3) δ 9.10 (d, *J* = 1.8 Hz, 1H), 8.49 (s, 1H), 8.25 (d, *J* = 8.4 Hz, 1H), 8.11 (dd, *J* = 8.4, 1.8 Hz, 1H), 8.08 (d, *J* = 1.8 Hz, 1H), 7.74-7.69 (m, 2H), 7.55-7.49 (m, 2H), 7.47-7.42 (m, 1H).

**13C NMR** (150 MHz, CDCl3) δ 148.7, 145.9 (q, *J* = 3.0 Hz), 140.8, 139.5, 134.0 (q, *J* = 4.5 Hz), 131.5, 130.0, 129.1, 128.2, 127.4, 126.5, 126.0, 123.9 (q, *J* = 33.0 Hz), 123.7 (q, *J* = 270.0 Hz).

**19F NMR** (564 MHz, CDCl3) δ -61.80.

**HRMS** (ESI) m/z calcd. for C16H11F3N+ [M + H]+ 274.0838, found 274.0840.

-----------------------------------------------------------------------------------------------------------------------------------------------------------------------------------------------

**(15) 6-(Pyridin-2-yl)-3-(trifluoromethyl)quinoline**

Prepared according to **General Procedure A** using TFHZ-Tfs **2** (115.3 mg, 0.36 mmol) and 1-(*tert*-butyldimethylsilyl)-5-(pyridin-2-yl)-1*H*-indole (92.6 mg, 0.3 mmol) afforded **15** (25.5 mg, 31% yield) as a white solid; mp: 118-120 °C.

**1H NMR** (500 MHz, CDCl3) δ 9.10 (d, *J* = 1.0 Hz, 1H), 8.76 (d, *J* = 4.5 Hz, 1H), 8.56 (s, 1H), 8.54-8.47 (m, 2H), 8.26 (d, *J* = 9.0 Hz, 1H), 7.88 (d, *J* = 8.0 Hz, 1H), 7.85-7.79 (m, 1H), 7.34-7.28 (m, 1H).

**13C NMR** (125 MHz, CDCl3) δ 155.6, 150.0, 149.5, 146.4 (q, *J* = 3.8 Hz), 138.8, 137.1, 134.5 (q, *J* = 3.8 Hz), 130.5, 130.0, 126.6, 126.4, 124.0 (q, *J* = 32.5 Hz), 123.6 (q, *J* = 270.0 Hz), 122.9, 120.9.

**19F NMR** (470 MHz, CDCl3) δ -61.86.

**HRMS** (ESI) m/z calcd. for C15H10F3N2+ [M + H]+ 275.0791, found 275.0792.

-----------------------------------------------------------------------------------------------------------------------------------------------------------------------------------------------

**(16) 6-(Allyloxy)-3-(trifluoromethyl)quinoline**

Prepared according to **General Procedure A** using TFHZ-Tfs **2** (115.3 mg, 0.36 mmol) and 5-(allyloxy)-1-(*tert*-butyldimethylsilyl)-1*H*-indole (86.2 mg, 0.3 mmol) afforded **16** (63.7 mg, 84% yield) as a white solid; mp: 43-45 °C.

**1H NMR** (500 MHz, CDCl3) δ 8.94 (d, *J* = 1.5 Hz, 1H), 8.31 (s, 1H), 8.08 (d, *J* = 9.0 Hz, 1H), 7.53 (dd, *J* = 9.0, 2.5 Hz, 1H), 7.16 (d, *J* = 2.5 Hz, 1H), 6.17-6.05 (m, 1H), 5.52-5.46 (m, 1H), 5.38-5.34 (m, 1H), 4.70-4.65 (m, 2H).

**13C NMR** (150 MHz, CDCl3) δ 157.7, 145.6, 143.6 (q, *J* = 3.0 Hz), 132.5 (q, *J* = 4.5 Hz), 132.4, 131.0, 127.5, 125.0, 123.9 (q, *J* = 33.0 Hz), 123.8 (q, *J* = 271.5 Hz), 118.3, 106.8, 69.2.

**19F NMR** (564 MHz, CDCl3) δ -61.79.

**HRMS** (ESI) m/z calcd. for C13H11F3NO+ [M + H]+ 254.0787, found 254.0789.

-----------------------------------------------------------------------------------------------------------------------------------------------------------------------------------------------

**(17) 6-(Phenylethynyl)-3-(trifluoromethyl)quinoline**

Prepared according to **General Procedure A** using TFHZ-Tfs **2** (115.3 mg, 0.36 mmol) and 1-(*tert*-butyldimethylsilyl)-5-(phenylethynyl)-1*H*-indole (99.5 mg, 0.3 mmol) afforded **17** (79.3 mg, 89% yield) as a white solid; mp: 110-112 °C.

**1H NMR** (500 MHz, CDCl3) δ 9.08 (s, 1H), 8.39 (s, 1H), 8.15 (d, *J* = 9.0 Hz, 1H), 8.09 (s, 1H), 7.94 (d, *J* = 8.0 Hz, 1H), 7.63-7.55 (m, 2H), 7.44-7.34 (m, 3H).

13C NMR (125 MHz, CDCl3) δ 148.6, 146.4 (q, *J* = 3.8 Hz), 134.4, 133.5 (q, *J* = 3.8 Hz), 131.8, 131.5, 129.7, 128.9, 128.5, 126.1, 124.3 (q, *J* = 32.5 Hz), 123.5 (q, *J* = 270.0 Hz), 123.3, 122.5, 91.9, 88.2.

**19F NMR** (470 MHz, CDCl3) δ -61.92.

**HRMS** (ESI) m/z calcd. for C18H11F3N+ [M + H]+ 298.0838, found 298.0840.

-----------------------------------------------------------------------------------------------------------------------------------------------------------------------------------------------

**(18) 5-Chloro-3-(trifluoromethyl)quinoline**

Prepared according to **General Procedure A** using TFHZ-Tfs **2** (115.3 mg, 0.36 mmol) and 1-(*tert*-butyldimethylsilyl)-4-chloro-1*H*-indole (79.8 mg, 0.3 mmol) afforded **18** (43.6 mg, 63% yield) as a white solid; mp: 33-35 °C.

**1H NMR** (500 MHz, CDCl3) δ 9.14 (d, *J* = 2.0 Hz, 1H), 8.86 (s, 1H), 8.12 (d, *J* = 8.0 Hz, 1H), 7.78 (t, *J* = 8.0 Hz, 1H), 7.76-7.72 (m, 1H).

**13C NMR** (150 MHz, CDCl3) δ 150.0, 146.7 (q, *J* = 3.0 Hz), 132.2, 131.5, 131.1 (q, *J* = 4.5 Hz), 128.8, 128.0, 124.7, 124.5 (q, *J* = 34.5 Hz), 123.5 (q, *J* = 271.5 Hz).

**19F NMR** (564 MHz, CDCl3) δ -61.82.

**HRMS** (ESI) m/z calcd. for C10H6ClF3N+ [M + H]+ 232.0135, found 232.0130.

-----------------------------------------------------------------------------------------------------------------------------------------------------------------------------------------------

**(19) 7-Iodo-3-(trifluoromethyl)quinoline**

Prepared according to **General Procedure A** using TFHZ-Tfs **2** (115.3 mg, 0.36 mmol) and 1-(*tert*-butyldimethylsilyl)-6-iodo-1*H*-indole (107.2 mg, 0.3 mmol) afforded **19** (82.4 mg, 85% yield) as a white solid; mp: 74-76 °C.

**1H NMR** (600 MHz, CDCl3) δ 9.10 (d, *J* = 1.8 Hz, 1H), 8.333 (s, 1H), 8.331 (s, 1H), 8.09 (dd, *J* = 9.0, 1.8 Hz, 1H), 7.91 (d, *J* = 8.0 Hz, 1H).

**13C NMR** (150 MHz, CDCl3) δ 148.3, 146.5 (q, *J* = 3.0 Hz), 140.5, 137.2, 132.7 (q, *J* = 4.5 Hz), 131.2, 127.9, 124.3 (q, *J* = 33.0 Hz), 123.4 (q, *J* = 270.0 Hz), 93.8.

**19F NMR** (564 MHz, CDCl3) δ -61.97.

**HRMS** (ESI) m/z calcd. for C10H16F3IN+ [M + H]+ 323.9492, found 323.9495.

-----------------------------------------------------------------------------------------------------------------------------------------------------------------------------------------------

**(20) 7-(Benzyloxy)-3-(trifluoromethyl)quinoline**

Prepared according to **General Procedure A** using TFHZ-Tfs **2** (115.3 mg, 0.36 mmol) and 6-(benzyloxy)-1-(*tert*-butyldimethylsilyl)-1*H*-indole (101.3 mg, 0.3 mmol) afforded **20** (76.4 mg, 84% yield) as a white solid; mp: 93-95 °C.

**1H NMR** (500 MHz, CDCl3) δ 9.02 (s, 1H), 8.34 (s, 1H), 7.80 (d, *J* = 9.0 Hz, 1H), 7.56 (s, 1H), 7.50 (d, *J* = 7.5 Hz, 2H), 7.42 (t, *J* = 7.5 Hz, 2H), 7.40-7.32 (m, 2H), 5.24 (s, 2H).

**13C NMR** (150 MHz, CDCl3) δ 161.5, 151.3, 146.3 (q, *J* = 3.0 Hz), 135.9, 133.4 (q, *J* = 4.5 Hz), 129.6, 128.7, 128.3, 127.7, 123.9 (q, *J* = 270.0 Hz), 121.7, 121.6 (q, *J* = 33.0 Hz), 121.5, 108.6, 70.4.

**19F NMR** (564 MHz, CDCl3) δ -61.39.

**HRMS** (ESI) m/z calcd. for C17H13F3NO+ [M + H]+ 304.0944, found 304.0946.

-----------------------------------------------------------------------------------------------------------------------------------------------------------------------------------------------

**(21)** **8-Fluoro-3-(trifluoromethyl)quinoline**

Prepared according to **General Procedure A** using TFHZ-Tfs **2** (115.3 mg, 0.36 mmol) and 1-(*tert*-butyldimethylsilyl)-7-fluoro-1*H*-indole (74.8 mg, 0.3 mmol) afforded **21** (52.2 mg, 81% yield) as a white solid; mp: 42-44 °C.

**1H NMR** (500 MHz, CDCl3) δ 9.06 (s, 1H), 8.40 (s, 1H), 8.20 (dd, *J* = 9.0, 5.0 Hz, 1H), 7.63 (td, *J* = 9.0, 2.5 Hz, 1H), 7.55 (dd, *J* = 8.5, 2.5 Hz, 1H).

**13C NMR** (150 MHz, CDCl3) δ 161.1 (d, *J* = 249.0 Hz), 146.5, 145.5-145.2 (m), 133.4-133.1 (m), 132.3 (d, *J* = 9.0 Hz), 127.1 (d, *J* = 10.5 Hz), 124.4 (q, *J* = 31.5 Hz), 123.5 (q, *J* = 271.5 Hz), 122.2 (d, *J* = 25.5 Hz), 111.6 (d, *J* = 22.5 Hz).

**19F NMR** (564 MHz, CDCl3) δ -61.97, (-110.50)-(-110.57) (m).

**HRMS** (ESI) m/z calcd. for C10H6F4N+ [M + H]+ 216.0431, found 216.0433.

-----------------------------------------------------------------------------------------------------------------------------------------------------------------------------------------------

**(22) 7-Bromo-6-fluoro-3-(trifluoromethyl)quinoline**

Prepared according to **General Procedure A** using TFHZ-Tfs **2** (115.3 mg, 0.36 mmol) and 6-bromo-1-(*tert*-butyldimethylsilyl)-5-fluoro-1*H*-indole (98.5 mg, 0.3 mmol) afforded **22** (72.7 mg, 83% yield) as a white solid; mp: 92-94 °C.

**1H NMR** (500 MHz, CDCl3) δ 9.06 (s, 1H), 8.46 (d, *J* = 6.5 Hz, 1H), 8.38 (s, 1H), 7.61 (d, *J* = 8.0 Hz, 1H).

**13C NMR** (125 MHz, CDCl3) δ 157.4 (d, *J* = 251.3 Hz), 146.5, 146.4-146.2 (m), 135.0, 133.2-133.0 (m), 126.1 (d, *J* = 8.8 Hz), 124.6 (q, *J* = 33.8 Hz), 123.3 (q, *J* = 271.3 Hz), 116.3 (d, *J* = 23.8 Hz), 112.3 (d, *J* = 23.8 Hz).

**19F NMR** (470 MHz, CDCl3) δ -62.07, -105.37 (t, *J* = 7.5 Hz).

**HRMS** (ESI) m/z calcd. for C10H5BrF4N+ [M + H]+ 293.9536, found 293.9539.

-----------------------------------------------------------------------------------------------------------------------------------------------------------------------------------------------

**(23) Methyl 5-(3-(trifluoromethyl)quinolin-6-yl)furan-3-carboxylate**

Prepared according to **General Procedure A** using TFHZ-Tfs **2** (115.3 mg, 0.36 mmol) and methyl 5-(1-(*tert*-butyldimethylsilyl)-1*H*-indol-5-yl)furan-3-carboxylate (106.7 mg, 0.3 mmol) afforded **23** (81.0 mg, 84% yield) as a white solid; mp: 152-154 °C.

**1H NMR** (500 MHz, CDCl3) δ 9.05 (d, *J* = 1.5 Hz, 1H), 8.43 (s, 1H), 8.20-8.15 (m, 2H), 8.12-8.06 (m, 2H), 7.16 (s, 1H), 3.89 (s, 3H).

**13C NMR** (150 MHz, CDCl3) δ 163.1, 153.6, 148.9, 147.7, 146.1 (q, *J* = 3.0 Hz), 133.9 (q, *J* = 4.5 Hz), 130.3, 129.1, 127.9, 126.5, 124.4 (q, *J* = 33.0 Hz), 123.5 (q, *J* = 271.5 Hz), 122.8, 121.4, 106.7, 51.9.

**19F NMR** (564 MHz, CDCl3) δ -61.98.

**HRMS** (ESI) m/z calcd. for C16H11F3NO3+ [M + H]+ 322.0686, found 322.0690.

-----------------------------------------------------------------------------------------------------------------------------------------------------------------------------------------------

**(24) 3,7-Dimethylocta-2,6-dien-1-yl 3-(trifluoromethyl)quinoline-7-carboxylate**

Prepared according to **General Procedure A** using TFHZ-Tfs **2** (115.3 mg, 0.36 mmol) and 3,7-dimethylocta-2,6-dien-1-yl 1-(*tert*-butyldimethylsilyl)-1*H*-indole-6-carboxylate (123.5 mg, 0.3 mmol) afforded **24** (84.9 mg, 75% yield) as a white solid; mp: 38-40 °C.

**1H NMR** (500 MHz, CDCl3) δ 9.14 (s, 1H), 8.87 (s, 1H), 8.45 (s, 1H), 8.24 (d, *J* = 8.5 Hz, 1H), 7.96 (d, *J* = 8.5 Hz, 1H), 5.51 (t, *J* = 6.5 Hz, 1H), 5.08 (t, *J* = 6.0 Hz, 1H), 4.92 (d, *J* = 7.0 Hz, 2H), 2.18-2.03 (m, 4H), 1.79 (s, 3H), 1.65 (s, 3H), 1.59 (s, 3H).

**13C NMR** (150 MHz, CDCl3) δ 165.6, 148.8, 146.8 (q, *J* = 3.0 Hz), 143.1, 133.6 (q, *J* = 4.5 Hz), 133.5, 131.9, 131.8, 128.7, 128.4, 127.5, 125.0 (q, *J* = 33.0 Hz), 123.6, 123.3 (q, *J* = 271.5 Hz), 117.9, 62.5, 39.5, 26.2, 25.6, 17.6, 16.5.

**19F NMR** (564 MHz, CDCl3) δ -62.10.

**HRMS** (ESI) m/z calcd. for C21H23F3NO2+ [M + H]+ 378.1675, found 378.1677.

-----------------------------------------------------------------------------------------------------------------------------------------------------------------------------------------------

**(25) (4-(Prop-1-en-2-yl)cyclohex-1-en-1-yl)methyl 3-(trifluoromethyl)quinoline-7-carboxylate**

Prepared according to **General Procedure A** using TFHZ-Tfs **2** (115.3 mg, 0.36 mmol) and (4-(prop-1-en-2-yl)cyclohex-1-en-1-yl)methyl 1-(*tert*-butyldimethylsilyl)-1*H*-indole-6-carboxylate (122.9 mg, 0.3 mmol) afforded **25** (75.5 mg, 67% yield) as a white solid; mp: 57-59 °C.

**1H NMR** (500 MHz, CDCl3) δ 9.17 (d, *J* = 2.0 Hz, 1H), 8.90 (s, 1H), 8.49 (s, 1H), 8.27 (dd, *J* = 8.5, 1.5 Hz, 1H), 8.00 (d, *J* = 8.5 Hz, 1H), 5.91 (s, 1H), 4.85-4.76 (m, 2H), 4.76-4.71 (m, 2H), 2.27-2.16 (m, 4H), 2.07-1.97 (m, 1H), 1.93-1.86 (m, 1H), 1.75 (s, 3H), 1.60-1.49 (m, 1H).

**13C NMR** (150 MHz, CDCl3) δ 165.5, 149.5, 148.8, 146.9 (q, *J* = 3.0 Hz), 133.7 (q, *J* = 4.5 Hz), 133.4, 132.3, 131.9, 128.9, 128.6, 127.6, 126.5, 125.1 (q, *J* = 33.0 Hz), 123.4 (q, *J* = 271.5 Hz), 108.9, 69.7, 40.8, 30.5, 27.3, 26.5, 20.7.

**19F NMR** (564 MHz, CDCl3) δ -62.07.

**HRMS** (ESI) m/z calcd. for C21H21F3NO2+ [M + H]+ 376.1519, found 376.1520.

-----------------------------------------------------------------------------------------------------------------------------------------------------------------------------------------------

**(26) 3-(Difluoromethyl)quinoline**

Prepared according to **General Procedure B** using DFHZ-Tfs (181.3 mg, 0.6 mmol) and *N*-TBS indole (69.4 mg, 0.3 mmol) afforded **26** (47.3 mg, 88% yield) as a white solid; mp: 28-30 °C.

**1H NMR** (500 MHz, CDCl3) δ 9.03 (s, 1H), 8.29 (s, 1H), 8.16 (d, *J* = 8.5 Hz, 1H), 7.89 (d, *J* = 8.0 Hz, 1H), 7.81 (t, *J* = 7.5 Hz, 1H), 7.62 (t, *J* = 8.0 Hz, 1H), 6.88 (t, *J* = 56.0 Hz, 1H).

**13C NMR** (150 MHz, CDCl3) δ 149.1, 147.1 (t, *J* = 6.0 Hz), 133.8 (t, *J* = 7.5 Hz), 131.0, 129.5, 128.3, 127.6, 127.1 (t, *J* = 22.5 Hz), 126.8, 113.7 (t, *J* = 238.5 Hz).

**19F NMR** (564 MHz, CDCl3) δ -111.53 (d, *J* = 56.0 Hz).

**HRMS** (ESI) m/z calcd. for C10H8F2N+ [M + H]+ 180.0619, found 180.0621.

-----------------------------------------------------------------------------------------------------------------------------------------------------------------------------------------------

**(27) 5-Chloro-3-(difluoromethyl)quinoline**

Prepared according to **General Procedure A** using DFHZ-Tfs (181.3 mg, 0.6 mmol) and 1-(*tert*-butyldimethylsilyl)-4-chloro-1*H*-indole (79.8 mg, 0.3 mmol) afforded **27** (45.5 mg, 71% yield) as a white solid; mp: 44-46 °C.

**1H NMR** (500 MHz, CDCl3) δ 9.08 (s, 1H), 8.71 (s, 1H), 8.10 (d, *J* = 8.0 Hz, 1H), 7.77-7.66 (m, 2H), 6.93 (t, *J* = 55.5 Hz, 1H).

**13C NMR** (150 MHz, CDCl3) δ 149.7, 147.8 (t, *J* = 4.5 Hz), 132.0, 131.0 (t, *J* = 7.5 Hz), 130.7, 128.8, 128.0 (t, *J* = 22.5 Hz), 127.6, 125.2, 113.5 (t, *J* = 238.5 Hz).

**19F NMR** (564 MHz, CDCl3) δ -111.63 (d, *J* = 55.5 Hz).

**HRMS** (ESI) m/z calcd. for C10H7ClF2N+ [M + H]+ 214.0230, found 214.0233.

-----------------------------------------------------------------------------------------------------------------------------------------------------------------------------------------------

**(28)** **3-(Difluoromethyl)-6-methoxyquinoline**

Prepared according to **General Procedure B** using DFHZ-Tfs (181.3 mg, 0.6 mmol) and 1-(*tert*-butyldimethylsilyl)-5-methoxy-1*H*-indole (78.4 mg, 0.3 mmol) afforded **28** (50.8 mg, 81% yield) as a white solid; mp: 48-50 °C.

**1H NMR** (500 MHz, CDCl3) δ 8.86 (s, 1H), 8.17 (s, 1H), 8.03 (d, *J* = 9.2 Hz, 1H), 7.44 (dd, *J* = 9.2, 2.5 Hz, 1H), 7.10 (d, *J* = 2.5 Hz, 1H), 6.85 (t, *J* = 56.0 Hz, 1H), 3.93 (s, 3H).

**13C NMR** (150 MHz, CDCl3) δ 158.4, 145.3, 144.5 (t, *J* = 6.0 Hz), 132.4 (t, *J* = 7.5 Hz), 130.8, 128.0, 127.4 (t, *J* = 22.5 Hz), 123.9, 113.8 (t, *J* = 238.5 Hz), 105.4, 55.6.

**19F NMR** (564 MHz, CDCl3) δ -111.56 (d, *J* = 56.0 Hz).

**HRMS** (ESI) m/z calcd. for C11H10F2NO+ [M + H]+ 210.0725, found 210.0728.

-----------------------------------------------------------------------------------------------------------------------------------------------------------------------------------------------

**(29) Methyl 3-(difluoromethyl)quinoline-6-carboxylate**

Prepared according to **General Procedure B** using DFHZ-Tfs (181.3 mg, 0.6 mmol) and methyl 1-(*tert*-butyldimethylsilyl)-1*H*-indole-5-carboxylate (86.8 mg, 0.3 mmol) afforded **29** (69.0 mg, 97% yield) as a white solid; mp: 105-107 °C.

**1H NMR** (500 MHz, CDCl3) δ 9.11 (s, 1H), 8.65 (s, 1H), 8.41-8.36 (m, 2H), 8.20 (d, *J* = 9.0 Hz, 1H), 6.91 (t, *J* = 56.0 Hz, 1H), 4.01 (s, 3H).

**13C NMR** (150 MHz, CDCl3) δ 166.2, 150.8, 149.2 (t, *J* = 4.5 Hz), 135.0 (t, *J* = 7.5 Hz), 131.4, 130.5, 129.9, 129.2, 128.0 (t, *J* = 24.0 Hz), 126.0, 113.3 (t, *J* = 238.5 Hz), 52.6.

**19F NMR** (564 MHz, CDCl3) δ -112.10 (d, *J* = 56.0 Hz).

**HRMS** (ESI) m/z calcd. for C12H10F2NO2+ [M + H]+ 238.0674, found 238.0677.

-----------------------------------------------------------------------------------------------------------------------------------------------------------------------------------------------

**(30) 7-(Benzyloxy)-3-(difluoromethyl)quinoline**

Prepared according to **General Procedure B** using DFHZ-Tfs (181.3 mg, 0.6 mmol) and 6-(benzyloxy)-1-(*tert*-butyldimethylsilyl)-1*H*-indole (101.3 mg, 0.3 mmol) afforded **30** (71.0 mg, 83% yield) as a white solid; mp: 61-63 °C.

**1H NMR** (500 MHz, CDCl3) δ 8.95 (s, 1H), 8.22 (s, 1H), 7.79 (d, *J* = 9.0 Hz, 1H), 7.55 (d, *J* = 2.0 Hz, 1H), 7.50 (d, *J* = 7.5 Hz, 2H), 7.42 (t, *J* = 7.5 Hz, 2H), 7.38-7.33 (m, 2H), 6.86 (t, *J* = 56.0 Hz, 1H), 5.24 (s, 2H).

**13C NMR** (150 MHz, CDCl3) δ 161.0, 151.0, 147.4 (t, *J* = 6.0 Hz), 136.0, 133.5 (t, *J* = 6.0 Hz), 129.4, 128.7, 128.3, 127.7, 125.2 (t, *J* = 22.5 Hz), 122.2, 121.3, 113.9 (t, *J* = 237.0 Hz), 108.6, 70.4.

**19F NMR** (564 MHz, CDCl3) δ -110.71 (d, *J* = 56.0 Hz).

**HRMS** (ESI) m/z calcd. for C17H14F2NO+ [M + H]+ 286.1038, found 286.1041.

-----------------------------------------------------------------------------------------------------------------------------------------------------------------------------------------------

**(31) 3-(Difluoromethyl)-8-fluoroquinoline**

Prepared according to **General Procedure B** using DFHZ-Tfs (181.3 mg, 0.6 mmol) and 1-(*tert*-butyldimethylsilyl)-7-fluoro-1*H*-indole (74.8 mg, 0.3 mmol) afforded **31** (47.3 mg, 80% yield) as a white solid; mp: 71-73 °C.

**1H NMR** (500 MHz, CDCl3) δ 9.08 (s, 1H), 8.35 (s, 1H), 7.71 (d, *J* = 8.0 Hz, 1H), 7.61-7.55 (m, 1H), 7.54-7.47 (m, 1H), 6.91 (t, *J* = 56.0 Hz, 1H).

**13C NMR** (150 MHz, CDCl3) δ 158.0 (d, *J* = 256.5 Hz), 147.4 (t, *J* = 4.5 Hz), 139.3 (d, *J* = 12.0 Hz), 133.6 (td, *J* = 7.5, 3.0 Hz), 128.4 (d, *J* = 1.5 Hz), 128.2 (t, *J* = 24.0 Hz), 127.6 (d, *J* = 7.5 Hz), 124.0 (d, *J* = 4.5 Hz), 115.1 (d, *J* = 19.5 Hz), 113.3 (t, *J* = 238.5 Hz).

**19F NMR** (564 MHz, CDCl3) δ -112.24 (d, *J* = 56.0 Hz), (-124.41)-(-124.47,) (m).

**HRMS** (ESI) m/z calcd. for C10H7F3N+ [M + H]+ 198.0525, found 198.0528.

-----------------------------------------------------------------------------------------------------------------------------------------------------------------------------------------------

**(32)** **7-Bromo-3-(difluoromethyl)-6-fluoroquinoline**

Prepared according to **General Procedure B** using DFHZ-Tfs (181.3 mg, 0.6 mmol) and 6-bromo-1-(*tert*-butyldimethylsilyl)-5-fluoro-1*H*-indole (98.5 mg, 0.3 mmol) afforded **32** (73.7 mg, 89% yield) as a white solid; mp: 107-109 °C.

**1H NMR** (500 MHz, CDCl3) δ 8.99 (s, 1H), 8.44 (d, *J* = 6.5 Hz, 1H), 8.24 (s, 1H), 7.58 (d, *J* = 8.0 Hz, 1H), 6.87 (t, *J* = 55.5 Hz, 1H).

**13C NMR** (150 MHz, CDCl3) δ 157.2 (d, *J* = 249.0 Hz), 147.5-147.3 (m), 146.3, 134.9, 133.0 (q, *J* = 6.0 Hz), 128.1 (t, *J* = 22.5 Hz), 126.6 (d, *J* = 9.0 Hz), 115.3 (d, *J* = 24.0 Hz), 113.2 (t, *J* = 237.0 Hz), 112.1 (d, *J* = 22.5 Hz).

**19F NMR** (564 MHz, CDCl3) δ -106.28, (t, *J* = 6.6 Hz), -112.41 (d, *J* = 55.5 Hz).

**HRMS** (ESI) m/z calcd. for C10H6BrF3N+ [M + H]+ 275.9630, found 275.9632.

-----------------------------------------------------------------------------------------------------------------------------------------------------------------------------------------------

**(33) 3-(Difluoromethyl)-6-(phenylethynyl)quinoline**

Prepared according to **General Procedure B** using DFHZ-Tfs (181.3 mg, 0.6 mmol) and 1-(*tert*-butyldimethylsilyl)-5-(phenylethynyl)-1*H*-indole (99.5 mg, 0.3 mmol) afforded **33** (78.8 mg, 94% yield) as a white solid; mp: 108-110 °C.

**1H NMR** (500 MHz, CDCl3) δ 9.02 (s, 1H), 8.26 (s, 1H), 8.13 (d, *J* = 8.5 Hz, 1H), 8.07 (d, *J* = 1.5 Hz, 1H), 7.90 (dd, *J* = 9.0, 1.5 Hz, 1H), 7.62-7.55 (m, 2H), 7.41-7.33 (m, 3H), 6.89 (t, *J* = 56.0 Hz, 1H).

**13C NMR** (150 MHz, CDCl3) δ 148.4, 147.6 (t, *J* = 6.0 Hz), 133.7, 133.5 (t, *J* = 6.0 Hz), 131.7, 131.4, 129.6, 128.8, 128.5, 127.8 (t, *J* = 22.5 Hz), 126.7, 122.9, 122.7, 113.5 (d, *J* = 238.5 Hz), 91.5, 88.4.

**19F NMR** (564 MHz, CDCl3) δ -111.92 (d, *J* = 56.0 Hz).

**HRMS** (ESI) m/z calcd. for C18H12F2N+ [M + H]+ 280.0932, found 280.0937.

-----------------------------------------------------------------------------------------------------------------------------------------------------------------------------------------------

**(34) 3-(Trifluoromethyl)-1,8-naphthyridine**

Prepared according to **General Procedure A** using TFHZ-Tfs **2** (115.3 mg, 0.36 mmol) and 1-(*tert*-butyldimethylsilyl)-1*H*-pyrrolo[2,3-*b*]pyridine (69.7 mg, 0.3 mmol) afforded **34** (30.9 mg, 52% yield) as a white solid; mp: 174-176 °C.

**1H NMR** (500 MHz, CDCl3) δ 9.34 (d, *J* = 2.0 Hz, 1H), 9.29-9.24 (m, 1H), 8.52 (s, 1H), 8.33 (dd, *J* = 8.0, 1.5 Hz, 1H), 7.64 (dd, *J* = 8.0, 4.0 Hz, 1H).

**13C NMR** (125 MHz, CDCl3) δ 157.0, 155.9, 149.4 (q, *J* = 2.5 Hz), 137.9, 135.3 (q, *J* = 3.8 Hz), 124.7 (q, *J* = 33.8 Hz), 123.5, 123.2 (q, *J* = 270.0 Hz), 121.1.

**19F NMR** (564 MHz, CDCl3) δ -61.84.

**HRMS** (ESI) m/z calcd. for C9H6F3N2+ [M + H]+ 199.0478, found 199.0480.

-----------------------------------------------------------------------------------------------------------------------------------------------------------------------------------------------

**(35) 3-(Difluoromethyl)-1,8-naphthyridine**

Prepared according to **General Procedure B** using DFHZ-Tfs (181.3 mg, 0.6 mmol) and 1-(*tert*-butyldimethylsilyl)-1*H*-pyrrolo[2,3-*b*]pyridine (69.7 mg, 0.3 mmol) afforded **35** (37.3 mg, 69% yield) as a white solid; mp: 165-167 °C

**1H NMR** (500 MHz, CDCl3) δ 9.25 (d, *J* = 1.0 Hz, 1H), 9.24-9.20 (m, 1H), 8.37 (s, 1H), 8.29 (dd, *J* = 8.0, 1.5 Hz, 1H), 7.59 (dd, *J* = 8.5, 4.5 Hz, 1H), 6.93 (t, *J* = 56.0 Hz, 1H).

**13C NMR** (150 MHz, CDCl3) δ 156.8, 155.1, 150.4 (t, *J* = 6.0 Hz), 137.6, 135.1 (t, *J* = 6.0 Hz), 128.3 (t, *J* = 24.0 Hz), 123.1, 121.6, 113.1 (t, *J* = 238.5 Hz).

**19F NMR** (564 MHz, CDCl3) δ -112.18 (d, *J* = 56.0 Hz).

**HRMS** (ESI) m/z calcd. for C9H7F2N2+ [M + H]+ 181.0572, found 181.0576.

-----------------------------------------------------------------------------------------------------------------------------------------------------------------------------------------------

**(36) 3-(Perfluoroethyl)quinoline**

Prepared according to **General Procedure B** using *N*-triftosylhydrazone (222.0 mg, 0.6 mmol) derived from ethyl 2,2,3,3,3-pentafluoropropanoate and *N*-TBS indole (69.3 mg, 0.3 mmol) afforded **36** (44.5 mg, 60% yield) as a pale yellow iol.

**1H NMR** (500 MHz, CDCl3) δ 9.06 (s, 1H), 8.45 (s, 1H), 8.21 (d, *J* = 8.5 Hz, 1H), 7.96 (d, *J* = 8.0 Hz, 1H), 7.91-7.86 (m, 1H), 7.72-7.66 (m, 1H).

**13C NMR** (150 MHz, CDCl3) δ 149.4, 146.4 (t, *J* = 5.0 Hz), 135.6 (t, *J* = 6.8 Hz), 131.9, 129.6, 128.5, 128.0, 126.3, 121.8 (t, *J* = 24.0 Hz), 119.1 (qt, *J* = 286.0, 39.0 Hz), 113.2 (tq, *J* = 254.7, 39.0 Hz).

**19F NMR** (564 MHz, CDCl3) δ -84.7 (t, *J* = 2.0 Hz), -114.7 (q, *J* = 2.1 Hz).

**HRMS** (ESI) m/z calcd. for C11H7F5N+ [M + H]+ 248.0493, found 248.0498.

-----------------------------------------------------------------------------------------------------------------------------------------------------------------------------------------------

**(37) 3-(1,2,2,2-tetrafluoroethyl)quinoline**

Prepared according to **General Procedure D** using *N*-triftosylhydrazone (222.0 mg, 0.6 mmol) derived from ethyl 2,2,3,3,3-pentafluoropropanoate and *N*-TBS indole (69.3 mg, 0.3 mmol) afforded **37** (67.3 mg, 98% yield) as a pale yellow solid; mp: 38-40 °C.

**1H NMR** (500 MHz, CDCl3) δ 8.95 (s, 1H), 8.29 (s, 1H), 8.16 (d, *J* = 8.5 Hz, 1H), 7.87 (d, *J* = 8.0 Hz, 1H), 7.83-7.77 (m, 1H), 7.64-7.59 (m, 1H), 5.83 (qd, *J* = 44.0, 6.0 Hz, 1H).

**13C NMR** (150 MHz, CDCl3) δ 148.9, 148.0 (d, *J* = 6.0 Hz), 135.5 (d, *J* = 7.5 Hz), 131.0, 129.5, 128.2, 127.6, 127.0, 123.3 (d, *J* = 19.5 Hz), 122.0 (dq, *J* = 280.5, 28.5 Hz), 87.5 (dq, *J* = 186.0, 36.0 Hz).

**19F NMR** (564 MHz, CDCl3) δ -78.56 (dd, *J* = 13.0, 6.8 Hz), -196.21 (dq, *J* = 44.0, 13.0 Hz).

**HRMS** (ESI) m/z calcd. for C11H8F4N+ [M + H]+ 230.0587, found 230.0590.

-----------------------------------------------------------------------------------------------------------------------------------------------------------------------------------------------

**(38) 5-Chloro-3-(1,2,2,2-tetrafluoroethyl)quinoline**

Prepared according to **General Procedure D** using *N*-triftosylhydrazone (222.0 mg, 0.6 mmol) derived from ethyl 2,2,3,3,3-pentafluoropropanoate and 1-(*tert*-butyldimethylsilyl)-4-chloro-1*H*-indole (39.5 mg, 0.3 mmol) afforded **38** (47.5 mg, 50% yield) as a white solid; mp: 47-49 °C.

**1H NMR** (500 MHz, CDCl3) δ 9.01 (s, 1H), 8.69 (s, 1H), 8.10 (d, *J* = 8.0 Hz, 1H), 7.77-7.68 (m, 2H), 5.90 (dq, *J* = 44.0, 6.0 Hz, 1H).

**13C NMR** (150 MHz, CDCl3) δ 149.5, 148.6 (d, *J* = 5.5 Hz), 132.5 (d, *J* = 7.5 Hz), 131.8, 130.7, 128.7, 127.7, 125.3, 124.3 (d, *J* = 19.5 Hz), 121.9 (qd, *J* = 279.0, 30.0 Hz), 87.5 (dq, *J* = 187.5, 36.0 Hz).

**19F NMR** (564 MHz, CDCl3) δ -78.42 (dd, *J* = 13.0, 6.0 Hz), -196.65 (dq, *J* = 43.0, 13.0 Hz).

**HRMS** (ESI) m/z calcd. for C11H7ClF4N+ [M + H]+ 264.0198, found 264.0201.

-----------------------------------------------------------------------------------------------------------------------------------------------------------------------------------------------

**(39) 6-Bromo-3-(1,2,2,2-tetrafluoroethyl)quinoline**

Prepared according to **General Procedure D** using *N*-triftosylhydrazone (222.0 mg, 0.6 mmol) derived from ethyl 2,2,3,3,3-pentafluoropropanoate and 5-bromo-1-(*tert*-butyldimethylsilyl)-1*H*-indole (92.7 mg, 0.3 mmol) afforded **39** (82.0 mg, 89% yield) as a white solid; mp: 79-81 °C.

**1H NMR** (500 MHz, CDCl3) δ 8.94 (s, 1H), 8.20 (s, 1H), 8.04 (d, *J* = 2.0 Hz, 1H), 8.02 (d, *J* = 9.0 Hz, 1H), 7.86 (dd, *J* = 9.0, 2.0 Hz, 1H), 5.84 (dq, *J* = 44.0, 6.0 Hz, 1H).

**13C NMR** (150 MHz, CDCl3) δ 148.3 (d, *J* = 6.0 Hz), 147.5, 134.5, 134.3 (d, *J* = 7.5 Hz), 131.2, 130.2, 128.1, 124.2 (d, *J* = 19.5 Hz), 121.9 (qd, *J* = 280.5, 28.5 Hz), 121.7, 87.3 (dq, *J* = 186.0, 36.0 Hz).

**19F NMR** (564 MHz, CDCl3) δ -78.52 (dd, *J* = 13.0, 6.0 Hz), -197.05 (dq, *J* = 43.4, 13.0 Hz).

**HRMS** (ESI) m/z calcd. for C11H7BrF4N+ [M + H]+ 307.9693, found 307.9696.

-----------------------------------------------------------------------------------------------------------------------------------------------------------------------------------------------

**(40) Methyl 3-(1,2,2,2-tetrafluoroethyl)quinoline-6-carboxylate**

Prepared according to **General Procedure D** using *N*-triftosylhydrazone (222.0 mg, 0.6 mmol) derived from ethyl 2,2,3,3,3-pentafluoropropanoate and methyl 1-(*tert*-butyldimethylsilyl)-1*H*-indole-5-carboxylate (86.7 mg, 0.3 mmol) afforded **40** (80.1 mg, 93% yield) as a pale yellow solid; mp: 140-142 °C.

**1H NMR** (500 MHz, CDCl3) δ 9.04 (s, 1H), 8.66 (s, 1H), 8.42-8.36 (m, 2H), 8.20 (d, *J* = 9.0 Hz, 1H), 5.87 (dq, *J* = 44.0, 6.0 Hz, 1H), 4.01 (s,3H).

**13C NMR** (150 MHz, CDCl3) δ 166.1, 150.6, 150.0 (d, *J* = 6.0 Hz), 136.6 (d, *J* = 7.5 Hz), 131.3, 130.5, 129.9, 129.2, 126.2, 124.2 (d, *J* = 19.5 Hz), 121.9 (qd, *J* = 280.5, 28.5 Hz), 87.3 (dq, *J* = 187.5, 36.0 Hz), 52.6.

**19F NMR** (564 MHz, CDCl3) δ -78.51 (dd, *J* = 13.0, 6.0 Hz), -196.95 (dq, *J* = 44.0, 13.0 Hz).

**HRMS** (ESI) m/z calcd. for C13H10F4NO2+ [M + H]+ 288.0642, found 288.0645.

-----------------------------------------------------------------------------------------------------------------------------------------------------------------------------------------------

**(41) 6-Methoxy-3-(1,2,2,2-tetrafluoroethyl)quinoline**

Prepared according to **General Procedure D** using *N*-triftosylhydrazone (222.0 mg, 0.6 mmol) derived from ethyl 2,2,3,3,3-pentafluoropropanoate and 1-(*tert*-butyldimethylsilyl)-5-methoxy-1*H*-indole (138.6 mg, 0.3 mmol) afforded **41** (63.7 mg, 82% yield) as a white solid; mp: 70-72 °C.

**1H NMR** (500 MHz, CDCl3) δ 8.78 (s, 1H), 8.17 (s, 1H), 8.03 (d, *J* = 9.0 Hz, 1H), 7.44 (dd, *J* = 9.0, 2.5 Hz, 1H), 7.10 (d, *J* = 2.5 Hz, 1H), 5.80 (dq, *J* = 44.0, 6.0 Hz, 1H), 3.92 (s, 3H).

**13C NMR** (150 MHz, CDCl3) δ 158.5, 145.5 (d, *J* = 6.0 Hz), 145.2, 134.0 (d, *J* = 7.5 Hz), 130.8, 128.2, 124.0, 123.5 (d, *J* = 19.5 Hz), 122.0 (dq, *J* = 280.5, 30.0 Hz), 105.3, 87.5 (dq, *J* = 186.0, 36.0 Hz), 55.6.

**19F NMR** (564 MHz, CDCl3) δ -78.56 (dd, *J* = 13.0, 6.0 Hz), -196.20 (dq, *J* = 44.0, 13.0 Hz).

**HRMS** (ESI) m/z calcd. for C12H10F4NO+ [M + H]+ 260.0693, found 260.0690.

-----------------------------------------------------------------------------------------------------------------------------------------------------------------------------------------------

**(42) *tert*-Butyl (3-(1,2,2,2-tetrafluoroethyl)quinolin-6-yl)carbamate**

Prepared according to **General Procedure C** using *N*-triftosylhydrazone (222.0 mg, 0.6 mmol) derived from ethyl 2,2,3,3,3-pentafluoropropanoate and *tert*-butyl (1-(*tert*-butyldimethylsilyl)-1*H*-indol-5-yl)carbamate (103.8 mg, 0.3 mmol) afforded **42** (76.4 mg, 74% yield) as a pale yellow solid; mp: 125-127 °C.

**1H NMR** (500 MHz, CDCl3) δ 8.82 (s, 1H), 8.23-8.17 (m, 2H), 8.06 (d, *J* = 9.0 Hz, 1H), 7.55 (dd, *J* = 9.0, 2.0 Hz, 1H), 6.84 (s, 1H), 5.80 (dq, *J* = 44.0, 6.0 Hz, 1H), 1.56 (s, 9H).

**13C NMR** (150 MHz, CDCl3) δ 152.5, 146.4 (d, *J* = 6.0 Hz), 145.7, 137.3, 134.9 (d, *J* = 7.5 Hz), 130.2, 127.8, 124.0, 123.8 (d, *J* = 19.5 Hz), 122.0 (qd, *J* = 279.0, 28.5 Hz), 113.9, 87.6 (dq, *J* = 186.0, 36.0 Hz), 81.4, 28.3.

**19F NMR** (564 MHz, CDCl3) δ -78.53 (dd, *J* = 13.0, 6.0 Hz), -196.35 (dq, *J* = 44.0, 13.0 Hz).

**HRMS** (ESI) m/z calcd. for C16H17F4N2O2+ [M + H]+ 345.1121, found 345.1123.

-----------------------------------------------------------------------------------------------------------------------------------------------------------------------------------------------

**(43) 7-(Benzyloxy)-3-(1,2,2,2-tetrafluoroethyl)quinoline**

Prepared according to **General Procedure D** using *N*-triftosylhydrazone (222.0 mg, 0.6 mmol) derived from ethyl 2,2,3,3,3-pentafluoropropanoate and 6-(benzyloxy)-1-(*tert*-butyldimethylsilyl)-1*H*-indole (101.1 mg, 0.3 mmol) afforded **43** (68.3 mg, 68% yield) as a white solid; mp: 105-107 °C.

**1H NMR** (500 MHz, CDCl3) δ 8.87 (s, 1H), 8.21 (s, 1H), 7.78 (d, *J* = 9.0 Hz, 1H), 7.54 (s, 1H), 7.50 (d, *J* = 7.5 Hz, 2H), 7.42 (t, *J* = 7.5 Hz, 2H), 7.39-7.32 (m, 2H), 5.79 (dq, *J* = 44.0, 6.0 Hz, 1H), 5.24 (s, 2H).

**13C NMR** (125 MHz, CDCl3) δ 161.0, 150.8, 148.5 (d, *J* = 7.5 Hz), 136.0, 135.1 (d, *J* = 7.5 Hz), 129.3, 128.7, 128.3, 127.7, 122.4, 122.1 (qd, *J* = 280.0, 28.8 Hz), 121.3, 121.1 (d, *J* = 21.3 Hz), 108.5, 87.6 (dq, *J* = 186.3, 36.3 Hz), 70.3.

**19F NMR** (470 MHz, CDCl3) δ -78.57 (dd, *J* = 13.0, 6.0 Hz), -194.72 (dq, *J* = 44.0, 13.0 Hz).

**HRMS** (ESI) m/z calcd. for C18H14F4NO+ [M + H]+ 336.1006, found 336.1008.

-----------------------------------------------------------------------------------------------------------------------------------------------------------------------------------------------

**(44) 8-Methyl-3-(1,2,2,2-tetrafluoroethyl)quinoline**

Prepared according to **General Procedure D** using *N*-triftosylhydrazone (222.0 mg, 0.6 mmol) derived from ethyl 2,2,3,3,3-pentafluoropropanoate and 1-(*tert*-butyldimethylsilyl)-7-methyl-1*H*-indole (73.5 mg, 0.3 mmol) afforded **44** (59.0 mg, 81% yield) as a white solid; mp: 49-50 °C.

**1H NMR** (500 MHz, CDCl3) δ 8.98 (s, 1H), 8.27 (s, 1H), 7.73 (d, *J* = 8.0 Hz, 1H), 7.66 (d, *J* = 7.0 Hz, 1H), 7.52 (t, *J* = 7.5 Hz, 1H), 5.84 (dq, *J* = 44.0, 6.0 Hz, 1H), 2.83 (s, 3H).

**13C NMR** (125 MHz, CDCl3) δ 148.1, 146.9 (d, *J* = 5.5 Hz), 137.5, 135.7 (d, *J* = 6.3 Hz), 131.1, 127.4, 127.0, 126.2, 123.0 (d, *J* = 20.0 Hz), 122.1 (qd, *J* = 280.0, 28.8 Hz), 87.6 (dq, *J* = 186.3, 36.3 Hz), 18.0.

**19F NMR** (470 MHz, CDCl3) δ -78.54 (dd, *J* = 13.0, 6.0 Hz), 196.09 (dq, *J* = 44.0, 13.0 Hz).

**HRMS** (ESI) m/z calcd. for C12H10F4N+ [M + H]+ 244.0744, found 244.0746.

-----------------------------------------------------------------------------------------------------------------------------------------------------------------------------------------------

**(45) 6-(Phenylethynyl)-3-(1,2,2,2-tetrafluoroethyl)quinoline**

Prepared according to **General Procedure D** using *N*-triftosylhydrazone (222.0 mg, 0.6 mmol) derived from ethyl 2,2,3,3,3-pentafluoropropanoate and 1-(*tert*-butyldimethylsilyl)-5-(phenylethynyl)-1*H*-indole (99.3 mg, 0.3 mmol) afforded **45** (80.0 mg, 81% yield) as a white solid; mp: 103-105 °C.

**1H NMR** (500 MHz, CDCl3) δ 8.94 (s, 1H), 8.24 (s, 1H), 8.12 (d, *J* = 9.0 Hz, 1H), 8.06 (d, *J* = 1.0 Hz, 1H), 7.90 (dd, *J* = 9.0, 1.5 Hz, 1H), 7.62-7.55 (m, 2H), 7.42-7.35 (m, 3H), 5.83 (dq, *J* = 44.0, 6.0 Hz, 1H).

**13C NMR** (150 MHz, CDCl3) δ 148.4 (d, *J* = 6.0 Hz), 148.2, 135.0 (d, *J* = 7.5 Hz), 133.7, 131.7, 131.2, 129.6, 128.8, 128.5, 126.8, 124.0 (d, *J* = 21.0 Hz), 122.9, 122.6, 121.9 (qd, *J* = 279.0, 28.5 Hz), 91.5, 88.4, 87.4 (dq, *J* = 186.0, 36.0 Hz).

**19F NMR** (564 MHz, CDCl3) δ -78.48 (dd, *J* = 13.0, 6.8 Hz), -196.65 (dq, *J* = 44.0, 13.0 Hz).

**HRMS** (ESI) m/z calcd. for C19H12F4N+ [M + H]+ 330.0900, found 330.0905.

-----------------------------------------------------------------------------------------------------------------------------------------------------------------------------------------------

**(46) 6-(Allyloxy)-3-(1,2,2,2-tetrafluoroethyl)quinoline**

Prepared according to **General Procedure D** using *N*-triftosylhydrazone (222.0 mg, 0.6 mmol) derived from ethyl 2,2,3,3,3-pentafluoropropanoate and 5-(Allyloxy)-1-(*tert*-butyldimethylsilyl)-1*H*-indole (86.1 mg, 0.3 mmol) afforded **46** (61.6 mg, 72% yield) as a white solid; mp: 55-57 °C.

**1H NMR** (500 MHz, CDCl3) δ 8.79 (s, 1H), 8.17 (s, 1H), 8.05 (d, *J* = 9.2 Hz, 1H), 7.48 (dd, *J* = 9.2, 2.5 Hz, 1H), 7.13 (d, *J* = 2.5 Hz, 1H), 6.18-6.05 (m, 1H), 5.80 (dq, *J* = 44.0, 6.0 Hz, 1H), 5.51-5.45 (m, 1H), 5.37-5.33 (m, 1H), 4.70-4.64 (m, 2H).

**13C NMR** (125 MHz, CDCl3) δ 157.4, 145.6 (d, *J* = 5.0 Hz), 145.2, 134.0 (d, *J* = 6.3 Hz), 132.5, 130.9, 128.2, 124.3, 123.6 (d, *J* = 20.0 Hz), 122.0 (qd, *J* = 280.0, 28.9 Hz), 118.2, 106.5, 88.6 (dq, *J* = 186.3, 35.0 Hz), 69.1.

**19F NMR** (470 MHz, CDCl3) δ -78.52 (dd, *J* = 13.0, 6.0 Hz), -196.18 (dq, *J* = 44.0, 13.0 Hz).

**HRMS** (ESI) m/z calcd. for C14H12F4NO+ [M + H]+ 286.0580, found 286.0583.

-----------------------------------------------------------------------------------------------------------------------------------------------------------------------------------------------

**(47) 7-Bromo-6-fluoro-3-(1,2,2,2-tetrafluoroethyl)quinoline**

Prepared according to **General Procedure D** using *N*-triftosylhydrazone (222.0 mg, 0.6 mmol) derived from ethyl 2,2,3,3,3-pentafluoropropanoate and 6-bromo-1-(*tert*-butyldimethylsilyl)-5-fluoro-1*H*-indole (98.1 mg, 0.3 mmol) afforded **47** (79.0 mg, 81% yield) as a white solid; mp: 95-97 °C.

**1H NMR** (500 MHz, CDCl3) δ 8.91 (s, 1H), 8.44 (d, *J* = 7.0 Hz, 1H), 8.23 (s, 1H), 7.57 (d, *J* = 8.0 Hz, 1H), 5.83 (dq, *J* = 44.0, 6.0 Hz, 1H).

**13C NMR** (150 MHz, CDCl3) δ 157.2 (d, *J* = 250.5 Hz), 148.2 (d, *J* = 3.0 Hz), 146.1, 134.8, 134.5 (t, *J* = 6.0 Hz), 126.8 (d, *J* = 9.0 Hz), 124.4 (d, *J* = 19.5 Hz), 121.8 (qd, *J* = 279.0, 28.5 Hz), 115.3 (d, *J* = 24.0 Hz), 111.9 (d, *J* = 24.0 Hz), 87.2 (dq, *J* = 187.5, 36.0 Hz).

**19F NMR** (564 MHz, CDCl3) δ -78.49 (dd, *J* = 13.0, 6.0 Hz), -106.15 (t, *J* = 7.3 Hz), -197.40 (dq, *J* = 44.0, 13.0 Hz).

**HRMS** (ESI) m/z calcd. for C11H6BrF5N+ [M + H]+ 325.9598, found 325.9595.

-----------------------------------------------------------------------------------------------------------------------------------------------------------------------------------------------

**(48) 7-(1,2,2,2-Tetrafluoroethyl)-[1,3]dioxolo[4,5-*g*]quinoline**

Prepared according to **General Procedure D** using *N*-triftosylhydrazone (222.0 mg, 0.6 mmol) derived from ethyl 2,2,3,3,3-pentafluoropropanoate and 5-(*tert*-butyldimethylsilyl)-5*H*-[1,3]dioxolo[4,5-*f*]indole (82.5 mg, 0.3 mmol) afforded **48** (42.6 mg, 52% yield) as a white solid; mp: 80-82 °C.

**1H NMR** (500 MHz, CDCl3) δ 8.71 (s, 1H), 8.07 (s, 1H), 7.40 (s, 1H), 7.08 (s, 1H), 6.14 (s, 2H), 5.75 (dq, *J* = 44.0, 6.0 Hz, 1H).

**13C NMR** (150 MHz, CDCl3) δ 152.0, 148.2, 147.7, 146.0 (d, *J* = 6.0 Hz), 133.9 (d, *J* = 6.0 Hz), 124.4, 122.1 (qd, *J* = 279.0, 28.5 Hz), 121.6 (d, *J* = 19.5 Hz), 105.8, 102.9, 102.1, 87.5 (dq, *J* = 186.0, 34.5 Hz).

**19F NMR** (564 MHz, CDCl3) δ -78.61 (dd, *J* = 13.5, 6.8 Hz), -195.14 (dq, *J* = 44.0, 13.5 Hz).

**HRMS** (ESI) m/z calcd. for C12H8F4NO2+ [M + H]+ 274.0486, found 274.0488.

-----------------------------------------------------------------------------------------------------------------------------------------------------------------------------------------------

**(49) 3-(1,2,2,2-Tetrafluoroethyl)-1,8-naphthyridine**

Prepared according to **General Procedure D** using *N*-triftosylhydrazone (222.0 mg, 0.6 mmol) derived from ethyl 2,2,3,3,3-pentafluoropropanoate and 1-(*tert*-butyldimethylsilyl)-1*H*-pyrrolo[2,3-*b*]pyridine (69.6 mg, 0.3 mmol) afforded **49** (30.4 mg, 44% yield) as a white solid; mp: 148-150 °C.

**1H NMR** (500 MHz, CDCl3) δ 9.23 (d, *J* = 3.0 Hz, 1H), 9.18 (s, 1H), 8.38 (s, 1H), 8.29 (d, *J* = 8.0 Hz, 1H), 7.60 (dd, *J* = 8.0, 4.5 Hz, 1H), 5.91 (dq, *J* = 44.0, 6.0 Hz, 1H).

**13C NMR** (150 MHz, CDCl3) δ 156.6, 155.2, 151.3 (d, *J* = 6.0 Hz), 137.5, 136.6 (d, *J* = 6.0 Hz), 124.6 (d, *J* = 19.5 Hz), 123.1, 121.84 (qd, *J* = 280.5, 28.5 Hz), 121.78, 87.1 (dq, *J* = 187.5, 36.0 Hz).

**19F NMR** (564 MHz, CDCl3) δ -78.52 (dd, *J* = 11.8, 5.1 Hz), -196.97 (dq, *J* = 44.0, 13.5 Hz).

**HRMS** (ESI) m/z calcd. for C10H7F4N2+ [M + H]+ 231.0540, found 231.0545.

-----------------------------------------------------------------------------------------------------------------------------------------------------------------------------------------------

**(50) 3-(1,2,2,3,3,3-Hexafluoropropyl)quinoline**

Prepared according to **General Procedure D** using *N*-triftosylhydrazone (252.0 mg, 0.6 mmol) derived from ethyl 2,2,3,3,4,4,4-heptafluorobutanoate and *N*-TBS indole (69.3 mg, 0.3 mmol) afforded **50** (67.8 mg, 81% yield) as a white solid; mp: 44-46 °C.

**1H NMR** (500 MHz, CDCl3) δ 9.05 (s, 1H), 8.41 (d, *J* = 1.5 Hz, 1H), 8.15 (d, *J* = 8.5 Hz, 1H), 7.91 (d, *J* = 8.0 Hz, 1H), 7.83 (t, *J* = 7.5 Hz, 1H), 7.65 (t, *J* = 7.5 Hz, 1H), 5.92 (dq, *J* = 33.5, 7.5 Hz, 1H).

**13C NMR** (150 MHz, CDCl3) δ 148.9, 148.2 (q, *J* = 6.0 Hz), 136.0 (q, *J* = 7.5 Hz), 131.1, 129.5, 128.3, 127.7, 127.0, 122.7 (q, *J* = 21.0 Hz), 118.5 (qt, *J* = 285.0, 34.5 Hz), 110.9 (tqd, J = 260.0, 37.5, 29.0 Hz), 87.9 (ddd, *J* = 186.0, 34.5, 24.0 Hz).

**19F NMR** (564 MHz, CDCl3) δ -81.97 (d, *J* = 11.0 Hz), -122.35 (dd, *J* = 284.3, 11.8 Hz), -131.35 (dt, *J* = 284.3, 16.4 Hz), (-197.31)-(-197.53) (m).

**HRMS** (ESI) m/z calcd. for C12H8F6N+ [M + H]+ 280.0555, found 280.0557.

-----------------------------------------------------------------------------------------------------------------------------------------------------------------------------------------------

**(51) 3-(1,2,2,3,3,4,4,4-Octafluorobutyl)quinoline**

Prepared according to **General Procedure D** using *N*-triftosylhydrazone (282 mg, 0.6 mmol) derived from ethyl 2,2,3,3,4,4,5,5,5-nonafluoropentanoate and *N*-TBS indole (69.3 mg, 0.3 mmol) afforded **51** (81.9 mg, 83% yield) as a coloress oil.

**1H NMR** (500 MHz, CDCl3) δ 8.94 (s, 1H), 8.30 (s, 1H), 8.17 (d, *J* = 8.5 Hz, 1H), 7.89 (d, *J* = 8.0 Hz, 1H), 7.84-7.78 (m, 1H), 7.66-7.59 (m, 1H), 6.04 (ddd, J = 43.5, 19.0, 2.5 Hz, 1H).

**13C NMR** (150 MHz, CDCl3) δ 148.9, 148.3 (d, *J* = 6.0 Hz), 136.1 (d, *J* = 7.5 Hz), 131.1, 129.5, 128.2, 127.6, 127.0, 122.7 (d, *J* = 21.0 Hz), 117.5 (qt, *J* = 288.0, 32.5 Hz), 114.8-106.3 (m, 2C), 86.8 (ddd, *J* = 187.5, 33.0, 22.5 Hz).

**19F NMR** (564 MHz, CDCl3) δ (-80.76)-(-80.89) (m), (-119.35)-(-120.05) (m), (-126.26)-(-126.40) (m), (-126.47)-(126.55) (m), (-127.71)-(-128.43) (m), (-196.55)-(-196-79) (m).

**HRMS** (ESI) m/z calcd. for C13H8F8N+ [M + H]+ 330.0524, found 330.0526.

-----------------------------------------------------------------------------------------------------------------------------------------------------------------------------------------------

**(52) 3-(1,2,2,3,3,4,4,5,5,5-Decafluoropentyl)quinoline**

Prepared according to **General Procedure D** using *N*-triftosylhydrazone (312.0 mg, 0.6 mmol) derived from ethyl 2,2,3,3,4,4,5,5,6,6,6-undecafluorohexanoate and *N*-TBS indole (69.3 mg, 0.3 mmol) afforded **52** (89.8 mg, 79% yield) as a pale yellow oil.

**1H NMR** (500 MHz, CDCl3) δ 8.94 (s, 1H), 8.28 (s, 1H), 8.16 (d, *J* = 8.5 Hz, 1H), 7.86 (d, *J* = 8.5 Hz, 1H), 7.79 (t, *J* = 7.5 Hz, 1H), 7.60 (t, *J* = 7.5 Hz, 1H), 6.04 (ddd, *J* = 43.5, 18.5, 2.0 Hz, 1H).

**13C NMR** (150 MHz, CDCl3) δ 149.0, 148.3 (d, *J* = 6.0 Hz), 136.1 (d, *J* = 6.0 Hz), 131.1, 129.5, 128.2, 127.6, 127.0, 122.7 (d, *J* =19.5 Hz), 117.3 (qt, *J* = 288.0, 33.0 Hz), 115.4-106.0 (m, 3C), 87.0 (ddd, *J* = 187.5, 33.0, 24.0 Hz).

**19F NMR** (564 MHz, CDCl3) δ (-81.02)-(81.11) (m), (-118.92)-(-119.67) (m), (-123.02)-(-123.21) (m), (-125.34)-(-127.54) (m), (-196.57)-(-196.82) (m).

**HRMS** (ESI) m/z calcd. for C14H8F10N+ [M + H]+ 380.0492, found 380.0495.

-----------------------------------------------------------------------------------------------------------------------------------------------------------------------------------------------

**(53) 3-(1,2,2,3,3,4,4,5,5,6,6,6-Dodecafluorohexyl)quinoline**

Prepared according to **General Procedure D** using *N*-triftosylhydrazone (342.0 mg, 0.6 mmol) derived from ethyl 2,2,3,3,4,4,5,5,6,6,7,7,7-tridecafluoroheptanoate and *N*-TBS indole (69.3 mg, 0.3 mmol) afforded **53** (100.4 mg, 78% yield) as a pale yellow oil.

**1H NMR** (500 MHz, CDCl3) δ 8.95 (s, 1H), 8.31 (s, 1H), 8.17 (d, *J* = 8.5 Hz, 1H), 7.90 (d, *J* = 8.0 Hz, 1H), 7.82 (t, *J* = 7.5 Hz, 1H), 7.64 (t, *J* = 7.5 Hz, 1H), 6.06 (ddd, *J* = 43.5, 18.5, 2.5 Hz, 1H).

**13C NMR** (150 MHz, CDCl3) δ 149.0, 148.4 (d, *J* = 6.0 Hz), 136.2 (d, *J* = 6.0 Hz), 131.1, 129.6, 128.3, 127.7, 127.0, 122.7 (d, *J* = 21.0 Hz), 117.2 (qt, *J* = 288.0, 32.5 Hz), 115.5-80.85 (m, 4C), 87.0 (ddd, *J* = 187.5, 33.0, 22.5 Hz).

**19F NMR** (564 MHz, CDCl3) δ (-80.74)-(-) (m), (-118.69)-(-119.49) (m), (-121.43)-(-123.82) (m), (-125.31)-(-127.31) (m), (-196.40)-(-196.70) (m).

**HRMS** (ESI) m/z calcd. for C15H8F12N+ [M + H]+ 430.0460, found 430.0462.

-----------------------------------------------------------------------------------------------------------------------------------------------------------------------------------------------

**(54) 3-(1,2,2,3,3,4,4,5,5,6,6,7,7,7-Tetradecafluoroheptyl)quinoline**

Prepared according to **General Procedure D** using *N*-triftosylhydrazone (394.8 mg, 0.6 mmol) derived from ethyl 2,2,3,3,4,4,5,5,6,6,7,7,8,8,8-pentadecafluorooctanoate and *N*-TBS indole (69.3 mg, 0.3 mmol) afforded **54** (110.6 mg, 77% yield) as a pale yellow solid; mp: 58-59 °C.

**1H NMR** (500 MHz, CDCl3) δ 8.95 (s, 1H), 8.30 (s, 1H), 8.17 (d, *J* = 8.5 Hz, 1H), 7.88 (d, *J* = 8.0 Hz, 1H), 7.81 (t, *J* = 7.5 Hz, 1H), 7.62 (t, *J* = 7.5 Hz, 1H), 6.05 (ddd, *J* = 43.5, 18.5, 2.5 Hz, 1H).

**13C NMR** (150 MHz, CDCl3) δ 149.0, 148.3 (d, *J* = 6.0 Hz), 136.2 (d, *J* = 6.0 Hz), 131.1, 129.5, 128.2, 127.6, 127.0, 122.8 (d, *J* = 21.0 Hz), 117.1 (qt, *J* = 288.0, 33.0 Hz), 115.6-107.7 (m, 5C), 87.1 (ddd, *J* = 187.5, 34.5, 24.0 Hz).

**19F NMR** (564 MHz, CDCl3) δ (-80.83)-(-80.95) (m), (-118.68)-(-119.47) (m), (-121.25)-(-123.65) (m), (-125.36)-(-127.26) (m), (-196.43)-(-196.68) (m).

**HRMS** (ESI) m/z calcd. for C16H8F14N+ [M + H]+ 480.0428, found 480.0430.

-----------------------------------------------------------------------------------------------------------------------------------------------------------------------------------------------

**(55) 3-(1,2,2,3,3,4,4,5,5,6,6,7,7,8,8,9,9,9-Octadecafluorononyl)quinoline**

Prepared according to **General Procedure D** using *N*-triftosylhydrazone (454.8 mg, 0.6 mmol) derived from ethyl 2,2,3,3,4,4,5,5,6,6,7,7,8,8,9,9,10,10,10-nonadecafluorodecanoate and *N*-TBS indole (69.3 mg, 0.3 mmol) afforded **55** (110.6 mg, 65% yield) as a pale yellow solid; mp: 76-78 °C.

**1H NMR** (600 MHz, CDCl3) δ 8.95 (s, 1H), 8.32 (s, 1H), 8.18 (d, *J* = 8.4 Hz, 1H), 7.91 (d, *J* = 8.4 Hz, 1H), 7.86-7.81 (m, 1H), 7.67-7.62 (m, 1H), 6.07 (ddd, *J* = 43.5, 18.5, 2.5 Hz, 1H).

**13C NMR** (150 MHz, CDCl3) δ 149.0, 148.4 (d, *J* = 6.0 Hz), 136.2 (d, *J* = 6.0 Hz), 131.1, 129.6, 128.3, 127.7, 127.0, 122.7 (d, *J* = 21.0 Hz), 117.1 (qt, *J* = 288.0, 32.5 Hz), 115.4-107.7 (m, 7C), 87.1 (ddd, *J* = 187.5, 33.0, 24.0 Hz).

**19F NMR** (564 MHz, CDCl3) δ (-80.68)-(-80.78) (m), (-118.58)-(-119.40) (m), (-120.99)-(-123.48) (m), (-125.30)-(-127.18) (m), (-196.34)-(-196.63) (m).

**HRMS** (ESI) m/z calcd. for C18H8F18N+ [M + H]+ 580.0364, found 580.0366.

-----------------------------------------------------------------------------------------------------------------------------------------------------------------------------------------------

**(56) Quinoline-3-carbaldehyde**

Prepared according to **General Procedure E** using TFHZ-Tfs **2** (115.3 mg, 0.36 mmol) and *N*-TBS indole (69.4 mg, 0.3 mmol) afforded **56** (36.8 mg, 78% yield) as a white solid; mp: 68-71 °C.

**1H NMR** (500 MHz, CDCl3) δ 10.26 (s, 1H), 9.37 (d, *J* = 2.0 Hz, 1H), 8.64 (d, *J* = 1.5 Hz, 1H), 8.19 (d, *J* = 8.5 Hz, 1H), 8.00 (d, *J* = 8.0 Hz, 1H), 7.89 (t, *J* = 8.0 Hz, 1H), 7.67 (t, *J* = 7.5 Hz, 1H).

**13C NMR** (125 MHz, CDCl3) δ 190.7, 150.6, 149.1, 140.1, 132.7, 129.7, 129.4, 128.6, 127.9, 127.0.

**HRMS** (ESI) m/z calcd. for C10H8NO+ [M + H]+ 158.0600, found 158.0604.

-----------------------------------------------------------------------------------------------------------------------------------------------------------------------------------------------

**(57) 5-Chloroquinoline-3-carbaldehyde**

Prepared according to **General Procedure E** using TFHZ-Tfs **2** (115.3 mg, 0.36 mmol) and 1-(tert-butyldimethylsilyl)-4-chloro-1H-indole (79.8 mg, 0.3 mmol) afforded **57** (34.5 mg, 60% yield) as a white solid; mp: 132-134 °C.

**1H NMR** (500 MHz, CDCl3) δ 10.31 (s, 1H), 9.40 (d, *J* = 1.5 Hz, 1H), 9.03 (d, *J* = 1.5 Hz, 1H), 8.12 (d, *J* = 8.5 Hz, 1H), 7.80 (t, *J* = 7.5 Hz, 1H), 7.74 (d, *J* = 7.5 Hz, 1H).

**13C NMR** (125 MHz, CDCl3) δ 190.5, 151.2, 149.5, 137.3, 133.0, 132.3, 129.1, 128.9, 127.9, 125.5.

**HRMS** (ESI) m/z calcd. for C10H7ClNO+ [M + H]+ 192.0211, found 192.0213.

-----------------------------------------------------------------------------------------------------------------------------------------------------------------------------------------------

**(58) 5-Methylquinoline-3-carbaldehyde**

Prepared according to **General Procedure E** using TFHZ-Tfs **2** (115.3 mg, 0.36 mmol) and 1-(*tert*-butyldimethylsilyl)-4-methyl-1*H*-indole (73.6 mg, 0.3 mmol) afforded **58** (35.4 mg, 69% yield) as a white solid; mp: 73-75 °C.

**1H NMR** (500 MHz, CDCl3) δ 10.27 (s, 1H), 9.34 (d, *J* = 1.5 Hz, 1H), 8.80 (d, *J* = 1.5 Hz, 1H), 8.02 (d, *J* = 8.5 Hz, 1H), 7.76 (t, *J* = 7.5 Hz, 1H), 7.48 (d, *J* = 7.0 Hz, 1H), 2.78 (s, 3H).

**13C NMR** (125 MHz, CDCl3) δ 190.9, 151.1, 148.9, 136.7, 136.4, 132.4, 128.3, 128.1, 127.9, 126.5, 18.6.

**HRMS** (ESI) m/z calcd. for C11H10NO+ [M + H]+ 172.0757, found 172.0755.

-----------------------------------------------------------------------------------------------------------------------------------------------------------------------------------------------

**(59) 6-Methoxyquinoline-3-carbaldehyde**

Prepared according to **General Procedure E** using TFHZ-Tfs **2** (115.3 mg, 0.36 mmol) and 1-(*tert*-butyldimethylsilyl)-5-methoxy-1*H*-indole (78.4 mg, 0.3 mmol) afforded **59** (42.1 mg, 75% yield) as a white solid; mp: 83-85 °C.

**1H NMR** (500 MHz, CDCl3) δ 10.24 (s, 1H), 9.21 (d, *J* = 1.5 Hz, 1H), 8.53 (d, *J* = 1.5 Hz, 1H), 8.08 (d, *J* = 9.0 Hz, 1H), 7.53 (dd, *J* = 9.0, 2.5 Hz, 1H), 7.21 (d, *J* = 2.5 Hz, 1H), 3.97 (s, 3H).

**13C NMR** (150 MHz, CDCl3) δ 191.0, 158.6, 146.98, 146.91, 138.3, 131.0, 128.8, 128.3, 125.6, 106.3, 55.7.

**HRMS** (ESI) m/z calcd. for C11H10NO2+ [M + H]+ 188.0706, found 188.0704.

-----------------------------------------------------------------------------------------------------------------------------------------------------------------------------------------------

**(60) 6-Bromoquinoline-3-carbaldehyde**

Prepared according to **General Procedure E** using TFHZ-Tfs **2** (115.3 mg, 0.36 mmol) and 5-bromo-1-(*tert*-butyldimethylsilyl)-1*H*-indole (93.1 mg, 0.3 mmol) afforded **60** (62.3 mg, 88% yield) as a white solid; mp: 163-164 °C.

**1H NMR** (500 MHz, CDCl3) δ 10.25 (s, 1H), 9.36 (s, 1H), 8.53 (s, 1H), 8.14 (d, *J* = 2.0 Hz, 1H), 8.05 (d, *J* = 9.0 Hz, 1H), 7.93 (dd, *J* = 9.0, 2.0 Hz, 1H).

**13C NMR** (125 MHz, CDCl3) δ 190.3, 149.4, 149.1, 138.7, 136.0, 131.4, 131.2, 129.1, 128.2, 121.9.

**HRMS** (ESI) m/z calcd. for C10H7BrNO+ [M + H]+ 235.9706, found 235.9703.

-----------------------------------------------------------------------------------------------------------------------------------------------------------------------------------------------

**(61) 6-Phenylquinoline-3-carbaldehyde**

Prepared according to **General Procedure E** using TFHZ-Tfs **2** (115.3 mg, 0.36 mmol) and 1-(*tert*-butyldimethylsilyl)-5-phenyl-1*H*-indole (92.3 mg, 0.3 mmol) afforded **61** (54.6 mg, 78% yield) as a white solid; mp: 70-72 °C.

**1H NMR** (500 MHz, CDCl3) δ 10.27 (s, 1H), 9.35 (d, *J* = 1.5 Hz, 1H), 8.68 (d, *J* = 1.5 Hz, 1H), 8.25 (d, *J* = 9.0 Hz, 1H), 8.17-8.12 (m, 2H), 7.72 (d, *J* = 7.5 Hz, 2H), 7.53 (t, *J* = 7.5 Hz, 2H), 7.45 (t, *J* = 7.0 Hz, 1H).

**13C NMR** (125 MHz, CDCl3) δ 190.7, 149.9, 149.0, 140.8, 140.2, 139.5, 132.4, 130.1, 129.1, 129.0, 128.2, 127.5, 127.3, 126.8.

**HRMS** (ESI) m/z calcd. for C16H12NO+ [M + H]+ 234.0913, found 234.0911.

-----------------------------------------------------------------------------------------------------------------------------------------------------------------------------------------------

**(62) Methyl 3-formylquinoline-6-carboxylate**

Prepared according to **General Procedure E** using TFHZ-Tfs **2** (115.3 mg, 0.36 mmol) and 1-(*tert*-butyldimethylsilyl)-1*H*-indole-5-carboxylate (86.8 mg, 0.3 mmol) afforded **62** (57.4 mg, 89% yield) as a white solid; mp: 146-148 °C.

**1H NMR** (500 MHz, CDCl3) δ 10.28 (s, 1H), 9.45 (d, *J* = 2.0 Hz, 1H), 8.75 (d, *J* = 2.0 Hz, 1H), 8.73 (d, *J* =2.0 Hz, 1H), 8.46 (dd, *J* = 9.0, 2.0 Hz, 1H), 8.24 (d, *J* = 9.0 Hz, 1H), 4.03 (s, 3H).

**13C NMR** (125 MHz, CDCl3) δ 190.2, 166.0, 152.2, 151.1, 141.1, 132.3, 132.0, 130.1, 129.5, 129.1, 126.3, 52.7.

**HRMS** (ESI) m/z calcd. for C12H10NO3+ [M + H]+ 216.0655, found 216.0656.

-----------------------------------------------------------------------------------------------------------------------------------------------------------------------------------------------

**(63) 6-(Phenylethynyl)quinoline-3-carbaldehyde**

Prepared according to **General Procedure E** using TFHZ-Tfs **2** (115.3 mg, 0.36 mmol) and 1-(*tert*-butyldimethylsilyl)-5-(phenylethynyl)-1*H*-indole (99.5 mg, 0.3 mmol) afforded **63** (62.5 mg, 81% yield) as a white solid; mp: 105-107 °C.

**1H NMR** (500 MHz, CDCl3) δ 10.26 (s, 1H), 9.35 (s, 1H), 8.59 (s, 1H), 8.17-8.13 (m, 2H), 7.97 (d, *J* = 9.0 Hz, 1H), 7.62-7.55 (m, 2H), 7.42-7.35 (m, 3H).

**13C NMR** (125 MHz, CDCl3) δ 190.5, 149.9, 149.6, 139.5, 135.2, 132.2, 131.8, 129.9, 129.1, 128.9, 128.5, 126.9, 123.2, 122.5, 91.9, 88.2.

**HRMS** (ESI) m/z calcd. for C18H12NO+ [M + H]+ 258.0913, found 258.0912.

-----------------------------------------------------------------------------------------------------------------------------------------------------------------------------------------------

**(64) 7-(Benzyloxy)quinoline-3-carbaldehyde**

Prepared according to **General Procedure E** using TFHZ-Tfs **2** (115.3 mg, 0.36 mmol) and 6-(benzyloxy)-1-(*tert*-butyldimethylsilyl)-1*H*-indole (101.3 mg, 0.3 mmol) afforded **64** (62.4 mg, 79% yield) as a white solid; mp: 125-127 °C.

**1H NMR** (500 MHz, CDCl3) δ 10.19 (s, 1H), 9.27 (d, *J* = 1.5 Hz, 1H), 8.54 (d, *J* = 1.5 Hz, 1H), 7.88 (d, *J* = 9.0 Hz, 1H), 7.57 (d, *J* = 2.0 Hz, 1H), 7.49 (d, *J* = 7.5 Hz, 2H), 7.42 (t, *J* = 7.0 Hz, 2H), 7.39-7.34 (m, 2H), 5.25 (s, 2H).

**13C NMR** (125 MHz, CDCl3) δ 190.5, 162.4, 152.7, 150.0, 139.1, 135.7, 130.6, 128.7, 128.4, 127.7, 127.1, 122.3, 121.6, 108.9, 70.5.

**HRMS** (ESI) m/z calcd. for C17H14NO2+ [M + H]+ 264.1019, found 264.1015.

-----------------------------------------------------------------------------------------------------------------------------------------------------------------------------------------------

**(65) 8-Fluoroquinoline-3-carbaldehyde**

Prepared according to **General Procedure E** using TFHZ-Tfs **2** (115.3 mg, 0.36 mmol) and 1-(*tert*-butyldimethylsilyl)-7-fluoro-1*H*-indole (74.8 mg, 0.3 mmol) afforded **65** (39.4 mg, 75% yield) as a white solid; mp: 91-93 °C.

**1H NMR** (600 MHz, CDCl3) δ 10.27 (s, 1H), 9.39 (d, *J* = 2.0 Hz, 1H), 8.66 (t, *J* = 1.5 Hz, 1H), 7.80 (d, *J* = 6.5 Hz, 1H), 7.63-7.59 (m, 1H), 7.59-7.54 (m, 1H).

**13C NMR** (150 MHz, CDCl3) δ 190.4, 157.9 (d, *J* = 256.5 Hz), 149.2, 140.4 (d, *J* = 10.5 Hz), 139.6 (d, *J* = 3.0 Hz), 129.2, 128.6 (d, *J* = 1.5 Hz), 127.9 (d, *J* = 7.5 Hz), 125.0 (d, *J* = 4.5 Hz), 116.8 (d, *J* = 19.5 Hz).

**19F NMR** (564 MHz, CDCl3) δ (-123.61)-(-123.70) (m).

**HRMS** (ESI) m/z calcd. for C10H7FNO+ [M + H]+ 176.0506, found 176.0508.

-----------------------------------------------------------------------------------------------------------------------------------------------------------------------------------------------

**(66) [1,3]Dioxolo[4,5-*g*]quinoline-7-carbaldehyde**

Prepared according to **General Procedure E** using TFHZ-Tfs **2** (115.3 mg, 0.36 mmol) and 5-(*tert*-butyldimethylsilyl)-5*H*-[1,3]dioxolo[4,5-*f*]indole (82.6 mg, 0.3 mmol) afforded **66** (47.1 mg, 78% yield) as a white solid; mp: 138-140 °C.

**1H NMR** (500 MHz, CDCl3) δ 10.17 (s, 1H), 9.13 (d, *J* = 2.0 Hz, 1H), 8.42 (d, *J* = 1.5 Hz, 1H), 7.44 (s, 1H), 7.18 (s, 1H), 6.18 (s, 2H).

**13C NMR** (150 MHz, CDCl3) δ 190.7, 153.4, 149.8, 148.9, 148.0, 137.3, 127.4, 124.4, 106.2, 103.9, 102.4.

**HRMS** (ESI) m/z calcd. for C11H8NO3+ [M + H]+ 202.0499, found 202.0497.

-----------------------------------------------------------------------------------------------------------------------------------------------------------------------------------------------

**(67) 7-Bromo-6-fluoroquinoline-3-carbaldehyde**

Prepared according to **General Procedure E** using TFHZ-Tfs **2** (115.3 mg, 0.36 mmol) and 6-bromo-1-(*tert*-butyldimethylsilyl)-5-fluoro-1*H*-indole (98.5 mg, 0.3 mmol) afforded **67** (57.2 mg, 75% yield) as a white solid; mp: 163-165 °C.

**1H NMR** (600 MHz, CDCl3) δ 10.26 (s, 1H), 9.33 (d, *J* = 1.5 Hz, 1H), 8.57 (d, *J* = 1.5 Hz, 1H), 8.48 (d, *J* = 6.6 Hz, 1H), 7.67 (d, *J* = 8.4 Hz, 1H).

**13C NMR** (150 MHz, CDCl3) δ 190.1, 157.3 (d, *J* = 250.5 Hz), 149.5 (d, *J* = 3.0 Hz), 147.7, 138.9 (d, *J* = 6.0 Hz), 135.1, 129.1, 126.9 (d, *J* = 9.0 Hz), 117.1(d, *J* = 24.0 Hz), 112.9(d, *J* = 22.5 Hz).

**19F NMR** (564 MHz, CDCl3) δ (-105.64)-(-105.71) (m).

**HRMS** (ESI) m/z calcd. for C10H6BrFNO+ [M + H]+ 253.9611, found 253.9612.

-----------------------------------------------------------------------------------------------------------------------------------------------------------------------------------------------

**(68) (*E*)-3,7-Dimethylocta-2,6-dien-1-yl 3-formylquinoline-7-carboxylate**

Prepared according to **General Procedure E** using TFHZ-Tfs **2** (115.3 mg, 0.36 mmol) and (*E*)-3,7-dimethylocta-2,6-dien-1-yl 1-(*tert*-butyldimethylsilyl)-1*H*-indole-6-carboxylate (123.5 mg, 0.3 mmol) afforded **68** (76.9 mg, 76% yield) as a white solid; mp: 88-90 °C.

**1H NMR** (500 MHz, CDCl3) δ 10.29 (s, 1H), 9.43 (d, *J* = 1.5 Hz, 1H), 8.89 (s, 1H), 8.66 (d, *J* = 1.5 Hz, 1H), 8.26 (dd, *J* = 8.5, 1.5 Hz, 1H), 8.05 (d, *J* = 8.5 Hz, 1H), 5.52 (t, *J* = 7.0 Hz, 1H), 5.13-5.06 (m, 1H), 4.93 (d, *J* = 7.0 Hz, 2H), 2.19-2.04 (m, 4H), 1.80 (s, 3H), 1.67 (s, 3H), 1.61 (s, 3H).

**13C NMR** (150 MHz, CDCl3) δ 190.5, 165.7, 150.0, 149.8, 143.2, 139.7, 134.1, 132.0, 131.9, 129.5, 129.3, 127.4, 123.6, 117.8, 62.6, 39.5, 26.3, 25.7, 17.7, 16.6.

**HRMS** (ESI) m/z calcd. for C21H24NO3+ [M + H]+ 338.1751, found 338.1751.

-----------------------------------------------------------------------------------------------------------------------------------------------------------------------------------------------

**(69) (4-(Prop-1-en-2-yl)cyclohex-1-en-1-yl)methyl 3-formylquinoline-7-carboxylate**

Prepared according to **General Procedure E** using TFHZ-Tfs **2** (115.3 mg, 0.36 mmol) and (4-(prop-1-en-2-yl)cyclohex-1-en-1-yl)methyl 1-(*tert*-butyldimethylsilyl)-1*H*-indole-6-carboxylate (122.9 mg, 0.3 mmol) afforded **69** (68.4 mg, 68% yield) as a white solid; mp: 97-99 °C.

**1H NMR** (500 MHz, CDCl3) δ 10.30 (s, 1H), 9.44 (d, *J* = 1.5 Hz, 1H), 8.90 (s, 1H), 8.68 (d, *J* = 1.5 Hz, 1H), 8.27 (dd, *J* = 8.5, 1.5 Hz, 1H), 8.07 (d, *J* = 8.5 Hz, 1H), 5.91 (s, 1H), 4.86-4.77 (m,2H), 4.76-4.72 (m, 2H), 2.28-2.14 (m, 4H), 2.08-1.96 (m, 1H), 1.94-1.85 (m, 1H), 1.76 (s, 3H), 1.61-1.49 (m, 1H).

**13C NMR** (125 MHz, CDCl3) δ 190.4, 165.6, 150.0, 149.9, 149.5, 139.7, 134.0, 132.3, 132.0, 129.62, 129.59, 129.4, 127.4, 126.5, 108.9, 69.7, 40.8, 30.5, 27.3, 26.5, 20.8.

**HRMS** (ESI) m/z calcd. for C21H22NO3+ [M + H]+ 336.1594, found 336.1596.

-----------------------------------------------------------------------------------------------------------------------------------------------------------------------------------------------

**(70) 3-(*p*-Tolyl)quinoline**

Prepared according to **General Procedure F** using *N*-triftosylhydrazone (102.6 mg, 0.3 mmol) derived from 4-methylbenzaldehyde and *N*-TBS indole (138.6 mg, 0.6 mmol) afforded **70** (63.7 mg, 97% yield) as a white solid; mp: 79-80 °C.

**1H NMR** (500 MHz, CDCl3) δ 9.18 (s, 1H), 8.26 (s, 1H), 8.14 (d, *J* = 8.5 Hz, 1H), 7.85 (d, *J* = 8.0 Hz, 1H), 7.70 (t, *J* = 7.5 Hz, 1H), 7.61 (d, *J* = 7.5 Hz, 2H), 7.56 (t, *J* = 7.5 Hz, 1H), 7.33 (d, *J* = 7.5 Hz, 2H), 2.43 (s, 3H).

**13C NMR** (150 MHz, CDCl3) δ 149.9, 147.2, 138.0, 134.9, 133.7, 132.7, 129.8, 129.2, 129.1, 128.0, 127.9, 127.2, 126.9, 21.1.

**HRMS** (ESI) m/z calcd. for C16H14N+ [M + H]+ 220.1121, found 220.1124.

-----------------------------------------------------------------------------------------------------------------------------------------------------------------------------------------------

**(71) 3-Phenylquinoline**

Prepared according to **General Procedure F** using *N*-triftosylhydrazone (98.4 mg, 0.3 mmol) derived from benzaldehyde and *N*-TBS indole (138.6 mg, 0.6 mmol) afforded **71** (54.1 mg, 88% yield) as a white solid; mp: 52-54 °C.

**1H NMR** (500 MHz, CDCl3) δ 9.19 (d, *J* = 2.5 Hz, 1H), 8.29 (d, *J* = 1.5 Hz, 1H), 8.15 (d, *J* = 8.5 Hz, 1H), 7.87 (d, *J* = 8.0 Hz, 1H), 7.75-7.68 (m, 3H), 7.57 (t, *J* = 7.5 Hz, 1H), 7.52 (t, *J* = 7.5 Hz, 2H), 7.44 (t, *J* = 7.4 Hz, 1H).

**13C NMR** (150 MHz, CDCl3) δ 149.9, 147.3, 137.8, 133.8, 133.2, 129.3, 129.2, 129.1, 128.1, 128.0, 127.9, 127.4, 127.0.

**HRMS** (ESI) m/z calcd. for C15H12N+ [M + H]+ 206.0964, found 206.0966.

-----------------------------------------------------------------------------------------------------------------------------------------------------------------------------------------------

**(72) 3-([1,1'-Biphenyl]-4-yl)quinoline**

Prepared according to **General Procedure G** using *N*-triftosylhydrazone (121.2 mg, 0.3 mmol) derived from [1,1'-biphenyl]-4-carbaldehyde and *N*-TBS indole (138.6 mg, 0.6 mmol) afforded **72** (66.6 mg, 79% yield) as a white solid; mp: 145-147 °C.

**1H NMR** (500 MHz, CDCl3) δ 9.25 (d, *J* = 2.5 Hz, 1H), 8.35 (d, *J* = 2.0 Hz, 1H), 8.17 (d, *J* = 8.5 Hz, 1H), 7.90 (d, *J* = 8.0 Hz, 1H), 7.81 (d, *J* = 8.5 Hz, 2H), 7.76 (d, *J* = 8.5 Hz, 2H), 7.75-7.71 (m, 1H), 7.67 (d, *J* = 7.5 Hz, 2H), 7.59 (t, *J* = 7.5 Hz, 1H), 7.49 (t, *J* = 7.5 Hz, 2H), 7.40 (t, *J* = 7.5 Hz, 1H).

**13C NMR** (150 MHz, CDCl3) δ 149.8, 147.4, 141.0, 140.4, 136.7, 133.3, 133.0, 129.4, 129.3, 128.9, 128.04, 127.99, 127.9, 127.7, 127.6, 127.1, 127.0.

**HRMS** (ESI) m/z calcd. for C21H16N+ [M + H]+ 282.1277, found 282.1279.

-----------------------------------------------------------------------------------------------------------------------------------------------------------------------------------------------

**(73) 3-(4-(Trifluoromethyl)phenyl)quinoline**

Prepared according to **General Procedure F** using *N*-triftosylhydrazone (118.8 mg, 0.3 mmol) derived from 4-(trifluoromethyl)benzaldehyde and *N*-TBS indole (138.6 mg, 0.6 mmol) afforded **73** (47.5 mg, 58% yield) as a white solid; mp: 136-137 °C.

**1H NMR** (500 MHz, CDCl3) δ 9.18 (d, *J* = 2.0 Hz, 1H), 8.35 (d, *J* = 2.0 Hz, 1H), 8.18 (d, *J* = 8.5 Hz, 1H), 7.92 (d, *J* = 8.0 Hz, 1H), 7.83 (d, *J* = 8.0 Hz, 2H), 7.81-7.75 (m, 3H), 7.62 (t, *J* = 7.5 Hz, 1H).

**13C NMR** (125 MHz, CDCl3) δ 149.3, 147.6, 141.4, 134.0, 132.5, 130.3 (q, *J* = 32.5 Hz), 130.1, 129.2, 128.1, 127.83, 127.75, 127.4, 126.1 (q, *J* = 3.8 Hz), 124.1 (q, *J* = 271.3 Hz).

**19F NMR** (564 MHz, CDCl3) δ -62.55.

**HRMS** (ESI) m/z calcd. for C16H11F3N+ [M + H]+ 274.0838, found 274.0840.

-----------------------------------------------------------------------------------------------------------------------------------------------------------------------------------------------

**(74) 3-(4-(Trifluoromethoxy)phenyl)quinoline**

Prepared according to **General Procedure F** using *N*-triftosylhydrazone (123.6 mg, 0.3 mmol) derived from 4-(trifluoromethoxy)benzaldehyde and *N*-TBS indole (138.6 mg, 0.6 mmol) afforded **74** (70.2 mg, 81% yield) as a white solid; mp: 86-88 °C.

**1H NMR** (500 MHz, CDCl3) δ 9.14 (s, 1H), 8.27 (d, *J* = 1.0 Hz, 1H), 8.15 (d, *J* = 8.5 Hz, 1H), 7.87 (d, *J* = 8.0 Hz, 1H), 7.76-7.70 (m, 3H), 7.59 (t, *J* = 7.5 Hz, 1H), 7.37 (d, *J* = 8.5 Hz, 2H).

**13C NMR** (125 MHz, CDCl3) δ 149.4, 149.2 (q, *J* = 1.3 Hz), 147.4, 136.5, 133.4, 132.5, 129.7, 129.2, 128.8, 128.0, 127.8, 127.2, 121.6, 120.5 (q, *J* = 256.3 Hz)

19F NMR (470 MHz, CDCl3) δ -57.78.

**HRMS** (ESI) m/z calcd. for C16H11F3NO+ [M + H]+ 290.0787, found 290.0782.

-----------------------------------------------------------------------------------------------------------------------------------------------------------------------------------------------

**(75) 4-(Quinolin-3-yl)phenol**

Prepared according to **General Procedure H** using *N*-triftosylhydrazone (137.4 mg, 0.3 mmol) derived from 4-((*tert*-butyldimethylsilyl)oxy)benzaldehyde and *N*-TBS indole (138.6 mg, 0.6 mmol) afforded **75** (42.4 mg, 64% yield) as a pale yellow solid; mp: 225-227 °C.

**1H NMR** (500 MHz, DMSO-*d*6) δ 9.76 (s, 1H), 9.20 (s, 1H), 8.51 (s, 1H), 8.01 (t, *J* = 8.0 Hz, 2H), 7.79-7.66 (m, 3H), 7.61 (t, *J* = 7.5 Hz, 1H), 6.94 (d, *J* = 8.5 Hz, 2H).

**13C NMR** (150 MHz, DMSO-*d*6) δ 157.9, 149.4, 146.4, 132.9, 131.4, 129.1, 128.7, 128.5, 128.3, 127.9, 127.8, 127.0, 116.2.

**HRMS** (ESI) m/z calcd. for C15H12NO+ [M + H]+ 222.0913, found 222.0912.

-----------------------------------------------------------------------------------------------------------------------------------------------------------------------------------------------

**(76) 3-(3-Bromophenyl)quinoline**

Prepared according to **General Procedure F** using *N*-triftosylhydrazone (122.1 mg, 0.3 mmol) derived from 3-bromobenzaldehyde and *N*-TBS indole (138.6 mg, 0.6 mmol) afforded **76** (45.0 mg, 53% yield) as a white solid; mp: 88-90 °C.

**1H NMR** (600 MHz, CDCl3) δ 9.13 (d, *J* = 2.4 Hz, 1H), 8.27 (d, *J* = 1.8 Hz, 1H), 8.15 (d, *J* = 8.4 Hz, 1H), 7.88 (d, *J* = 7.8 Hz, 1H), 7.86-7.83 (m, 1H), 7.76-7.72 (m, 1H), 7.63 (d, *J* = 7.8 Hz, 1H), 7.59 (t, *J* = 7.8 Hz, 1H), 7.57-7.54 (m, 1H), 7.39 (t, *J* = 7.8 Hz, 1H).

**13C NMR** (150 MHz, CDCl3) δ 149.4, 147.5, 140.0, 133.5, 132.4, 131.1, 130.6, 130.4, 129.8, 129.2, 128.0, 127.8, 127.2, 126.0, 123.3.

**HRMS** (ESI) m/z calcd. for C15H11BrN+ [M + H]+ 284.0069, found 284.0062.

-----------------------------------------------------------------------------------------------------------------------------------------------------------------------------------------------

**(77) 3-(2-(Benzyloxy)phenyl)quinoline**

Prepared according to **General Procedure F** using *N*-triftosylhydrazone (130.2 mg, 0.3 mmol) derived from 2-(benzyloxy)benzaldehyde and *N*-TBS indole (138.6 mg, 0.6 mmol) afforded **77** (81.2 mg, 87% yield) as a white solid; mp: 110-112 °C.

**1H NMR** (600 MHz, CDCl3) δ 9.17 (s, 1H), 8.28 (d, *J* = 1.8 Hz, 1H), 8.13 (d, *J* = 8.4 Hz, 1H), 7.78 (d, *J* = 8.4 Hz, 1H), 7.70-7.66 (m, 1H), 7.52 (t, *J* = 7.5 Hz, 1H), 7.44 (dd, *J* = 7.2, 1.2 Hz, 1H), 7.37-7.33 (m, 1H), 7.32-7.26 (m, 4H), 7.25-7.21 (m, 1H), 7.11-7.06 (m, 2H), 5.10 (s, 2H).

**13C NMR** (150 MHz, CDCl3) δ 155.8, 151.9, 146.8, 136.6, 135.6, 131.6, 131.0, 129.5, 129.10, 129.05, 128.5, 127.9, 127.8, 127.7, 127.6, 126.9, 126.5, 121.5, 113.1, 70.5.

**HRMS** (ESI) m/z calcd. for C22H18NO+ [M + H]+ 312.1383, found 312.1380.

-----------------------------------------------------------------------------------------------------------------------------------------------------------------------------------------------

**(78) 3-(3,4-Dichlorophenyl)quinoline**

Prepared according to **General Procedure F** using *N*-triftosylhydrazone (119.1 mg, 0.3 mmol) derived from 3,4-dichlorobenzaldehyde and *N*-TBS indole (138.6 mg, 0.6 mmol) afforded **78** (41.9 mg, 51% yield) as a white solid; mp: 159-160 °C.

**1H NMR** (500 MHz, CDCl3) δ9.11 (d, *J* = 2.0 Hz, 1H), 8.28 (d, *J* = 1.5 Hz, 1H), 8.15 (d, *J* = 8.5 Hz, 1H), 7.89 (d, *J* = 8.0 Hz, 1H), 7.80 (d, *J* = 2.0 Hz, 1H), 7.78-7.30 (m, 1H), 7.64-7.57 (m, 2H), 7.56-7.51 (m, 1H).

**13C NMR** (125 MHz, CDCl3) δ 149.1, 147.6, 137.9, 133.44, 133.40, 132.5, 131.5, 131.1, 130.0, 129.3, 129.2, 128.0, 127.7, 127.4, 126.6.

**HRMS** (ESI) m/z calcd. for C15H10Cl2N+ [M + H]+ 274.0185, found 274.0186.

-----------------------------------------------------------------------------------------------------------------------------------------------------------------------------------------------

**(79) 3-(2,3-Dihydrobenzo[*b*][1,4]dioxin-6-yl)quinoline**

Prepared according to **General Procedure F** using *N*-triftosylhydrazone (115.8 mg, 0.3 mmol) derived from 2,3-dihydrobenzo[*b*][1,4]dioxine-6-carbaldehyde and *N*-TBS indole (138.6 mg, 0.6 mmol) afforded **79** (77.3 mg, 98% yield) as a white solid; mp: 98-100 °C.

**1H NMR** (500 MHz, CDCl3) δ9.12 (d, *J* = 2.5 Hz, 1H), 8.19 (d, *J* = 2.0 Hz, 1H), 8.11 (d, *J* = 8.5 Hz, 1H), 7.82 (d, *J* = 8.0 Hz, 1H), 7.70-7.63 (m, 1H), 7.53 (t, *J* = 7.5 Hz, 1H), 7.22 (d, *J* = 2.0 Hz, 1H), 7.18 (dd, *J* = 8.5, 2.5 Hz, 1H), 6.99 (d, *J* = 8.5 Hz, 1H), 4.29 (s, 4H).

**13C NMR** (150 MHz, CDCl3) δ 149.7, 147.0, 144.0, 143.8, 133.1, 132.4, 131.2, 129.1, 129.0, 128.0, 127.8, 126.8, 120.3, 118.0, 116.0, 64.4, 64.3.

**HRMS** (ESI) m/z calcd. for C17H14NO2+ [M + H]+ 264.1019, found 264.1022.

-----------------------------------------------------------------------------------------------------------------------------------------------------------------------------------------------

**(80) 3-(3,4,5-Trimethoxyphenyl)quinoline**

Prepared according to **General Procedure F** using *N*-triftosylhydrazone (125.4 mg, 0.3 mmol) derived from 3,4,5-trimethoxybenzaldehyde and *N*-TBS indole (138.6 mg, 0.6 mmol) afforded **80** (67.2 mg, 76% yield) as a white solid; mp: 99-100 °C.

**1H NMR** (500 MHz, CDCl3) δ9.14 (d, *J* = 2.0 Hz, 1H), 8.25 (d, *J* = 2.0 Hz, 1H), 8.14 (d, *J* = 8.5 Hz, 1H), 7.88 (d, *J* = 8.0 Hz, 1H), 7.75-7.68 (m, 1H), 7.61-7.55 (m, 1H), 6.88 (s, 2H), 3.97 (s, 6H), 3.94 (s, 3H).

**13C NMR** (150 MHz, CDCl3) δ 153.7, 149.8, 147.3, 138.2, 133.9, 133.7, 133.0, 129.4, 129.2, 127.89, 127.87, 127.1, 104.8, 61.1, 56.3.

**HRMS** (ESI) m/z calcd. for C18H18NO3+ [M + H]+ 296.1281, found 296.1283.

-----------------------------------------------------------------------------------------------------------------------------------------------------------------------------------------------

**(81) 3-(Naphthalen-2-yl)quinoline**

Prepared according to **General Procedure F** using *N*-triftosylhydrazone (113.4 mg, 0.3 mmol) derived from 2-naphthaldehyde and *N*-TBS indole (138.6 mg, 0.6 mmol) afforded **81** (62.7 mg, 82% yield) as a white solid; mp: 111-113 °C.

**1H NMR** (500 MHz, CDCl3) δ9.32 (d, *J* = 2.5 Hz, 1H), 8.41 (d, *J* = 1.0 Hz, 1H), 8.21-8.15 (m, 2H), 8.00 (d, *J* = 8.5 Hz, 1H), 7.97-7.93 (m, 1H), 7.93-7.88 (m, 2H), 7.84 (dd, *J* = 8.5, 1.5 Hz, 1H), 7.77-7.71 (m, 1H), 7.60 (t, *J* = 7.5 Hz, 1H), 7.58-7.51 (m, 2H).

**13C NMR** (150 MHz, CDCl3) δ 150.1, 147.4, 135.1, 133.73, 133.65, 133.4, 132.9, 129.4, 129.3, 129.0, 128.3, 128.1, 128.0, 127.7, 127.0, 126.6, 126.5, 126.4, 125.2.

**HRMS** (ESI) m/z calcd. for C19H14N+ [M + H]+ 256.1121, found 256.1123.

-----------------------------------------------------------------------------------------------------------------------------------------------------------------------------------------------

**(82) 3-(Furan-3-yl)quinoline**

Prepared according to **General Procedure F** using *N*-triftosylhydrazone (95.4 mg, 0.3 mmol) derived from furan-3-carbaldehyde and *N*-TBS indole (138.6 mg, 0.6 mmol) afforded **82** (30.4 mg, 52% yield) as a white solid; mp: 75-78 °C.

**1H NMR** (500 MHz, CDCl3) δ 9.22 (d, *J* = 2.0 Hz, 1H), 8.36 (d, *J* = 1.5 Hz, 1H), 8.09 (d, *J* = 8.5 Hz, 1H), 7.84 (d, *J* = 8.0 Hz, 1H), 7.70-7.64 (m, 1H), 7.59-7.51 (m, 2H), 6.87 (d, *J* = 3.5 Hz, 1H), 6.57-6.52 (m, 1H).

**13C NMR** (150 MHz, CDCl3) δ 151.4, 147.10, 147.08, 143.1, 129.3, 129.2, 129.1, 127.94, 127.87, 127.2, 124.1, 112.0, 106.7.

**HRMS** (ESI) m/z calcd. for C13H10NO+ [M + H]+ 196.0757, found 196.0762.

-----------------------------------------------------------------------------------------------------------------------------------------------------------------------------------------------

**(83) 3-(Benzofuran-3-yl)quinoline**

Prepared according to **General Procedure F** using *N*-triftosylhydrazone (110.4 mg, 0.3 mmol) derived from benzofuran-3-carbaldehyde and *N*-TBS indole (138.6 mg, 0.6 mmol) afforded **83** (52.9 mg, 72% yield) as a white solid; mp: 108-109 °C.

**1H NMR** (500 MHz, CDCl3) δ 9.21 (d, *J* = 2.0 Hz, 1H), 8.40 (d, *J* = 2.0 Hz, 1H), 8.17 (d, *J* = 8.5 Hz, 1H), 7.97 (s, 1H), 7.92-7.87 (m, 2H), 7.77-7.72 (m, 1H), 7.63-7.57 (m, 2H), 7.45-7.35 (m, 2H).

**13C NMR** (150 MHz, CDCl3) δ 155.8, 149.8, 147.4, 142.0, 133.2, 129.41, 129.36, 128.1, 127.8, 127.2, 126.1, 125.4, 125.1, 123.4, 120.0, 119.1, 112.0.

**HRMS** (ESI) m/z calcd. for C17H12NO+ [M + H]+ 246.0913, found 246.0917.

-----------------------------------------------------------------------------------------------------------------------------------------------------------------------------------------------

**(84) 3-(Benzo[*b*]thiophen-3-yl)quinoline**

Prepared according to **General Procedure G** using *N*-triftosylhydrazone (115.2 mg, 0.3 mmol) derived from benzo[*b*]thiophene-3-carbaldehyde and *N*-TBS indole (138.6 mg, 0.6 mmol) afforded **84** (67.3 mg, 86% yield) as a white solid; mp: 108-110 °C.

**1H NMR** (500 MHz, CDCl3) δ 9.16 (d, *J* = 2.0 Hz, 1H), 8.33 (d, *J* = 2.0 Hz, 1H), 8.19 (d, *J* = 8.5 Hz, 1H), 7.99-7.90 (m, 2H), 7.88 (d, *J* = 8.0 Hz, 1H), 7.79-7.73 (m, 1H), 7.63-757 (m, 1H), 7.56 (s, 1H), 7.47-7.40 (m, 2H).

**13C NMR** (150 MHz, CDCl3) δ 150.8, 147.4, 140.7, 137.6, 134.7, 134.4, 129.5, 129.3, 129.0, 127.9, 127.8, 127.1, 125.0, 124.8, 124.7, 123.1, 122.4.

**HRMS** (ESI) m/z calcd. for C17H12NS+ [M + H]+ 262.0685, found 262.0693.

-----------------------------------------------------------------------------------------------------------------------------------------------------------------------------------------------

**(85) 3-(Thiophen-2-yl)quinoline**

Prepared according to **General Procedure I** using *N*-triftosylhydrazone (100.2 mg, 0.3 mmol) derived from thiophene-2-carbaldehyde and *N*-TBS indole (138.6 mg, 0.6 mmol) afforded **85** (53.2 mg, 84% yield) as a white solid; mp: 67-68 °C.

**1H NMR** (500 MHz, CDCl3) δ 9.20 (d, *J* = 2.0 Hz, 1H), 8.24 (d, *J* = 2.0 Hz, 1H), 8.09 (d, *J* = 8.5 Hz, 1H), 7.81 (d, *J* = 8.0 Hz, 1H), 7.70-7.65 (m, 1H), 7.57-7.51 (m, 1H), 7.48 (d, *J* = 3.5 Hz, 1H), 7.38 (dd, *J* = 3.5, 1.0 Hz, 1H), 7.15 (d, *J* = 5.0, 4.0 Hz, 1H).

**13C NMR** (125 MHz, CDCl3) δ 148.6, 147.2, 140.7, 131.3, 129.3, 128.4, 127.9, 127.8, 127.5, 127.2, 126.0, 124.4.

**HRMS** (ESI) m/z calcd. for C13H10NS+ [M + H]+ 212.0528, found 212.0529.

-----------------------------------------------------------------------------------------------------------------------------------------------------------------------------------------------

**(86) 3-(Pyridin-3-yl)quinoline**

Prepared according to **General Procedure J** using *N*-triftosylhydrazone (98.7 mg, 0.3 mmol) derived from nicotinaldehyde and *N*-TBS indole (138.6 mg, 0.6 mmol) afforded **86** (21.6 mg, 35% yield) as a white solid; mp: 118-120 °C.

**1H NMR** (500 MHz, CDCl3) δ 9.15 (d, *J* = 2.0 Hz, 1H), 8.97 (d, *J* = 1.5 Hz, 1H), 8.71-8.65 (m, 1H), 8.32 (d, *J* = 1.0 Hz, 1H), 8.15 (d, *J* = 8.5 Hz, 1H), 8.03-7.97 (m, 1H), 7.90 (d, *J* = 8.0 Hz, 1H), 7.79-7.72 (m, 1H), 7.64-7.57 (m, 1H), 7.45 (dd, *J* = 7.5, 5.0 Hz, 1H).

**13C NMR** (125 MHz, CDCl3) δ 149.3, 149.2, 148.5, 147.7, 134.6, 133.62, 133.58, 130.6, 129.9, 129.3, 128.0, 127.8, 127.3, 123.8.

**HRMS** (ESI) m/z calcd. for C14H11N2+ [M + H]+ 207.0917, found 207.0917.

-----------------------------------------------------------------------------------------------------------------------------------------------------------------------------------------------

**(87) 3-Vinylquinoline**

Prepared according to **General Procedure J** using *N*-triftosylhydrazone (166.8 mg, 0.6 mmol) derived from acrylaldehyde and *N*-TBS indole (69.3 mg, 0.3 mmol) afforded **87** (35.3 mg, 76% yield) as a pale yellow oil.

**1H NMR** (500 MHz, CDCl3) δ 9.03 (d, *J* = 1.5 Hz, 1H), 8.11-8.05 (m, 2H), 7.80 (d, *J* = 8.0 Hz, 1H), 7.71-7.65 (m, 1H), 7.56-7.51 (m, 1H), 6.87 (dd, *J* = 18.0, 11.0 Hz, 1H), 5.99 (d, *J* = 18.0 Hz, 1H), 5.47 (d, *J* = 11.0 Hz, 1H).

**13C NMR** (125 MHz, CDCl3) δ 149.1, 147.6, 133.8, 132.5, 130.3, 129.3, 129.2, 128.0, 127.9, 126.9, 116.4.

**HRMS** (ESI) m/z calcd. for C11H0N+ [M + H]+ 156.0808, found 156.0808.

-----------------------------------------------------------------------------------------------------------------------------------------------------------------------------------------------

**(88) 3-(Undec-1-en-1-yl)quinoline**

Prepared according to **General Procedure J** using *N*-triftosylhydrazone (121.2 mg, 0.3 mmol) derived from dodec-2-enal and *N*-TBS indole (138.6 mg, 0.6 mmol) afforded **88** (74.2 mg, 88% yield) as a pale yellow oil.

**1H NMR** (500 MHz, CDCl3) δ 8.97 (d, *J* = 2.0 Hz, 1H), 8.05 (d, *J* = 8.5 Hz, 1H), 7.97 (d, *J* = 1.5 Hz, 1H), 7.76 (d, *J* = 8.0 Hz, 1H), 7.66-7.61 (m, 1H), 7.53-7.47 (m, 1H), 6.52 (d, *J* = 16.0 Hz, 1H), 6.47 (dt, *J* = 16.0, 6.5 Hz, 1H), 2.28 (q, *J* = 7.0 Hz, 2H), 1.56-1.47 (m, 2H), 1.42-1.20 (m, 14H), 0.88 (t, *J* = 6.8 Hz, 3H).

**13C NMR** (150 MHz, CDCl3) δ 149.4, 147.2, 134.0, 131.4, 130.8, 129.2, 128.7, 128.2, 127.6, 126.7, 126.5, 33.3, 31.9, 29.6, 29.5, 29.31, 29.25, 29.2, 22.7, 14.1.

**HRMS** (ESI) m/z calcd. for C20H28N+ [M + H]+ 282.2216, found 282.2218.

-----------------------------------------------------------------------------------------------------------------------------------------------------------------------------------------------

**(89) 3-(Undec-1-en-1-yl)quinoline**

Prepared according to **General Procedure J** using *N*-triftosylhydrazone (91.8 mg, 0.3 mmol) derived from 3-methylbut-2-enal and *N*-TBS indole (138.6 mg, 0.6 mmol) afforded **89** (47.8 mg, 87% yield) as a pale yellow oil.

**1H NMR** (500 MHz, CDCl3) δ 8.80 (s, 1H), 8.06 (d, *J* = 8.5 Hz, 1H), 7.95 (s, 1H), 7.78 (d, *J* = 8.0 Hz, 1H), 7.66 (t, *J* = 7.5 Hz, 1H), 7.52 (t, *J* = 7.5 Hz, 1H), 6.38 (s, 1H), 1.99 (s, 3H), 1.95 (s, 3H).

**13C NMR** (150 MHz, CDCl3) δ 152.0, 146.3, 138.8, 134.1, 131.6, 129.1, 128.7, 127.9, 127.6, 126.6, 121.6, 27.0, 19.6.

**HRMS** (ESI) m/z calcd. for C13H14N+ [M + H]+ 184.1121, found 184.1122.

-----------------------------------------------------------------------------------------------------------------------------------------------------------------------------------------------

**(90) 3-(4-Methoxystyryl)quinoline**

Prepared according to **General Procedure K** using *N*-triftosylhydrazone (115.2 mg, 0.3 mmol) derived from 3-(4-methoxyphenyl)acrylaldehyde and *N*-TBS indole (138.6 mg, 0.6 mmol) afforded **90** (64.2 mg, 82% yield) as a white solid; mp: 98-100 °C.

**1H NMR** (500 MHz, CDCl3) δ 9.11 (d, *J* = 2.0 Hz, 1H), 8.14 (d, *J* = 1.5 Hz, 1H), 8.08 (d, *J* = 8.5 Hz, 1H), 7.81 (d, *J* = 8.0 Hz, 1H), 7.69-7.63 (m, 1H), 7.57-7.50 (m, 3H), 7.29 (d, *J* = 16.5 Hz, 1H), 7.11 (d, *J* = 16.5 Hz, 1H), 6.96-6.91 (m, 2H), 3.85 (s, 3H).

**13C NMR** (150 MHz, CDCl3) δ 159.8, 149.4, 147.2, 131.7, 130.7, 130.4, 129.5, 129.2, 129.0, 128.2, 128.0, 127.7, 126.9, 123.0, 114.3, 55.3.

**HRMS** (ESI) m/z calcd. for C18H16NO+ [M + H]+ 262.1226, found 262.1225.

-----------------------------------------------------------------------------------------------------------------------------------------------------------------------------------------------

**(91) 3-Ethynylquinoline**

Prepared according to **General Procedure H** using *N*-triftosylhydrazone (129.6 mg, 0.3 mmol) derived from 3-(triisopropylsilyl)propiolaldehyde and *N*-TBS indole (138.6 mg, 0.6 mmol) afforded **91** (21.6 mg, 47% yield) as a white solid; mp: 69-70 °C.

**1H NMR** (500 MHz, CDCl3) δ 8.95 (d, *J* = 1.5 Hz, 1H), 8.29 (d, *J* = 1.0 Hz, 1H), 8.10 (d, *J* = 8.0 Hz, 1H), 7.79 (d, *J* = 8.0 Hz, 1H), 7.76-7.71 (m, 1H), 7.60-7.55 (m, 1H), 3.28 (s, 1H).

**13C NMR** (150 MHz, CDCl3) δ 152.3, 147.1, 139.3, 130.4, 129.5, 127.6, 127.4, 127.0, 116.2, 80.9, 80.5.

**HRMS** (ESI) m/z calcd. for C11H8N+ [M + H]+ 154.0651, found 154.0657.

-----------------------------------------------------------------------------------------------------------------------------------------------------------------------------------------------

**(92) 3-Phenethylquinoline**

Prepared according to **General Procedure H** using *N*-triftosylhydrazone (106.8 mg, 0.3 mmol) derived from 3-phenylpropanal and *N*-TBS indole (138.6 mg, 0.6 mmol) afforded **92** (28.0 mg, 40% yield) as a pale yellow oil.

**1H NMR** (500 MHz, CDCl3) δ 8.75 (s, 1H), 8.08 (d, *J* = 8.5 Hz, 1H), 7.87 (s, 1H), 7.74 (d, *J* = 8.0 Hz, 1H), 7.67 (t, *J* = 7.5 Hz, 1H), 7.52 (t, *J* = 7.5 Hz, 1H), 7.29 (t, *J* = 7.5 Hz, 2H), 7.24-7.20 (m, 1H), 7.19 (d, *J* = 7.5 Hz, 2H), 3.16-3.10 (m, 2H), 3.07-3.00 (m, 2H).

**13C NMR** (125 MHz, CDCl3) δ 152.0, 146.9, 140.8, 134.4, 134.2, 129.2, 128.7, 128.5, 128.1, 127.3, 126.6, 126.2, 37.4, 35.1.

**HRMS** (ESI) m/z calcd. for C17H16N+ [M + H]+ 234.1277, found 234.1281.

-----------------------------------------------------------------------------------------------------------------------------------------------------------------------------------------------

**(93) 6-Bromo-3-(*p*-tolyl)quinoline**

Prepared according to **General Procedure F** using *N*-triftosylhydrazone (102.6 mg, 0.3 mmol) derived from 4-methylbenzaldehyde and 5-bromo-1-(*tert*-butyldimethylsilyl)-1*H*-indole (186.0 mg, 0.6 mmol) afforded **93** (82.2 mg, 92% yield) as a white solid; mp: 143-145 °C.

**1H NMR** (500 MHz, CDCl3) δ 9.16 (d, *J* = 2.0 Hz, 1H), 8.15 (d, *J* = 2.0 Hz, 1H), 8.01 (d, *J* = 2.0 Hz, 1H), 7.98 (d, *J* = 9.0 Hz, 1H), 7.75 (dd, *J* = 9.0, 2.0 Hz, 1H), 7.59 (d, *J* = 8.0 Hz, 2H), 7.33 (d, *J* = 8.0 Hz, 2H), 2.44 (s, 3H).

**13C NMR** (150 MHz, CDCl3) δ 150.3, 145.7, 138.4, 134.6, 134.4, 132.6, 131.6, 130.9, 130.0, 129.9, 129.2, 127.2, 120.8, 21.2.

**HRMS** (ESI) m/z calcd. for C16H13BrN+ [M + H]+ 298.0226, found 298.0231.

-----------------------------------------------------------------------------------------------------------------------------------------------------------------------------------------------

**(94) 6-Nitro-3-(*p*-tolyl)quinoline**

Prepared according to **General Procedure F** *N*-triftosylhydrazone (102.6 mg, 0.3 mmol) derived from 4-methylbenzaldehyde and 1-(*tert*-butyldimethylsilyl)-5-nitro-1*H*-indole (165.6 mg, 0.6 mmol) afforded **94** (34.1 mg, 43% yield) as a yellow solide; mp: 183-185 °C.

**1H NMR** (500 MHz, CDCl3) δ 9.33 (d, *J* = 2.0 Hz, 1H), 8.83 (d, *J* = 2.0 Hz, 1H), 8.48-8.41 (m, 2H), 8.25 (d, *J* = 9.0 Hz, 1H), 7.63 (d, *J* = 8.0 Hz, 2H), 7.37 (d, *J* = 8.0 Hz, 2H), 2.45 (s, 3H).

**13C NMR** (150 MHz, CDCl3) δ 153.5, 149.0, 145.9, 139.0, 135.7, 134.0, 133.6, 131.1, 130.2, 127.3, 127.0, 124.6, 122.5, 21.2.

**HRMS** (ESI) m/z calcd. for C16H13N2O2+ [M + H]+ 265.0972, found 265.0974.

-----------------------------------------------------------------------------------------------------------------------------------------------------------------------------------------------

**(95) Methyl 3-(*p*-tolyl)quinoline-6-carboxylate**

Prepared according to **General Procedure F** *N*-triftosylhydrazone (102.6 mg, 0.3 mmol) derived from 4-methylbenzaldehyde and methyl 1-(*tert*-butyldimethylsilyl)-1*H*-indole-5-carboxylate (173.4 mg, 0.6 mmol) afforded **95** (77.3 mg, 93% yield) as a white solid; mp: 123-125 °C.

**1H NMR** (500 MHz, CDCl3) δ 9.23 (s, 1H), 8.61 (s, 1H), 8.33 (s, 1H), 8.26 (d, *J* = 9.0 Hz, 1H), 8.14 (d, *J* = 9.0 Hz, 1H), 7.59 (d, *J* = 8.0 Hz, 2H), 7.33 (d, *J* = 8.0 Hz, 2H), 3.99 (s, 3H), 2.43 (s, 3H).

**13C NMR** (150 MHz, CDCl3) δ 166.6, 152.0, 148.9, 138.4, 134.5, 134.3, 133.7, 131.1, 130.0, 129.5, 128.6, 128.4, 127.22, 127.17, 52.4, 21.1.

**HRMS** (ESI) m/z calcd. for C18H16NO2+ [M + H]+ 278.1176, found 278.1177.

-----------------------------------------------------------------------------------------------------------------------------------------------------------------------------------------------

**(96) 6-(Pyridin-2-yl)-3-(*p*-tolyl)quinoline**

Prepared according to **General ProcedureF** using *N*-triftosylhydrazone (102.6 mg, 0.3 mmol) derived from 4-methylbenzaldehyde and 1-(*tert*-butyldimethylsilyl)-5-(pyridin-2-yl)-1*H*-indole (184.8 mg, 0.6 mmol) afforded **96** (38.2 mg, 43% yield) as a yellow oil.

**1H NMR** (500 MHz, CDCl3) δ 9.19 (d, *J* = 2.0 Hz, 1H), 8.77 (d, *J* = 5.0 Hz, 1H), 8.54 (d, *J* = 1.5 Hz, 1H), 8.37 (d, *J* = 2.0 Hz, 1H), 8.35 (dd, *J* = 8.5, 2.0 Hz, 1H), 8.22 (d, *J* = 8.5 Hz, 1H), 7.90 (d, *J* = 8.0 Hz, 1H), 7.82 (td, *J* = 7.5, 1.5 Hz, 1H)., 7.63 (d, *J* = 8.0 Hz, 2H), 7.35 (d, *J* = 8.0 Hz, 2H), 7.30 (dd, *J* = 7.5, 5.0 Hz, 1H), 2.45 (s, 3H).

**13C NMR** (125 MHz, CDCl3) δ 156.5, 150.5, 149.9, 147.5, 138.2, 137.7, 136.9, 134.9, 134.2, 133.4, 129.9, 129.7, 128.2, 127.9, 127.2, 126.3, 122.5, 120.9, 21.2.

**HRMS** (ESI) m/z calcd. for C21H17N2+ [M + H]+ 297.1386, found 297.1387.

-----------------------------------------------------------------------------------------------------------------------------------------------------------------------------------------------

**(97) 6-(Allyloxy)-3-(*p*-tolyl)quinoline**

Prepared according to **General Procedure F** *N*-triftosylhydrazone (102.6 mg, 0.3 mmol) derived from 4-methylbenzaldehyde and 5-(allyloxy)-1-(*tert*-butyldimethylsilyl)-1*H*-indole (172.2 mg, 0.6 mmol) afforded **97** (58.6 mg, 71% yield) as a white solid; mp: 75-77 °C.

**1H NMR** (500 MHz, CDCl3) δ 9.02 (d, *J* = 1.5 Hz, 1H), 8.15 (s, 1H), 8.03 (d, *J* = 9.0 Hz, 1H), 7.60 (d, *J* = 8.0 Hz, 2H), 7.39 (dd, *J* = 9.0, 2.5 Hz, 1H), 7.33 (d, *J* = 8.0 Hz, 2H), 7.13 (d, *J* = 2.5 Hz, 1H), 6.18-6.08 (m, 1H), 5.49 (d, *J* = 17.5 Hz, 1H), 5.35 (d, *J* = 10.5 Hz, 1H), 4.68 (d, *J* = 5.0 Hz, 2H), 2.43 (s, 3H).

**13C NMR** (150 MHz, CDCl3) δ 157.0, 147.5, 143.4, 138.0, 135.1, 134.1, 132.8, 131.7, 130.6, 129.8, 129.1, 127.2, 122.2, 118.0, 106.5, 69.1, 21.2.

**HRMS** (ESI) m/z calcd. for C19H18NO+ [M + H]+ 276.1383, found 276.1385.

-----------------------------------------------------------------------------------------------------------------------------------------------------------------------------------------------

**(98) 3-(*p*-Tolyl)quinolin-6-ol**

Prepared according to **General Procedure H** using *N*-triftosylhydrazone (102.6 mg, 0.3 mmol) derived from 4-methylbenzaldehyde and 1-(*tert*-butyldimethylsilyl)-5-((*tert*-butyldimethylsilyl)oxy)-1*H*-indole (216.6 mg, 0.6 mmol) afforded **98** (57.1 mg, 81% yield) as a white solide mp: 246-248 °C.

**1H NMR** (500 MHz, DMSO-*d*6) δ 10.07 (s, 1H), 8.98 (d, *J* = 2.0 Hz, 1H), 8.37 (d, *J* = 1.5 Hz, 1H), 7.89 (d, *J* = 9.0 Hz, 1H), 7.73 (d, *J* = 8.0 Hz, 2H), 7.37-7.28 (m, 3H), 7.23 (d, *J* = 2.5 Hz, 1H), 2.36 (s, 3H).

**13C NMR** (150 MHz, DMSO-*d*6) δ 156.0, 146.1, 142.2, 137.6, 134.6, 132.8, 130.7, 130.2, 129.9, 129.3, 127.0, 122.0, 108.7, 20.8.

**HRMS** (ESI) m/z calcd. for C16H14NO+ [M + H]+ 236.1070, found 236.1075.

-----------------------------------------------------------------------------------------------------------------------------------------------------------------------------------------------

**(99) *tert*-Butyl (3-(*p*-tolyl)quinolin-6-yl)carbamate**

Prepared according to **General Procedure F** using *N*-triftosylhydrazone (102.6 mg, 0.3 mmol) derived from 4-methylbenzaldehyde and *tert*-butyl (1-(*tert*-butyldimethylsilyl)-1*H*-indol-5-yl)carbamate (207.6 mg, 0.6 mmol) afforded **99** (53.1 mg, 53% yield) as a white solid; mp: 158-160 °C.

**1H NMR** (500 MHz, CDCl3) δ 9.04 (d, *J* = 2.0 Hz, 1H), 8.18 (d, *J* = 1.5 Hz, 1H), 8.15 (s, 1H), 8.02 (d, *J* = 9.0 Hz, 1H), 7.58 (d, *J* = 8.0 Hz, 2H), 7.45 (dd, *J* = 9.0, 2.5 Hz, 1H), 7.32 (d, *J* = 8.0 Hz, 2H), 6.88 (s, 1H), 2.43 (s, 3H), 1.56 (s, 9H).

**13C NMR** (150 MHz, CDCl3) δ 152.7, 148.5, 144.0, 138.0, 136.6, 135.0, 134.2, 132.3, 129.9, 128.8, 127.2, 122.2, 114.0, 81.1, 28.3, 21.2.

**HRMS** (ESI) m/z calcd. for C21H23N2O2+ [M + H]+ 335.1754, found 335.1754.

-----------------------------------------------------------------------------------------------------------------------------------------------------------------------------------------------

**(100) 2-Phenyl-3-(*p*-tolyl)quinoline**

Prepared according to **General Procedure F** *N*-triftosylhydrazone (102.6 mg, 0.3 mmol) derived from 4-methylbenzaldehyde and 1-(*tert*-butyldimethylsilyl)-2-phenyl-1*H*-indole (184.2 mg, 0.6 mmol) afforded **100** (47.8 mg, 54% yield) as a pale yellow oil.

**1H NMR** (500 MHz, CDCl3) δ 8.20 (d, *J* = 8.5 Hz, 1H), 8.16 (s, 1H), 7.86 (d, *J* = 8.0 Hz, 1H), 7.73 (t, *J* = 7.5 Hz, 1H), 7.56 (t, *J* = 7.5 Hz, 1H), 7.50-7.44 (m, 2H), 7.34-7.26 (m, 3H), 7.14 (d, *J* = 8.0 Hz, 2H), 7.11 (d, *J* = 8.0 Hz, 2H), 2.36 (s, 3H).

**13C NMR** (150 MHz, CDCl3) δ 158.5, 147.2, 140.6, 137.4, 137.0, 136.9, 134.5, 130.0, 129.6, 129.43, 129.40, 128.9, 127.9, 127.4, 127.3, 126.6, 21.1.

**HRMS** (ESI) m/z calcd. for C22H18N+ [M + H]+ 296.1434, found 296.1433.

-----------------------------------------------------------------------------------------------------------------------------------------------------------------------------------------------

**(101) 5-Chloro-3-(*p*-tolyl)quinoline**

Prepared according to **General Procedure F** using *N*-triftosylhydrazone (102.6 mg, 0.3 mmol) derived from 4-methylbenzaldehyde and 1-(*tert*-butyldimethylsilyl)-4-chloro-1*H*-indole (159.0 mg, 0.6 mmol) afforded **101** (63.0 mg, 83% yield) as a white solid; mp: 75-77 °C.

**1H NMR** (500 MHz, CDCl3) δ 9.20 (d, *J* = 2.0 Hz, 1H), 8.66 (d, *J* = 1.0 Hz, 1H), 8.05 (d, *J* = 8.0 Hz, 1H), 7.67-7.56 (m, 4H), 7.34 (d, *J* = 8.0 Hz, 2H), 2.44 (s, 3H).

**13C NMR** (150 MHz, CDCl3) δ 150.5, 147.7, 138.4, 134.6, 134.5, 131.4, 129.9, 129.4, 128.7, 128.4, 127.3, 126.9, 126.2, 21.2.

**HRMS** (ESI) m/z calcd. for C16H13ClN+ [M + H]+ 254.0731, found 254.0733.

-----------------------------------------------------------------------------------------------------------------------------------------------------------------------------------------------

**(102) 5-Methoxy-3-(*p*-tolyl)quinoline**

Prepared according to **General Procedure F** using *N*-triftosylhydrazone (102.6 mg, 0.3 mmol) derived from 4-methylbenzaldehyde and 1-(*tert*-butyldimethylsilyl)-4-methoxy-1*H*-indole (156.6 mg, 0.6 mmol) afforded **102** (70.2 mg, 94% yield) as a white solid; mp: 101-102 °C.

**1H NMR** (500 MHz, CDCl3) δ 9.17 (d, *J* = 2.0 Hz, 1H), 8.72 (d, *J* = 1.5 Hz, 1H), 7.72 (d, *J* = 8.5 Hz, 1H), 7.64 (d, *J* = 8.0 Hz, 2H), 7.60 (t, *J* = 8.0 Hz, 1H), 7.32 (d, *J* = 8.0 Hz, 2H), 6.88 (d, *J* = 8.0 Hz, 1H), 4.03 (s, 3H), 2.43 (s, 3H).

**13C NMR** (150 MHz, CDCl3) δ 155.3, 150.0, 147.9, 137.8, 135.2, 132.9, 129.8, 129.1, 127.7, 127.2, 121.3, 120.6, 104.5, 55.8, 21.1.

**HRMS** (ESI) m/z calcd. for C17H16NO+ [M + H]+ 250.1226, found 250.1222.

-----------------------------------------------------------------------------------------------------------------------------------------------------------------------------------------------

**(103) 3-(*p*-Tolyl)quinoline-7-carbonitrile**

Prepared according to **General Procedure F** using *N*-triftosylhydrazone (102.6 mg, 0.3 mmol) derived from 4-methylbenzaldehyde and 1-(*tert*-butyldimethylsilyl)-1*H*-indole-6-carbonitrile (153.6 mg, 0.6 mmol) afforded **103** (37.3 mg, 51% yield) as a white solid; mp: 155-158 °C.

**1H NMR** (500 MHz, CDCl3) δ9.28 (d, *J* = 2.0 Hz, 1H), 8.49 (s, 1H), 8.31 (d, *J* = 2.0 Hz, 1H), 7.96 (d, *J* = 8.5 Hz, 1H), 7.71 (dd, *J* = 8.5, 1.5 Hz, 1H), 7.65-7.60 (m, 2H), 7.39-7.33 (m, 2H), 2.45 (s, 3H).

**13C NMR** (150 MHz, CDCl3) δ 151.9, 145.9, 139.1, 136.3, 135.2, 133.9, 132.3, 130.2, 130.1, 129.3, 127.7, 127.3, 118.6, 112.4, 21.2.

**HRMS** (ESI) m/z calcd. for C17H13N2+ [M + H]+ 245.1073, found 245.1080.

-----------------------------------------------------------------------------------------------------------------------------------------------------------------------------------------------

**(104) 8-Fluoro-3-(*p*-tolyl)quinoline**

Prepared according to **General Procedure F** using *N*-triftosylhydrazone (102.6 mg, 0.3 mmol) derived from 4-methylbenzaldehyde and 1-(*tert*-butyldimethylsilyl)-7-fluoro-1*H*-indole (149.4 mg, 0.6 mmol) afforded **104** (69.7 mg, 98% yield) as a white solid; mp: 81-82 °C.

**1H NMR** (500 MHz, CDCl3) δ 9.19 (d, *J* = 2.0 Hz, 1H), 8.25-8.22 (m, 1H), 7.61 (d, *J* = 8.5 Hz, 1H), 7.57 (d, *J* = 8.0 Hz, 2H), 7.49-7.42 (m, 1H), 7.38-7.32 (m, 1H), 7.30 (d, *J* = 8.0 Hz, 2H), 2.41 (s, 3H).

**13C NMR** (150 MHz, CDCl3) δ 158.0 (d, *J* = 255.0 Hz), 150.0, 138.3, 137.2 (d, *J* = 12.0 Hz), 134.7, 134.3, 132.3 (d, *J* = 3.0 Hz), 129.9, 129.7 (d, *J* = 1.5 Hz), 127.1, 126.6 (d, *J* = 7.5 Hz), 123.4 (d, *J* = 4.5 Hz), 113.1 (d, *J* = 18.0 Hz), 21.1.

**19F NMR** (564 MHz, CDCl3) δ (-125.69)- (-125.82) (m).

**HRMS** (ESI) m/z calcd. for C16H13FN+ [M + H]+ 238.1027, found 238.1034.

-----------------------------------------------------------------------------------------------------------------------------------------------------------------------------------------------

**(105) 7-Bromo-6-fluoro-3-(*p*-tolyl)quinoline**

Prepared according to **General Procedure F** using *N*-triftosylhydrazone (102.6 mg, 0.3 mmol) derived from 4-methylbenzaldehyde and 6-bromo-1-(*tert*-butyldimethylsilyl)-5-fluoro-1*H*-indole (196.8 mg, 0.6 mmol) afforded **105** (88.2 mg, 93% yield) as a white solid; mp: 164-166 °C.

**1H NMR** (500 MHz, CDCl3) δ9.12 (d, *J* = 2.0 Hz, 1H), 8.37 (d, *J* = 6.5 Hz, 1H), 8.17 (d, *J* = 2.0 Hz, 1H), 7.60-7.56 (m, 2H), 7.52 (d, *J* = 8.5 Hz, 1H), 7.35-7.31 (m, 2H), 2.43 (s, 3H).

**13C NMR** (150 MHz, CDCl3) δ 156.8 (d, *J* = 247.5 Hz), 150.2 (d, *J* = 3.0 Hz), 144.4, 138.6, 134.7, 134.4, 134.2, 131.7 (d, *J* = 6.0 Hz), 130.0, 127.9 (d, *J* = 7.5 Hz), 127.2, 112.7 (d, *J* = 25.5 Hz), 111.6 (d, *J* = 22.5 Hz), 21.2.

**19F NMR** (564 MHz, CDCl3) δ-108.13 (t, *J* = 7.9 Hz).

**HRMS** (ESI) m/z calcd. for C16H12BrFN+ [M + H]+ 316.0132, found 316.0128.

-----------------------------------------------------------------------------------------------------------------------------------------------------------------------------------------------

**(106) 7-(*p*-Tolyl)-[1,3]dioxolo[4,5-*g*]quinoline**

Prepared according to **General Procedure F** using *N*-triftosylhydrazone (102.6 mg, 0.3 mmol) derived from 4-methylbenzaldehyde and 5-(*tert*-butyldimethylsilyl)-5*H*-[1,3]dioxolo[4,5-*f*]indole (165.0 mg, 0.6 mmol) afforded **106** (66.3 mg, 84% yield) as a white solid; mp: 166-168 °C.

**1H NMR** (500 MHz, CDCl3) δ 8.92 (d, *J* = 1.5 Hz, 1H), 8.02 (s, 1H), 7.53 (d, *J* = 7.5 Hz, 2H), 7.37 (s, 1H), 7.27 (d, *J* = 7.5 Hz, 2H), 7.02 (s, 1H), 6.05 (s, 2H), 2.40 (s, 3H).

**13C NMR** (150 MHz, CDCl3) δ 150.4, 148.0, 147.2, 145.3, 137.6, 135.0, 132.1, 131.8, 129.7, 126.9, 125.0, 105.5, 102.7, 101.6, 21.0.

**HRMS** (ESI) m/z calcd. for C17H14NO2+ [M + H]+ 264.1019, found 264.1021.

-----------------------------------------------------------------------------------------------------------------------------------------------------------------------------------------------

**(107) 2,4-Dimethyl-3-(*p*-tolyl)quinoline**

Prepared according to **General Procedure G** using *N*-triftosylhydrazone (102.6 mg, 0.3 mmol) derived from 4-methylbenzaldehyde and 1-(*tert*-butyldimethylsilyl)-2,3-dimethyl-1*H*-indole (155.4 mg, 0.6 mmol) afforded **107** (41.5 mg, 56% yield) as a white solid; mp: 66-68 °C.

**1H NMR** (500 MHz, CDCl3) δ 8.06 (d, *J* = 8.5 Hz, 1H), 8.00-7.97 (m, 1H), 7.71-7.66 (m, 1H), 7.55-7.49 (m, 1H), 7.29 (d, *J* = 8.0 Hz, 2H), 7.09 (d, *J* = 8.0 Hz, 2H), 2.45 (s, 3H), 2.44 (s, 3H), 2.39 (s, 3H).

**13C NMR** (150 MHz, CDCl3) δ 157.8, 146.5, 141.3, 137.0, 136.5, 134.9, 129.3, 129.2, 129.1, 128.7, 126.8, 125.6, 124.1, 25.4, 21.2, 15.9.

**HRMS** (ESI) m/z calcd. for C18H18N+ [M + H]+ 248.1434, found 248.1432.

-----------------------------------------------------------------------------------------------------------------------------------------------------------------------------------------------

**(108) 5-Fluoro-2-methyl-3-(*p*-tolyl)quinolin-6-ol**

Prepared according to **General Procedure L** using *N*-triftosylhydrazone (102.6 mg, 0.3 mmol) derived from 4-methylbenzaldehyde and 1-(*tert*-butyldimethylsilyl)-5-((*tert*-butyldimethylsilyl)oxy)-4-fluoro-2-methyl-1*H*-indole (235.8 mg, 0.6 mmol) afforded **108** (66.5 mg, 83% yield) as a pale yellow solid; mp: 221-222 °C.

**1H NMR** (500 MHz, CDCl3) δ 8.16 (s, 1H), 7.85 (d, *J* = 9.5 Hz, 1H), 7.72 (t, *J* = 9.0 Hz, 1H), 7.32-7.27 (m, 4H), 5.98 (s, 1H), 2.66 (s, 3H), 2.44 (s, 3H).

**13C NMR** (150 MHz, CDCl3) δ 157.4, 146.8 (d, *J* = 254.0 Hz), 143.6, 139.6 (d, *J* = 8.5 Hz), 137.7, 136.5, 136.3 (d, *J* = 1.5 Hz), 129.2, 129.0, 128.6 (d, *J* = 4.5 Hz), 124.7 (d, *J* = 4.5 Hz), 121.8, 118.4 (d, *J* = 12.0 Hz), 24.6, 21.2.

**19F NMR** (564 MHz, CDCl3) δ-143.23 (d, *J* = 8.46 Hz).

**HRMS** (ESI) m/z calcd. for C17H15FNO+ [M + H]+ 268.1132, found 268.1135.

-----------------------------------------------------------------------------------------------------------------------------------------------------------------------------------------------

**(109) 3-(*p*-Tolyl)-1,8-naphthyridine**

Prepared according to **General Procedure F** using *N*-triftosylhydrazone (102.6 mg, 0.3 mmol) derived from 4-methylbenzaldehyde and 1-(*tert*-butyldimethylsilyl)-1*H*-pyrrolo[2,3-*b*]pyridine (139.2 mg, 0.6 mmol) afforded **109** (60.1 mg, 91% yield) as a white solid; mp: 163-165 °C.

**1H NMR** (500 MHz, CDCl3) δ 9.35 (s, 1H), 9.07 (s, 1H), 8.24 (s, 1H), 8.19 (d, *J* = 7.5 Hz, 1H), 7.57 (d, *J* = 7.5 Hz, 2H), 7.50-7.43 (m, 1H), 7.30 (d, *J* = 7.5 Hz, 2H), 2.40 (s, 3H).

**13C NMR** (150 MHz, CDCl3) δ 155.3, 153.02, 152.96, 138.4, 137.1, 134.7, 133.9, 133.3, 129.9, 127.1, 122.5, 122.3, 21.1.

**HRMS** (ESI) m/z calcd. for C15H13N2+ [M + H]+ 221.1073, found 221.1076.

-----------------------------------------------------------------------------------------------------------------------------------------------------------------------------------------------

**(110) 3-Chloro-6-(*p*-tolyl)-1,8-naphthyridine**

Prepared according to **General Procedure F** using *N*-triftosylhydrazone (102.6 mg, 0.3 mmol) derived from 4-methylbenzaldehyde and 1-(*tert*-butyldimethylsilyl)-5-chloro-1*H*-pyrrolo[2,3-*b*]pyridine (159.6 mg, 0.6 mmol) afforded **110** (67.8 mg, 89% yield) as a white solid; mp: 238-239 °C.

**1H NMR** (500 MHz, CDCl3) δ 9.37 (d, *J* = 2.5 Hz, 1H), 9.01 (d, *J* = 2.5 Hz, 1H), 8.24 (d, *J* = 2.5 Hz, 1H), 8.23 (d, *J* = 2.5 Hz, 1H), 7.61 (d, *J* = 8.0 Hz, 2H), 7.36 (d, *J* = 8.0 Hz, 2H), 2.45 (s, 3H).

**13C NMR** (125 MHz, CDCl3) δ 153.4, 153.3, 152.4, 139.0, 135.9, 134.9, 133.5, 132.5, 130.1, 129.9, 127.3, 122.9, 21.2.

**HRMS** (ESI) m/z calcd. for C15H12ClN2+ [M + H]+ 255.0684, found 255.0680.

-----------------------------------------------------------------------------------------------------------------------------------------------------------------------------------------------

**(111) 2-(3-(*p*-Tolyl)quinolin-4-yl)ethan-1-ol**

Prepared according to **General Procedure F** using *N*-triftosylhydrazone (102.6 mg, 0.3 mmol) derived from 4-methylbenzaldehyde and 1-(*tert*-butyldimethylsilyl)-3-(2-((*tert*-butyldimethylsilyl)oxy)ethyl)-1*H*-indole (233.4 mg, 0.6 mmol) afforded **111** (56.8 mg, 72% yield) as a white solid; mp: 108-110 °C.

**1H NMR** (500 MHz, CDCl3) δ 8.71 (s, 1H), 8.15 (d, *J* = 8.5 Hz, 1H), 8.09 (d, *J* = 8.5 Hz, 1H), 7.69 (t, *J* = 7.5 Hz, 1H), 7.59 (t, *J* = 7.5 Hz, 1H), 7.31-7.26 (m, 4H), 3.87 (t, *J* = 7.5 Hz, 2H), 3.38 (t, *J* = 7.5 Hz, 2H), 2.43 (s, 3H), 1.99 (s, 1H).

**13C NMR** (125 MHz, CDCl3) δ 151.7, 147.3, 141.0, 137.6, 135.43, 135.41, 130.1, 129.6, 129.3, 128.9, 127.3, 126.9, 124.1, 62.7, 32.1, 21.2.

**HRMS** (ESI) m/z calcd. for C18H18NO+ [M + H]+ 264.1383, found 264.1385.

-----------------------------------------------------------------------------------------------------------------------------------------------------------------------------------------------

**(112) *N*-(2-(6-Methoxy-3-(*p*-tolyl)quinolin-4-yl)ethyl)acetamide**

Prepared according to **General Procedure F** using *N*-triftosylhydrazone (102.6 mg, 0.3 mmol) derived from 4-methylbenzaldehyde and *tert*-butyl (2-(1-(*tert*-butyldimethylsilyl)-5-methoxy-1*H*-indol-3-yl)ethyl)carbamate (242.4 mg, 0.6 mmol) afforded **112** (32.9 mg, 28% yield) as a white solid; mp: 186-188 °C.

**1H NMR** (500 MHz, CDCl3) δ 8.58 (s, 1H), 8.01 (d, *J* = 9.0 Hz, 1H), 7.75 (d, *J* = 2.5 Hz, 1H), 7.37 (dd, *J* = 9.0, 2.5 Hz, 1H), 7.30 (d, *J* = 8.0 Hz, 2H), 7.24 (d, *J* = 8.0 Hz, 2H), 5.62 (s, 1H), 4.06 (s, 3H), 3.45-3.38 (m, 2H), 3.29-3.22 (m, 2H), 2.44 (s, 3H), 1.90 (s, 3H).

**13C NMR** (125 MHz, CDCl3) δ 170.3, 158.5, 148.9, 143.4, 139.8, 137.6, 135.7, 135.1, 131.3, 129.4, 129.3, 128.4, 121.9, 102.4, 56.0, 39.8, 29.1, 23.2, 21.2.

**HRMS** (ESI) m/z calcd. for C24H29N2O3+ [M + H]+ 393.2173, found 393.2175.

-----------------------------------------------------------------------------------------------------------------------------------------------------------------------------------------------

**(113) Methyl 5-(3-(*p*-tolyl)quinolin-6-yl)furan-3-carboxylate**

Prepared according to **General Procedure F** using *N*-triftosylhydrazone (102.6 mg, 0.3 mmol) derived from 4-methylbenzaldehyde and methyl 5-(1-(*tert*-butyldimethylsilyl)-1*H*-indol-5-yl)furan-3-carboxylate (213.0 mg, 0.6 mmol) afforded **113** (38.1 mg, 37% yield) as a white solid; mp: 188-189 °C.

**1H NMR** (500 MHz, CDCl3) δ 9.15 (d, *J* = 2.0 Hz, 1H), 8.28 (d, *J* = 1.5 Hz, 1H), 8.16 (d, *J* = 1.5 Hz, 1H), 8.14 (d, *J* = 9.0 Hz, 1H), 8.11 (s, 1H), 7.97 (dd, *J* = 8.5, 2.0 Hz, 1H), 7.62 (d, *J* = 8.0 Hz, 2H), 7.35 (d, *J* = 8.0 Hz, 2H), 7.14 (s, 1H), 3.89 (s, 3H), 2.45 (s, 3H).

**13C NMR** (125 MHz, CDCl3) δ 163.4, 154.5, 150.2, 147.4, 146.8, 138.3, 134.7, 134.6, 132.9, 130.0, 129.9, 128.21, 128.15, 127.2, 125.5, 122.5, 121.2, 105.8, 51.8, 21.2.

**HRMS** (ESI) m/z calcd. for C22H18NO3+ [M + H]+ 344.1281, found 344.1284.

-----------------------------------------------------------------------------------------------------------------------------------------------------------------------------------------------

**(114) 3-Methyl-1-(3-(*p*-tolyl)quinolin-6-yl)butan-1-one**

Prepared according to **General Procedure F** using *N*-triftosylhydrazone (102.6 mg, 0.3 mmol) derived from 4-methylbenzaldehyde and 1-(1-(*tert*-butyldimethylsilyl)-1*H*-indol-5-yl)-3-methylbutan-1-one (189.0 mg, 0.6 mmol) afforded **114** (41.8 mg, 46% yield) as a white solid; mp: 94-96 °C.

**1H NMR** (500 MHz, CDCl3) δ9.25 (d, *J* = 2.0 Hz, 1H), 8.49 (d, *J* = 1.5 Hz, 1H), 8.39 (d, *J* = 2.0 Hz, 1H), 8.25 (dd, *J* = 9.0, 2.0 Hz, 1H), 8.17 (d, *J* = 9.0 Hz, 1H), 7.63 (d, *J* = 8.0 Hz, 2H), 7.36 (d, *J* = 8.0 Hz, 2H), 2.99 (d, *J* = 7.0 Hz, 2H), 2.45 (s, 3H), 2.43-2.33 (m, 1H), 1.05 (d, *J* = 7.0 Hz, 6H).

**13C NMR** (150 MHz, CDCl3) δ δ 199.6, 152.1, 148.9, 138.5, 135.5, 134.7, 134.4, 134.0, 130.0, 129.8, 129.5, 127.5, 127.4, 127.2, 47.7, 25.3, 22.8, 21.2.

**HRMS** (ESI) m/z calcd. for C21H22NO+ [M + H]+ 304.1696, found 304.1701.

-----------------------------------------------------------------------------------------------------------------------------------------------------------------------------------------------

**(115) 5-(Oxiran-2-ylmethoxy)-3-(*p*-tolyl)quinoline**

Prepared according to **General Procedure H** using *N*-triftosylhydrazone (102.6 mg, 0.3 mmol) derived from 4-methylbenzaldehyde and 1-(*tert*-butyldimethylsilyl)-4-(oxiran-2-ylmethoxy)-1*H*-indole (181.1 mg, 0.6 mmol) afforded **115** (35.8 mg, 41% yield) as a white solid; mp: 96-98 °C.

**1H NMR** (500 MHz, CDCl3) δ 9.17 (d, *J* = 2.0 Hz, 1H), 8.74 (d, *J* = 1.5 Hz, 1H), 7.74 (d, *J* = 8.5 Hz, 1H), 7.64 (d, *J* = 8.0 Hz, 2H), 7.59 (t, *J* = 8.0 Hz, 1H), 7.34 (d, *J* = 8.0 Hz, 2H), 6.89 (d, *J* = 7.5 Hz, 1H), 4.47 (dd, *J* = 11.0, 3.0 Hz, 1H), 4.14 (dd, *J* = 11.0, 6.0 Hz, 1H), 3.55-3.49 (m, 1H), 2.99 (t, *J* = 4.5 Hz, 1H), 2.87-2.83 (m, 1H), 2.44 (s, 3H).

**13C NMR** (150 MHz, CDCl3) δ 154.1, 150.2, 148.0, 137.9, 135.2, 133.1, 129.8, 128.9, 127.6, 127.3, 122.0, 120.6, 105.7, 69.5, 50.1, 44.7, 21.2.

**HRMS** (ESI) m/z calcd. for C19H18NO2+ [M + H]+ 292.1332, found 292.1331.

-----------------------------------------------------------------------------------------------------------------------------------------------------------------------------------------------

**(116) 17-acetyl-10,13-dimethyl-2,3,4,7,8,9,10,11,12,13,14,15,16,17-tetradecahydro-1*H*-cyclopenta[*a*]phenanthren-3-yl 3-(*p*-tolyl)quinoline-7-carboxylate**

Prepared according to **General Procedure F** using *N*-triftosylhydrazone (102.6 mg, 0.3 mmol) derived from 4-methylbenzaldehyde and corresponding *N*-TBS indole (343.8 mg, 0.6 mmol) afforded **116** (70.7 mg, 42% yield) as a white solid; mp: >300 °C.

**1H NMR** (500 MHz, CDCl3) δ 9.25 (d, *J* = 2.0 Hz, 1H), 8.85 (s, 1H), 8.30 (s, 1H), 8.16 (d, *J* = 8.0 Hz, 1H), 7.91 (d, *J* = 8.5 Hz, 1H), 7.64 (d, *J* = 8.0 Hz, 2H), 7.35 (d, *J* = 8.0 Hz, 2H), 5.45 (d, *J* = 4.0 Hz, 1H), 4.99 -4.87 (m, 1H), 2.58-2.50 (m, 3H), 2.44 (s, 3H), 2.23-2.15 (m, 1H), 2.13 (s, 3H), 2.09-2.04 (m, 2H), 1.99-1.91 (m, 1H), 1.86-1.75 (m, 1H), 1.75-1.57 (m, 5H), 1.57-1.42 (m, 3H), 1.33-1.14 (m, 4H), 1.09 (s, 3H), 0.65 (s, 3H).

**13C NMR** (150 MHz, CDCl3) δ 209.6, 165.7, 150.9, 146.4, 139.6, 138.6, 135.4, 134.4, 132.3, 131.8, 131.2, 130.5, 130.0, 128.1, 127.3, 126.5, 122.5, 74.9, 63.7, 56.9, 49.9, 44.0, 38.8, 38.2, 37.0, 36.7, 31.82, 31.79, 31.5, 27.9, 24.5, 22.8, 21.2, 21.1, 19.4, 13.2.

**HRMS** (ESI) m/z calcd. for C38H44NO3+ [M + H]+ 562.3316, found 562.3314.

-----------------------------------------------------------------------------------------------------------------------------------------------------------------------------------------------

**(117) (4-(Prop-1-en-2-yl)cyclohex-1-en-1-yl)methyl 3-(*p*-tolyl)quinoline-7-carboxylate**

Prepared according to **General Procedure F** using *N*-triftosylhydrazone (102.6 mg, 0.3 mmol) derived from 4-methylbenzaldehyde and corresponding *N*-TBS indole (245.4 mg, 0.6 mmol) afforded **117** (104.8 mg, 88% yield) as a pale yellow oil.

**1H NMR** (500 MHz, CDCl3) δ 9.25 (d, *J* = 2.0 Hz, 1H), 8.86 (s, 1H), 8.30 (d, *J* = 1.5 Hz, 1H), 8.18 (dd, *J* = 8.5, 1.0 Hz, 1H), 7.91 (d, *J* = 8.5 Hz, 1H), 7.63 (d, *J* = 8.0 Hz, 2H), 7.35 (d, *J* = 8.0 Hz, 2H), 5.93-5.88 (m, 1H), 4.83-4.77 (m, 2H), 4.77-4.72 (m, 2H), 2.44 (s, 3H), 2.28-2.16 (m, 4H), 2.08-1.98 (m, 1H), 1.95-1.84 (m, 1H), 1.76 (s, 3H), 1.62-1.48 (m, 1H).

**13C NMR** (125 MHz, CDCl3) δ 166.1, 150.9, 149.6, 146.4, 138.6, 135.4, 134.4, 132.5, 132.3, 131.8, 130.8, 130.6, 130.0, 128.1, 127.3, 126.5, 126.0, 108.8, 69.3, 40.8, 30.5, 27.4, 26.5, 21.2, 20.8.

**HRMS** (ESI) m/z calcd. for C27H28NO2+ [M + H]+ 398.2115, found 398.2117.

-----------------------------------------------------------------------------------------------------------------------------------------------------------------------------------------------

**(118) 3,7-Dimethylocta-2,6-dien-1-yl 3-(*p*-tolyl)quinoline-7-carboxylate**

Prepared according to **General Procedure F** using *N*-triftosylhydrazone (102.6 mg, 0.3 mmol) derived from 4-methylbenzaldehyde and corresponding *N*-TBS indole (246.6 mg, 0.6 mmol) afforded **118** (93.4 mg, 78% yield) as a pale yellow oil.

**1H NMR** (500 MHz, CDCl3) δ 9.25 (s, 1H), 8.86 (s, 1H), 8.30 (s, 1H), 8.18 (d, *J* = 8.5 Hz, 1H), 7.91 (d, *J* = 8.5 Hz, 1H), 7.64 (d, *J* = 8.0 Hz, 2H), 7.35 (d, *J* = 8.0 Hz, 2H), 5.53 (t, *J* = 7.0 Hz, 1H), 5.11 (t, *J* = 6.5 Hz, 1H), 4.93 (d, *J* = 7.0 Hz, 2H), 2.45 (s, 3H), 2.19-2.07 (m, 4H), 1.80 (s, 3H), 1.68 (s, 3H), 1.62 (s, 3H).

**13C NMR** (125 MHz, CDCl3) δ 166.3, 150.9, 146.5, 142.8, 138.6, 135.4, 134.4, 132.3, 131.9, 131.8, 131.0, 130.5, 130.0, 128.1, 127.3, 126.5, 123.7, 118.2, 62.3, 58.5, 39.6, 26.3, 25.7, 21.2, 16.6.

**HRMS** (ESI) m/z calcd. for C27H30NO2+ [M + H]+ 400.2271, found 400.2270.

-----------------------------------------------------------------------------------------------------------------------------------------------------------------------------------------------

**(119) 3-Phenylpyridine**

Prepared according to **General Procedure M** using *N*-triftosylhydrazone (98.4 mg, 0.3 mmol) derived from benzaldehyde and pyrrole (40.2 mg, 0.6 mmol) afforded **119** (22.3 mg, 48% yield) as a coloress oil.

**1H NMR** (500 MHz, CDCl3) δ 8.86 (s, 1H), 8.59 (d, *J* = 4.0 Hz, 1H), 7.91-7.83 (m, 1H), 7.61-7.55 (m, 2H), 7.52-7.44 (m, 2H), 7.43-7.38 (m, 1H), 7.36 (dd, *J* = 8.0, 5.0 Hz, 1H).

**13C NMR** (125 MHz, CDCl3) δ 148.4, 148.3, 137.8, 136.6, 134.3, 129.0, 128.0, 127.1, 123.5.

**HRMS** (ESI) m/z calcd. for C11H10N+ [M + H]+ 156.0808, found 156.0810.

-----------------------------------------------------------------------------------------------------------------------------------------------------------------------------------------------

**(120) 3-(4-(Trifluoromethyl)phenyl)pyridine**

Prepared according to **General Procedure M** using *N*-triftosylhydrazone (118.8 mg, 0.3 mmol) derived from 4-(trifluoromethyl)benzaldehyde and pyrrole (40.2 mg, 0.6 mmol) afforded **120** (54.2 mg, 81% yield) as a white solid; mp: 57-58 °C.

**1H NMR** (500 MHz, CDCl3) δ 8.86 (s, 1H), 8.68-8.62 (m, 1H), 7.91-7.86 (m, 1H), 7.74 (d, *J* = 8.0 Hz, 2H), 7.69 (d, *J* = 8.0 Hz, 2H), 7.40 (dd, *J* = 7.5, 5.0 Hz, 1H).

**13C NMR** (150 MHz, CDCl3) δ 149.4, 148.3, 141.4, 135.2, 134.5, 130.2 (q, *J* = 31.5 Hz), 127.5, 126.0 (q, *J* = 4.5 Hz), 124.0 (q, *J* = 270.0 Hz), 123.7.

**19F NMR** (564 MHz, CDCl3) δ -62.55.

**HRMS** (ESI) m/z calcd. for C12H9F3N+ [M + H]+ 224.0682, found 224.0684.

-----------------------------------------------------------------------------------------------------------------------------------------------------------------------------------------------

**(121) 3-(3-Fluorophenyl)pyridine**

Prepared according to **General Procedure M** using *N*-triftosylhydrazone (103.8 mg, 0.3 mmol) derived from 4-fluorobenzaldehyde and pyrrole (40.2 mg, 0.6 mmol) afforded **121** (32.7 mg, 63% yield) as a white oil.

**1H NMR** (600 MHz, CDCl3) δ 8.83 (d, *J* = 1.8 Hz, 1H), 8.64-8.58 (m, 1H), 7.88-7.82 (m, 1H), 7.47-7.41 (m, 1H), 7.40-7.33 (m, 2H), 7.30-7.25 (m, 1H), 7.10 (td, *J* = 8.4, 1.8 Hz, 1H).

**13C NMR** (150 MHz, CDCl3) δ 163.2 (d, *J* = 246.0 Hz), 149.0, 148.2, 140.0 (d, *J* = 7.5 Hz), 135.4 (d, *J* = 1.5 Hz), 134.3, 130.6 (d, *J* = 9.0 Hz), 123.6, 122.8 (d, *J* = 3.0 Hz), 114.9 (d, *J* = 21.0 Hz), 114.1 (d, *J* = 22.0 Hz).

**19F NMR** (564 MHz, CDCl3) δ (-112.19)-(112.29) (m).

**HRMS** (ESI) m/z calcd. for C11H9FN+ [M + H]+ 174.0714, found 174.0715.

-----------------------------------------------------------------------------------------------------------------------------------------------------------------------------------------------

**(122) Methyl 4-(pyridin-3-yl)benzoate**

Prepared according to **General Procedure M** using *N*-triftosylhydrazone (115.8 mg, 0.3 mmol) derived from methyl 4-formylbenzoate and pyrrole (40.2 mg, 0.6 mmol) afforded **122** (36.4 mg, 57% yield) as a white solid; mp: 100-103 °C.

**1H NMR** (500 MHz, CDCl3) δ 8.87 (d, *J* = 1.5 Hz, 1H), 8.66-8.60 (m, 1H), 8.14 (d, *J* = 8.5 Hz, 2H), 7.92-7.87 (m, 1H), 7.65 (d, *J* = 8.5 Hz, 2H), 7.41-7.36 (m, 1H), 3.94 (s, 3H).

**13C NMR** (150 MHz, CDCl3) δ 166.7, 149.2, 148.3, 142.2, 135.5, 134.4, 130.3, 129.7, 127.0, 123.6, 52.2.

**HRMS** (ESI) m/z calcd. for C13H12NO2+ [M + H]+ 214.0863, found 214.0862.

-----------------------------------------------------------------------------------------------------------------------------------------------------------------------------------------------

**(123) 3-(*p*-Tolyl)pyridine**

Prepared according to **General Procedure M** using *N*-triftosylhydrazone (102.6 mg, 0.3 mmol) derived from 4-methylbenzaldehyde and and pyrrole (40.2 mg, 0.6 mmol) afforded **123** (20.3 mg, 40% yield) as a white solid; mp: 45-46 °C.

**1H NMR** (500 MHz, CDCl3) δ 8.84 (d, *J* = 1.5 Hz, 1H), 8.60-8.54 (m, 1H), 7.87-7.81 (m, 1H), 7.48 (d, *J* = 8.0 Hz, 2H), 7.33 (dd, *J* = 8.0, 5.0 Hz, 1H), 7.28 (d, *J* = 8.0 Hz, 2H), 2.40 (s, 3H).

**13C NMR** (125 MHz, CDCl3) δ148.14, 148.12, 137.9, 136.5, 134.9, 134.0, 129.7, 126.9, 123.4, 21.1.

**HRMS** (ESI) m/z calcd. for C12H12N+ [M + H]+ 170.0964, found 170.0961.

-----------------------------------------------------------------------------------------------------------------------------------------------------------------------------------------------

**(124) 3-(3,4-Dichlorophenyl)pyridine**

Prepared according to **General Procedure M** using *N*-triftosylhydrazone (119.1 mg, 0.3 mmol) derived from 3,4-dichlorobenzaldehyde and pyrrole (40.2 mg, 0.6 mmol) afforded **124** (41.7 mg, 62% yield) as a white solid; mp: 86-88 °C.

**1H NMR** (600 MHz, CDCl3) δ8.80 (d, *J* = 1.8 Hz, 1H), 8.66-8.60 (m, 1H), 7.83 (dt, *J* = 8.4, 1.8 Hz, 1H), 7.66 (d, *J* = 1.8 Hz, 1H), 7.55 (d, *J* = 8.4 Hz, 1H), 7.41 (dd, *J* = 8.4, 2.4 Hz, 1H), 7.38 (dd, *J* = 7.8, 4.8 Hz, 1H).

**13C NMR** (125 MHz, CDCl3) δ 149.3, 148.0, 137.8, 134.4, 134.2, 133.3, 132.5, 131.0, 129.0, 126.3, 123.7

**HRMS** (ESI) m/z calcd. for C11H8Cl2N+ [M + H]+ 224.0028, found 224.0033.

-----------------------------------------------------------------------------------------------------------------------------------------------------------------------------------------------

**(125) 3-(3,5-Bis(trifluoromethyl)phenyl)pyridine**

Prepared according to **General Procedure M** using *N*-triftosylhydrazone (139.2 mg, 0.3 mmol) derived from 3,5-bis(trifluoromethyl)benzaldehyde and pyrrole (40.2 mg, 0.6 mmol) afforded **125** (57.6 mg, 66% yield) as a white solid; mp: 53-55 °C.

**1H NMR** (500 MHz, CDCl3) δ 8.87 (s, 1H), 8.70 (d, *J* = 4.5Hz, 1H), 8.01 (s, 2H), 7.94-7.89 (m, 2H), 7.44 (dd, *J* = 8.0, 5.0 Hz, 1H).

**13C NMR** (150 MHz, CDCl3) δ 150.1, 148.2, 140.1, 134.5, 133.9, 132.5 (q, *J* = 33.0 Hz), 127.3 (q, *J* = 3.0 Hz), 123.8, 123.0 (q, *J* = 271.5 Hz), 121.9-121.6 (m).

**19F NMR** (564 MHz, CDCl3) δ -62.94.

**HRMS** (ESI) m/z calcd. for C13H8F6N+ [M + H]+ 292.0555, found 292.0554.

-----------------------------------------------------------------------------------------------------------------------------------------------------------------------------------------------

**(126) 2,2,2-Trichloro-1-(5-(4-(trifluoromethyl)phenyl)pyridin-2-yl)ethan-1-one**

Prepared according to **General Procedure M** using *N*-triftosylhydrazone (118.8 mg, 0.3 mmol) derived from 4-(trifluoromethyl)benzaldehyde and 2,2,2-trichloro-1-(1*H*-pyrrol-2-yl)ethan-1-one (127.2 mg, 0.9 mmol) afforded **126** (58.9 mg, 59% yield) as a white solid; mp: 97-98 °C.

**1H NMR** (500 MHz, CDCl3) δ 8.95 (d, *J* = 1.5 Hz, 1H), 8.29 (d, *J* = 8.0 Hz, 1H), 8.12 (dd, *J* = 8.0, 2.0 Hz, 1H), 7.80 (d, *J* = 8.5 Hz, 2H), 7.76 (d, *J* = 8.5 Hz, 2H), 7.65 (s, 1H).

**13C NMR** (150 MHz, CDCl3) δ 186.3, 148.7, 147.8, 139.9, 139.8, 135.9, 131.3 (q, *J* = 33.0 Hz), 127.8, 126.3 (q, *J* = 3.0 Hz), 124.5, 123.8 (q, *J* = 270.0 Hz), 66.1.

**19F NMR** (564 MHz, CDCl3) δ -62.72.

**HRMS** (ESI) m/z calcd. for C14H9Cl2F3NO+ [M + H]+ 334.0008, found 334.0003.

-----------------------------------------------------------------------------------------------------------------------------------------------------------------------------------------------

**(127) 3-Methyl-5-(4-(trifluoromethyl)phenyl)pyridine**

Prepared according to **General Procedure M** using *N*-triftosylhydrazone (118.8 mg, 0.3 mmol) derived from 4-(trifluoromethyl)benzaldehyde and 3-methyl-1*H*-pyrrole (48.6 mg, 0.6 mmol) afforded **127** (22.7 mg, 32% yield) as a white solid; mp: 55-56 °C.

**1H NMR** (500 MHz, CDCl3) δ 8.66 (d, *J* = 1.5 Hz, 1H), 8.48 (s, 1H), 7.73 (d, *J* = 8.5 Hz, 2H), 7.70-7.66 (m, 3H), 2.42 (s, 3H).

**13C NMR** (150 MHz, CDCl3) δ 149.9, 145.5, 141.5, 135.1, 134.8, 133.3, 130.1 (q, *J* = 33.0 Hz), 127.5, 125.9 (q, *J* = 3.0 Hz), 124.1 (q, *J* = 270.0 Hz), 18.4.

**19F NMR** (564 MHz, CDCl3) δ -62.54.

**HRMS** (ESI) m/z calcd. for C13H11F3N+ [M + H]+ 238.0838, found 238.0844.

-----------------------------------------------------------------------------------------------------------------------------------------------------------------------------------------------

**(128) 4-Methyl-3-(4-(trifluoromethyl)phenyl)pyridine**

Prepared according to **General Procedure M** using *N*-triftosylhydrazone (118.8 mg, 0.3 mmol) derived from 4-(trifluoromethyl)benzaldehyde and 3-methyl-1*H*-pyrrole (48.6 mg, 0.6 mmol) afforded **128** (17.1 mg, 24% yield) as a white solid; mp: 58-60 °C.

**1H NMR** (500 MHz, CDCl3) δ8.49 (d, *J* = 5.0 Hz, 1H), 8.43 (s, 1H), 7.72 (d, *J* = 8.0 Hz, 1H), 7.45 (d, *J* = 8.0 Hz, 1H), 7.22 (d, *J* = 5.0 Hz, 1H), 2.29 (s, 3H).

**13C NMR** (150 MHz, CDCl3) δ 149.7, 149.0, 144.4, 141.6, 136.4, 129.9 (q, *J* = 31.5 Hz), 129.7, 125.4 (q, *J* = 3.0 Hz), 125.3, 124.1 (q, *J* = 270.0 Hz), 19.7.

**19F NMR** (564 MHz, CDCl3) δ -62.54.

**HRMS** (ESI) m/z calcd. for C13H11F3N+ [M + H]+ 238.0838, found 238.0842.

-----------------------------------------------------------------------------------------------------------------------------------------------------------------------------------------------

**7. References**

1. Zhang, X. *et al*. Use of trifluoroacetaldehyde *N*-tfsylhydrazone as a trifluorodiazoethane surrogate and its synthetic applications. *Nat. Commun.* **10**, 284 (2019).
2. Ning, Y. *et al*. Difluoroacetaldehyde *N*-triftosylhydrazone (DFHZ-Tfs) as a bench-stable crystalline diazo surrogate for diazoacetaldehyde and difluorodiazoethane. *Angew. Chem. Int. Ed.* **59**, 6473–6481 (2020).
3. Liu, Z. *et al*. Site-selective C–H benzylation of alkanes with *N*-triftosylhydrazones leading to alkyl aromatics. *Chem* **6**,2110–2114 (2020).
4. Ning, Y. *et al*. Ag-catalyzed insertion of alkynyl carbenes into C–C bonds of *β*-ketocarbonyls: a formal C(sp2) insertion. *Org. Lett.* **24**, 631–636 (2022).
5. Hu, Y. *et al.* Antitumor and topoisomerase Ⅱα inhibitory activities of 3-aryl-7-hydroxyquinolines. *Chin. J. Org. Chem.* **39**, 3230–3236 (2019).
6. Smith, J. A., Jones, R. K., Booker G. W. & Pyke S. M. Sequential and selective Buchwald-Hartwig amination reactions for the controlled functionalization of 6-bromo-2-chloroquinoline: synthesis of ligands for the Tec Src Homology 3 Domain. *J. Org. Chem.* **73**, 8880–8892 (2008).
7. Thandra, D. R. & Allikayala, R. Synthesis, characterization, molecular structure determination by single crystal X-ray diffraction, and Hirshfeld surface analysis of 7-fluoro-6-morpholino-3-phenylquinolin-1-ium chloride salt and computational studies of its cation. *J. Mol. Struct.* **1250**, 131701 (2022).
8. Jo, W., Kim, J., Choi, S. & Cho, S. H. Transition-metal-free regioselective alkylation of pyridine *N*-Oxides using 1,1-diborylalkanes as alkylating reagents. *Angew. Chem. Int. Ed.* **55**, 9690–9694 (2016).
9. Wang, M. *et al*. Story of an age-old reagent: an electrophilic chlorination of arenes and heterocycles by 1-chloro-1,2-benziodoxol-3-one. *Org. Lett*. **18**, 1976–1979 (2016).
10. Yadav, S., Kant, R. & Kuram, M. R. Metal-free transfer hydrogenation/cycloaddition cascade of activated quinolines and isoquinolines with tosyl azides. *Chem. Commun.* **59**, 7088–7091 (2023).
11. Felicetti, T. *et al*. Modifications on C6 and C7 positions of 3-phenylquinolone efflux pump inhibitors led to potent and safe antimycobacterial treatment adjuvants. *ACS Infect. Dis*. **5**, 982–1000 (2019).
12. Yang, C.-Y. *et al*. Discovery of 2-substituted 3-arylquinoline derivatives as potential anti-inflammatory agents through inhibition of LPS-induced inflammatory responses in macrophages. *Molecules* **24**, 1162 (2019).
13. Tsen*g*, C.-H. *et al.* Synthesis and antiproliferative evaluation of 3-phenylquinolinylchalcone derivatives against non-small cell lung cancers and breast cancers. *Eur. J. Med. Chem.* **59**, 274–282 (2013).
14. Tseng, C.-H. *et al*. Synthesis, antiproliferative and anti-dengue virus evaluations of 2-aroyl-3-arylquinoline derivatives. *Eur. J. Med.Chem*. **79**, 66–76 (2014).
15. Jung, K.-Y. *et al*. Structural modifications of (*Z*)-3-(2-aminoethyl)-5-(4-ethoxybenzylidene) thiazolidine-2,4-dione that improve selectivity for inhibiting the proliferation of melanoma cells containing active ERK signaling. *Org. Biomol. Chem.*11, 3706–3732 (2013).
16. Li, G. *et al*. Zinc(II)-catalyzed intramolecular hydroarylation-redox cross-dehydrogenative coupling of N-propargylanilines with diverse carbon pronucleophiles: facile access to functionalized tetrahydroquinolines. *Chem. Commun.***56**, 7333–7336 (2020).
17. Li, X. *et al*. One-pot synthesis of deuterated aldehydes from arylmethyl halides. *Org. Lett.* **20**, 1712–1715 (2018).
18. Gaussian 16 Revision C.01, Frisch, M. J., Trucks, G. W., Schlegel, H. B., Scuseria, G. E., Robb, M. A., Cheeseman, J. R., Scalmani, G., Barone, V., Petersson, G. A., Nakatsuji, H., Li, X., Caricato, M., Marenich, A. V., Bloino, J., Janesko, B. G., Gomperts, R., Mennucci, B., Hratchian, H. P., Ortiz, J. V., Izmaylov, A. F., Sonnenberg, J. L., Williams-Young, D., Ding, F., Lipparini, F., Egidi, F., Goings, J., Peng, B., Petrone, A., Henderson, T., Ranasinghe, D., Zakrzewski, V. G., Gao, J., Rega, N., Zheng, G., Liang, W., Hada, M., Ehara, M., Toyota, K., Fukuda, R., Hasegawa, J., Ishida, M., Nakajima, T., Honda, Y., Kitao, O., Nakai, H., Vreven, T., Throssell, K., Montgomery, J. A., Peralta, Jr. J. E., Ogliaro, F., Bearpark, M. J., Heyd, J. J., Brothers, E. N., Kudin, K. N., Staroverov, V. N., Keith, T. A., Kobayashi, R., Normand, J., Raghavachari, K., Rendell, A. P., Burant, J. C., Iyengar, S. S., Tomasi, J., Cossi, M., Millam, J. M., Klene, M., Adamo, C., Cammi, R., Ochterski, J. W., Martin, R. L., Morokuma, K., Farkas, O., Foresman, J. B. & Fox, D. J. Gaussian, Inc., Wallingford CT, 2019.
19. Zhao, Y. & Truhlar, D. G. The M06 suite of density functionals for main group thermochemistry, thermochemical kinetics, noncovalent interactions, excited states, and transition elements: two new functionals and systematic testing of four M06-class functionals and 12 other functionals. *Theor Chem Account* **120**, 215–241 (2008).
20. Tomasi, J., Mennucci, B. & Cammi, R. Quantum mechanical continuum solvation models. *Chem. Rev.* **105**, 2999–3094 (2005).
21. Küchle, W. Dolg, M. Stoll, H. & Preuss, H. Energy‐adjusted pseudopotentials for the actinides. Parameter sets and test calculations for thorium and thorium monoxide. *J. Chem. Phys*. **100**, 7535–7542 (1994).
22. Cao, X., Dolg, M. & Stoll, H. Valence basis sets for relativistic energy-consistent small-core actinide pseudopotentials. *J. Chem. Phys*. **118**, 487–496 (2003).
23. Andzelm, J. & Huzinaga, S. Gaussian basis sets for molecular calculations, Elsevier Science, New York, 1984.
24. Hehre, W. J., Ditchfield, R. & Pople, J. A. Self-consistent molecular orbital methods. XII. Further extensions of Gaussian-type basis sets for use in molecular orbital studies of organic molecules. *J. Chem. Phys*. **56**, 2257–2261 (1972).
25. Dill, J. D. & Pople, J. A. Self‐consistent molecular orbital methods. XV. Extended Gaussian‐type basis sets for lithium, beryllium, and boron. *J. Chem. Phys*. **62**, 2921–2923 (1975).
26. Gonzalez, C. & Schlegel, H. B. An improved algorithm for reaction path following. *J. Chem. Phys*. **90**, 2154–2161 (1989).
27. Gonzalez, C. & Schlegel, H. B. Reaction path following in mass-weighted internal coordinates. *J. Chem. Phys*. **94**, 5523–5527 (1990).
28. C. Y. Legault, CYLview, 20; Université de Sherbrooke, **2020**. Available at: <http://www.cylview.org>.

**8. NMR Spectra of Products**


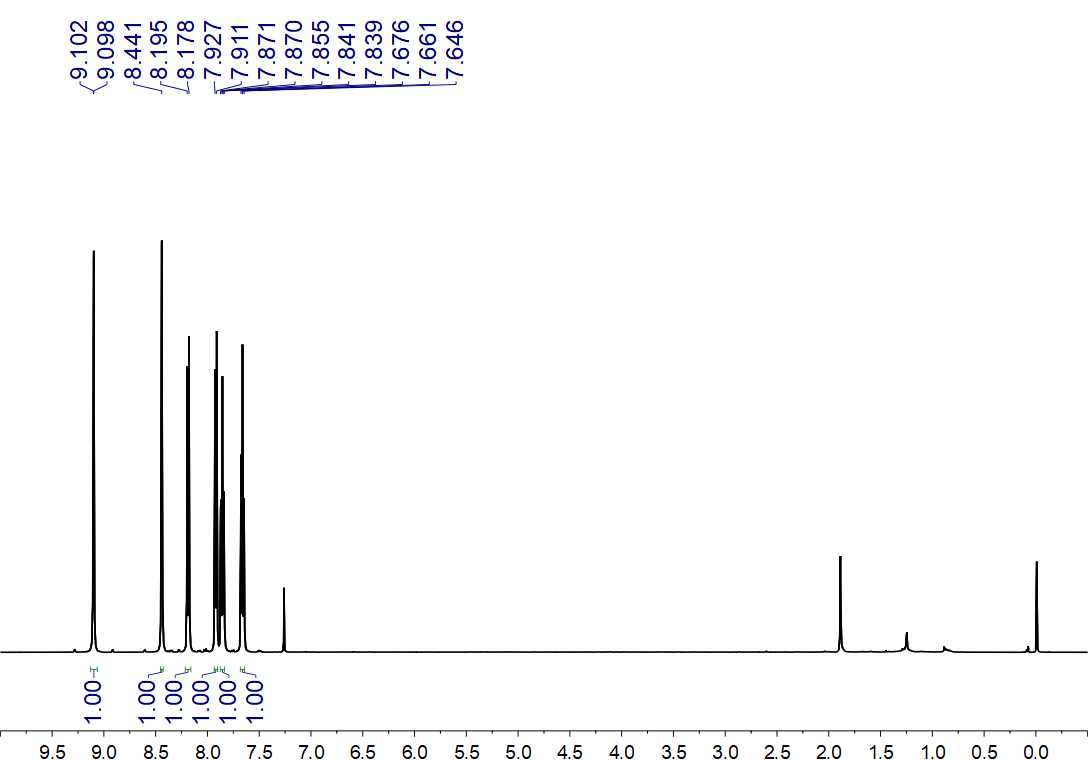


**Fig. S21**. **1H NMR** (500 MHz, CDCl3) spectrum of **3**


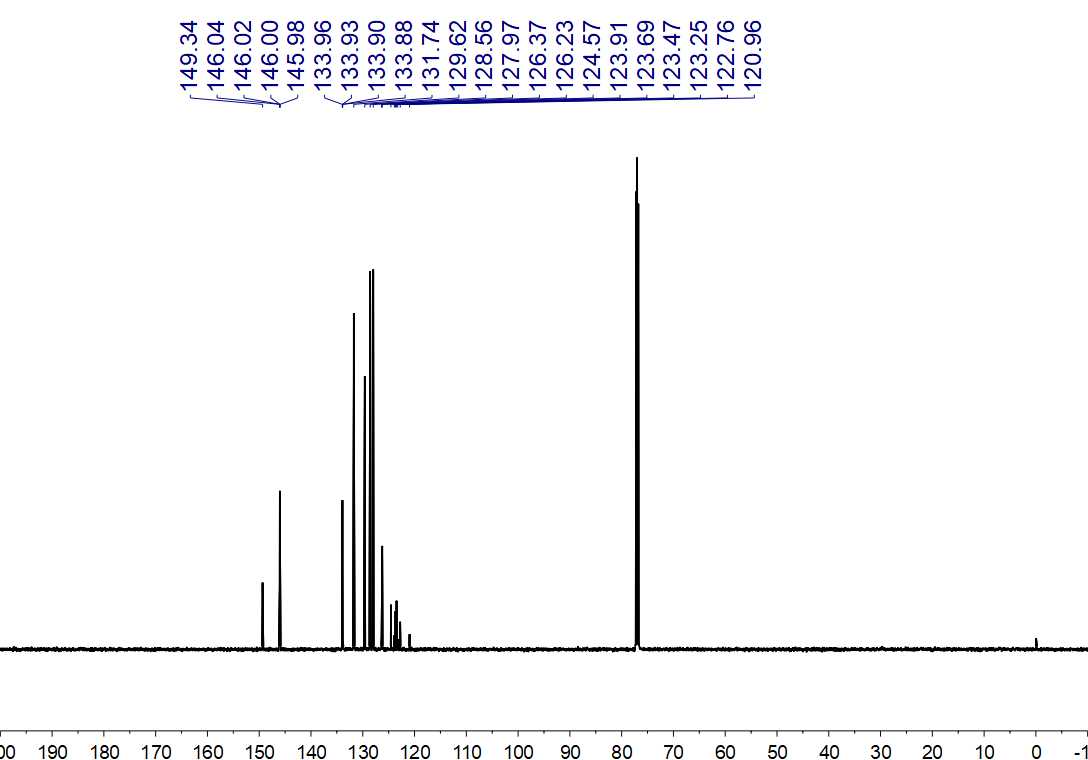


**Fig. S22**. **13C NMR** (150 MHz, CDCl3) spectrum of **3**


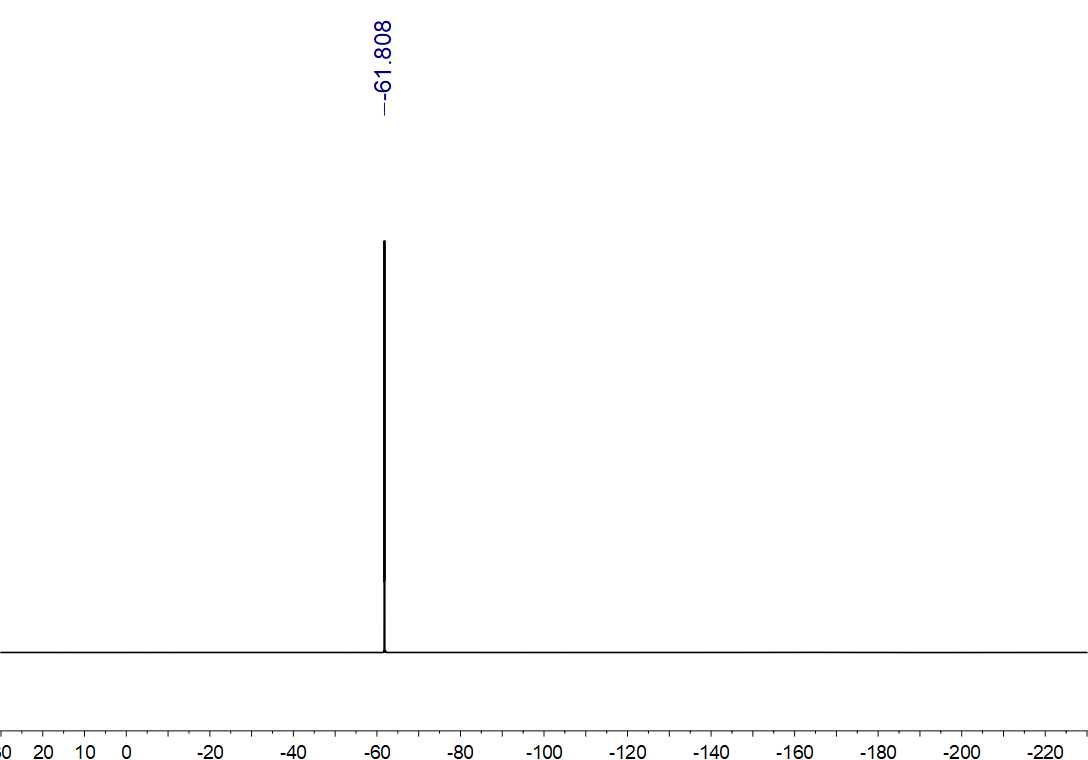


**Fig. S23**. **19F NMR** (564 MHz, CDCl3) spectrum of **3**


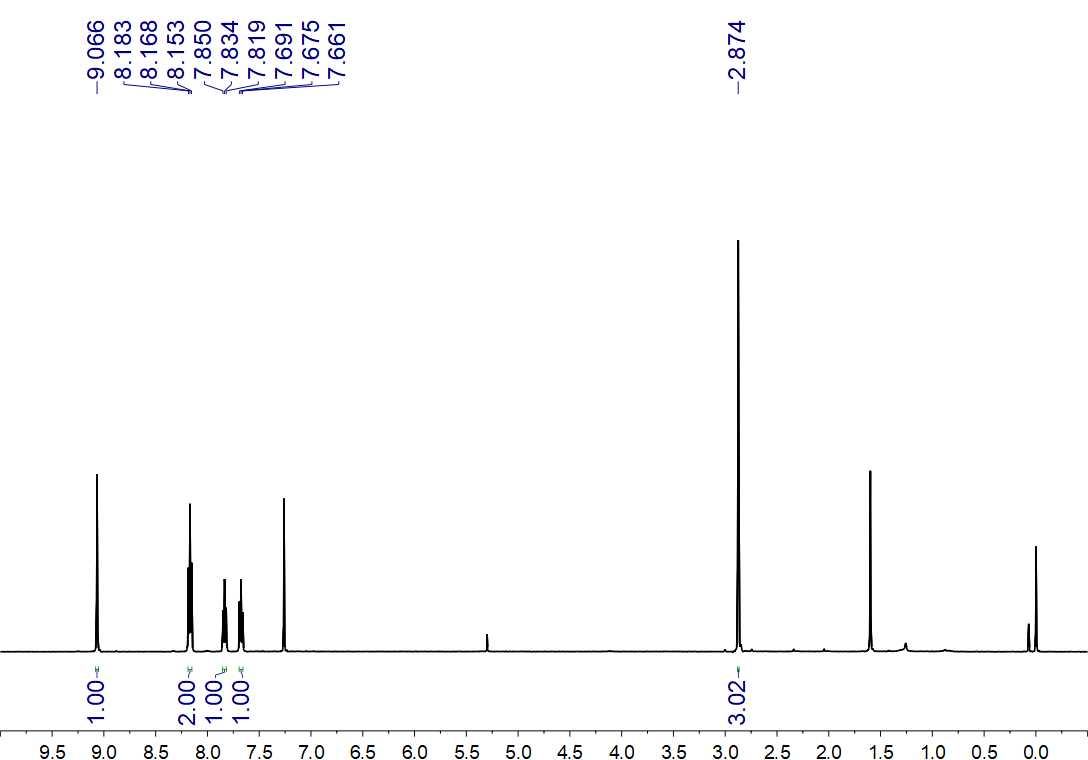


**Fig. S24**. **1H NMR** (500 MHz, CDCl3) spectrum of **4**


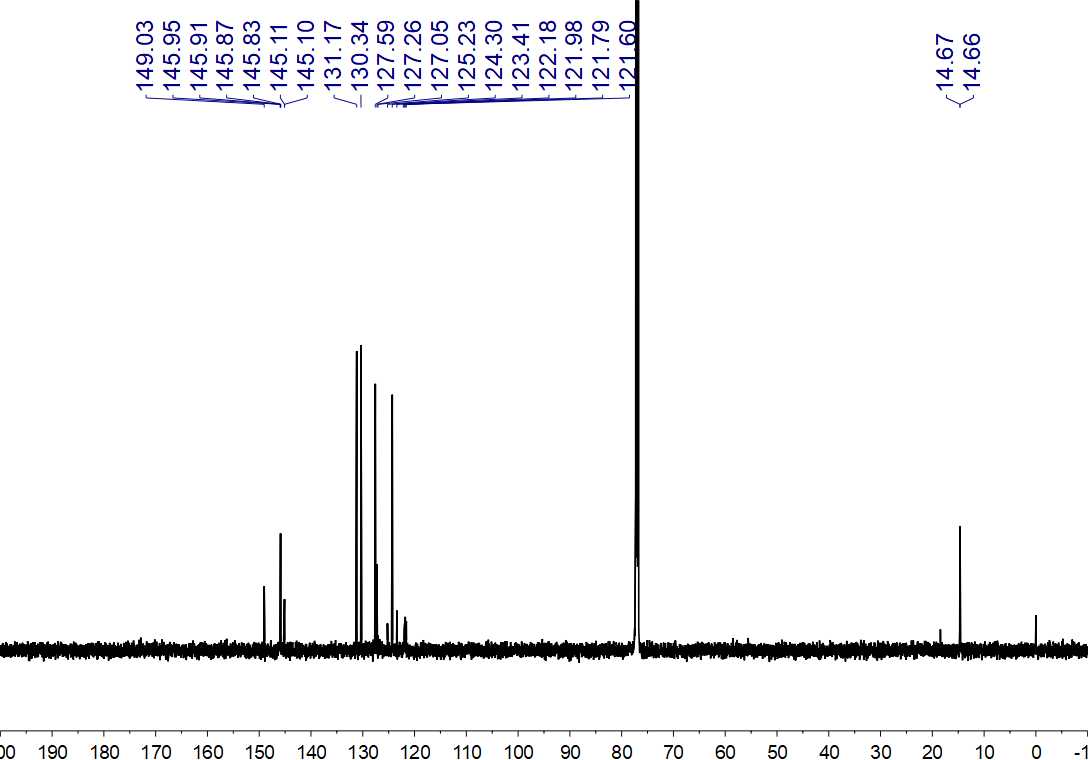


**Fig. S25**. **13C NMR** (150 MHz, CDCl3) spectrum of **4**


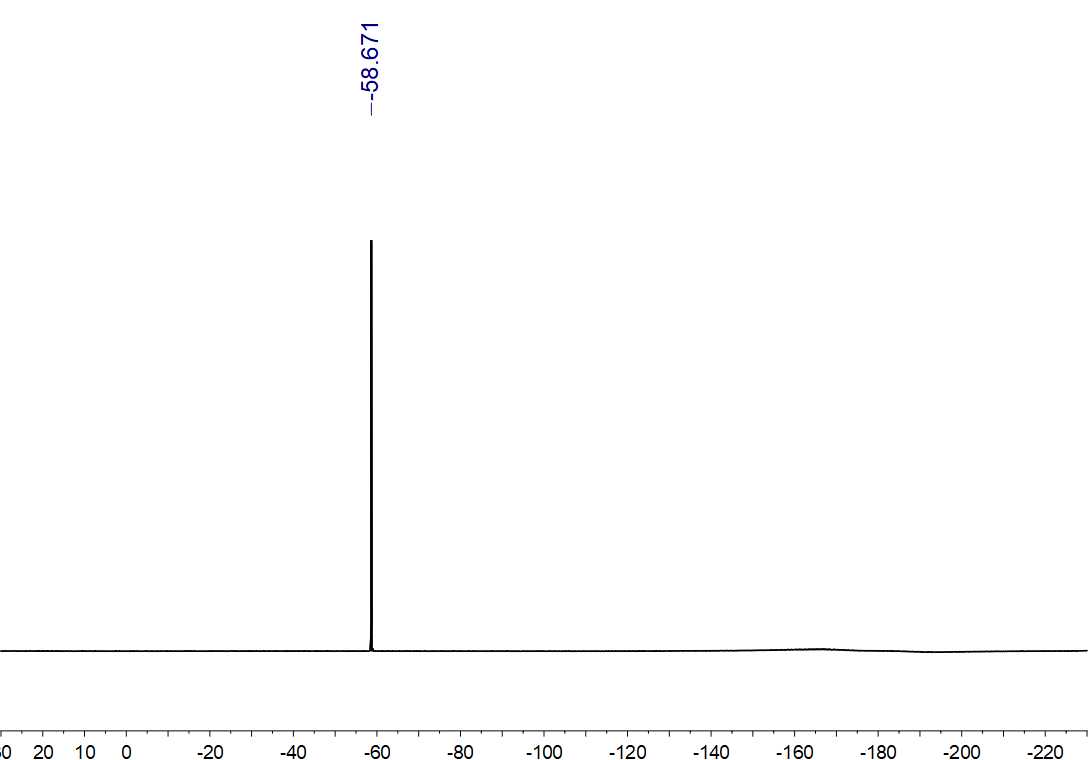


**Fig. S26**. **19F NMR** (564 MHz, CDCl3) spectrum of **4**


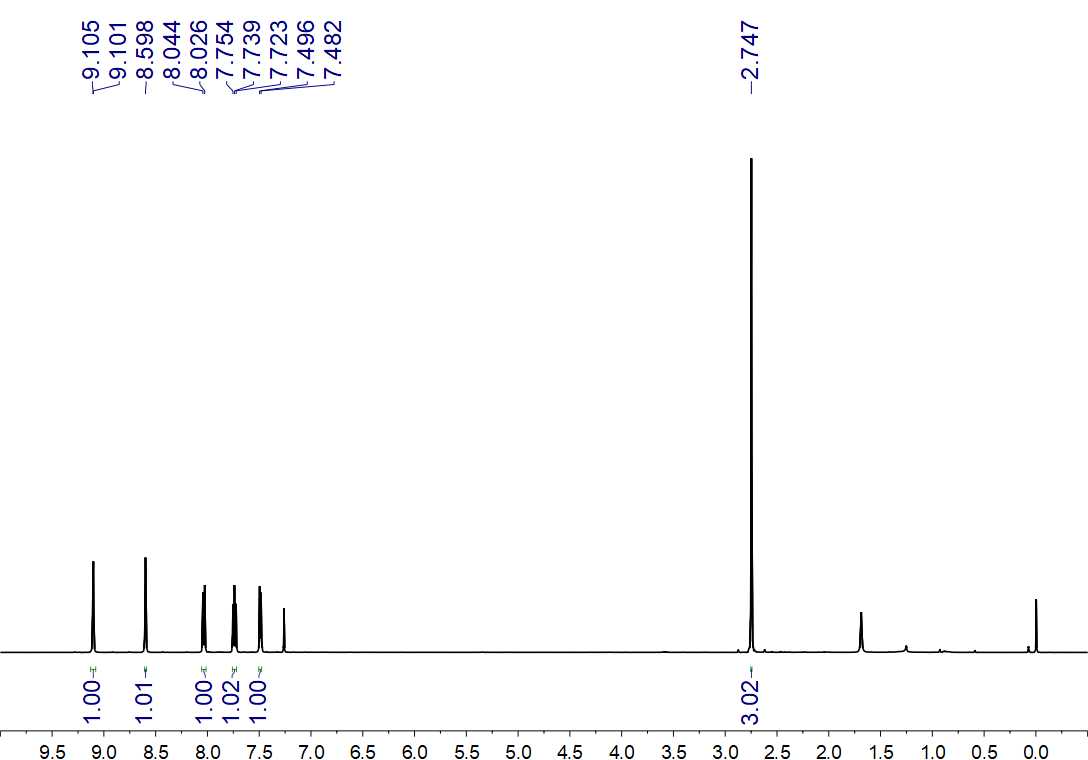


**Fig. S27**. **1H NMR** (500 MHz, CDCl3) spectrum of **5**


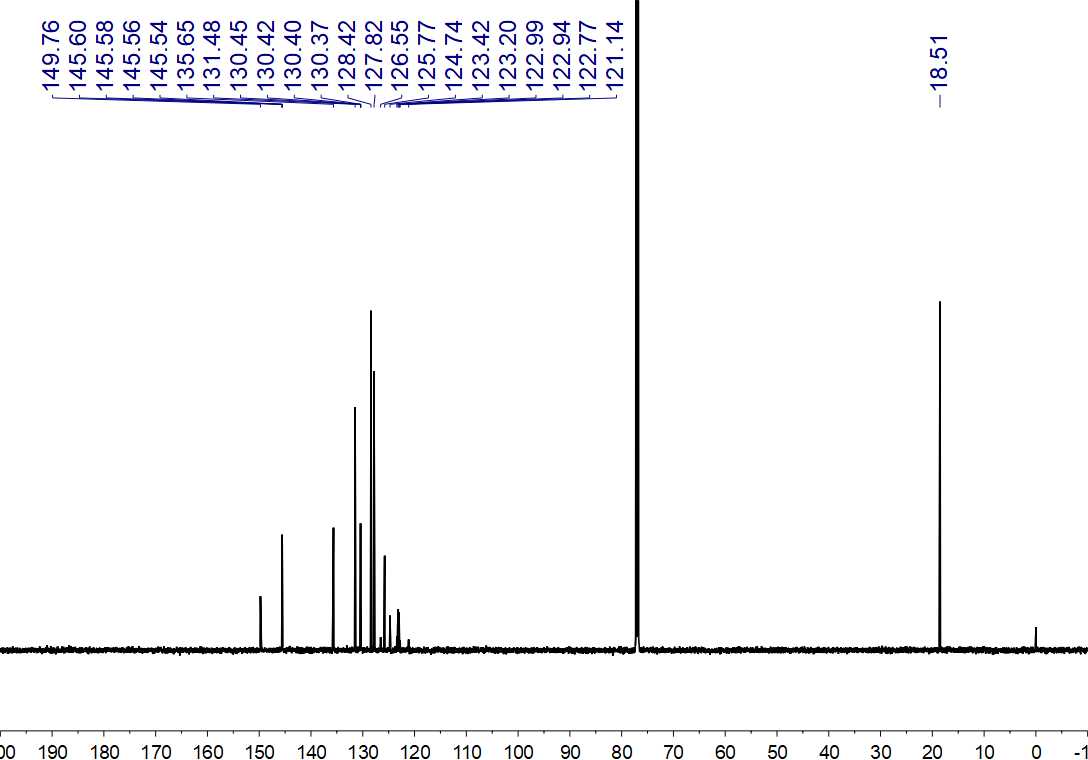


**Fig. S28**. **13C NMR** (150 MHz, CDCl3) spectrum of **5**


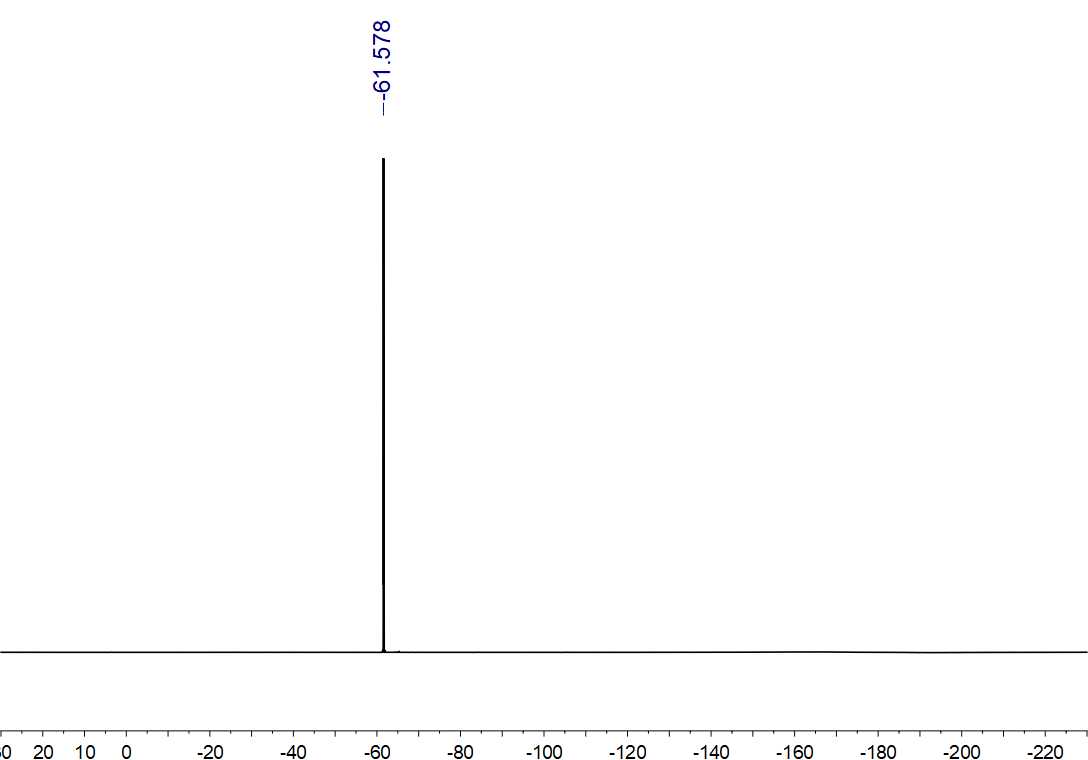


**Fig. S29**. **19F NMR** (564 MHz, CDCl3) spectrum of **5**

**
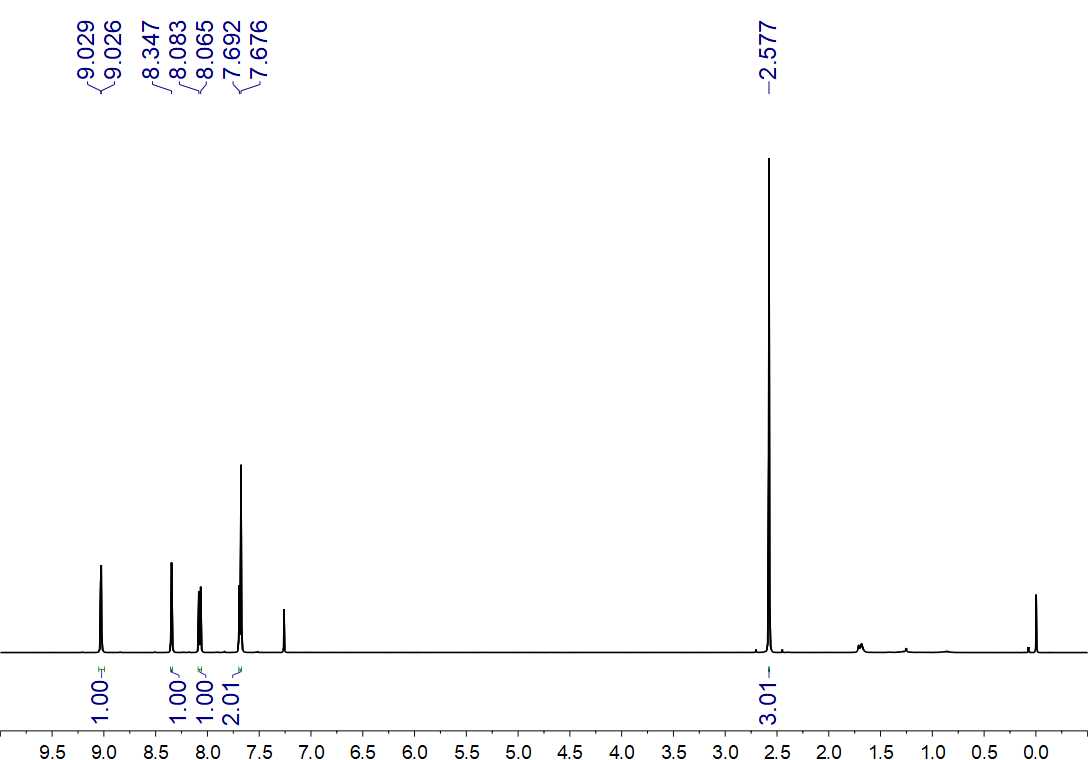
**

**Fig. S30**. **1H NMR** (500 MHz, CDCl3) spectrum of **6**


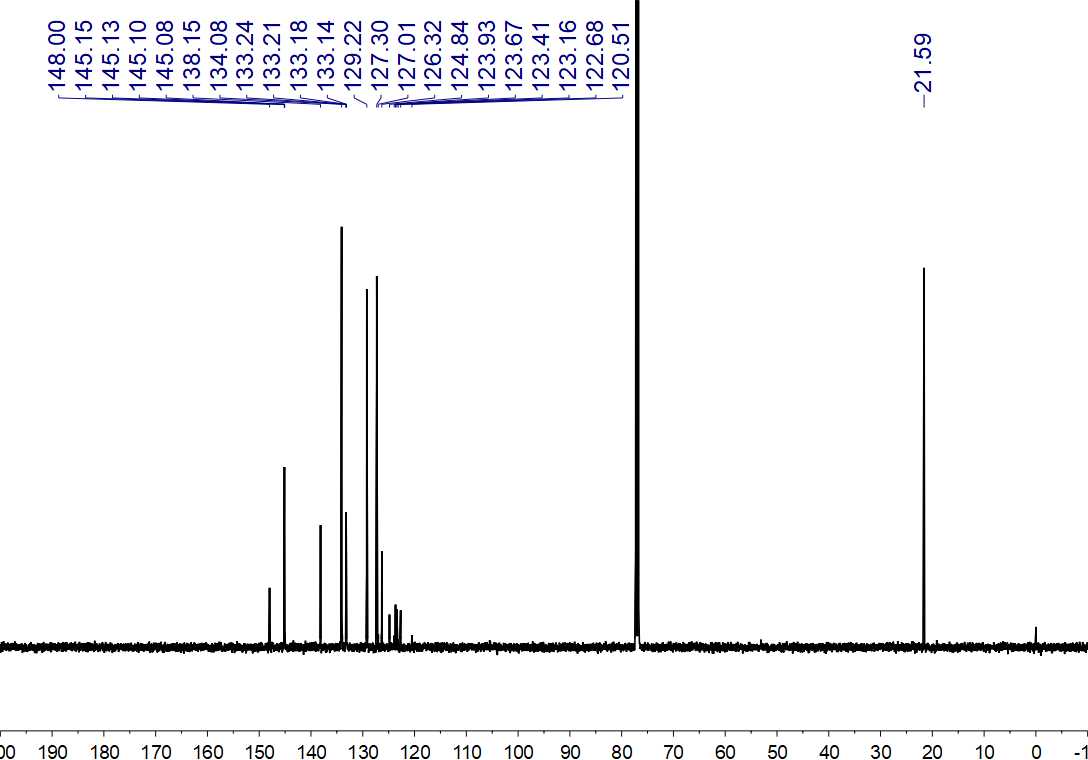


**Fig. S30**. **13C NMR** (125 MHz, CDCl3) spectrum of **6**


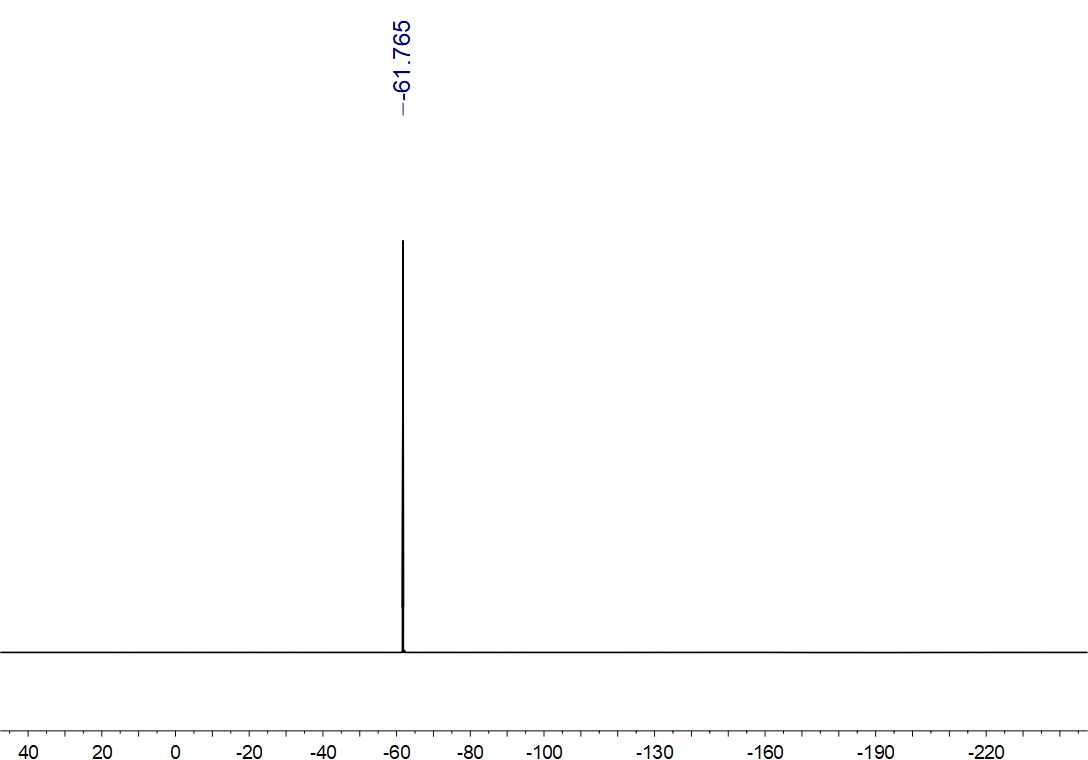


**Fig. S32**. **19F NMR** (470 MHz, CDCl3) spectrum of **6**

**
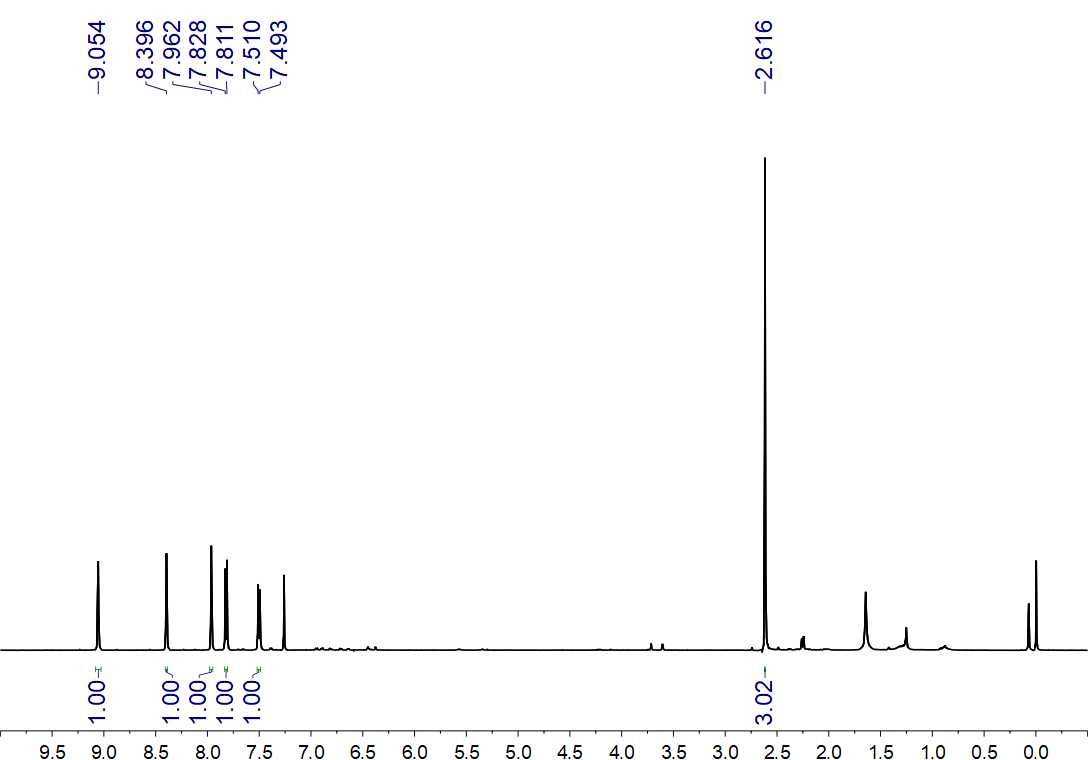
**

**Fig. S33**. **1H NMR** (500 MHz, CDCl3) spectrum of **7**


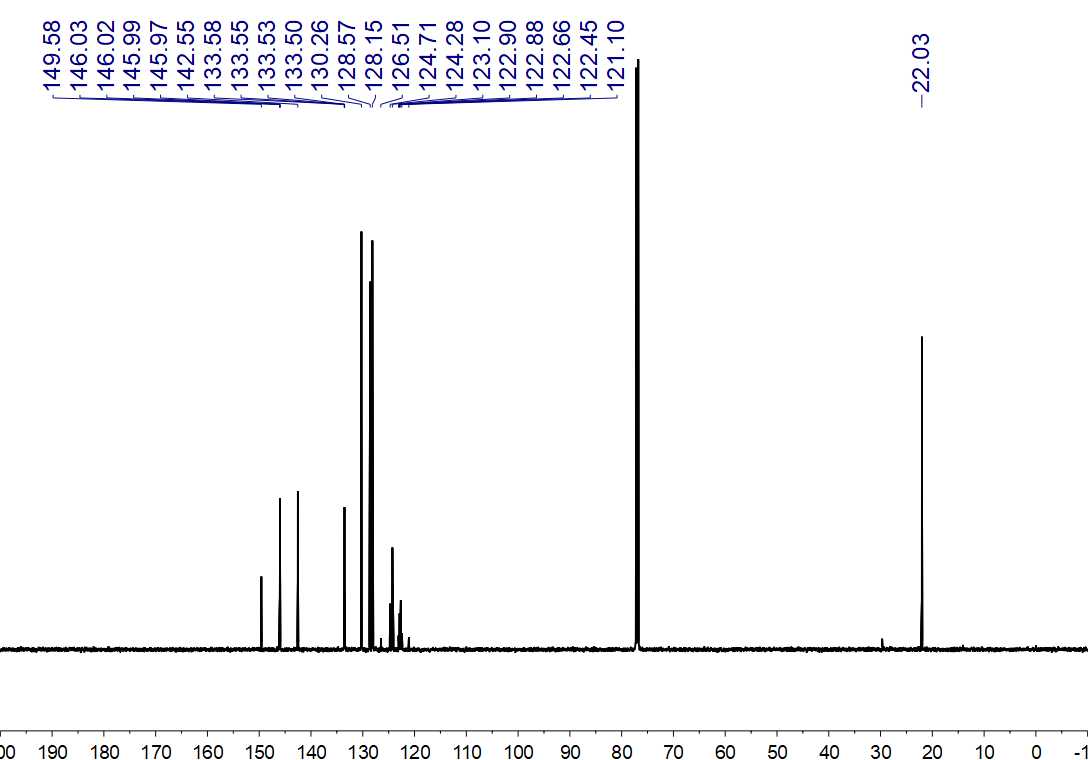


**Fig. S34**. **13C NMR** (150 MHz, CDCl3) spectrum of **7**


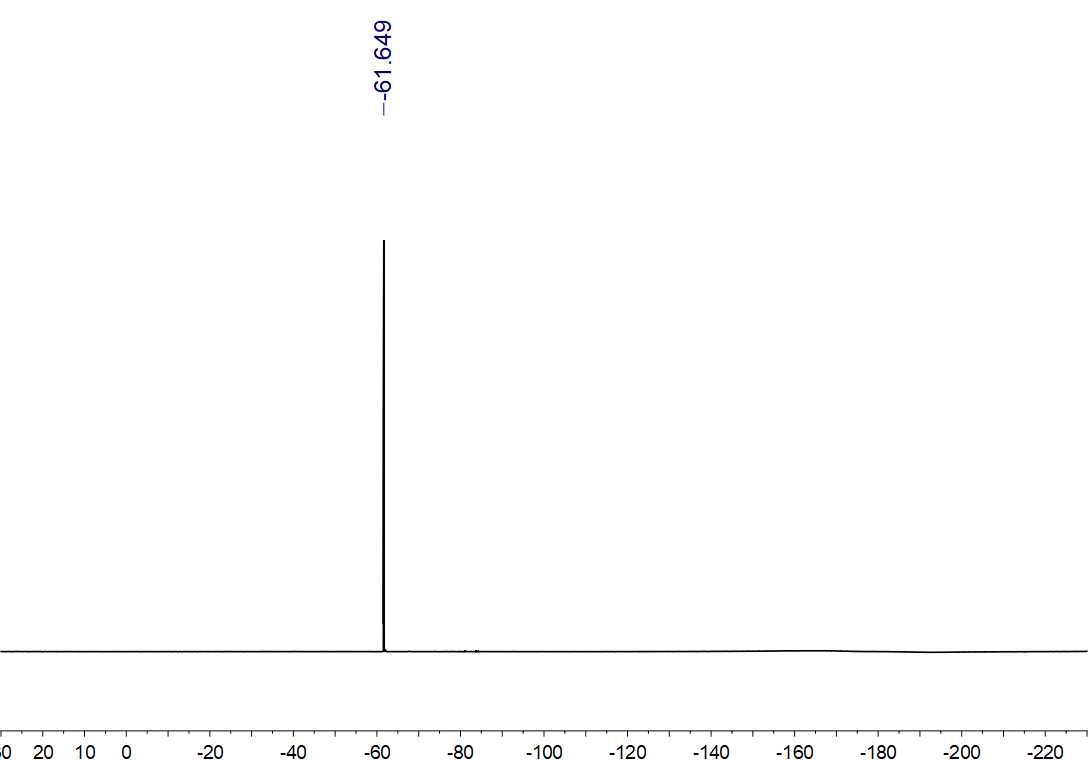


**Fig. S35**. **19F NMR** (564 MHz, CDCl3) spectrum of **7**

**
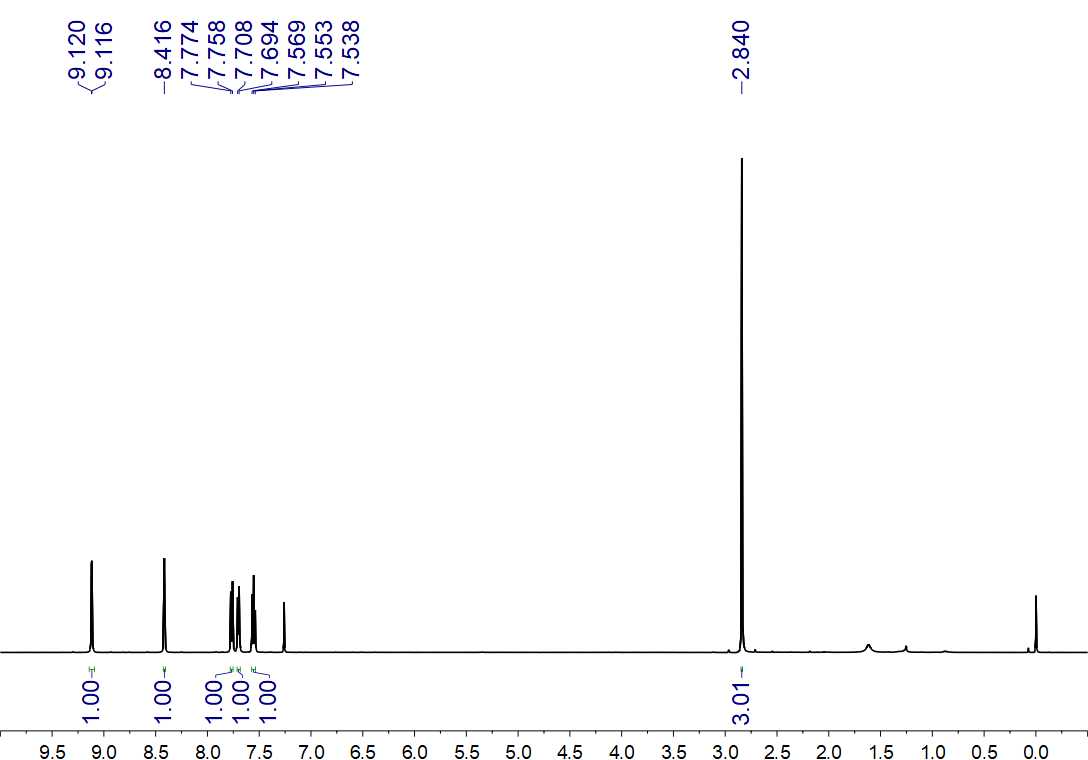
**

**Fig. S36**. **1H NMR** (500 MHz, CDCl3) spectrum of **8**


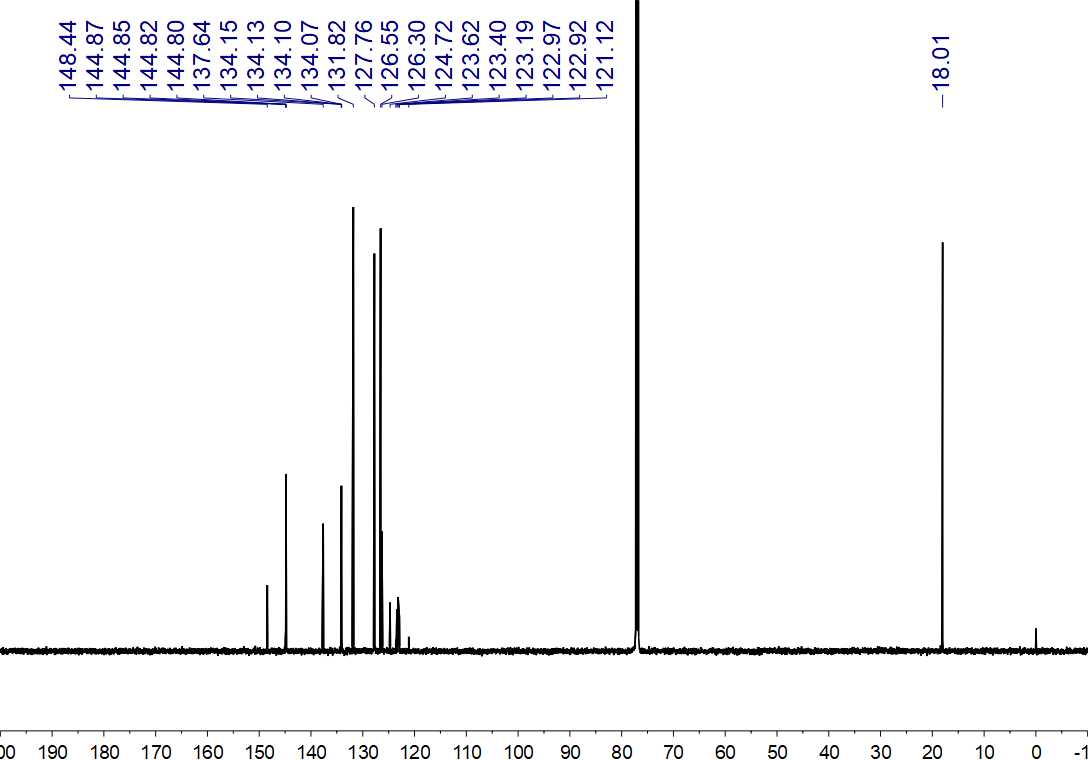


**Fig. S37**. **13C NMR** (150 MHz, CDCl3) spectrum of **8**


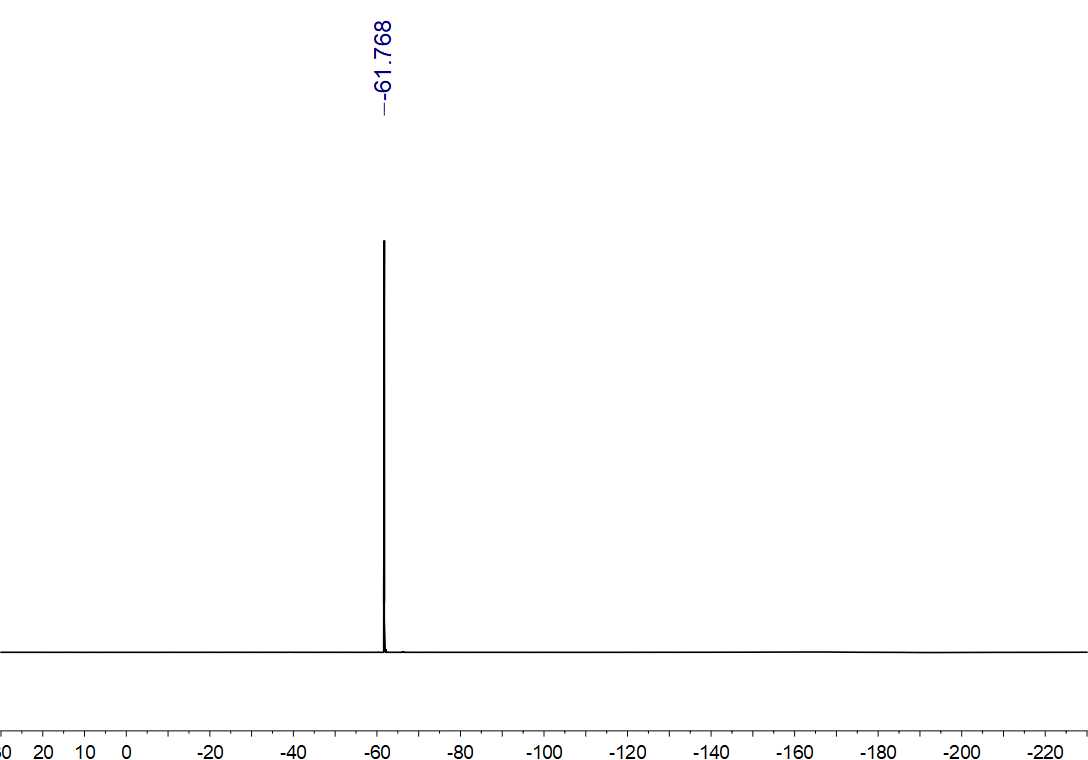


**Fig. S38**. **19F NMR** (564 MHz, CDCl3) spectrum of **8**

**
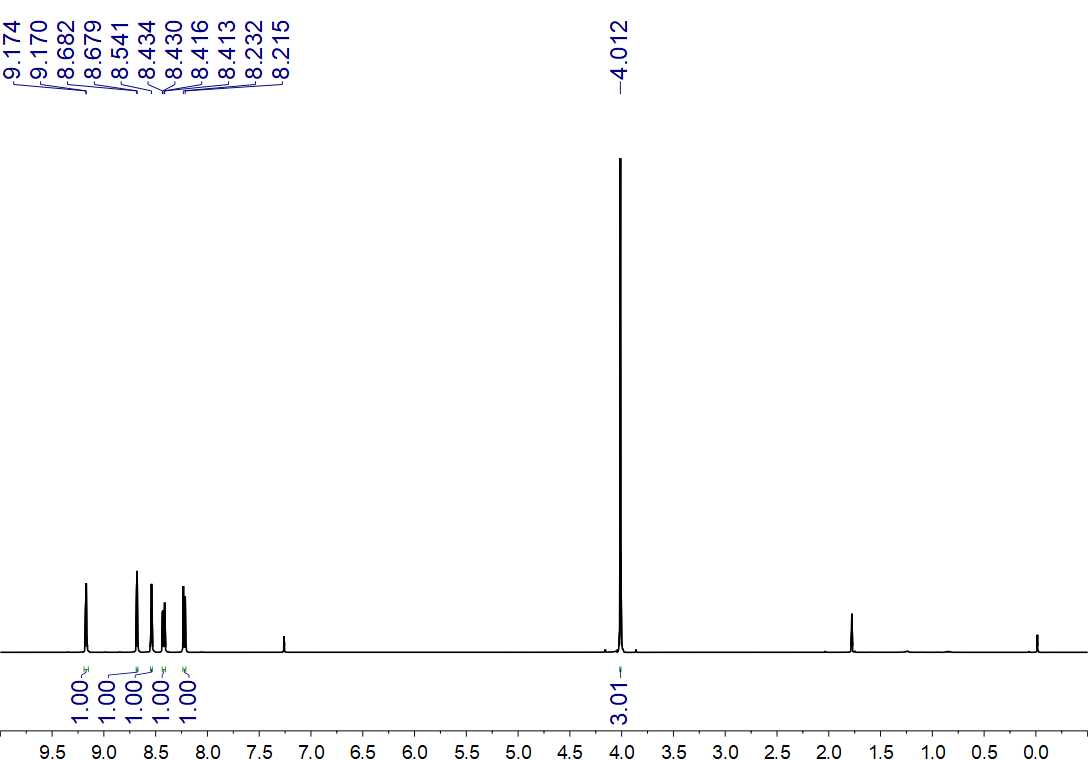
**

**Fig. S39**. **1H NMR** (500 MHz, CDCl3) spectrum of **9**


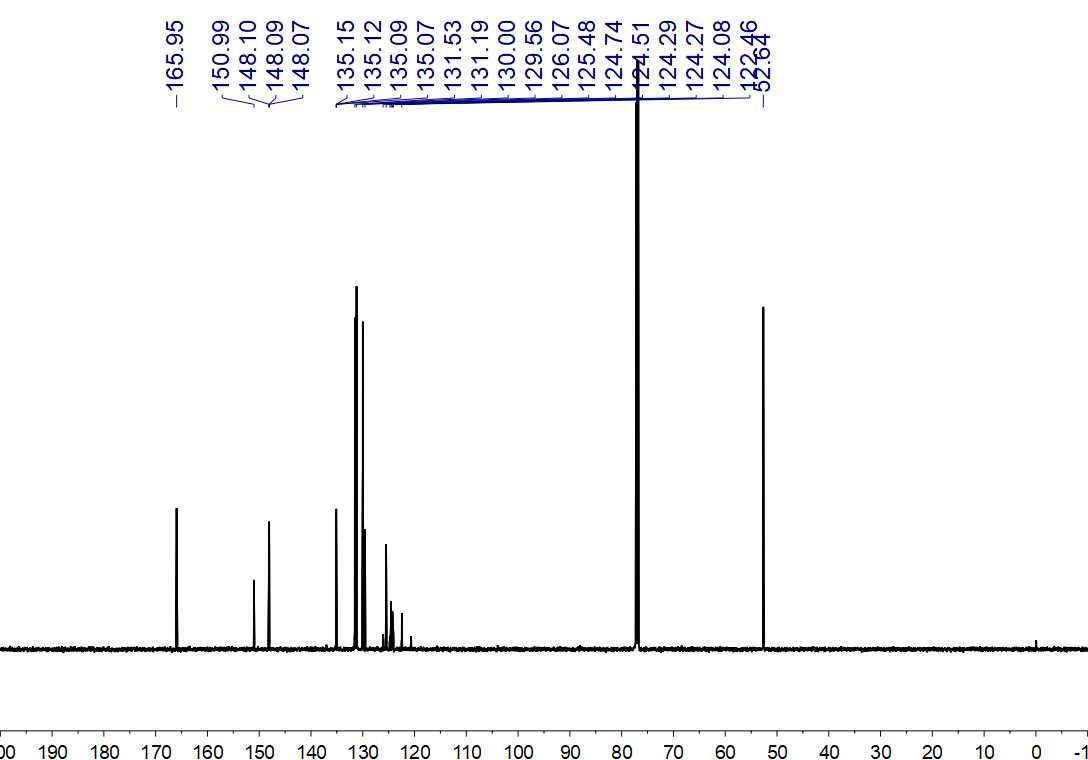


**Fig. S40**. **13C NMR** (150 MHz, CDCl3) spectrum of **9**


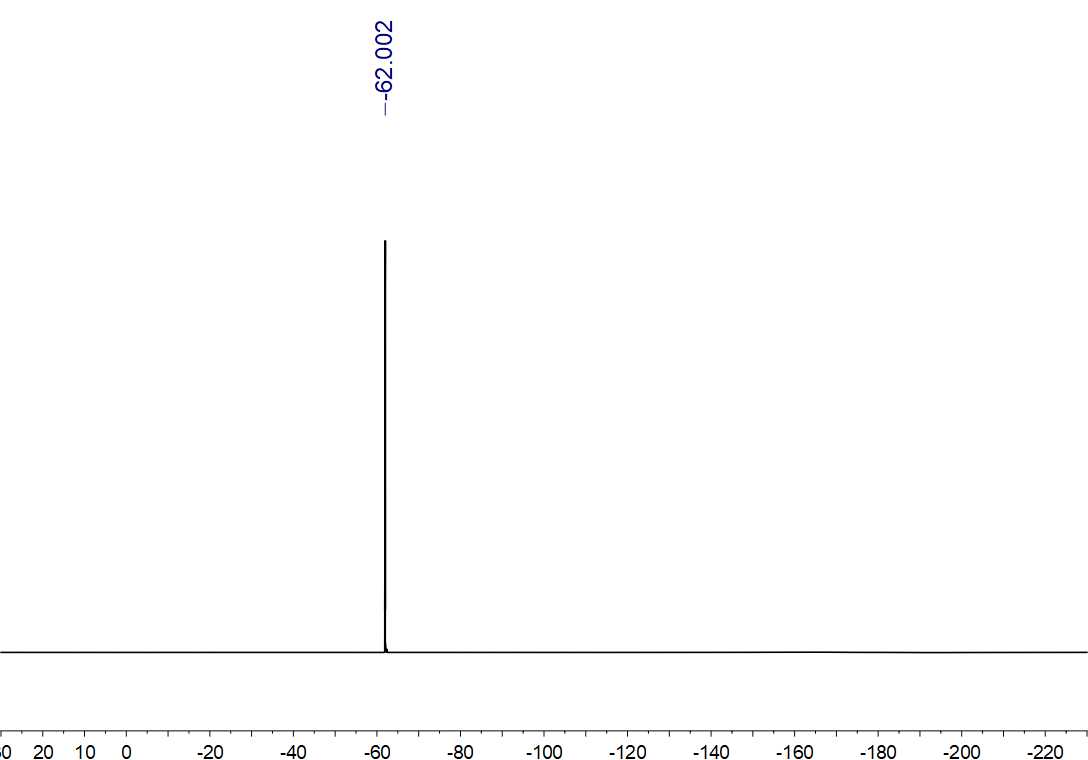


**Fig. S41**. **19F NMR** (564 MHz, CDCl3) spectrum of **9**

**
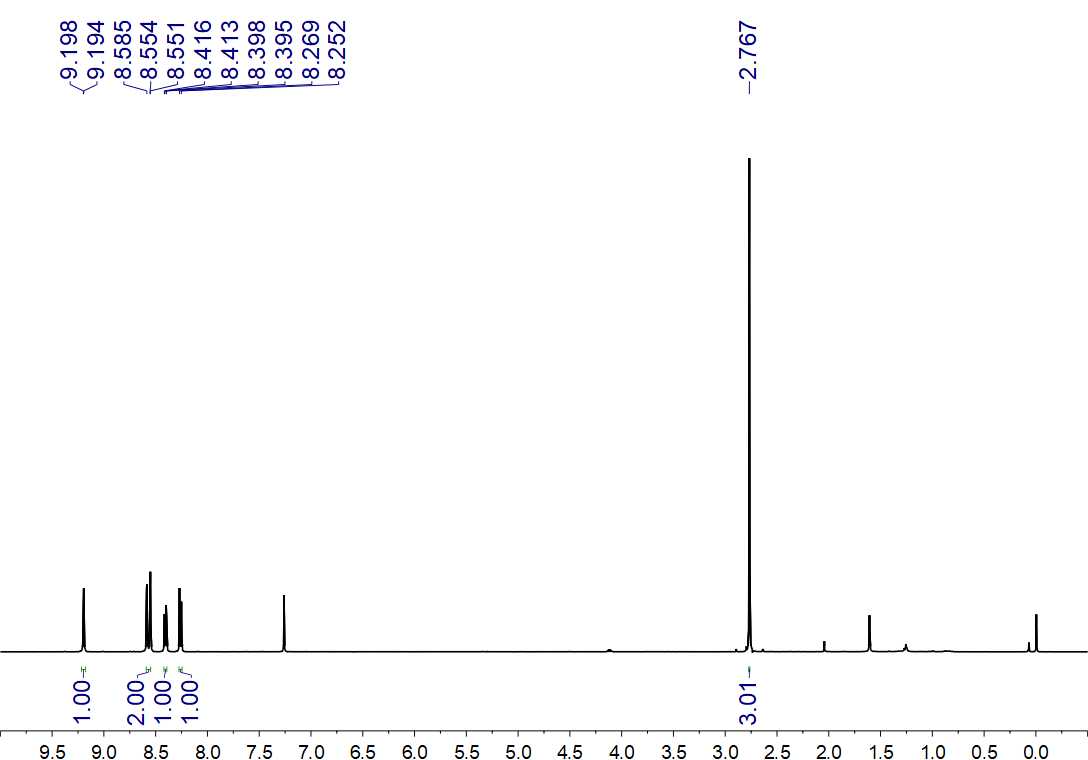
**

**Fig. S42**. **1H NMR** (500 MHz, CDCl3) spectrum of **10**


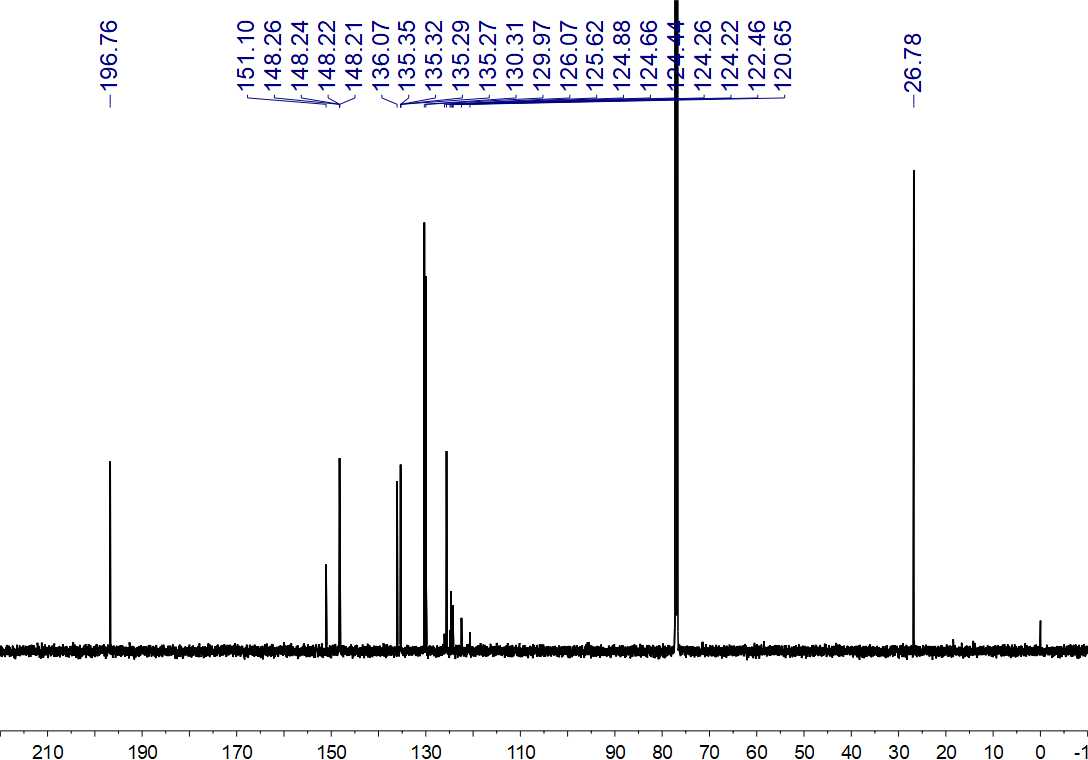


**Fig. S43**. **13C NMR** (150 MHz, CDCl3) spectrum of **10**


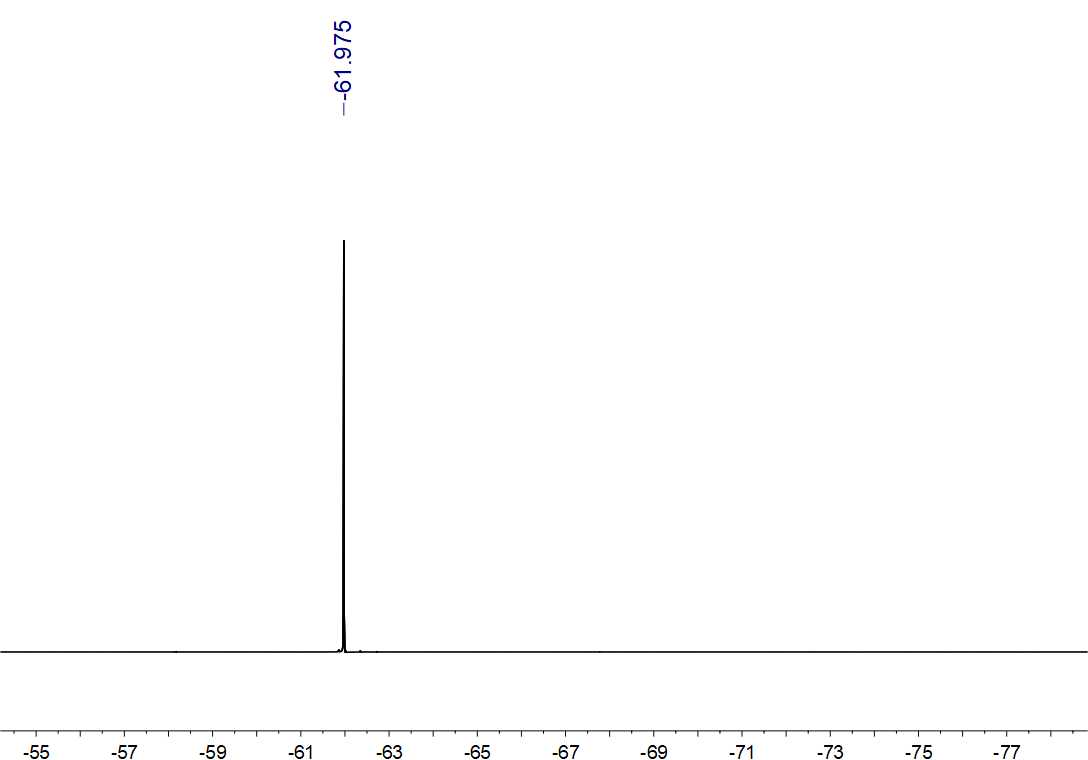


**Fig. S44**. **19F NMR** (564 MHz, CDCl3) spectrum of **10**

**
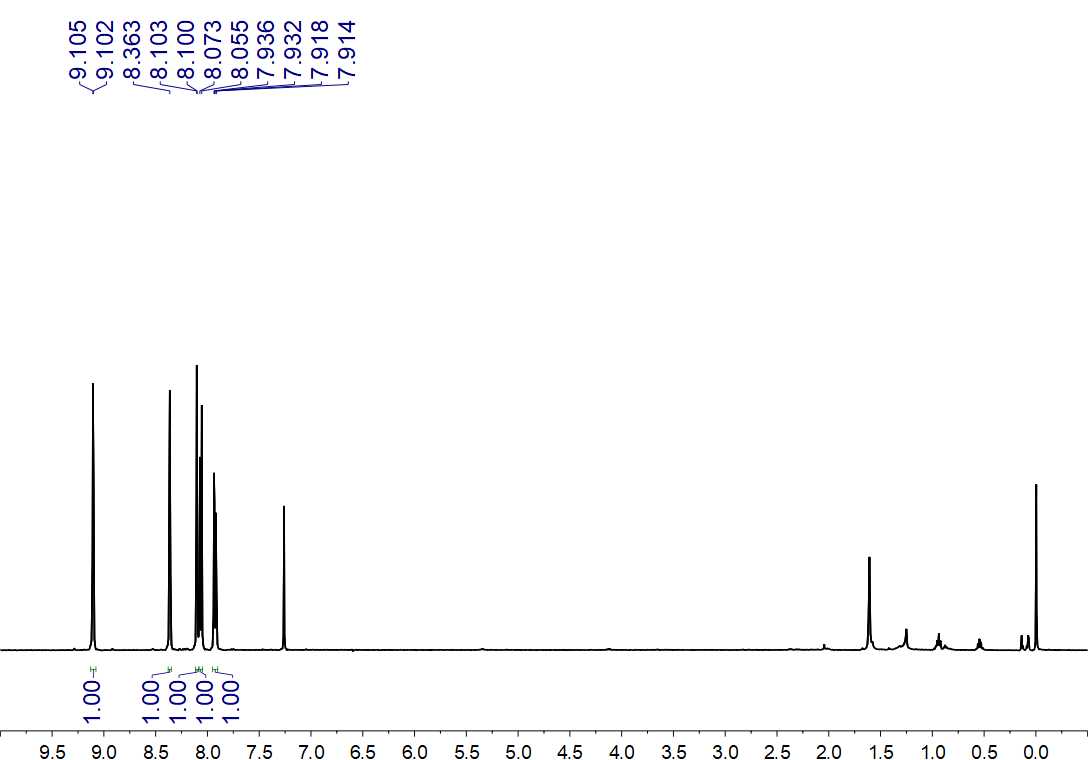
**

**Fig. S45**. **1H NMR** (500 MHz, CDCl3) spectrum of **11**


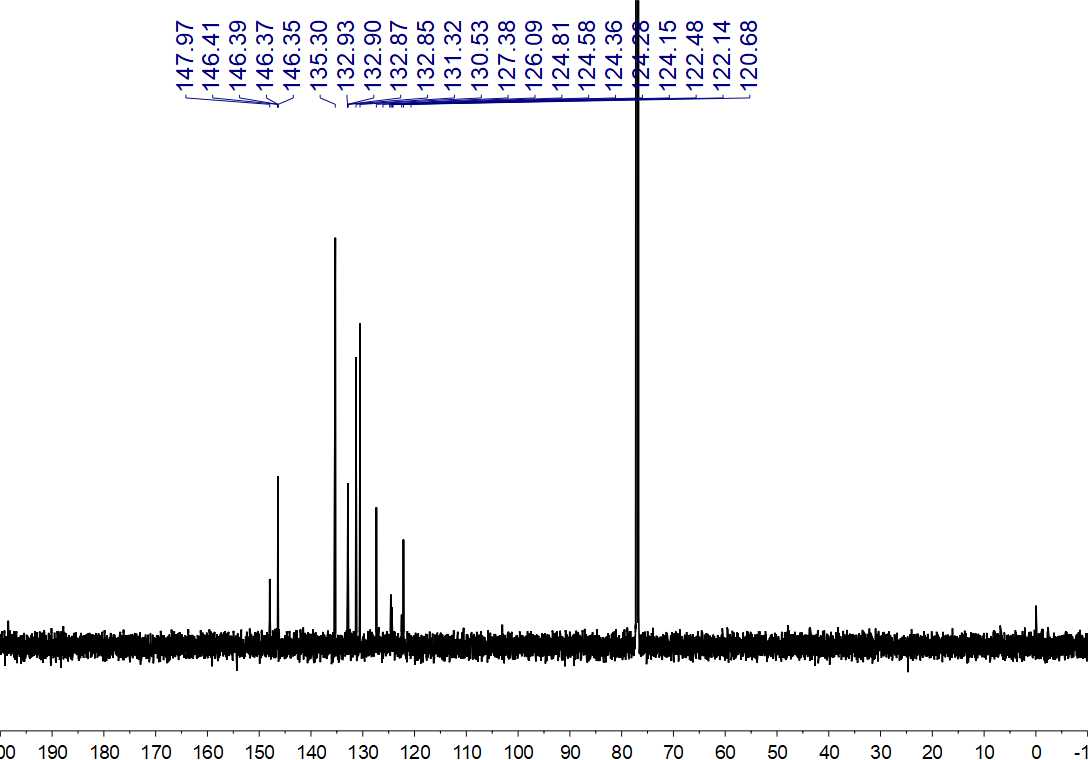


**Fig. S46**. **13C NMR** (150 MHz, CDCl3) spectrum of **11**


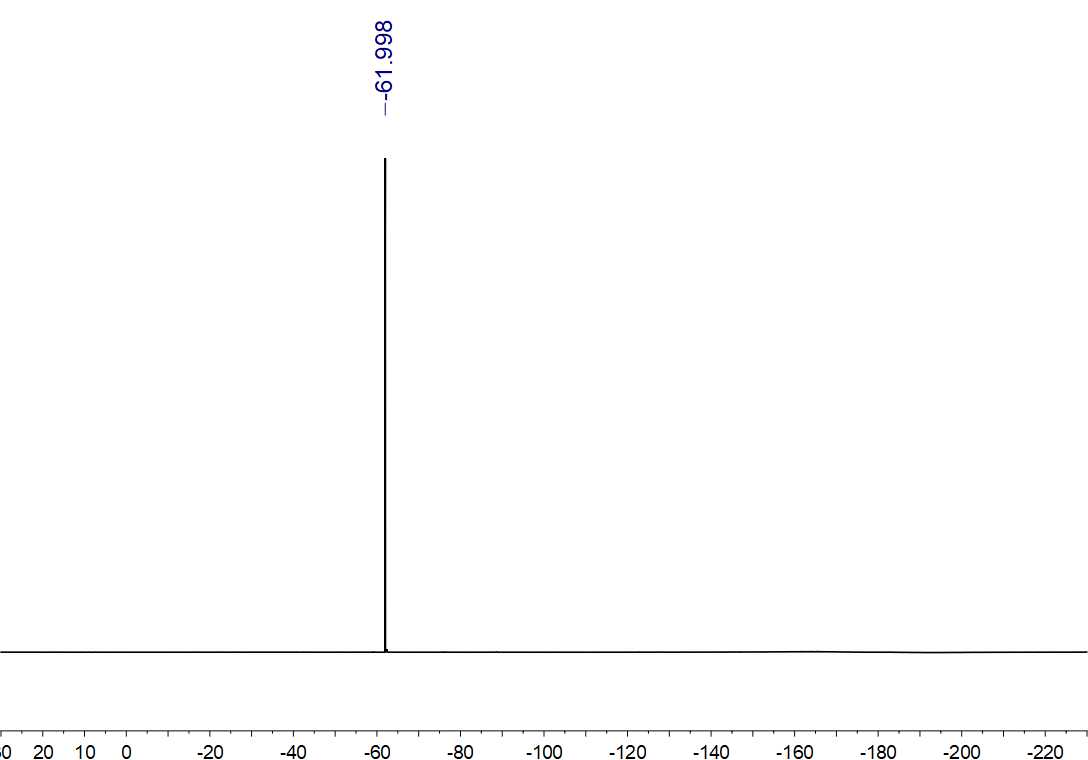


**Fig. S47**. **19F NMR** (564 MHz, CDCl3) spectrum of **11**

**
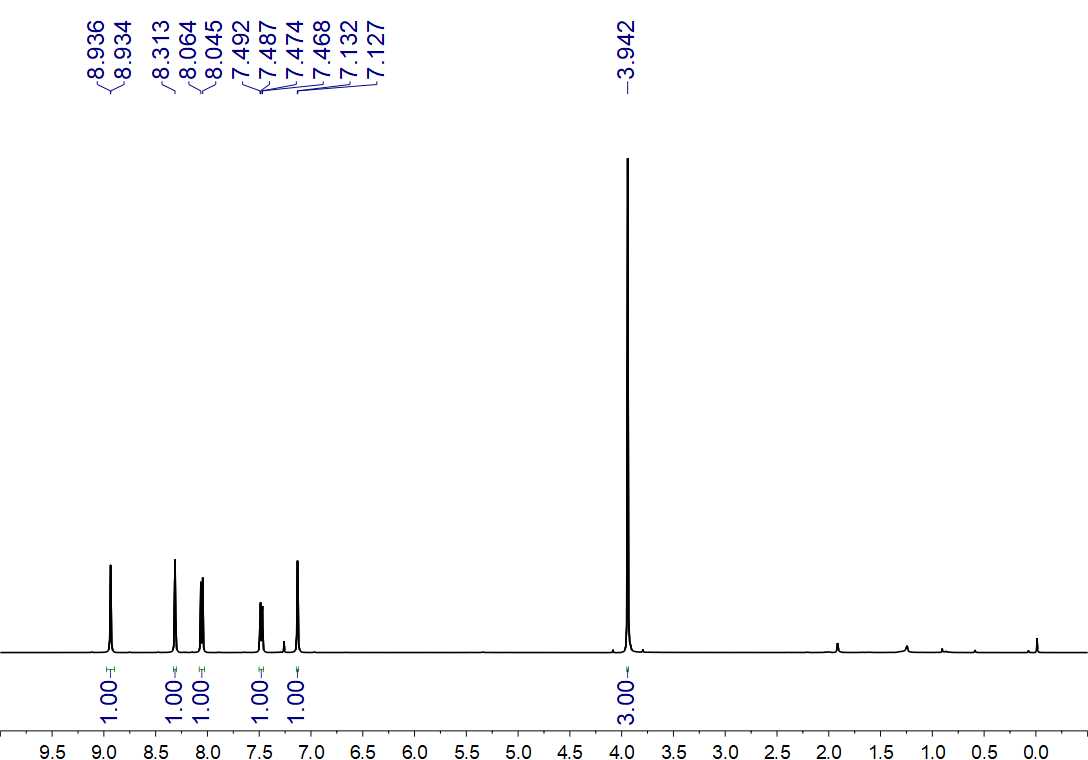
**

**Fig. S48**. **1H NMR** (500 MHz, CDCl3) spectrum of **12**


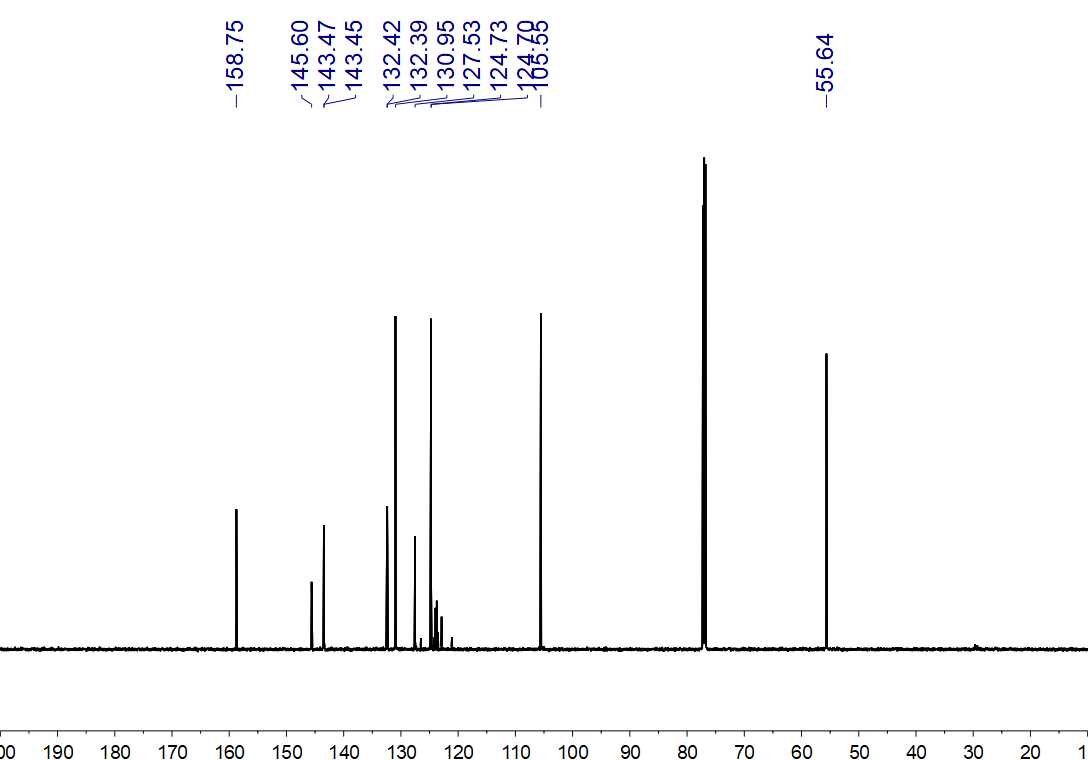


**Fig. S49**. **13C NMR** (150 MHz, CDCl3) spectrum of **12**


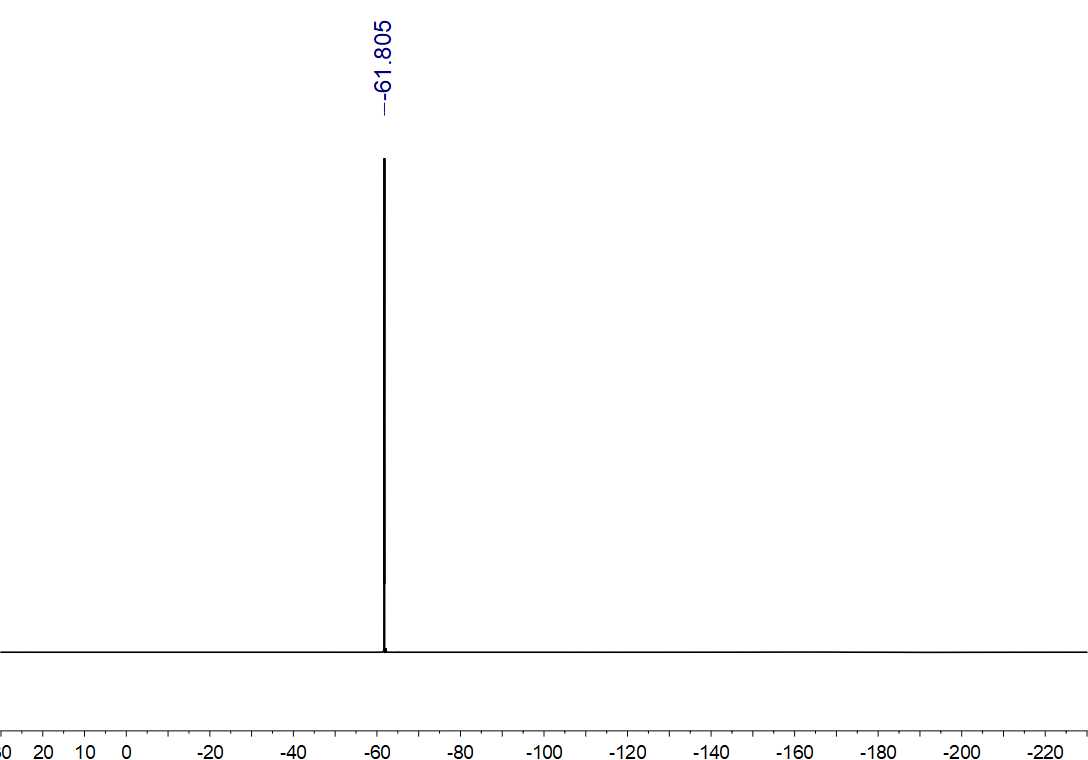


**Fig. S50.** **19F NMR** (564 MHz, CDCl3) spectrum of **12**

**
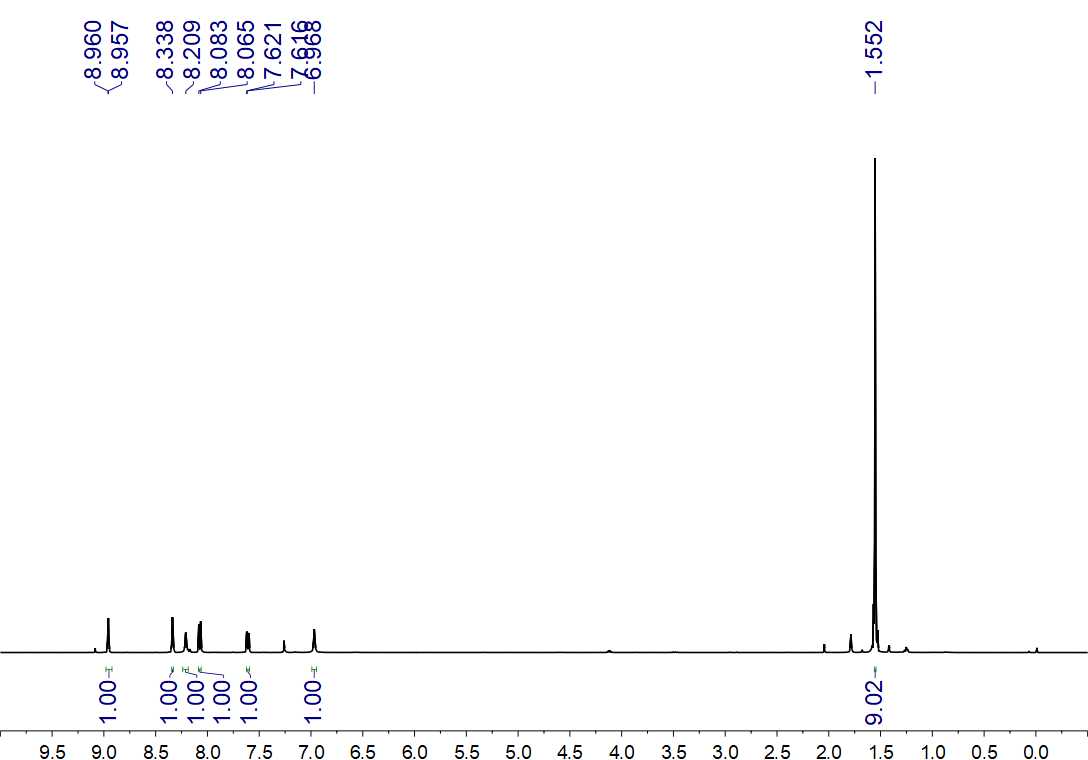
**

**Fig. S51**. **1H NMR** (500 MHz, CDCl3) spectrum of **13**


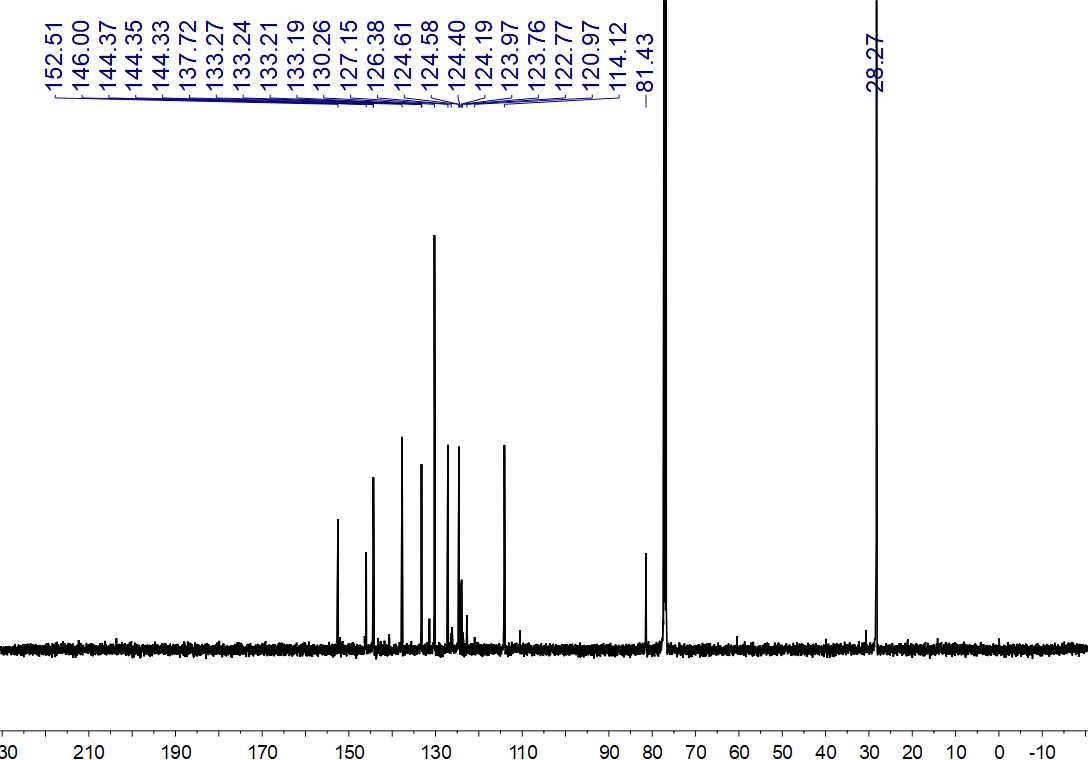


**Fig. S52**. **13C NMR** (150 MHz, CDCl3) spectrum of **13**


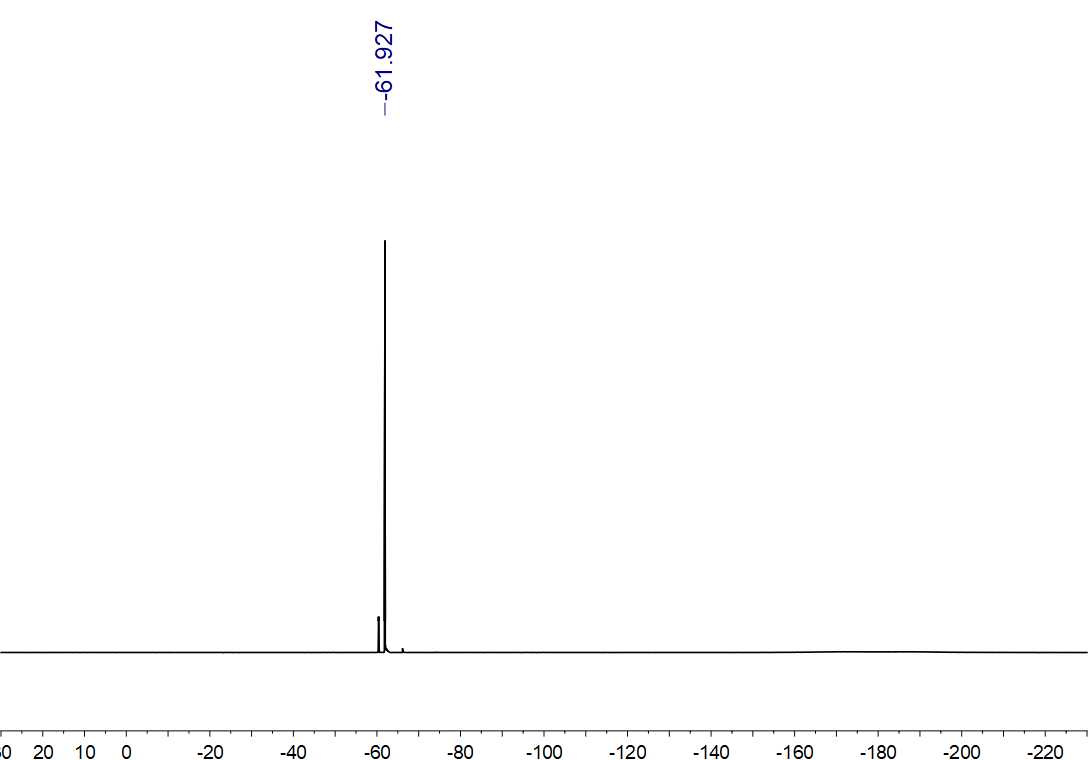


**Fig. S53**. **19F NMR** (564 MHz, CDCl3) spectrum of **13**

**
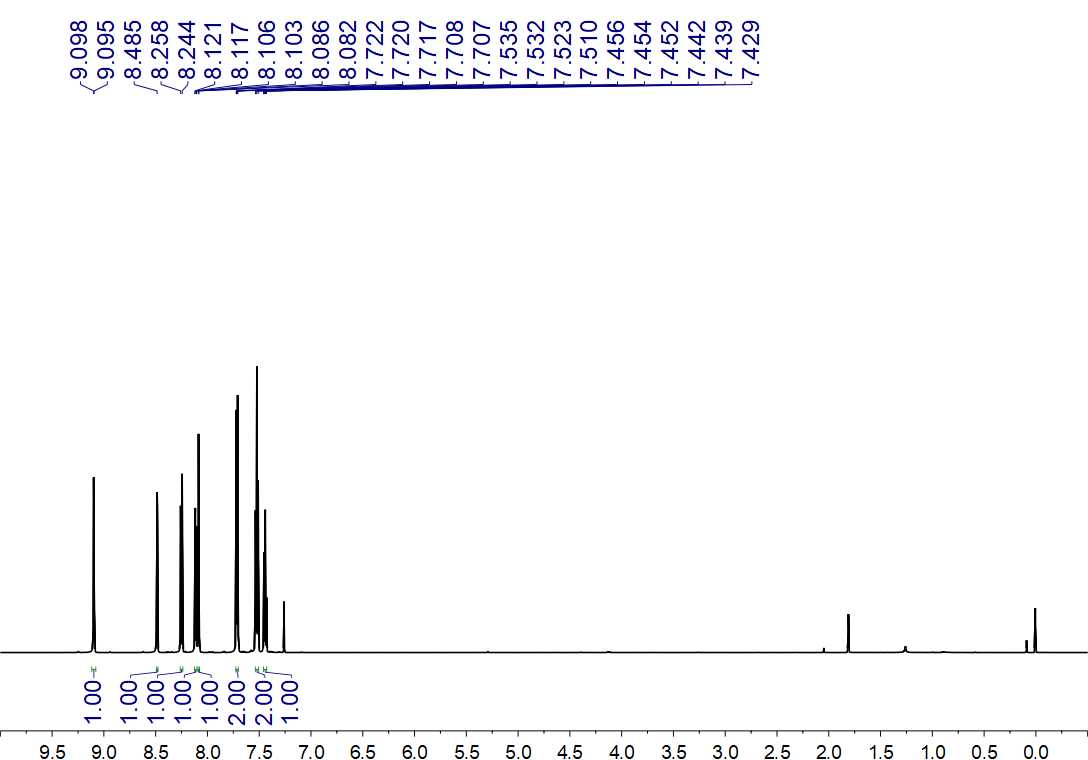
**

**Fig. S54**. **1H NMR** (600 MHz, CDCl3) spectrum of **14**


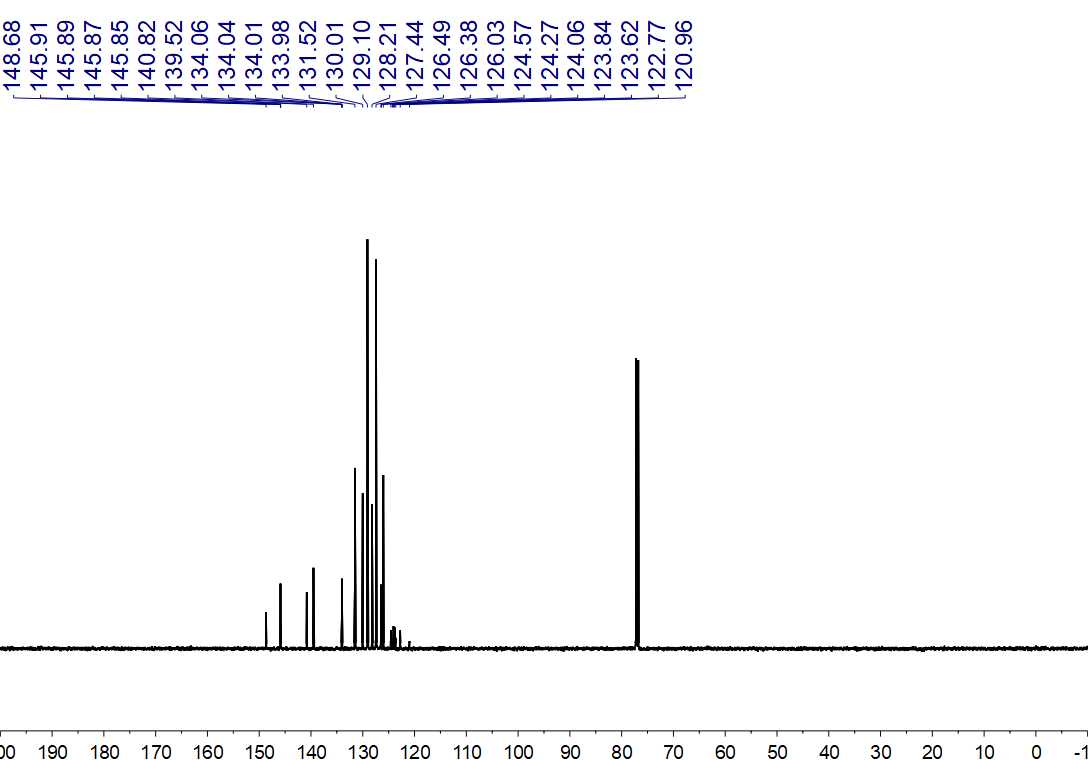


**Fig. S55**. **13C NMR** (150 MHz, CDCl3) spectrum of **14**


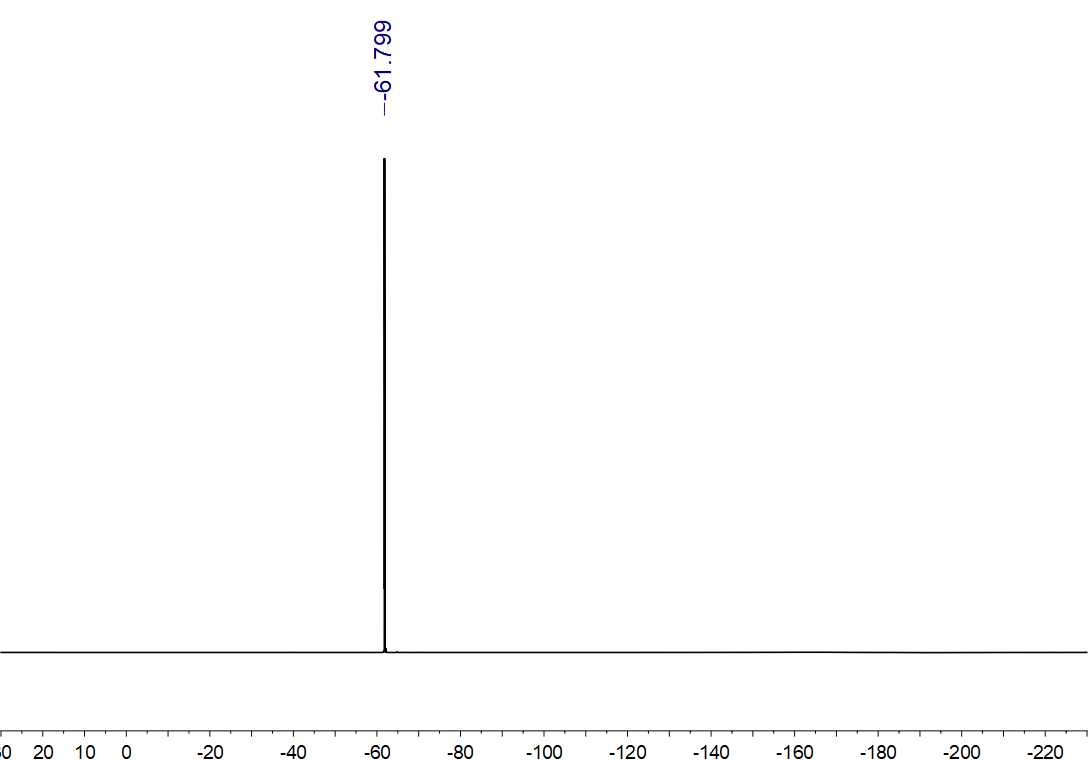


**Fig. S56**. **19F NMR** (564 MHz, CDCl3) spectrum of **14**

**
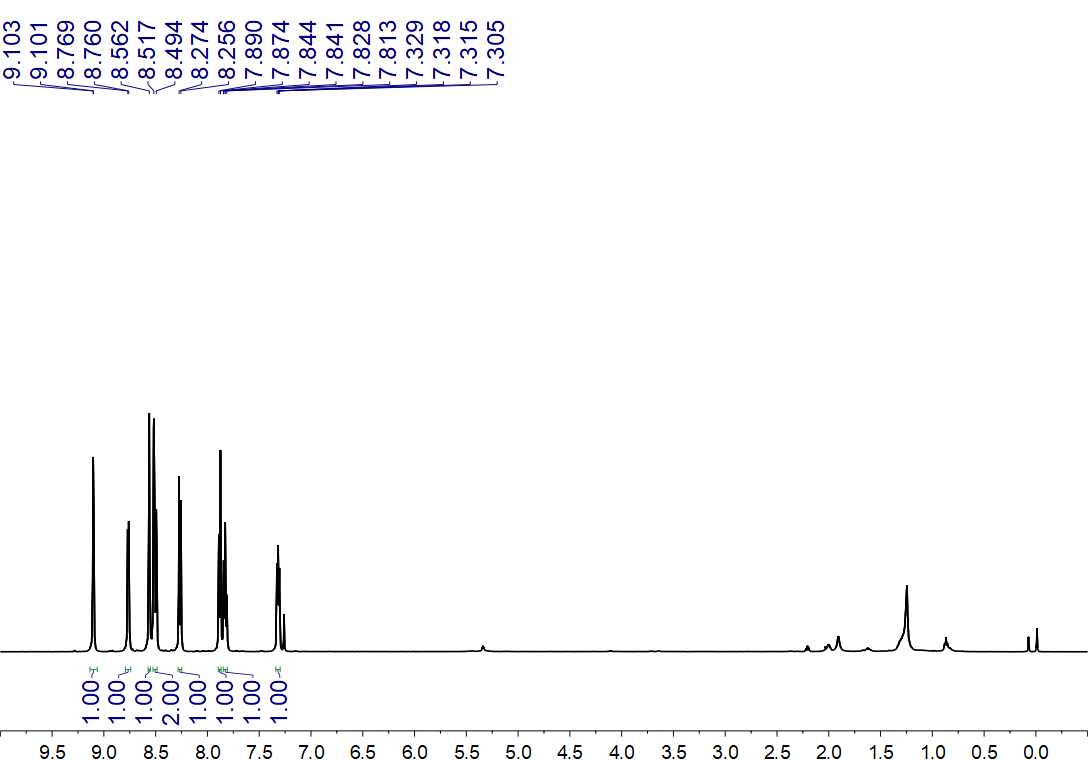
**

**Fig. S57**. **1H NMR** (500 MHz, CDCl3) spectrum of **15**


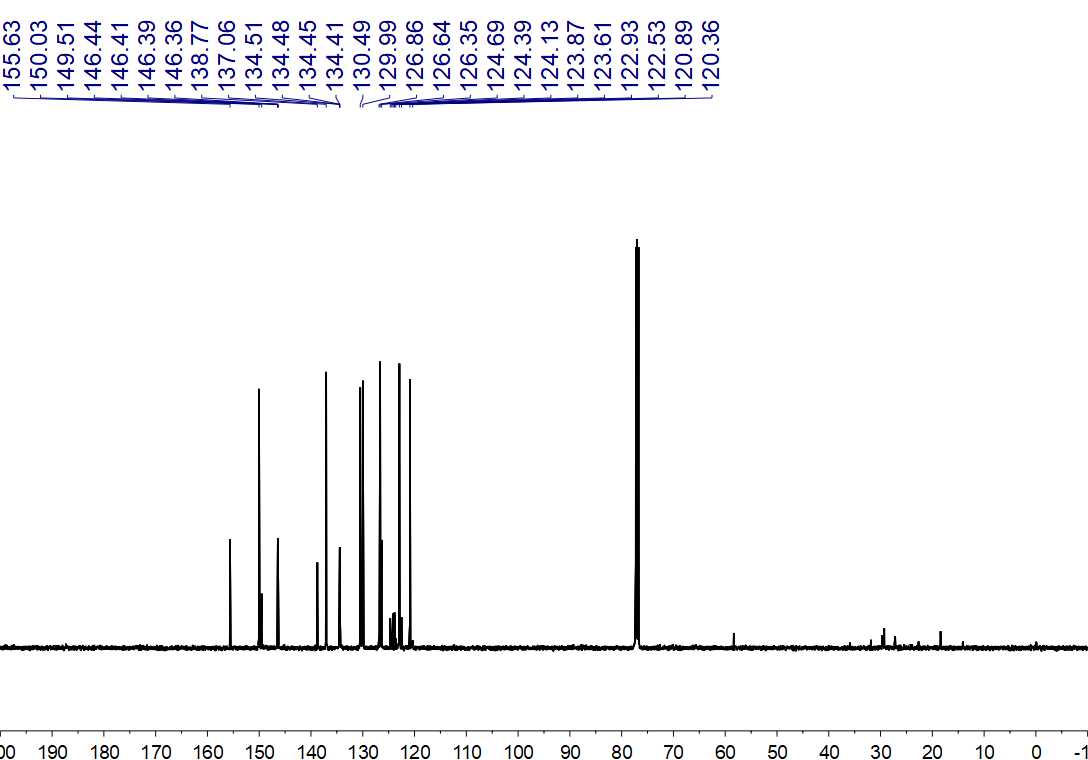


**Fig. S58**. **13C NMR** (125 MHz, CDCl3) spectrum of **15**


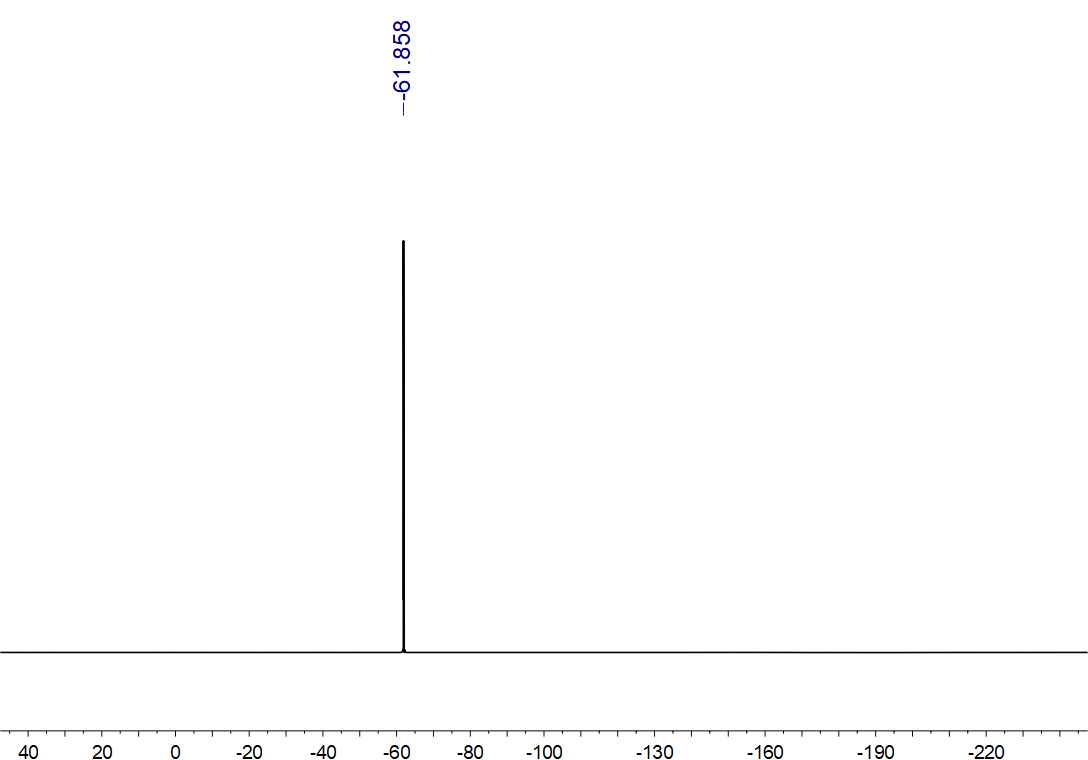


**Fig. S59**. **19F NMR** (470 MHz, CDCl3) spectrum of **15**

**
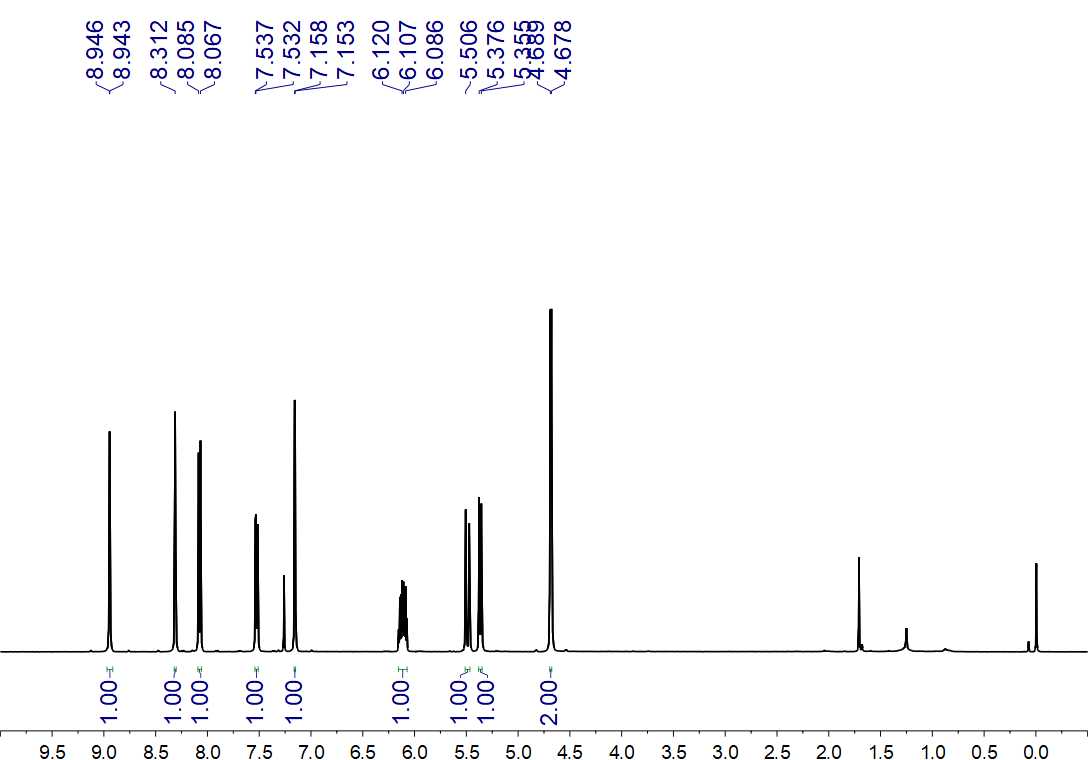
**

**Fig. S60**. **1H NMR** (500 MHz, CDCl3) spectrum of **16**


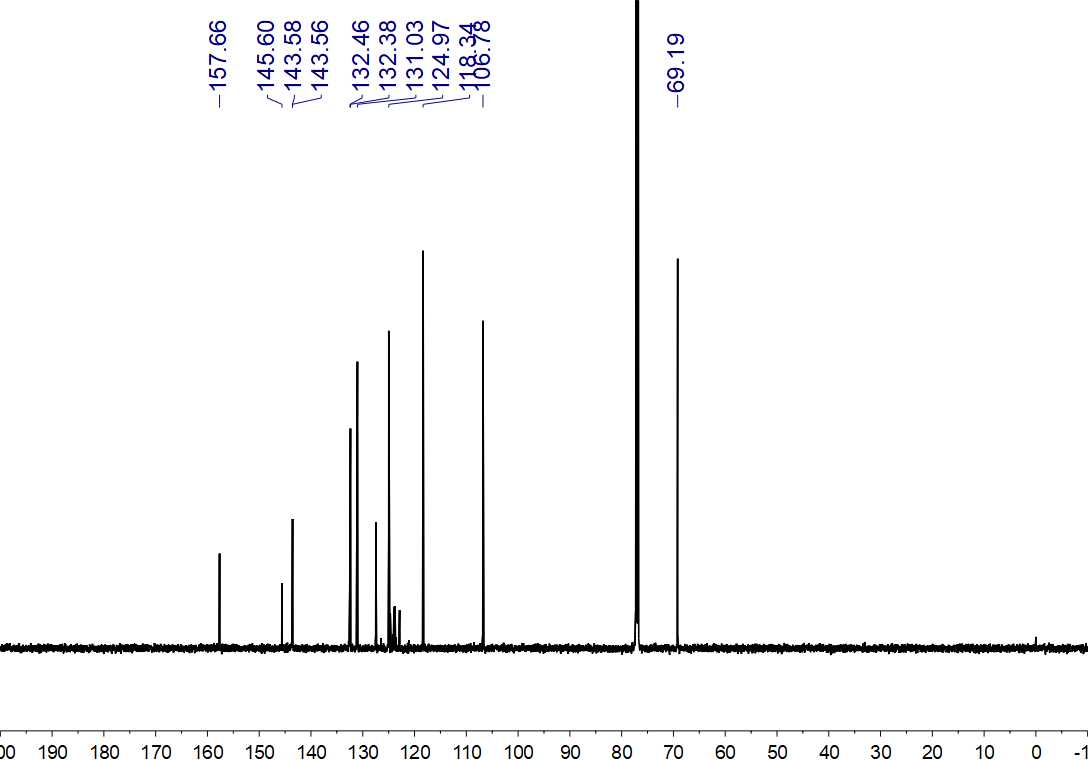


**Fig. S61**. **13C NMR** (150 MHz, CDCl3) spectrum of **16**


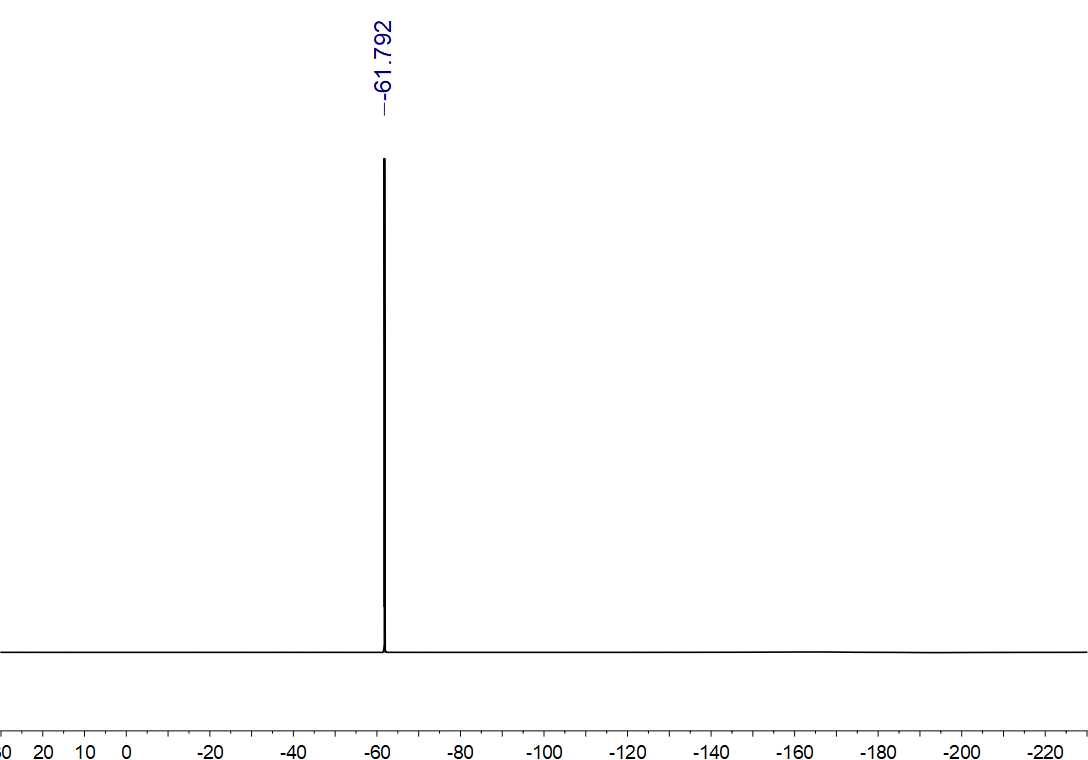


**Fig. S62**. **19F NMR** (564 MHz, CDCl3) spectrum of **16**

**
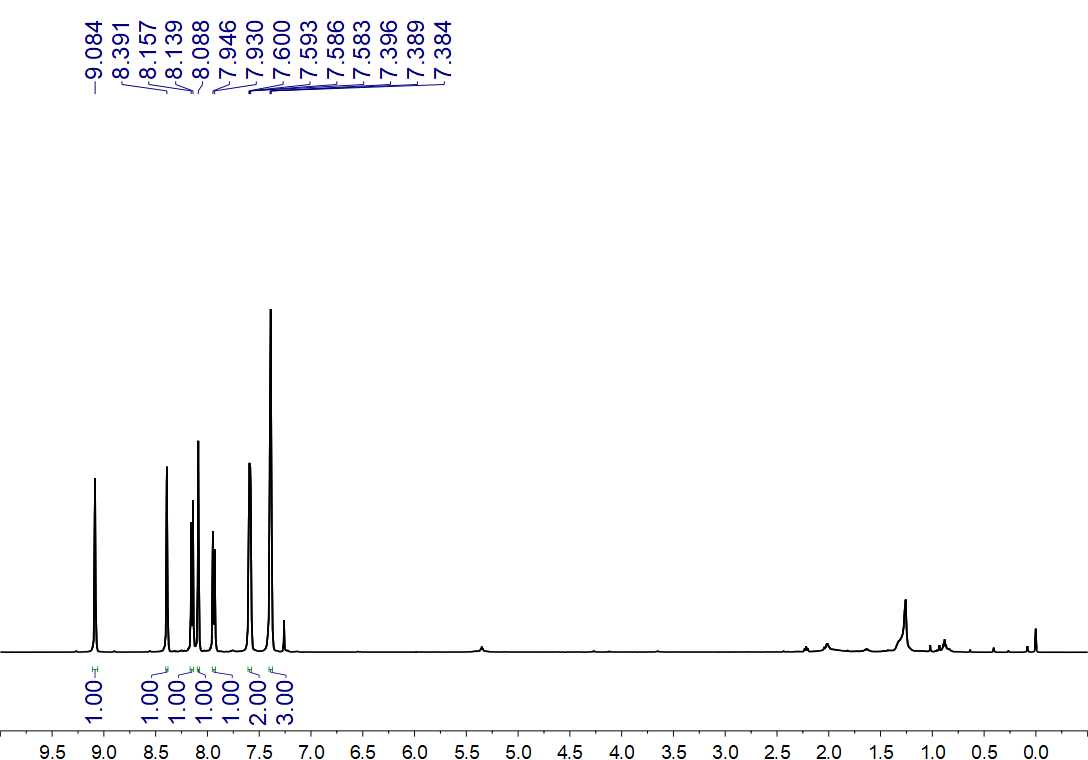
**

**Fig. S63**. **1H NMR** (500 MHz, CDCl3) spectrum of **17**


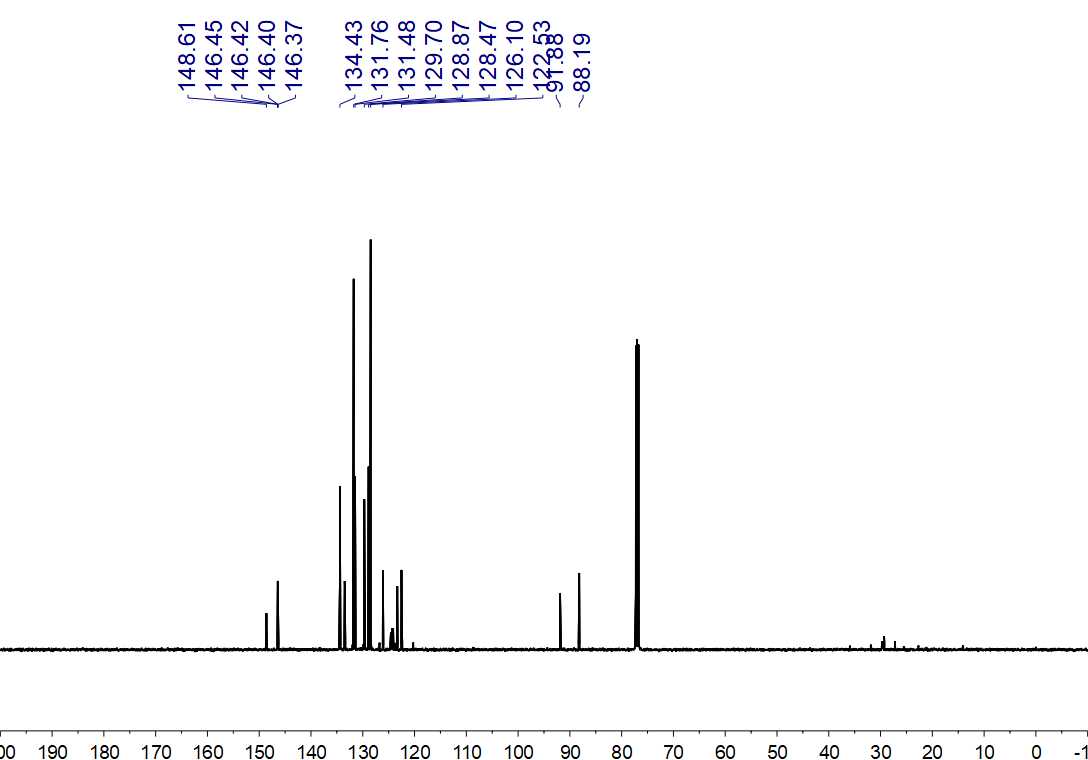


**Fig. S64**. **13C NMR** (125 MHz, CDCl3) spectrum of **17**


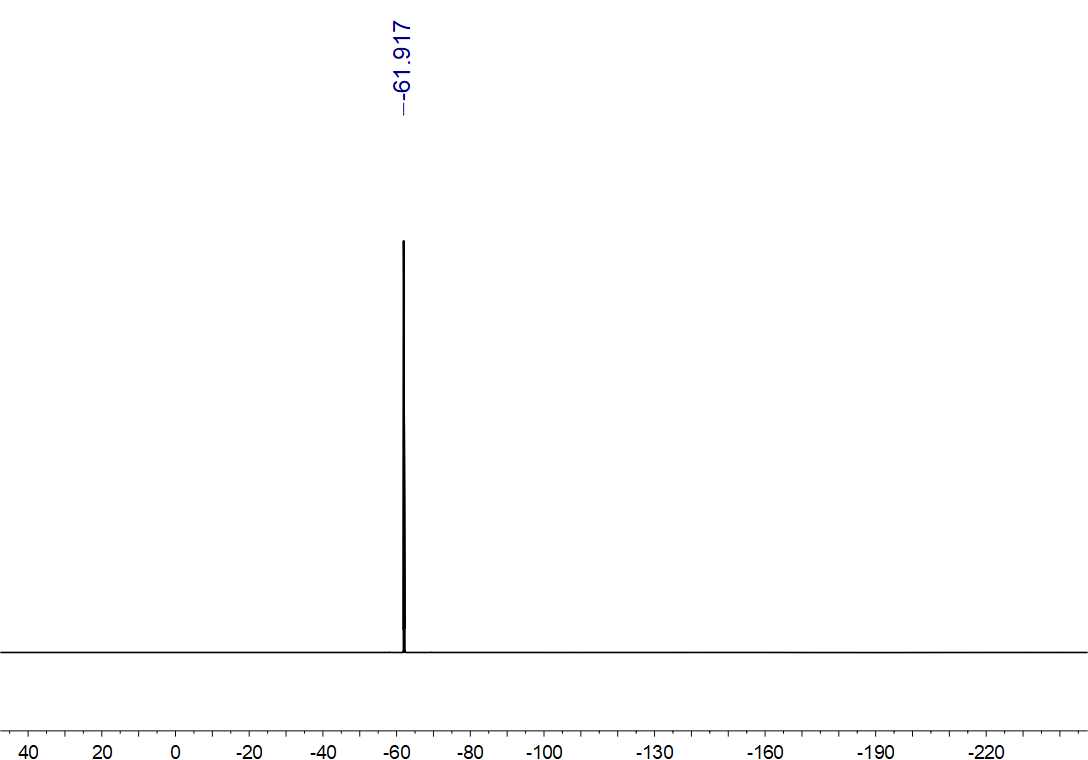


**Fig. S65**. **19F NMR** (470 MHz, CDCl3) spectrum of **17**

**
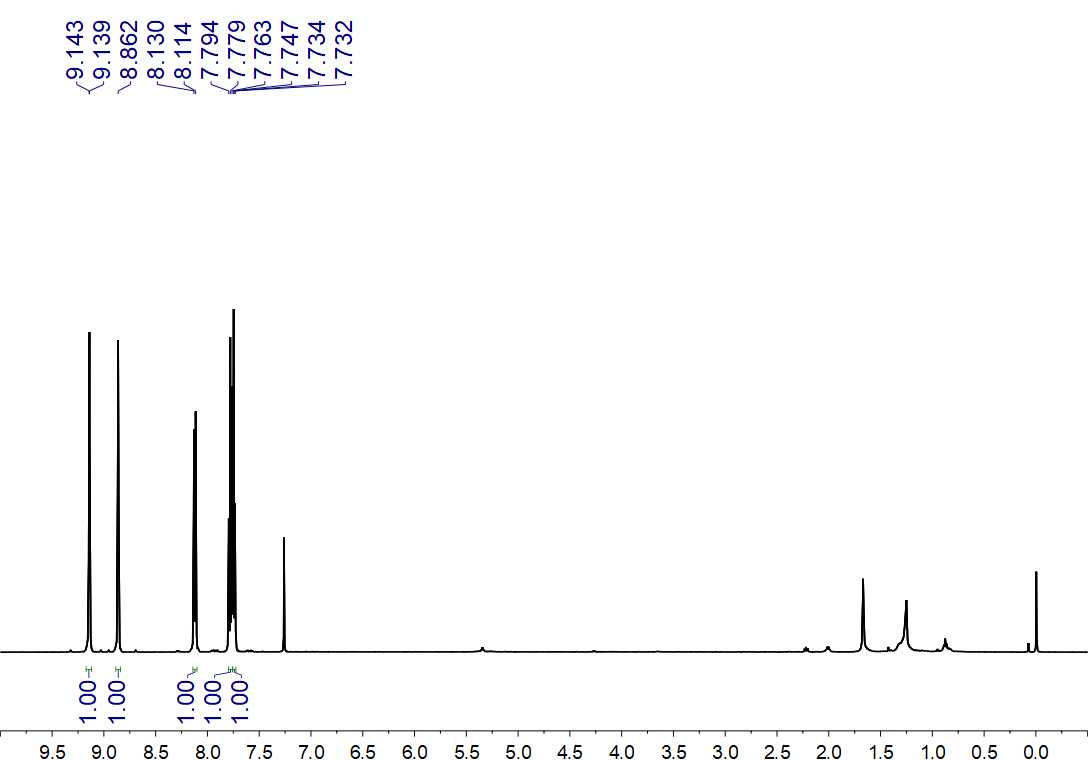
**

**Fig. S66**. **1H NMR** (500 MHz, CDCl3) spectrum of **18**


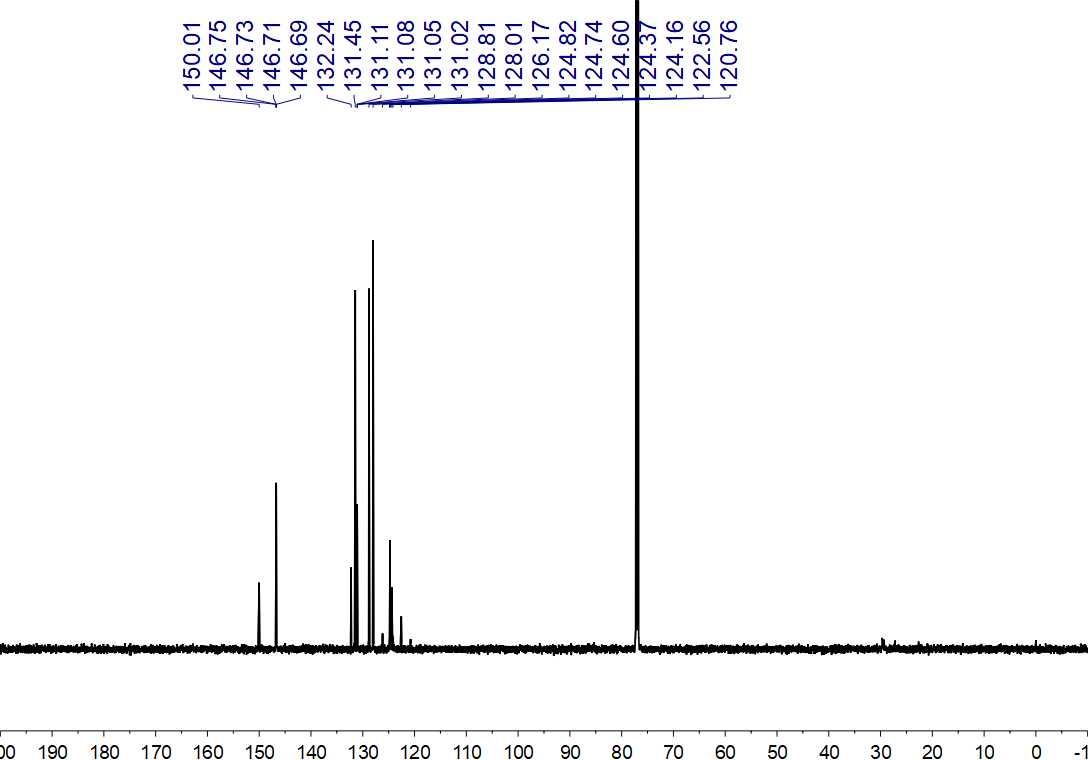


**Fig. S67**. **13C NMR** (150 MHz, CDCl3) spectrum of **18**


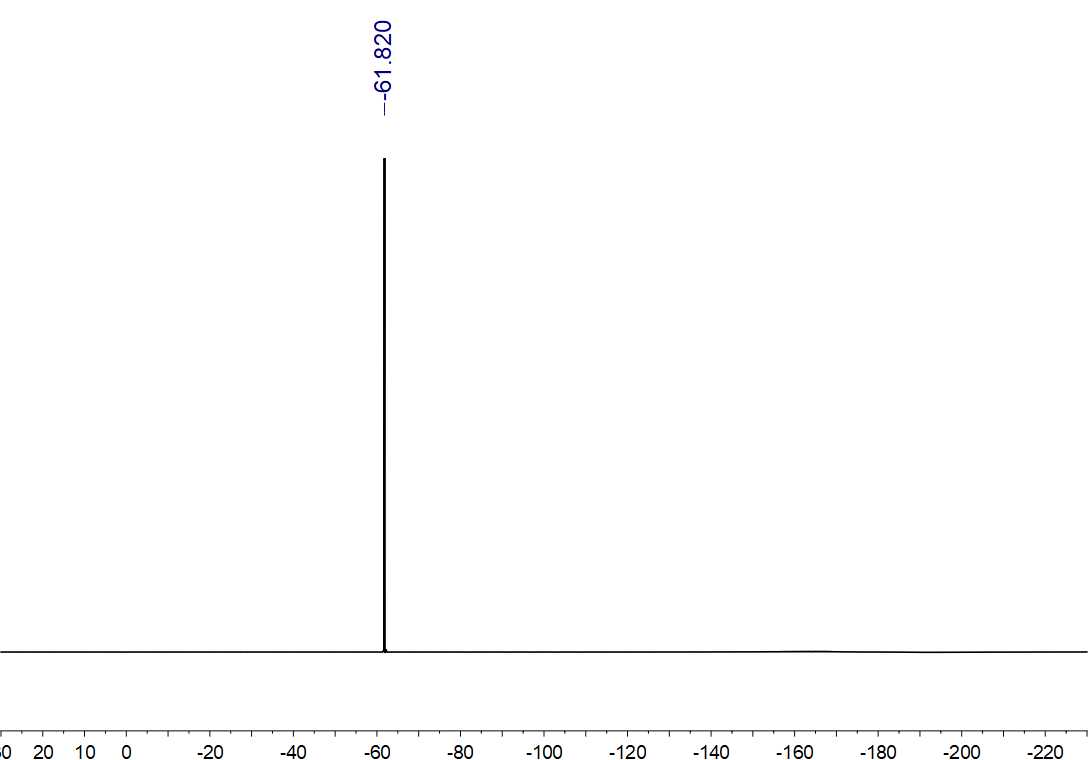


**Fig. S68**. **19F NMR** (564 MHz, CDCl3) spectrum of **18**

**
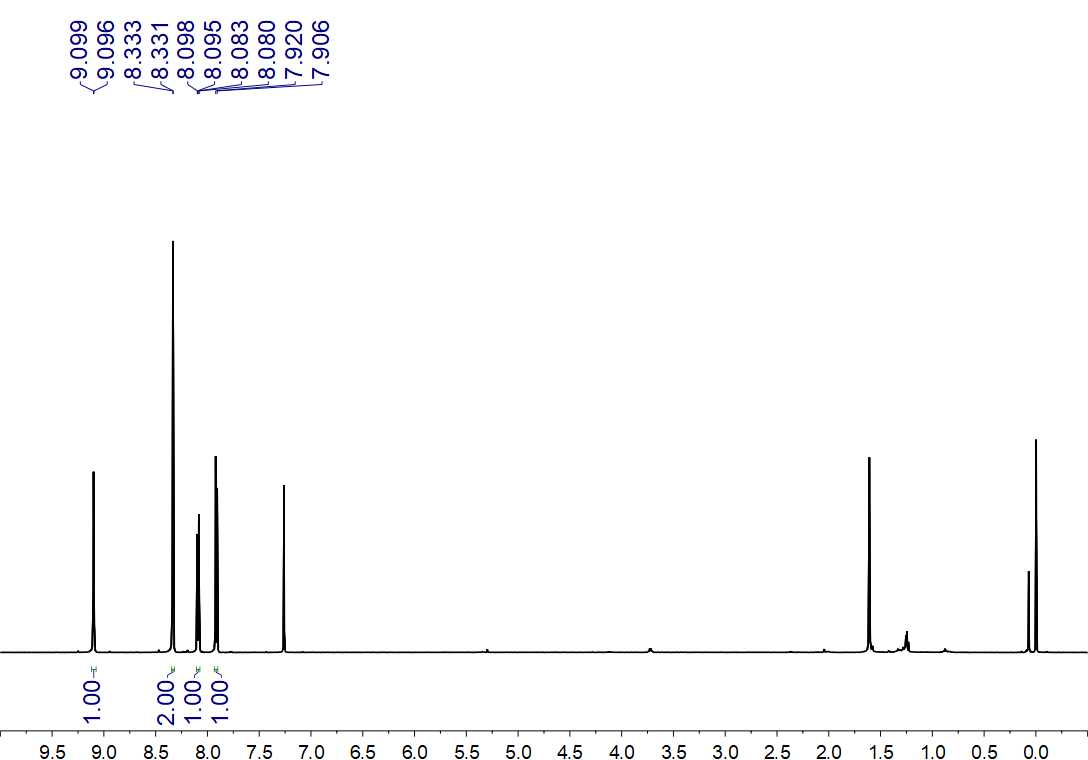
**

**Fig. S69**. **1H NMR** (500 MHz, CDCl3) spectrum of **19**


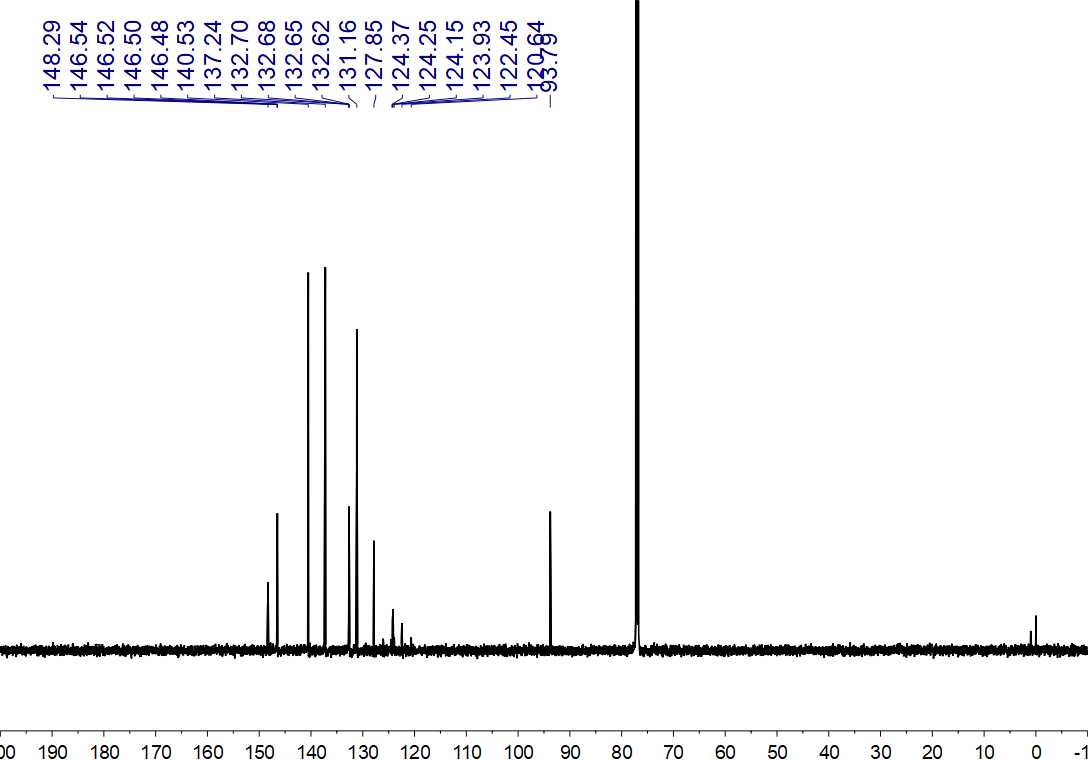


**Fig. S70**. **13C NMR** (150 MHz, CDCl3) spectrum of **19**


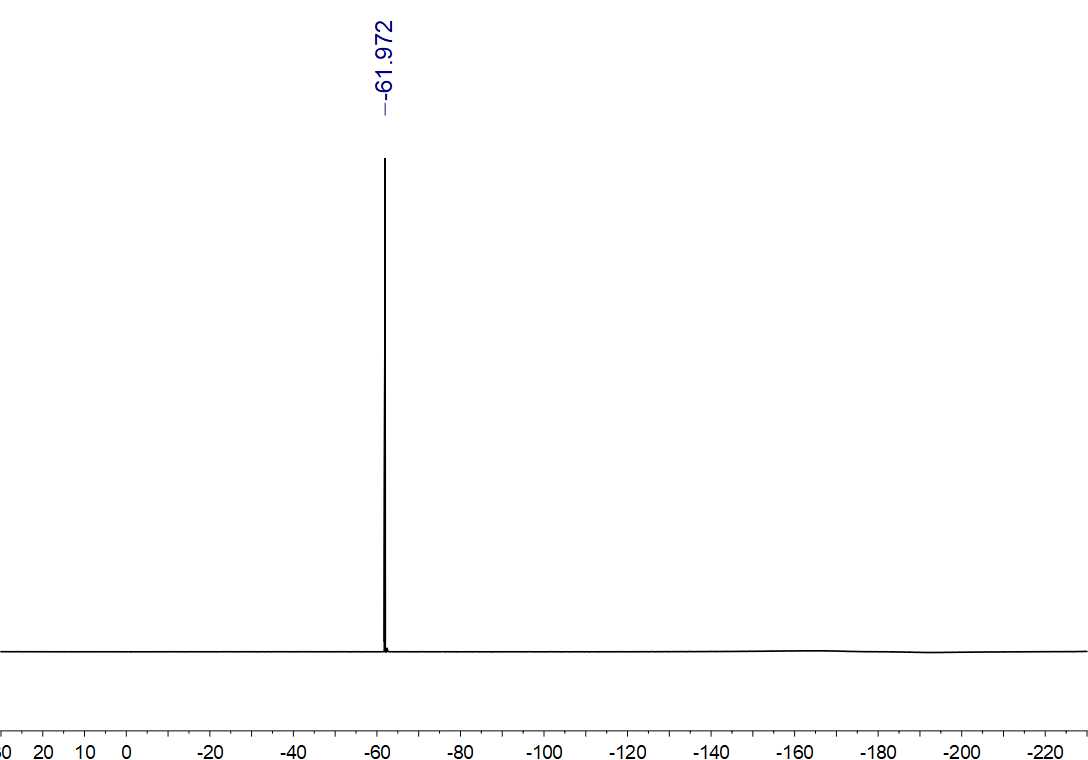


**Fig. S71**. **19F NMR** (564 MHz, CDCl3) spectrum of **19**

**
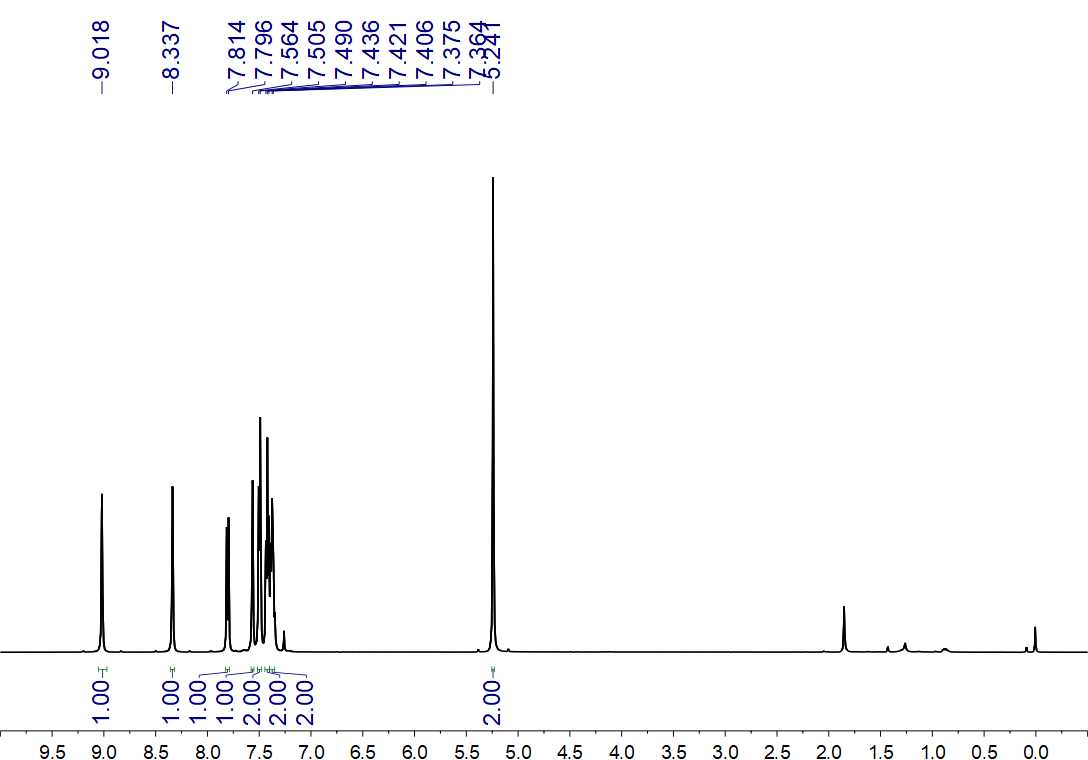
**

**Fig. S72**. **1H NMR** (500 MHz, CDCl3) spectrum of **20**


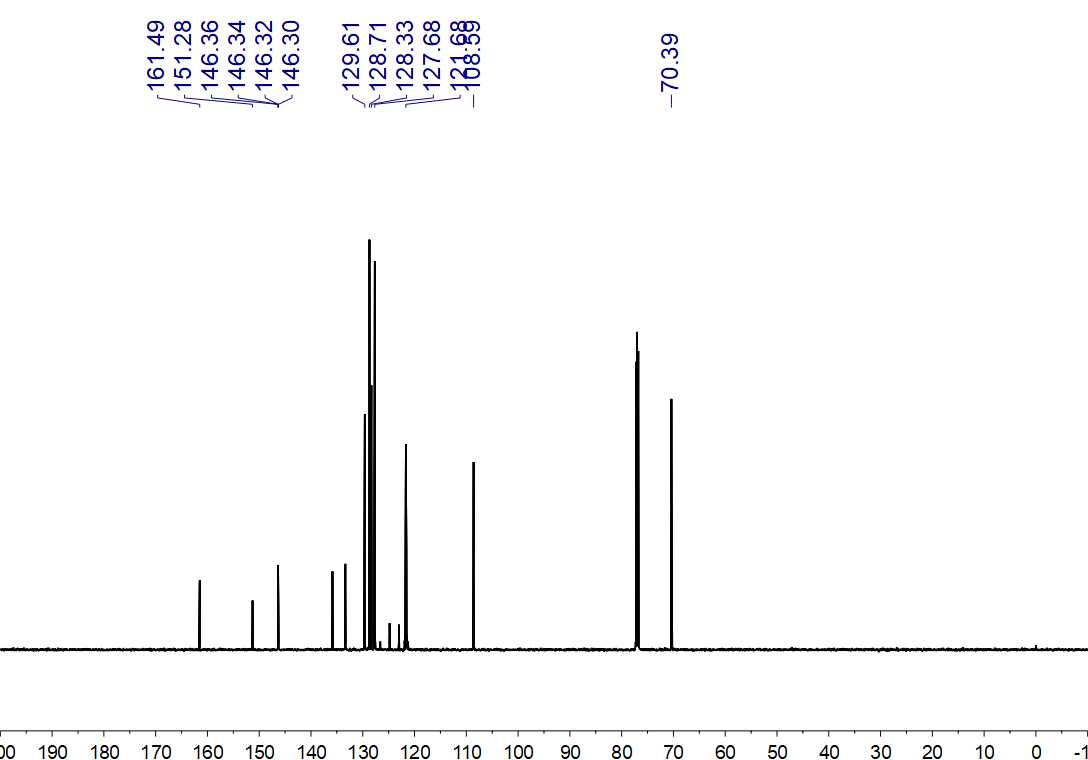


**Fig. S73**. **13C NMR** (150 MHz, CDCl3) spectrum of **20**


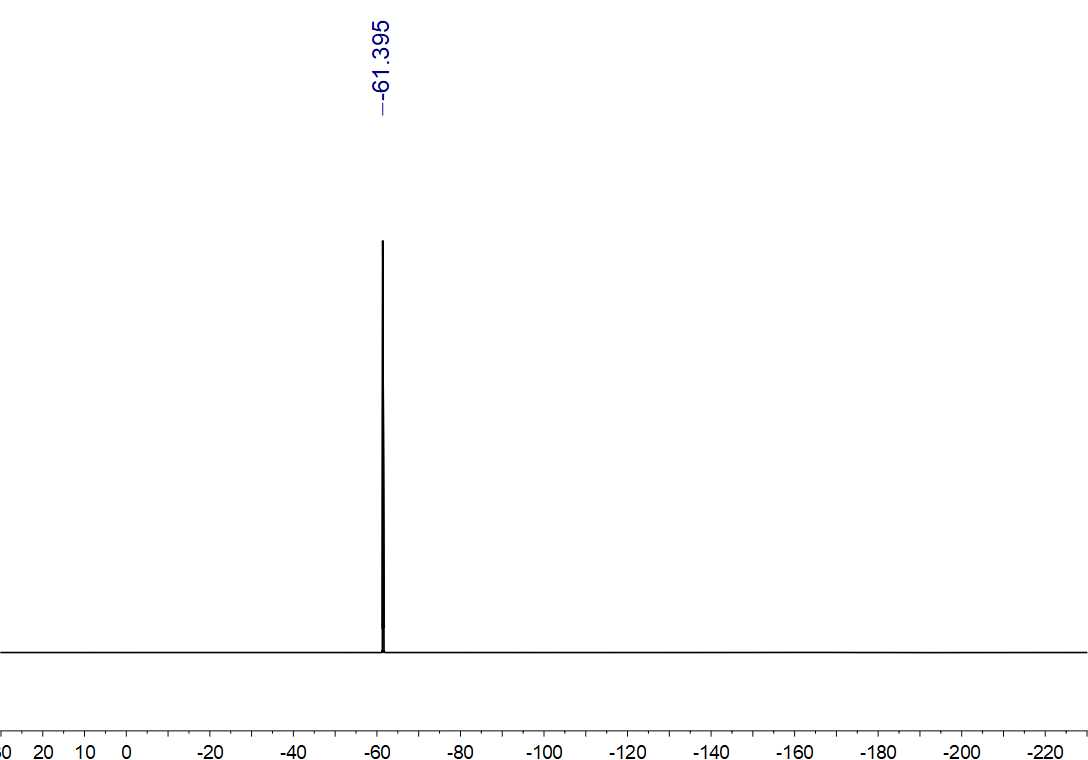


**Fig. S74**. **19F NMR** (564 MHz, CDCl3) spectrum of **20**

**
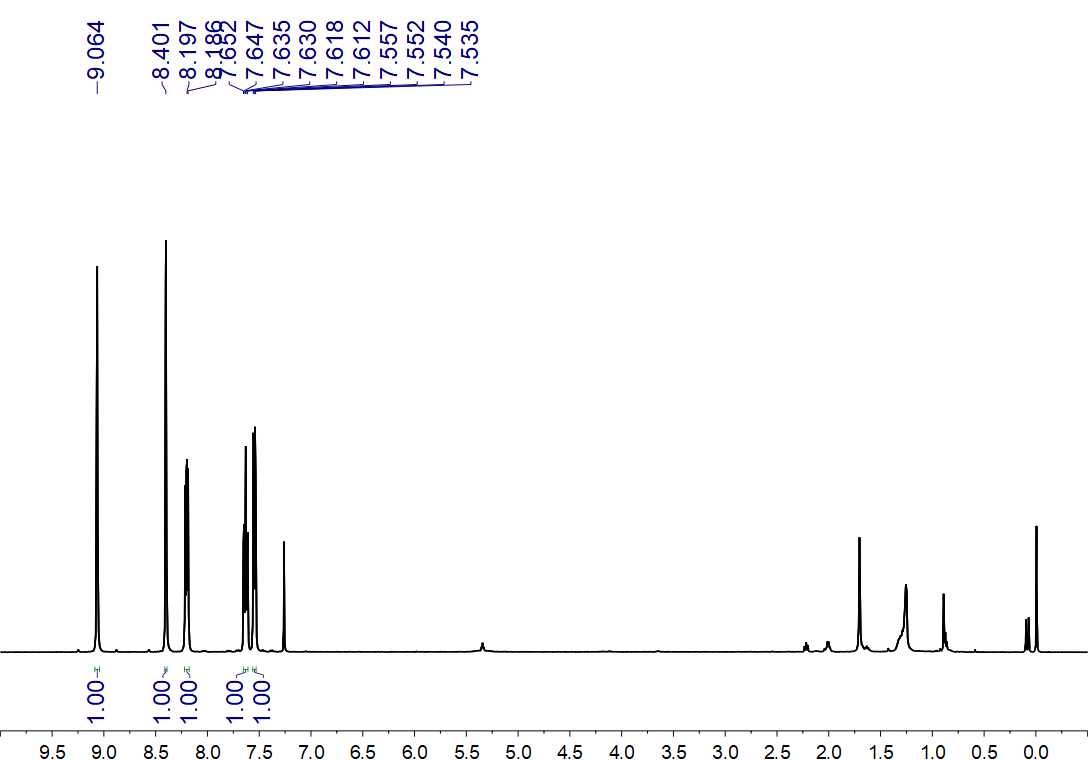
**

**Fig. S75**. **1H NMR** (500 MHz, CDCl3) spectrum of **21**


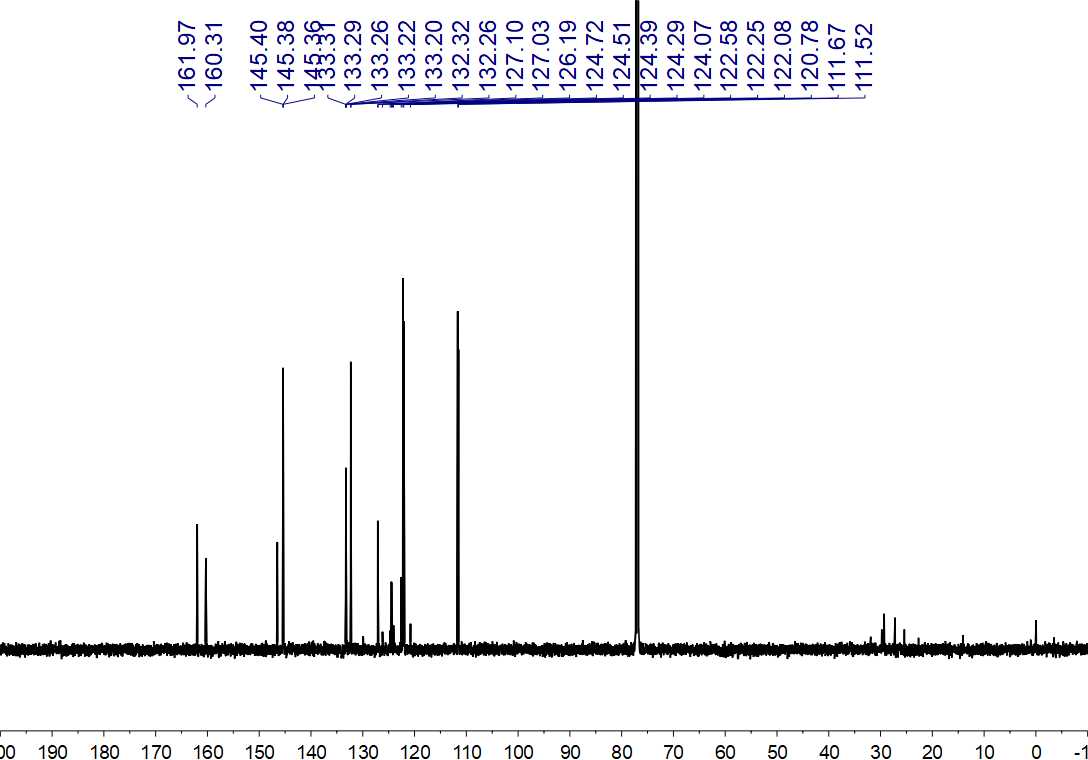


**Fig. S76**. **13C NMR** (150 MHz, CDCl3) spectrum of **21**


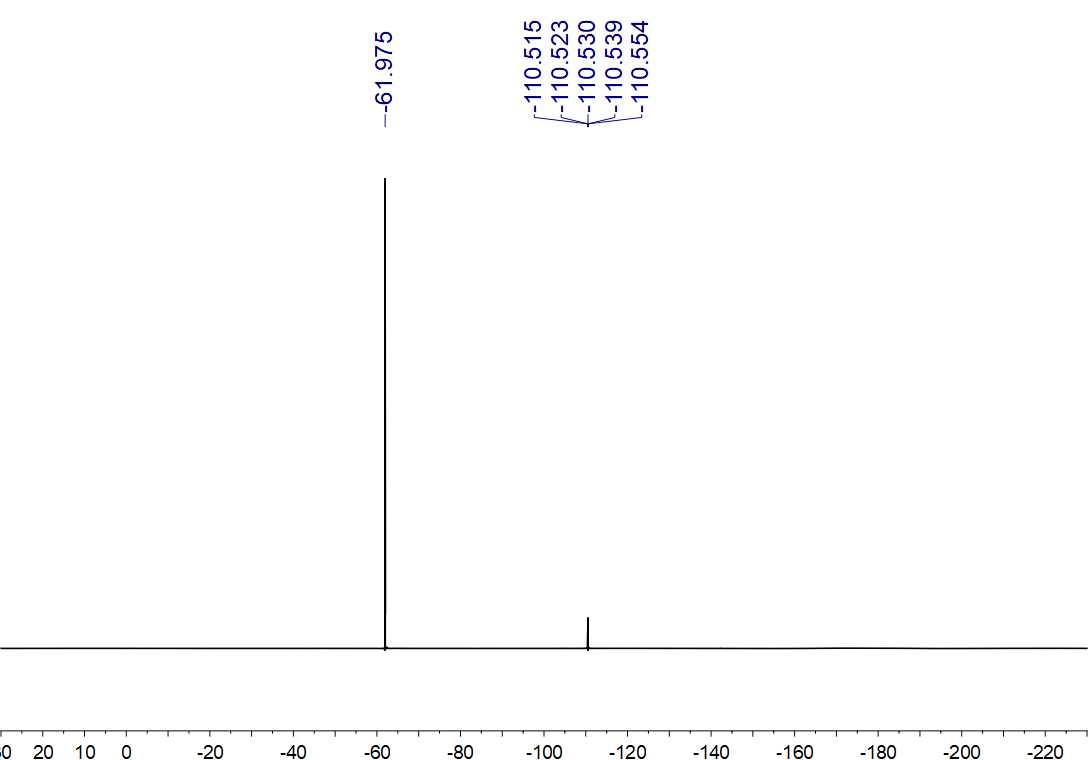


**Fig. S77**. **19F NMR** (564 MHz, CDCl3) spectrum of **21**

**
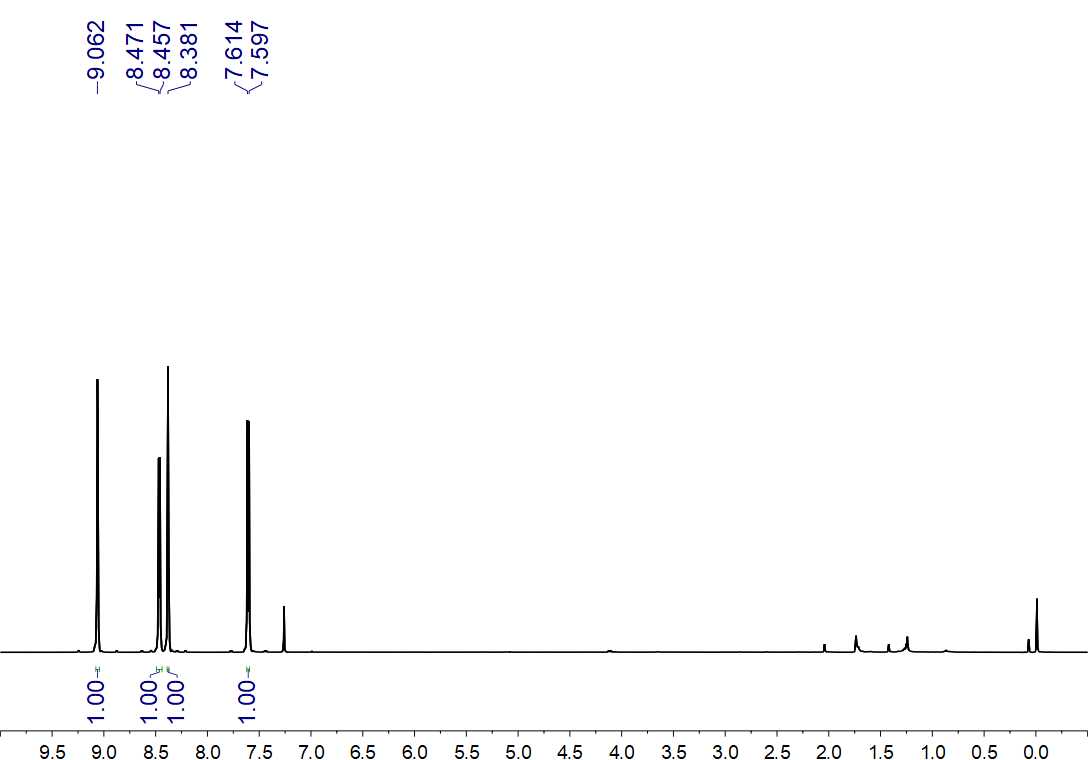
**

**Fig. S78**. **1H NMR** (500 MHz, CDCl3) spectrum of **22**


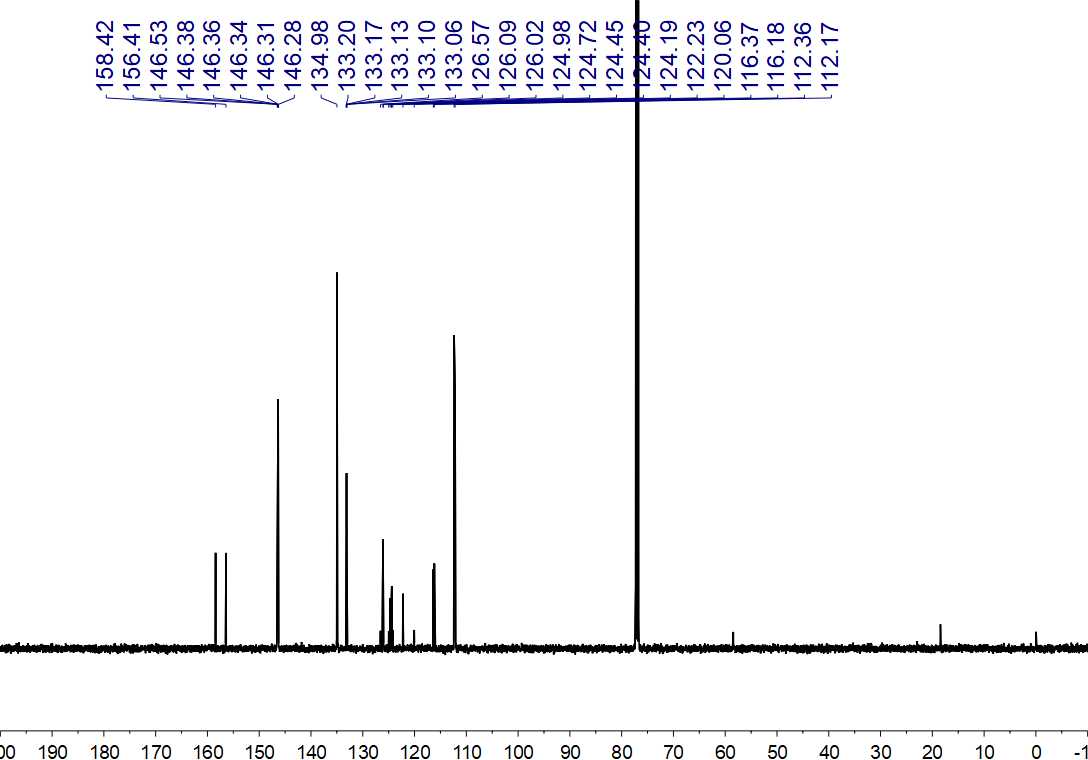


**Fig. S79**. **13C NMR** (125 MHz, CDCl3) spectrum of **22**


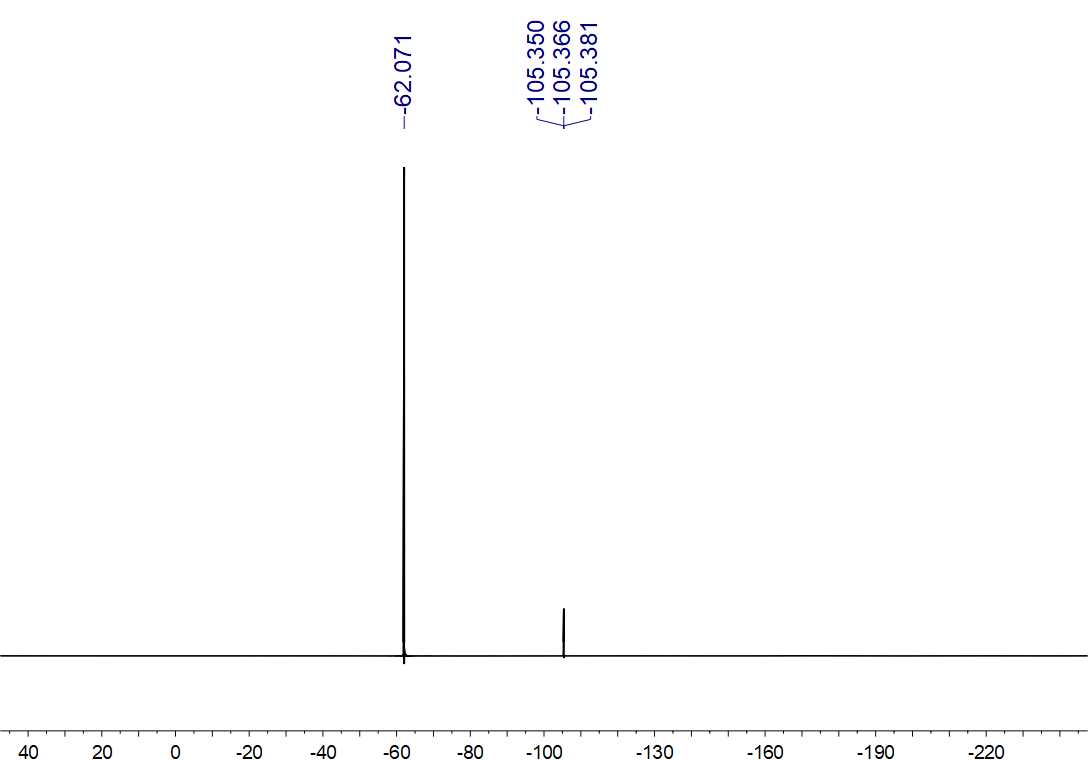


**Fig. S80**. **19F NMR** (470 MHz, CDCl3) spectrum of **22**

**
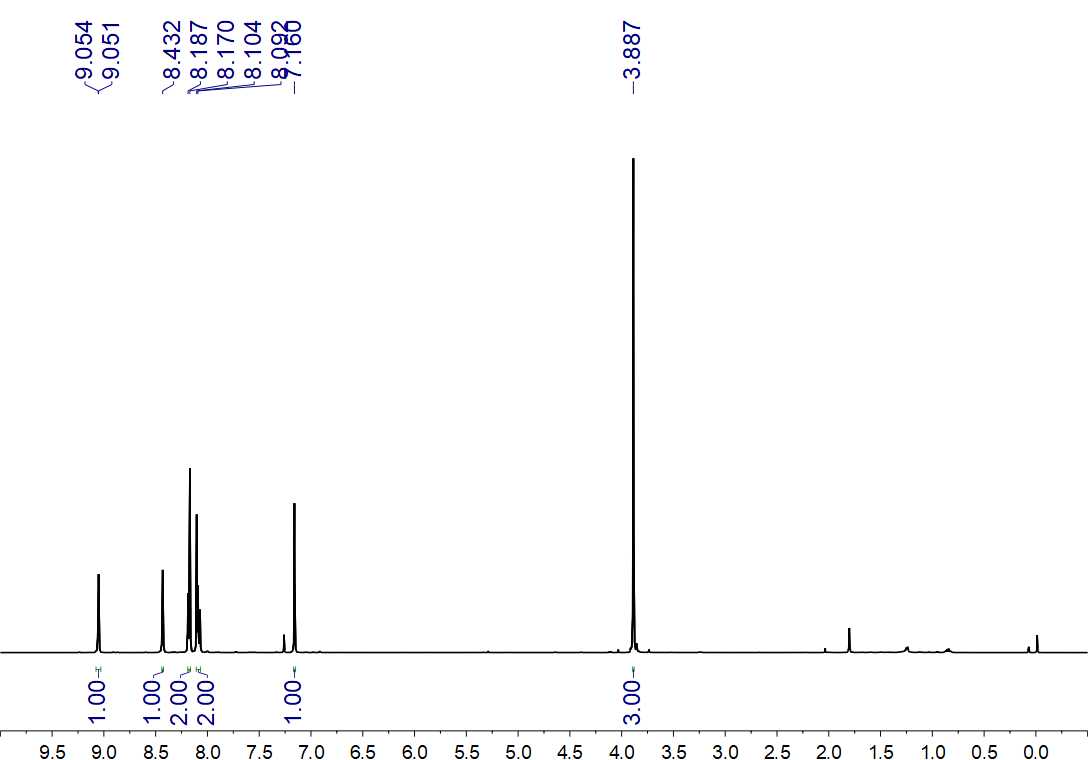
**

**Fig. S81**. **1H NMR** (500 MHz, CDCl3) spectrum of **23**


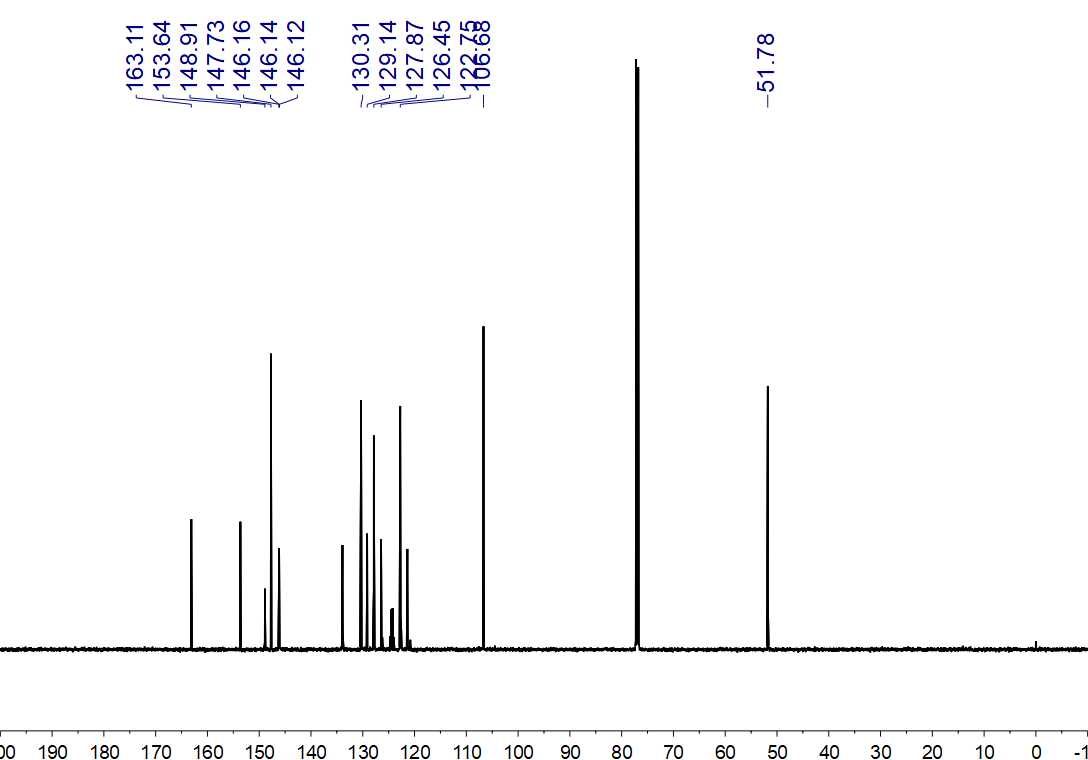


**Fig. S82**. **13C NMR** (150 MHz, CDCl3) spectrum of **23**


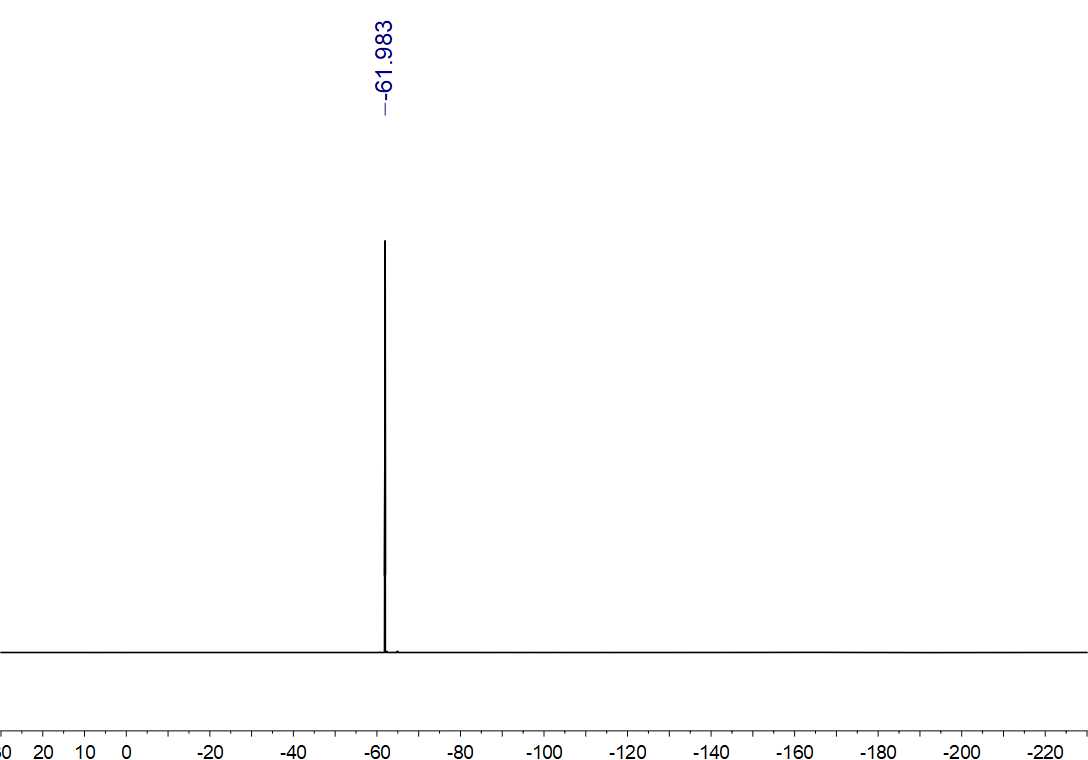


**Fig. S83**. **19F NMR** (564 MHz, CDCl3) spectrum of **23**

**
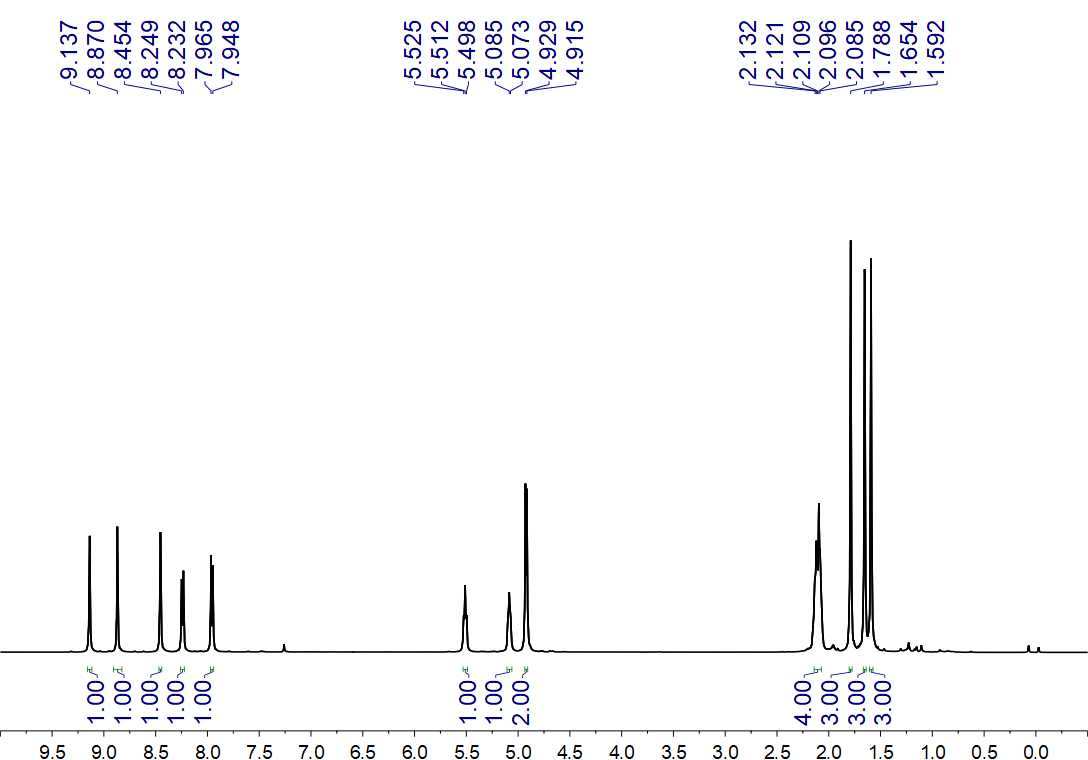
**

**Fig. S84**. **1H NMR** (500 MHz, CDCl3) spectrum of **24**


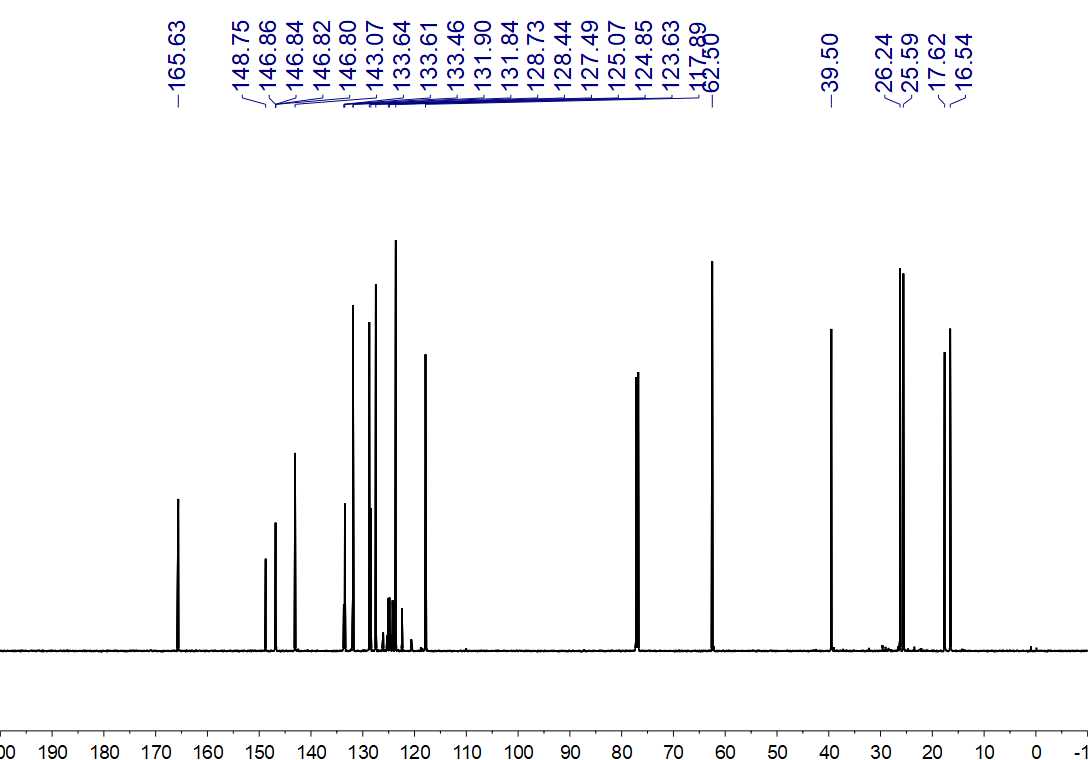


**Fig. S85**. **13C NMR** (150 MHz, CDCl3) spectrum of **24**


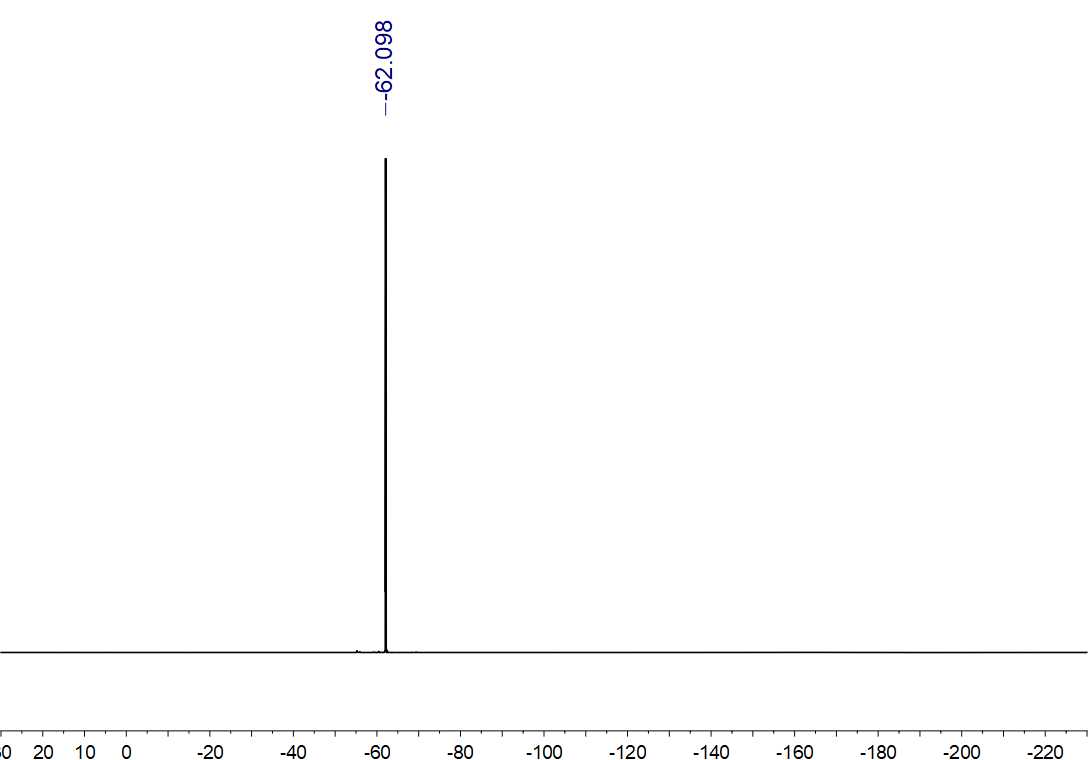


**Fig. S83**. **19F NMR** (564 MHz, CDCl3) spectrum of **24**

**
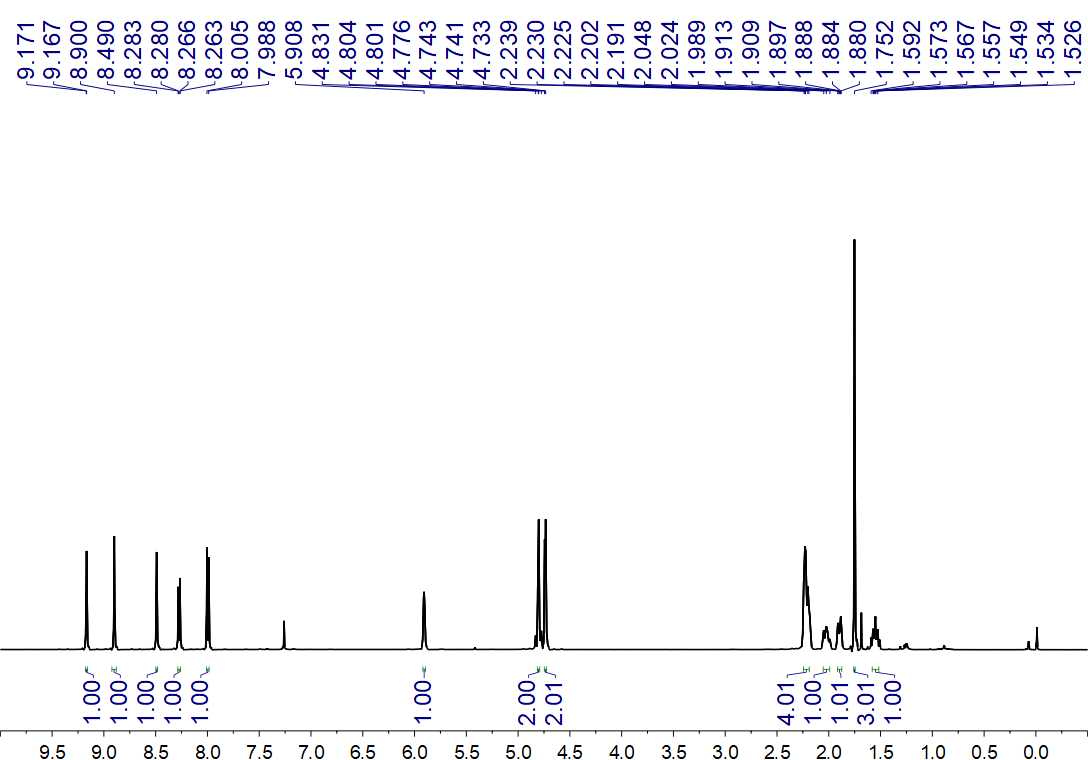
**

**Fig. S87**. **1H NMR** (500 MHz, CDCl3) spectrum of **25**


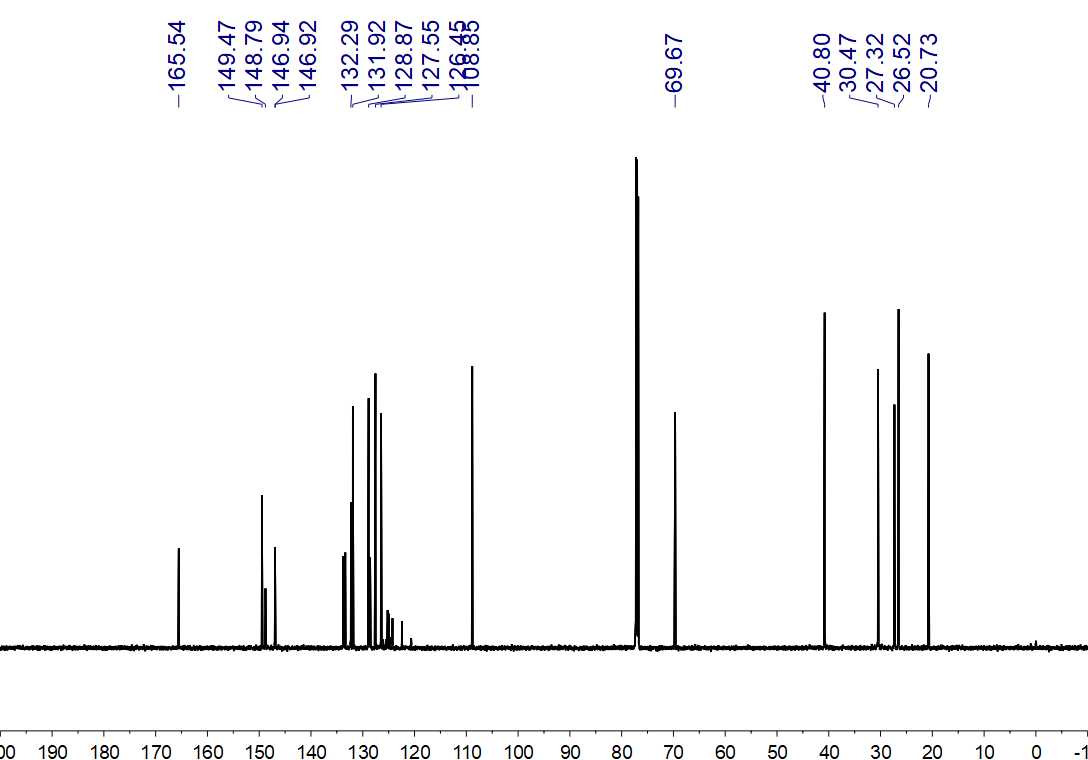


**Fig. S88**. **13C NMR** (150 MHz, CDCl3) spectrum of **25**


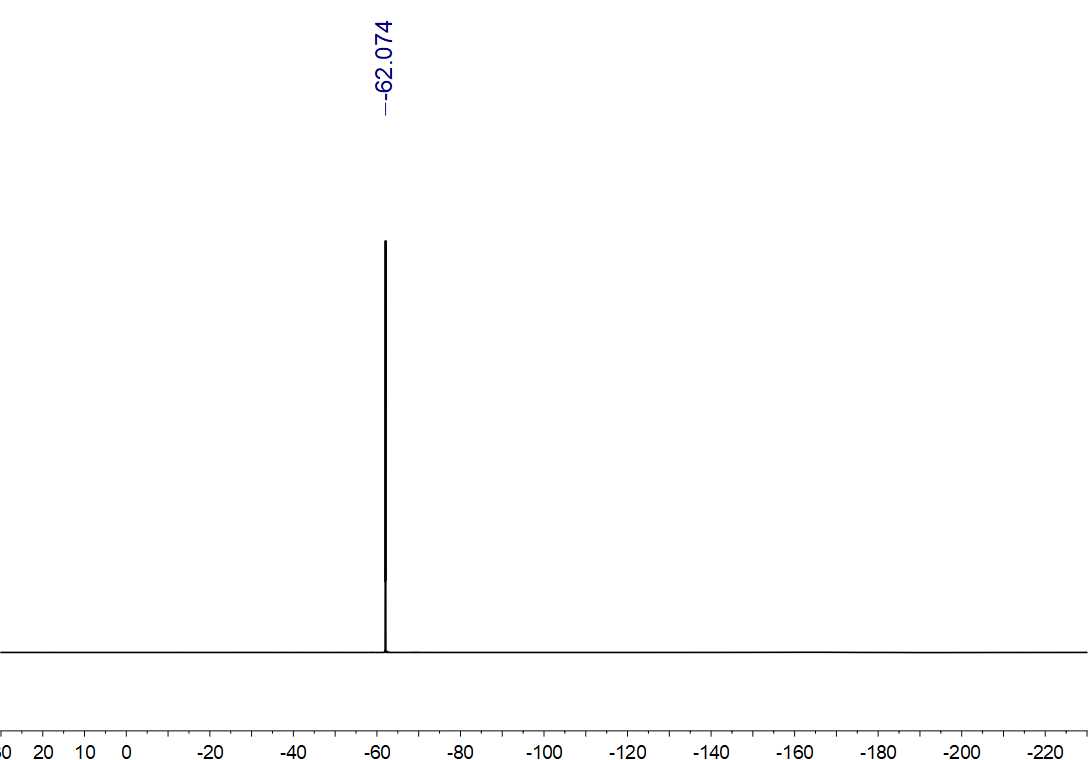


**Fig. S89**. **19F NMR** (564 MHz, CDCl3) spectrum of **25**

**
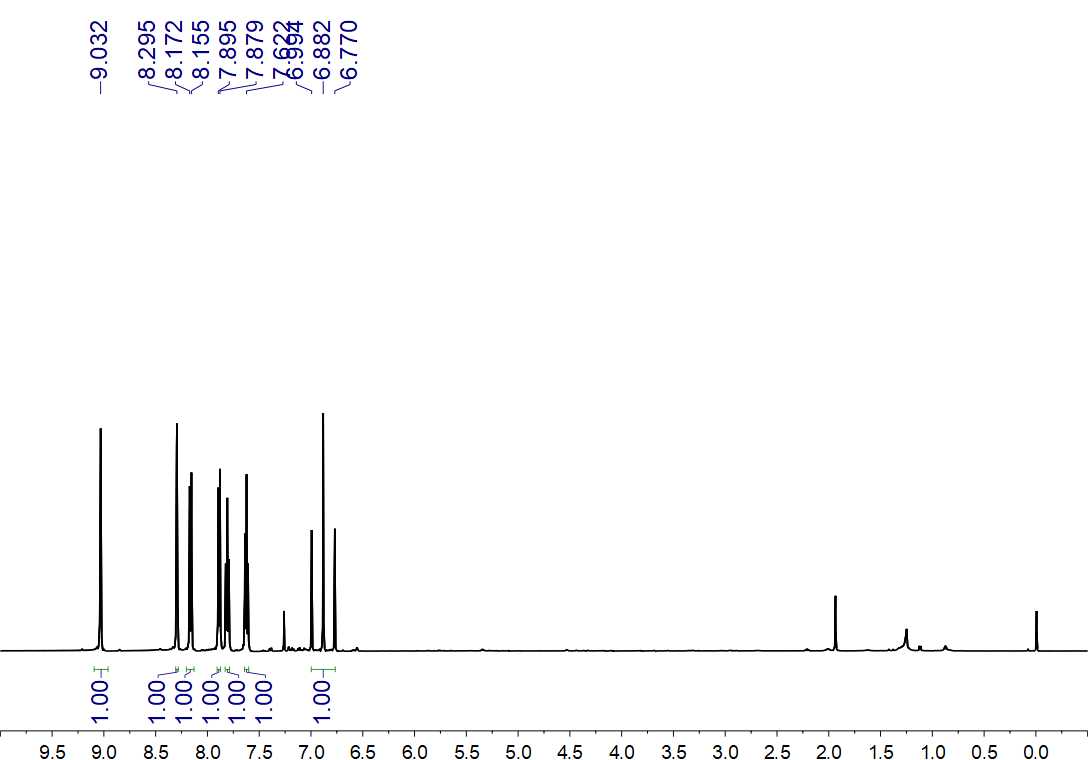
**

**Fig. S90**. **1H NMR** (500 MHz, CDCl3) spectrum of **26**


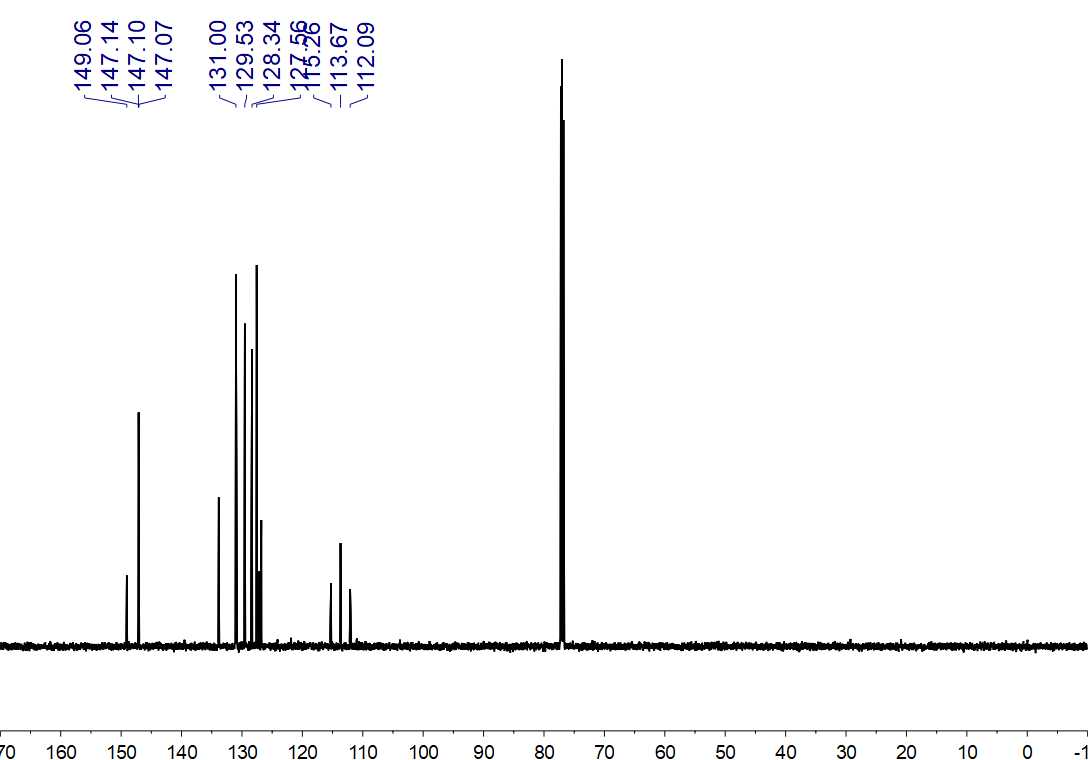


**Fig. S91**. **13C NMR** (150 MHz, CDCl3) spectrum of **26**


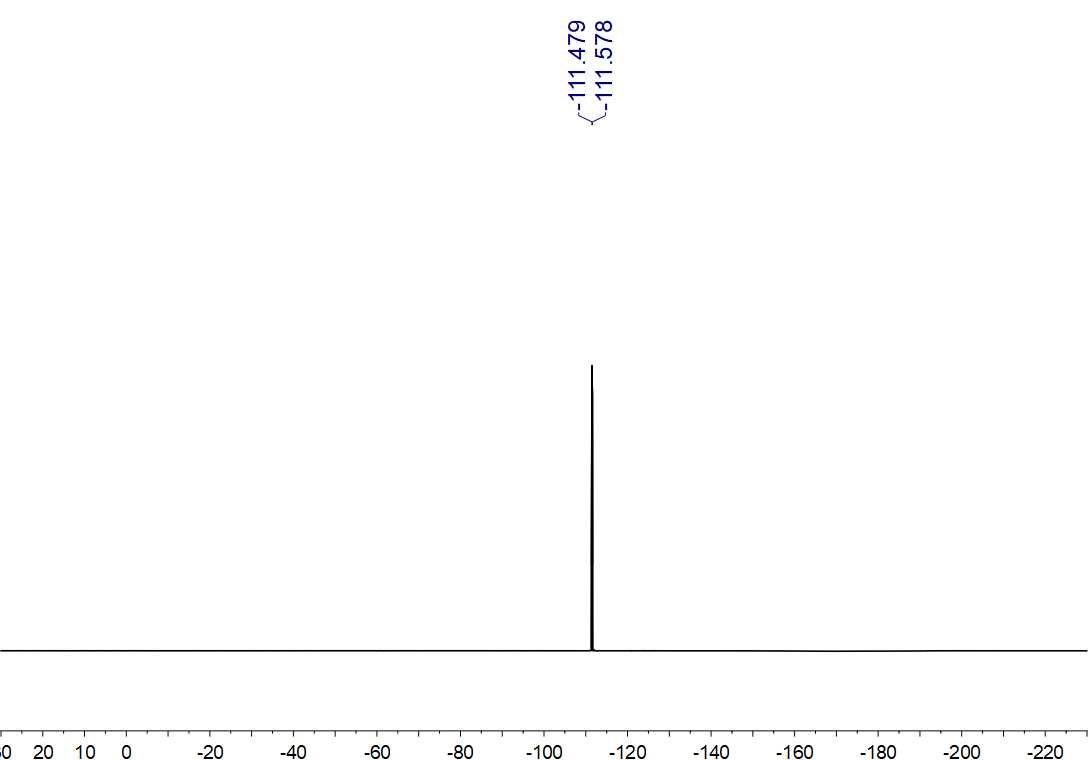


**Fig. S92**. **19F NMR** (564 MHz, CDCl3) spectrum of **26**

**
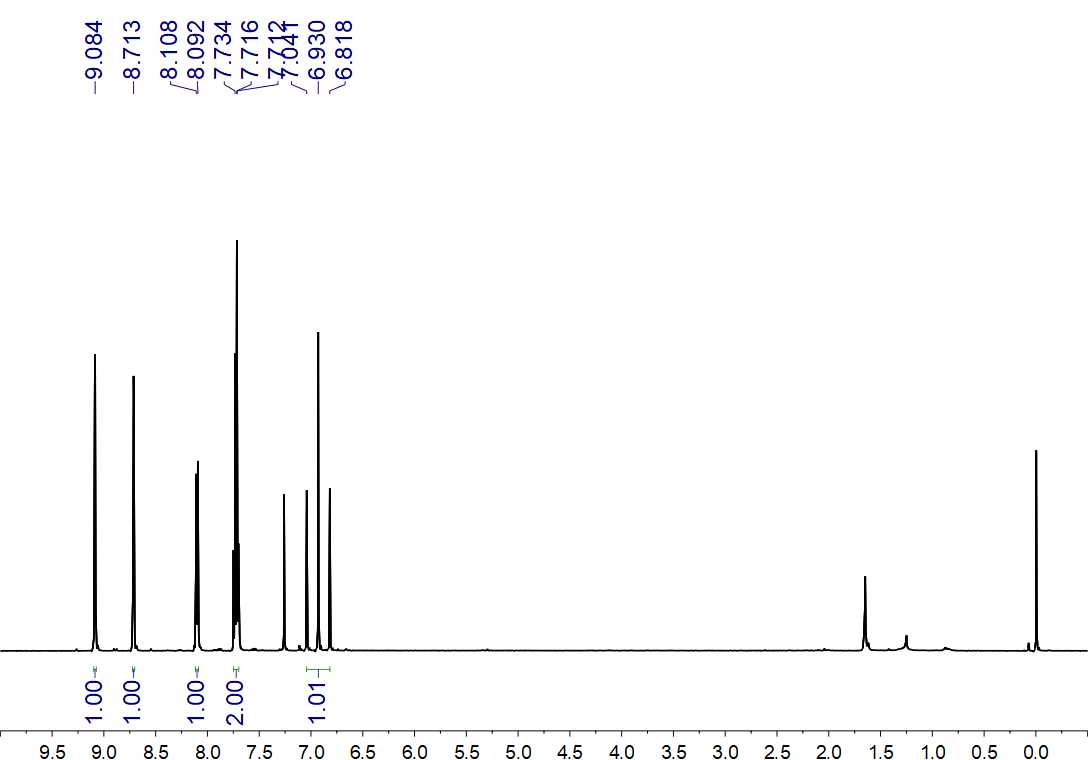
**

**Fig. S93**. **1H NMR** (500 MHz, CDCl3) spectrum of **27**


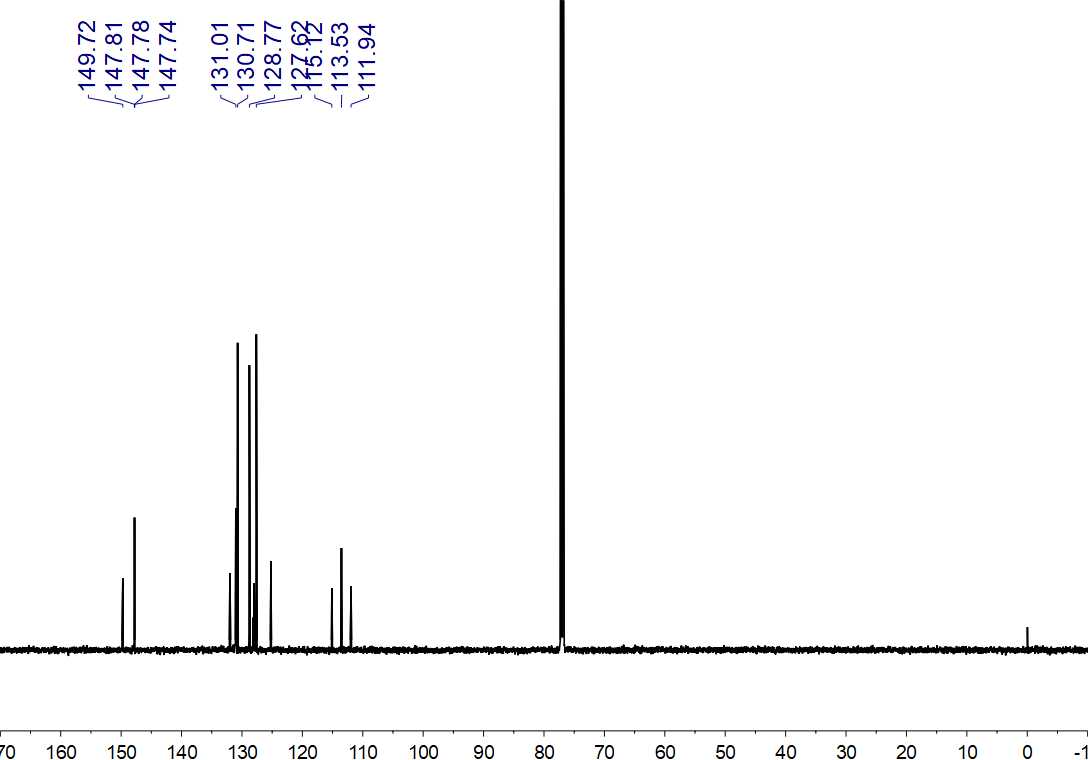


**Fig. S94**. **13C NMR** (150 MHz, CDCl3) spectrum of **27**


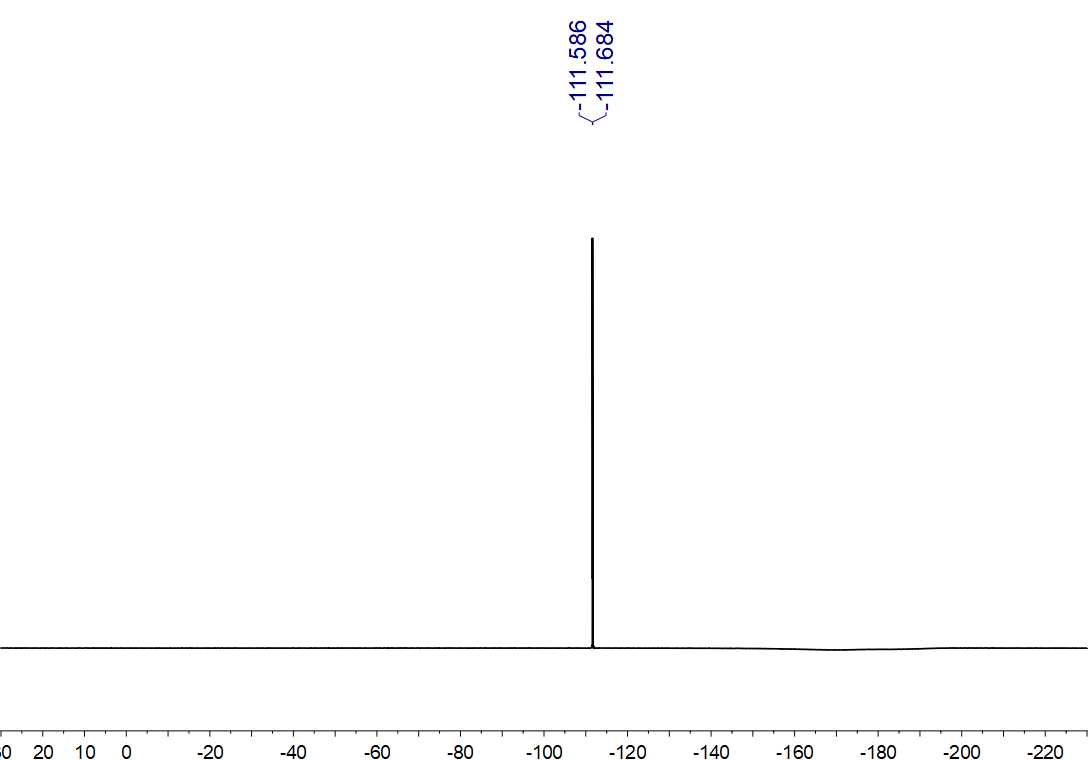


**Fig. S95**. **19F NMR** (564 MHz, CDCl3) spectrum of **27**

**
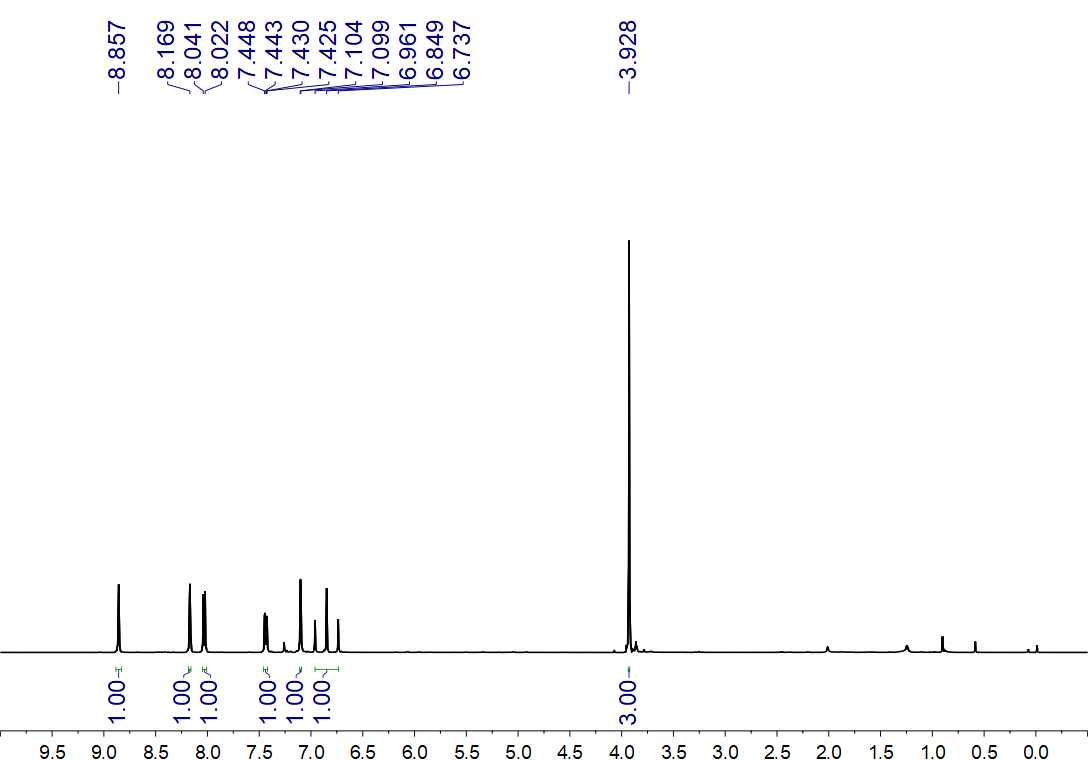
**

**Fig. S96**. **1H NMR** (500 MHz, CDCl3) spectrum of **28**


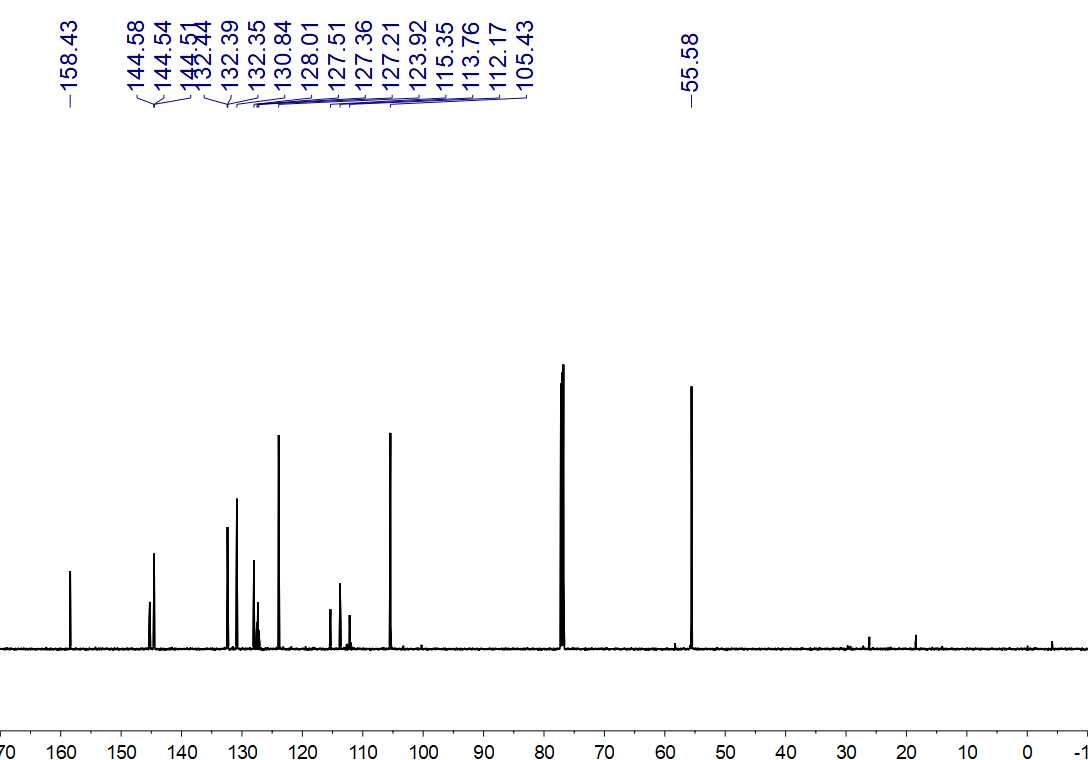


**Fig. S97**. **13C NMR** (150 MHz, CDCl3) spectrum of **28**


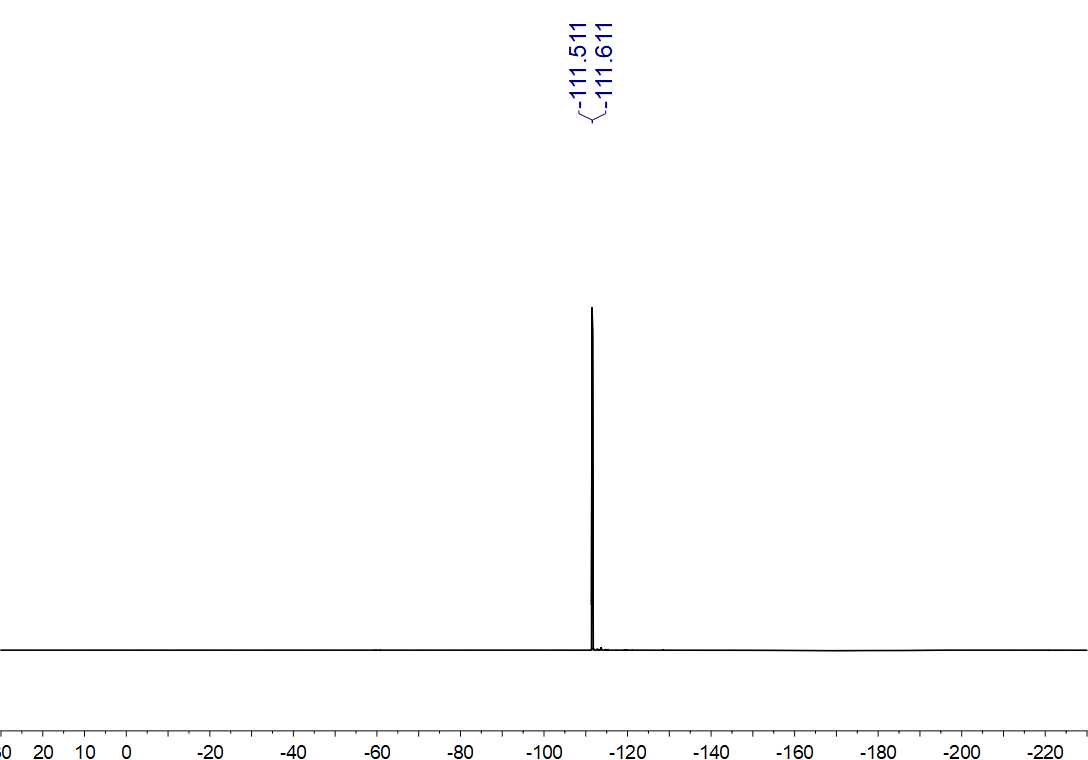


**Fig. S98**. **19F NMR** (564 MHz, CDCl3) spectrum of **28**

**
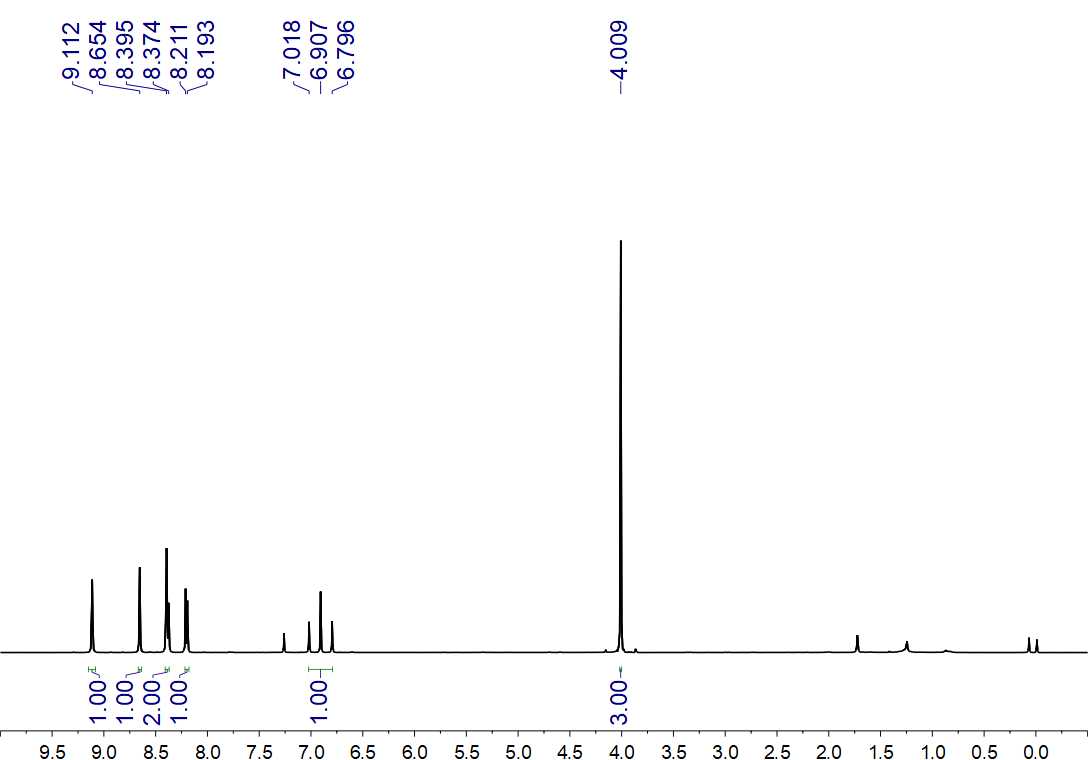
**

**Fig. S99**. **1H NMR** (500 MHz, CDCl3) spectrum of **29**


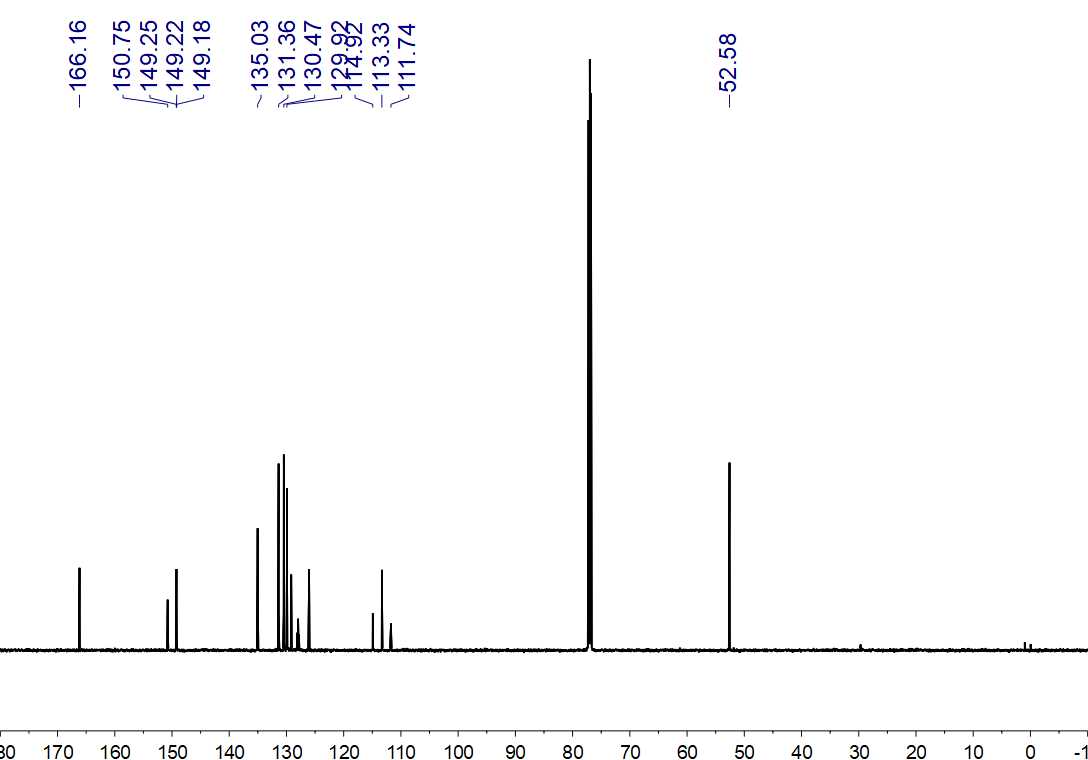


**Fig. S100**. **13C NMR** (150 MHz, CDCl3) spectrum of **29**


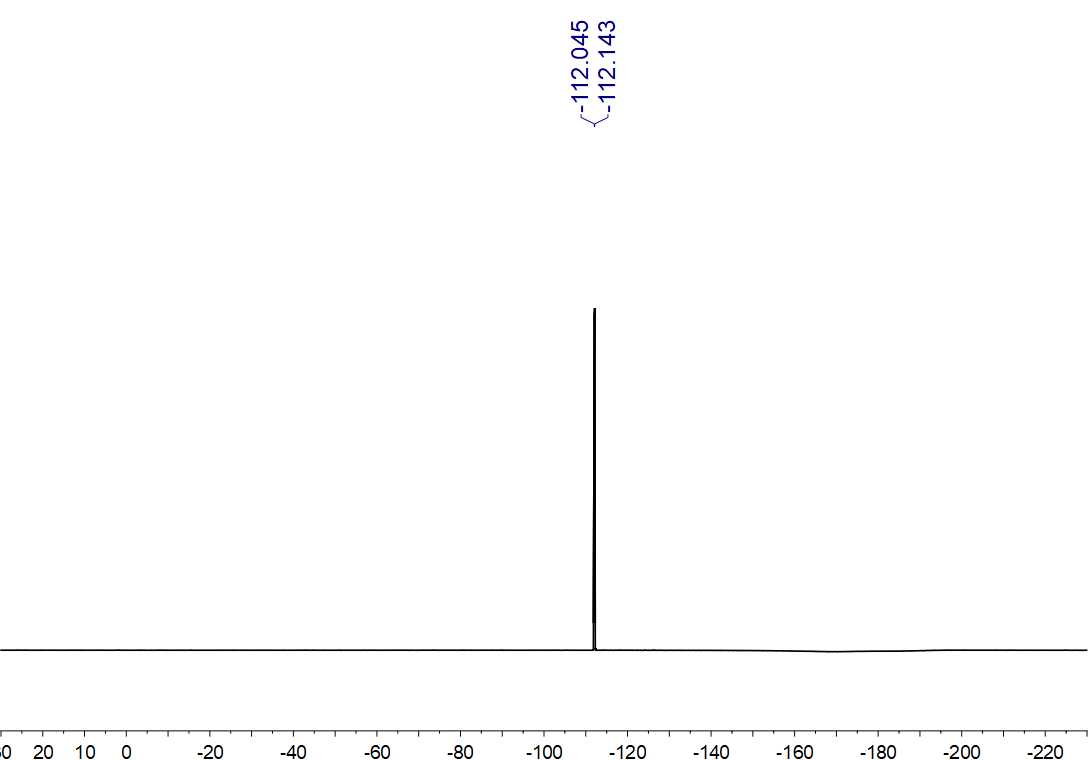


**Fig. S101**. **19F NMR** (564 MHz, CDCl3) spectrum of **29**

**
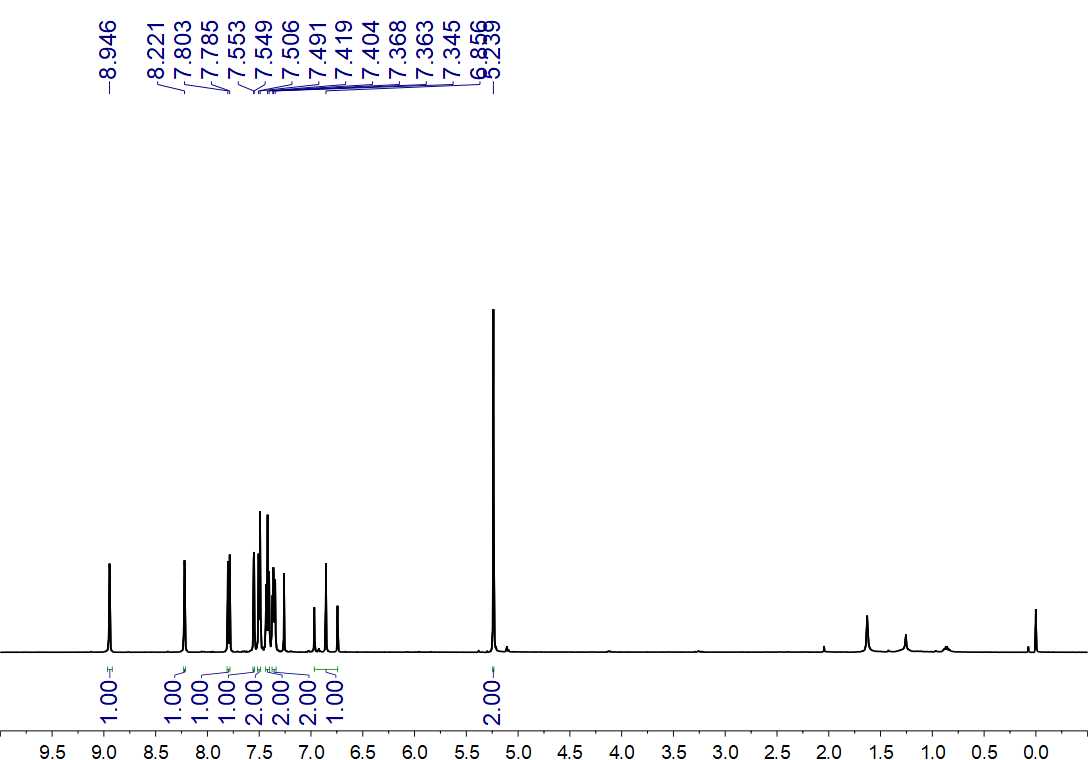
**

**Fig. S102**. **1H NMR** (500 MHz, CDCl3) spectrum of **30**


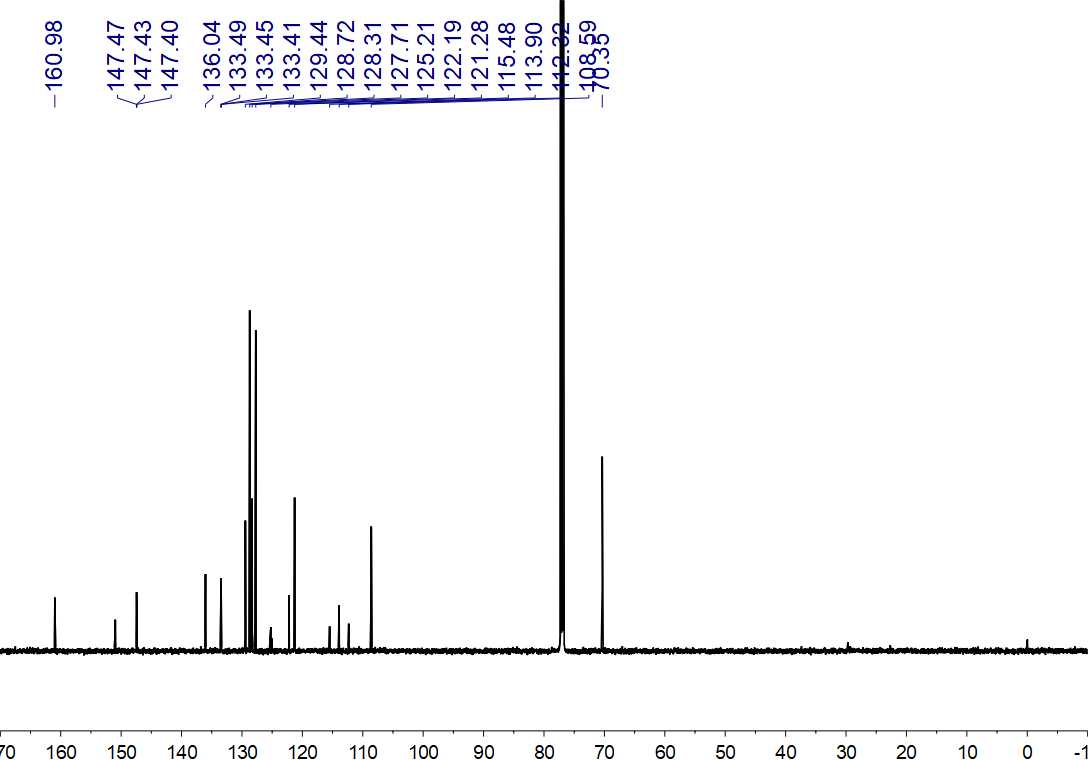


**Fig. S103**. **13C NMR** (150 MHz, CDCl3) spectrum of **30**


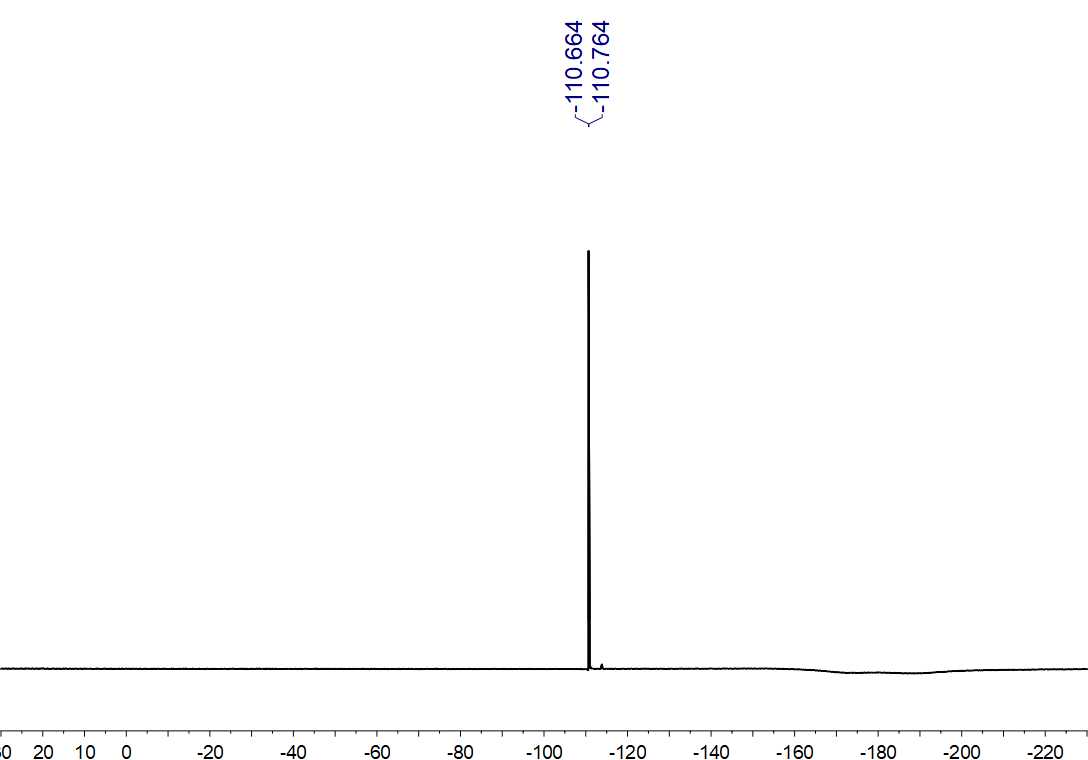


**Fig. S104**. **19F NMR** (564 MHz, CDCl3) spectrum of **30**

**
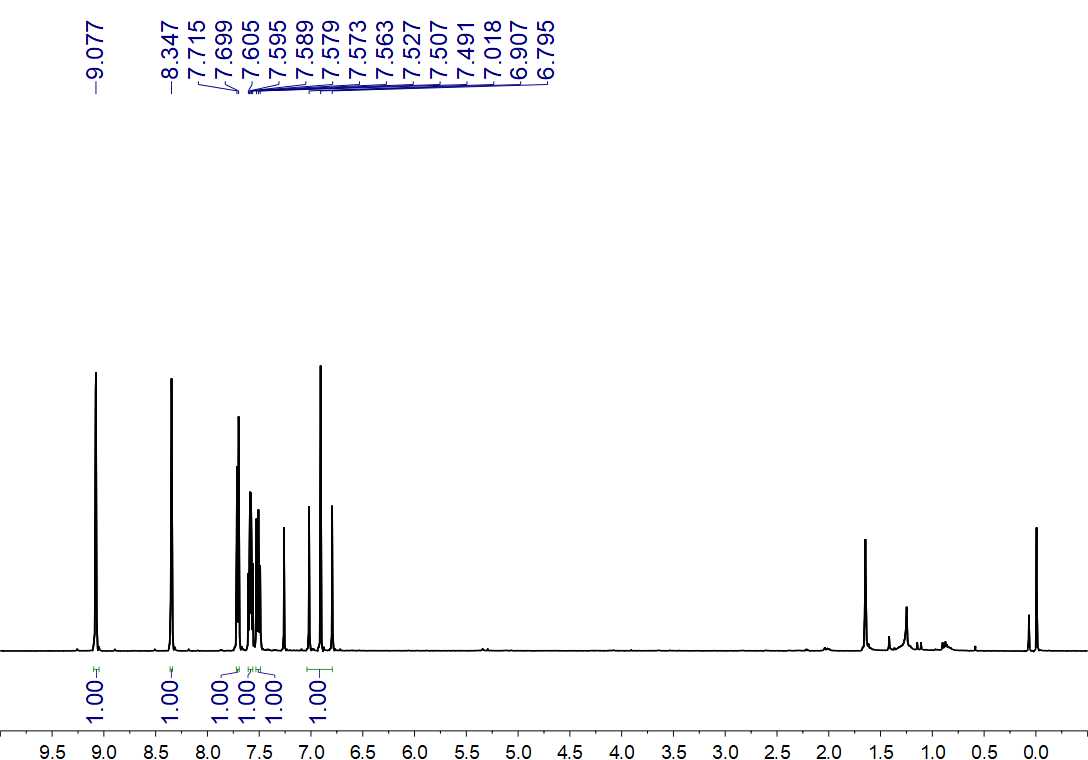
**

**Fig. S105**. **1H NMR** (500 MHz, CDCl3) spectrum of **31**


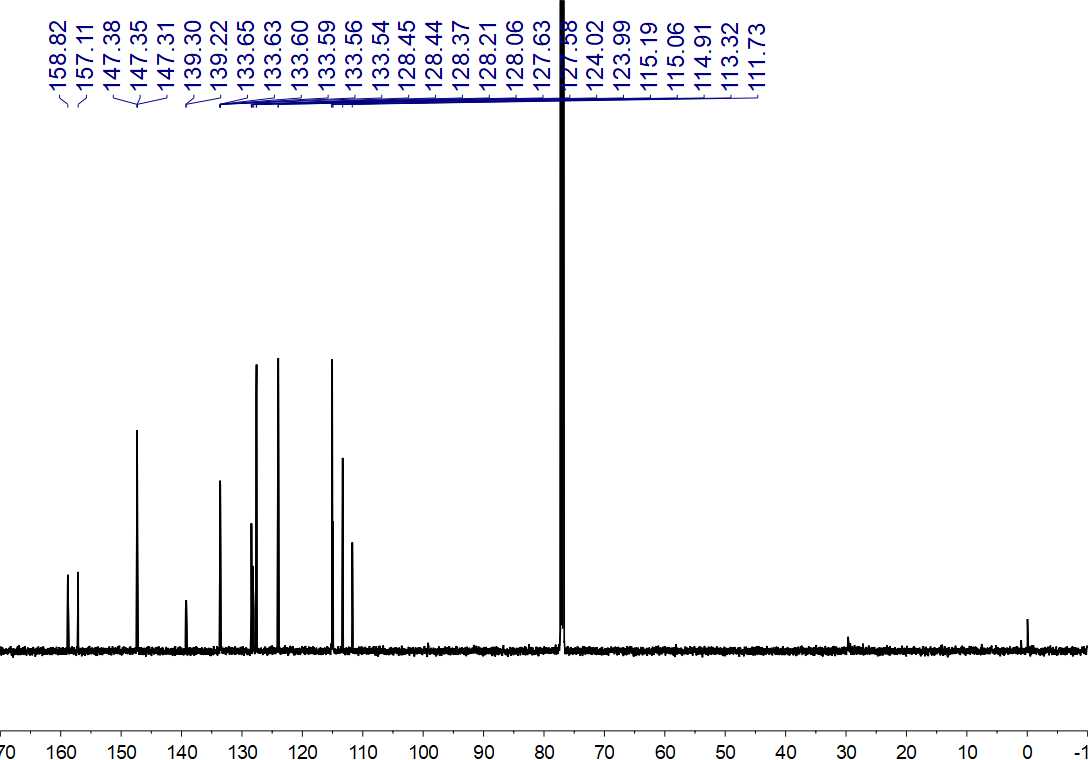


**Fig. S106**. **13C NMR** (150 MHz, CDCl3) spectrum of **31**


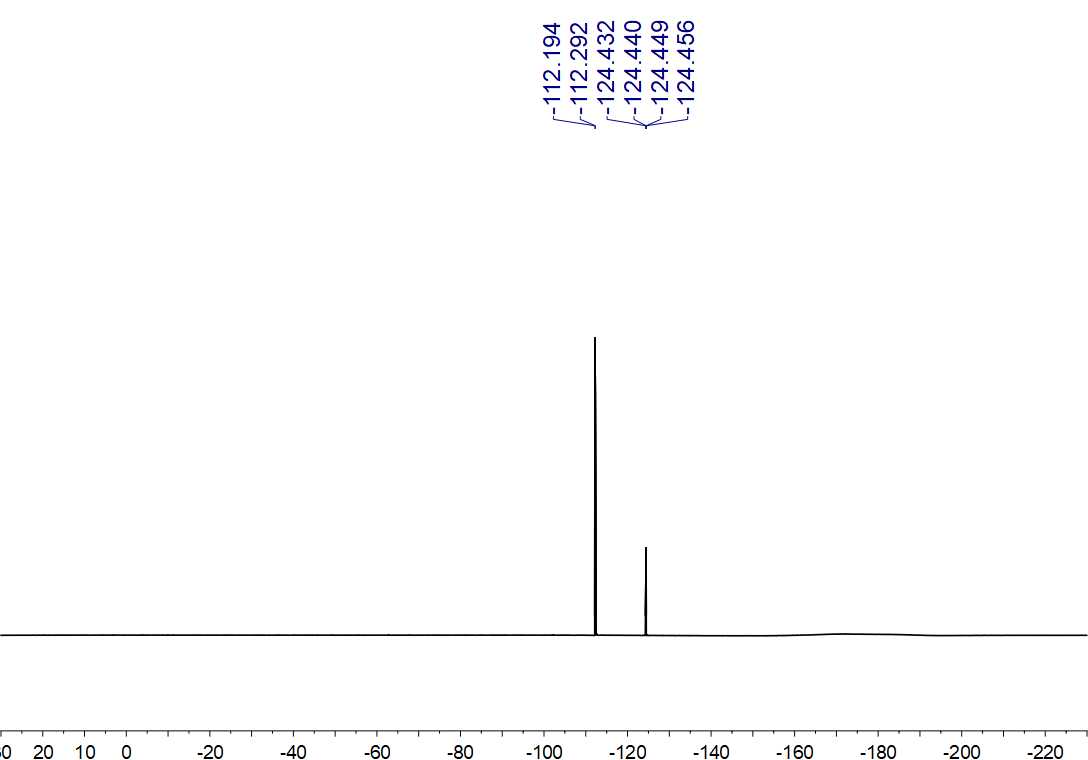


**Fig. S107**. **19F NMR** (564 MHz, CDCl3) spectrum of **31**

**Fig. S108**. **1H NMR** (500 MHz, CDCl3) spectrum of **32**

**Fig. S109**. **13C NMR** (150 MHz, CDCl3) spectrum of **32**

**Fig. S110**. **19F NMR** (564 MHz, CDCl3) spectrum of **32**

**Fig. S111**. **1H NMR** (500 MHz, CDCl3) spectrum of **33**

**Fig. S112**. **13C NMR** (150 MHz, CDCl3) spectrum of **33**

**Fig. S113**. **19F NMR** (564 MHz, CDCl3) spectrum of **33**

**Fig. S114**. **1H NMR** (500 MHz, CDCl3) spectrum of **34**

**Fig. S115**. **13C NMR** (125 MHz, CDCl3) spectrum of **34**

**Fig. S116**. **19F NMR** (564 MHz, CDCl3) spectrum of **34**

**Fig. S117**. **1H NMR** (500 MHz, CDCl3) spectrum of **35**

**Fig. S118**. **13C NMR** (150 MHz, CDCl3) spectrum of **35**

**Fig. S119**. **19F NMR** (564 MHz, CDCl3) spectrum of **35**

**Fig. S120**. **1H NMR** (500 MHz, CDCl3) spectrum of **37**

**Fig. S121**. **13C NMR** (150 MHz, CDCl3) spectrum of **37**

**Fig. S122.** **19F NMR** (564 MHz, CDCl3) spectrum of **37**

**Fig. S123**. **1H NMR** (500 MHz, CDCl3) spectrum of **38**

**Fig. S124**. **13C NMR** (150 MHz, CDCl3) spectrum of **38**

**Fig. S125**. **19F NMR** (564 MHz, CDCl3) spectrum of **38**

**Fig. S126**. **1H NMR** (500 MHz, CDCl3) spectrum of **39**

**Fig. S127**. **13C NMR** (150 MHz, CDCl3) spectrum of **39**

**Fig. S128**. **19F NMR** (564 MHz, CDCl3) spectrum of **39**

**Fig. S129**. **1H NMR** (500 MHz, CDCl3) spectrum of **40**

**Fig. S130**. **13C NMR** (150 MHz, CDCl3) spectrum of **40**

**Fig. S131**. **19F NMR** (564 MHz, CDCl3) spectrum of **40**

**Fig. S132**. **1H NMR** (500 MHz, CDCl3) spectrum of **41**

**Fig. S133**. **13C NMR** (150 MHz, CDCl3) spectrum of **41**

**Fig. S134**. **19F NMR** (564 MHz, CDCl3) spectrum of **41**

**Fig. S135**. **1H NMR** (500 MHz, CDCl3) spectrum of **42**

**Fig. S136**. **13C NMR** (150 MHz, CDCl3) spectrum of **42**

**Fig. S137**. **19F NMR** (564 MHz, CDCl3) spectrum of **42**

**Fig. S138**. **1H NMR** (500 MHz, CDCl3) spectrum of **43**

**Fig. S139**. **13C NMR** (125 MHz, CDCl3) spectrum of **43**

**Fig. S140**. **19F NMR** (470 MHz, CDCl3) spectrum of **43**

**Fig. S141**. **1H NMR** (500 MHz, CDCl3) spectrum of **44**

**Fig. S142**. **13C NMR** (125 MHz, CDCl3) spectrum of **44**

**Fig. S143**. **19F NMR** (470 MHz, CDCl3) spectrum of **44**

**Fig. S144**. **1H NMR** (500 MHz, CDCl3) spectrum of **45**

**Fig. S145**. **13C NMR** (150 MHz, CDCl3) spectrum of **45**

**Fig. S146**. **19F NMR** (564 MHz, CDCl3) spectrum of **45**

**Fig. S147**. **1H NMR** (500 MHz, CDCl3) spectrum of **46**

**Fig. S148**. **13C NMR** (125 MHz, CDCl3) spectrum of **46**

**Fig. S149**. **19F NMR** (470 MHz, CDCl3) spectrum of **46**

**Fig. S150**. **1H NMR** (500 MHz, CDCl3) spectrum of **47**

**Fig. S151**. **13C NMR** (150 MHz, CDCl3) spectrum of **47**

**Fig. S152**. **19F NMR** (564 MHz, CDCl3) spectrum of **47**

**Fig. S153**. **1H NMR** (500 MHz, CDCl3) spectrum of **48**

**Fig. S154**. **13C NMR** (150 MHz, CDCl3) spectrum of **48**

**Fig. S155**. **19F NMR** (564 MHz, CDCl3) spectrum of **48**

**Fig. S156**. **1H NMR** (500 MHz, CDCl3) spectrum of **49**

**Fig. S157**. **13C NMR** (150 MHz, CDCl3) spectrum of **49**

**Fig. S158**. **19F NMR** (564 MHz, CDCl3) spectrum of **49**

**Fig. S159**. **1H NMR** (500 MHz, CDCl3) spectrum of **50**

**Fig. S160**. **13C NMR** (150 MHz, CDCl3) spectrum of **50**

**Fig. S161**. **19F NMR** (564 MHz, CDCl3) spectrum of **50**

**Fig. S162**. **1H NMR** (500 MHz, CDCl3) spectrum of **51**

**Fig. S163**. **13C NMR** (150 MHz, CDCl3) spectrum of **51**

**Fig. S164**. **19F NMR** (564 MHz, CDCl3) spectrum of **51**

**Fig. S165**. **1H NMR** (500 MHz, CDCl3) spectrum of **52**

**Fig. S166**. **13C NMR** (150 MHz, CDCl3) spectrum of **52**

**Fig. S167**. **19F NMR** (564 MHz, CDCl3) spectrum of **52**

**Fig. S168**. **1H NMR** (500 MHz, CDCl3) spectrum of **53**

**Fig. S169**. **13C NMR** (150 MHz, CDCl3) spectrum of **53**

**Fig. S170**. **19F NMR** (564 MHz, CDCl3) spectrum of **53**

**Fig. S171**. **1H NMR** (500 MHz, CDCl3) spectrum of **54**

**Fig. S172**. **13C NMR** (150 MHz, CDCl3) spectrum of **54**

**Fig. S173**. **19F NMR** (564 MHz, CDCl3) spectrum of **54**

**Fig. S174**. **1H NMR** (600 MHz, CDCl3) spectrum of **55**

**Fig. S175**. **13C NMR** (150 MHz, CDCl3) spectrum of **55**

**Fig. S176**. **19F NMR** (564 MHz, CDCl3) spectrum of **55**

**Fig. S177**. **1H NMR** (500 MHz, CDCl3) spectrum of **56**

**Fig. S178**. **13C NMR** (125 MHz, CDCl3) spectrum of **56**

**Fig. S179**. **1H NMR** (500 MHz, CDCl3) spectrum of **57**

**Fig. S180**. **13C NMR** (125 MHz, CDCl3) spectrum of **57**

**Fig. S181** **1H NMR** (500 MHz, CDCl3) spectrum of **58**

**Fig. S182**. **13C NMR** (125 MHz, CDCl3) spectrum of **58**

**Fig. S183**. **1H NMR** (500 MHz, CDCl3) spectrum of **59**

**Fig. S184**. **13C NMR** (150 MHz, CDCl3) spectrum of **59**

**Fig. S185**. **1H NMR** (500 MHz, CDCl3) spectrum of **60**

**Fig. S186**. **13C NMR** (125 MHz, CDCl3) spectrum of **60**

**Fig. S187.** **1H NMR** (500 MHz, CDCl3) spectrum of **61**

**Fig. S188**. **13C NMR** (125 MHz, CDCl3) spectrum of **61**

**Fig. S189**. **1H NMR** (500 MHz, CDCl3) spectrum of **62**

**Fig. S190**. **13C NMR** (125 MHz, CDCl3) spectrum of **62**

**Fig. S191**. **1H NMR** (500 MHz, CDCl3) spectrum of **63**

**Fig. S192**. **13C NMR** (125 MHz, CDCl3) spectrum of **63**

**Fig. S193**. **1H NMR** (500 MHz, CDCl3) spectrum of **64**

**Fig. S194**. **13C NMR** (125 MHz, CDCl3) spectrum of **64**

**Fig. S195**. **1H NMR** (600 MHz, CDCl3) spectrum of **65**

**Fig. S196**. **13C NMR** (150 MHz, CDCl3) spectrum of **65**

**Fig. S197**. **19F NMR** (564 MHz, CDCl3) spectrum of **65**

**Fig. S198**. **1H NMR** (500 MHz, CDCl3) spectrum of **66**

**Fig. S199**. **13C NMR** (150 MHz, CDCl3) spectrum of **66**

**Fig. S200**. **1H NMR** (600 MHz, CDCl3) spectrum of **67**

**Fig. S201**. **13C NMR** (150 MHz, CDCl3) spectrum of **67**

**Fig. S202**. **19F NMR** (564 MHz, CDCl3) spectrum of **67**

**Fig. S203**. **1H NMR** (500 MHz, CDCl3) spectrum of **68**

**Fig. S204**. **13C NMR** (150 MHz, CDCl3) spectrum of **68**

**Fig. S205**. **1H NMR** (500 MHz, CDCl3) spectrum of **69**

**Fig. S206**. **13C NMR** (125 MHz, CDCl3) spectrum of **69**

**Fig. S207**. **1H NMR** (500 MHz, CDCl3) spectrum of **70**

**Fig. S208**. **13C NMR** (150 MHz, CDCl3) spectrum of **70**

**Fig. S209**. **1H NMR** (500 MHz, CDCl3) spectrum of **71**

**Fig. S210**. **13C NMR** (150 MHz, CDCl3) spectrum of **71**

**Fig. S211**. **1H NMR** (500 MHz, CDCl3) spectrum of **72**

**Fig. S212**. **13C NMR** (150 MHz, CDCl3) spectrum of **72**

**Fig. S213.** **1H NMR** (500 MHz, CDCl3) spectrum of **73**

**Fig. S214**. **13C NMR** (125 MHz, CDCl3) spectrum of **73**

**Fig. S215**. **19F NMR** (564 MHz, CDCl3) spectrum of **72**

**Fig. S216**. **1H NMR** (500 MHz, CDCl3) spectrum of **74**

**Fig. S217**. **13C NMR** (125 MHz, CDCl3) spectrum of **74**

**Fig. S218**. **19F NMR** (470 MHz, CDCl3) spectrum of **74**

**Fig. S219**. **1H NMR** (500 MHz, DMSO-*d*6) spectrum of **75**

**Fig. S220**. **13C NMR** (150 MHz, DMSO-*d*6) spectrum of **75**

**Fig. S221**. **1H NMR** (600 MHz, CDCl3) spectrum of **76**

**Fig. S222**. **13C NMR** (150 MHz, CDCl3) spectrum of **76**

**Fig. S224**. **1H NMR** (600 MHz, CDCl3) spectrum of **77**

**Fig. S224**. **13C NMR** (150 MHz, CDCl3) spectrum of **77**

**Fig. S225**. **1H NMR** (500 MHz, CDCl3) spectrum of **78**

**Fig. S226**. **13C NMR** (125 MHz, CDCl3) spectrum of **78**

**Fig. S227**. **1H NMR** (500 MHz, CDCl3) spectrum of **79**

**Fig. S228**. **13C NMR** (150 MHz, CDCl3) spectrum of **79**

**Fig. S229**. **1H NMR** (500 MHz, CDCl3) spectrum of **80**

**Fig. S330**. **13C NMR** (150 MHz, CDCl3) spectrum of **80**

**Fig. S231**. **1H NMR** (500 MHz, CDCl3) spectrum of **81**

**Fig. S232**. **13C NMR** (150 MHz, CDCl3) spectrum of **81**

**Fig. S233**. **1H NMR** (500 MHz, CDCl3) spectrum of **82**

**Fig. S234**. **13C NMR** (150 MHz, CDCl3) spectrum of **82**

**Fig. S235**. **1H NMR** (500 MHz, CDCl3) spectrum of **83**

**Fig. S236**. **13C NMR** (150 MHz, CDCl3) spectrum of **83**

**Fig. S237**. **1H NMR** (500 MHz, CDCl3) spectrum of **84**

**Fig. S238**. **13C NMR** (150 MHz, CDCl3) spectrum of **84**

**Fig. S239**. **1H NMR** (500 MHz, CDCl3) spectrum of **85**

**Fig. S240**. **13C NMR** (125 MHz, CDCl3) spectrum of **85**

**Fig. S241**. **1H NMR** (500 MHz, CDCl3) spectrum of **86**

**Fig. S242**. **13C NMR** (125 MHz, CDCl3) spectrum of **86**

**Fig. S243**. **1H NMR** (500 MHz, CDCl3) spectrum of **87**

**Fig. S44**. **13C NMR** (125 MHz, CDCl3) spectrum of **88**

**Fig. S245**. **1H NMR** (500 MHz, CDCl3) spectrum of **88**

**Fig. S246**. **13C NMR** (150 MHz, CDCl3) spectrum of **88**

**Fig. S247**. **1H NMR** (500 MHz, CDCl3) spectrum of **89**

**Fig. S248**. **13C NMR** (150 MHz, CDCl3) spectrum of **89**

**Fig. S249**. **1H NMR** (500 MHz, CDCl3) spectrum of **90**

**Fig. S250**. **13C NMR** (150 MHz, CDCl3) spectrum of **90**

**Fig. S251**. **1H NMR** (500 MHz, CDCl3) spectrum of **91**

**Fig. S252**. **13C NMR** (150 MHz, CDCl3) spectrum of **91**

**Fig. S253**. **1H NMR** (500 MHz, CDCl3) spectrum of **92**

**Fig. S254**. **13C NMR** (125 MHz, CDCl3) spectrum of **92**

**Fig. S255**. **1H NMR** (500 MHz, CDCl3) spectrum of **93**

**Fig. S256**. **13C NMR** (150 MHz, CDCl3) spectrum of **93**

**Fig. S257**. **1H NMR** (500 MHz, CDCl3) spectrum of **94**

**Fig. S258**. **13C NMR** (150 MHz, CDCl3) spectrum of **94**

**Fig. S259**. **1H NMR** (500 MHz, CDCl3) spectrum of **95**

**Fig. S260**. **13C NMR** (150 MHz, CDCl3) spectrum of **95**

**Fig. S261** **1H NMR** (500 MHz, CDCl3) spectrum of **96**

**Fig. S262**. **13C NMR** (125 MHz, CDCl3) spectrum of **96**

**Fig. S263**. **1H NMR** (500 MHz, CDCl3) spectrum of **98**

**Fig. S264**. **13C NMR** (150 MHz, CDCl3) spectrum of **98**

**Fig. S265**. **1H NMR** (500 MHz, DMSO-*d*6) spectrum of **98**

**Fig. S266**. **13C NMR** (150 MHz, DMSO-*d*6) spectrum of **98**

**Fig. S267**. **1H NMR** (500 MHz, CDCl3) spectrum of **99**

**Fig. S268**. **13C NMR** (150 MHz, CDCl3) spectrum of **99**

**Fig. S269**. **1H NMR** (500 MHz, CDCl3) spectrum of **100**

**Fig. S270**. **13C NMR** (150 MHz, CDCl3) spectrum of **100**

**Fig. S271**. **1H NMR** (500 MHz, CDCl3) spectrum of **101**

**Fig. S272**. **13C NMR** (150 MHz, CDCl3) spectrum of **101**

**Fig. S273**. **1H NMR** (500 MHz, CDCl3) spectrum of **102**

**Fig. S274**. **13C NMR** (150 MHz, CDCl3) spectrum of **102**

**Fig. S275**. **1H NMR** (500 MHz, CDCl3) spectrum of **103**

**Fig. S276**. **13C NMR** (150 MHz, CDCl3) spectrum of **103**

**Fig. S277**. **1H NMR** (500 MHz, CDCl3) spectrum of **104**

**Fig. S278**. **13C NMR** (150 MHz, CDCl3) spectrum of **104**

**Fig. S279**. **19F NMR** (564 MHz, CDCl3) spectrum of **104**

**Fig. S280**. **1H NMR** (500 MHz, CDCl3) spectrum of **105**

**Fig. S281**. **13C NMR** (150 MHz, CDCl3) spectrum of **105**

**Fig. S282**. **19F NMR** (564 MHz, CDCl3) spectrum of **105**

**Fig. S283**. **1H NMR** (500 MHz, CDCl3) spectrum of **106**

**Fig. S284**. **13C NMR** (150 MHz, CDCl3) spectrum of **106**

**Fig. S285**. **1H NMR** (500 MHz, CDCl3) spectrum of **107**

**Fig. S286**. **13C NMR** (150 MHz, CDCl3) spectrum of **107**

**Fig. S287**. **1H NMR** (500 MHz, CDCl3) spectrum of **108**

**Fig. S288**. **13C NMR** (150 MHz, CDCl3) spectrum of **108**

**Fig. S289**. **19F NMR** (564 MHz, CDCl3) spectrum of **108**

**Fig. S290**. **1H NMR** (500 MHz, CDCl3) spectrum of **109**

**Fig. S291**. **13C NMR** (150 MHz, CDCl3) spectrum of **109**

**Fig. S292**. **1H NMR** (500 MHz, CDCl3) spectrum of **110**

**Fig. S293**. **13C NMR** (125 MHz, CDCl3) spectrum of **110**

**Fig. S294**. **1H NMR** (500 MHz, CDCl3) spectrum of **111**

**Fig. S295**. **13C NMR** (125 MHz, CDCl3) spectrum of **111**

**Fig. S296**. **1H NMR** (500 MHz, CDCl3) spectrum of **112**

**Fig. S297**. **13C NMR** (125 MHz, CDCl3) spectrum of **112**

**Fig. S298**. **1H NMR** (500 MHz, CDCl3) spectrum of **113**

**Fig. S299**. **13C NMR** (125 MHz, CDCl3) spectrum of **113**

**Fig. S300**. **1H NMR** (500 MHz, CDCl3) spectrum of **114**

**Fig. S301**. **13C NMR** (150 MHz, CDCl3) spectrum of **114**

**Fig. S302**. **1H NMR** (500 MHz, CDCl3) spectrum of **115**

**Fig. S303**. **13C NMR** (150 MHz, CDCl3) spectrum of **115**

**Fig. S304**. **1H NMR** (500 MHz, CDCl3) spectrum of **116**

**Fig. S305**. **13C NMR** (150 MHz, CDCl3) spectrum of **116**

**Fig. S306**. **1H NMR** (500 MHz, CDCl3) spectrum of **117**

**Fig. S307**. **13C NMR** (125 MHz, CDCl3) spectrum of **117**

**Fig. S308**. **1H NMR** (500 MHz, CDCl3) spectrum of **118**

**Fig. S309**. **13C NMR** (125 MHz, CDCl3) spectrum of **118**

**Fig. S310**. **1H NMR** (500 MHz, CDCl3) spectrum of **119**

**Fig. S311**. **13C NMR** (125 MHz, CDCl3) spectrum of **119**

**Fig. S312**. **1H NMR** (500 MHz, CDCl3) spectrum of **120**

**Fig. S313**. **13C NMR** (150 MHz, CDCl3) spectrum of **120**

**Fig. S314**. **19F NMR** (564 MHz, CDCl3) spectrum of **120**

**Fig. S315**. **1H NMR** (600 MHz, CDCl3) spectrum of **121**

**Fig. S316**. **13C NMR** (150 MHz, CDCl3) spectrum of **121**

**Fig. S317**. **19F NMR** (564 MHz, CDCl3) spectrum of **121**

**Fig. S318**. **1H NMR** (500 MHz, CDCl3) spectrum of **122**

**Fig. S319**. **13C NMR** (150 MHz, CDCl3) spectrum of **122**

**Fig. S320**. **1H NMR** (500 MHz, CDCl3) spectrum of **123**

**Fig. S321**. **13C NMR** (150 MHz, CDCl3) spectrum of **123**

**Fig. S322**. **1H NMR** (600 MHz, CDCl3) spectrum of **124**

**Fig. S323**. **13C NMR** (125 MHz, CDCl3) spectrum of **124**

**Fig. S324**. **1H NMR** (500 MHz, CDCl3) spectrum of **125**

**Fig. S325**. **13C NMR** (150 MHz, CDCl3) spectrum of **125**

**Fig. S326**. **19F NMR** (564 MHz, CDCl3) spectrum of **125**

**Fig. S327**. **1H NMR** (500 MHz, CDCl3) spectrum of **126**

**Fig. S328**. **13C NMR** (150 MHz, CDCl3) spectrum of **126**

**Fig. S329**. **19F NMR** (564 MHz, CDCl3) spectrum of **126**

**Fig. S330**. **1H NMR** (500 MHz, CDCl3) spectrum of **127**

**Fig. S331**. **13C NMR** (150 MHz, CDCl3) spectrum of **127**

**Fig. S332**. **19F NMR** (564 MHz, CDCl3) spectrum of **127**

**Fig. S333**. **1H NMR** (500 MHz, CDCl3) spectrum of **128**

**Fig. S334**. **13C NMR** (150 MHz, CDCl3) spectrum of **128**

**Fig. S335**. **19F NMR** (564 MHz, CDCl3) spectrum of **129**

**Fig. S336** **1H NMR** (500 MHz, DMSO-*d*6) spectrum of **131**

**Fig. S337**. **13C NMR** (150 MHz, DMSO-*d*6) spectrum of **131**

**Fig. S338**. **1H NMR** (600 MHz, CDCl3) spectrum of **133ʹ**

**Fig. S339**. **13C NMR** (125 MHz, CDCl3) spectrum of **133ʹ**

**Fig. S340**. **19F NMR** (470 MHz, CDCl3) spectrum of **133ʹ**

**Fig. S341**. **1H NMR** (500 MHz, CDCl3) spectrum of **133**

**Fig. S342**. **13C NMR** (150 MHz, CDCl3) spectrum of **133**

**Fig. S343**. **19F NMR** (564 MHz, CDCl3) spectrum of **133**

**Fig. S344**. **1H NMR** (500 MHz, CDCl3) spectrum of **134ʹ**

**Fig. S345**. **13C NMR** (150 MHz, CDCl3) spectrum of **134ʹ**

**Fig. S346**. **1H NMR** (500 MHz, CDCl3) spectrum of **134ʹʹ**

**Fig. S347**. **13C NMR** (125 MHz, CDCl3) spectrum of **134ʹʹ**

**Fig. S348**. **1H NMR** (500 MHz, CDCl3) spectrum of **134**

**Fig. S349**. **13C NMR** (150 MHz, CDCl3) spectrum of **134**

**Fig. S350**. **1H NMR** (500 MHz, CDCl3) spectrum of **137ʹ**

**Fig. S351**. **13C NMR** (150 MHz, CDCl3) spectrum of **137ʹ**

**Fig. S352**. **1H NMR** (500 MHz, CDCl3) spectrum of **137**

**Fig. S353**. **13C NMR** (150 MHz, CDCl3) spectrum of **137**

**Fig. S354**. **1H NMR** (500 MHz, CDCl3) spectrum of **138**

**Fig. S355**. **13C NMR** (150 MHz, CDCl3) spectrum of **138**

**Fig. S356**. **1H NMR** (500 MHz, CDCl3) spectrum of **139**

**Fig. S357**. **13C NMR** (150 MHz, CDCl3) spectrum of **139**

**Fig. S358**. **1H NMR** (500 MHz, CDCl3) spectrum of **140ʹ**

**Fig. S359**. **13C NMR** (150 MHz, CDCl3) spectrum of **140ʹ**

**Fig. S360**. **1H NMR** (500 MHz, CDCl3) spectrum of **140ʹʹ**

**Fig. S361**. **13C NMR** (125 MHz, CDCl3) spectrum of **140ʹʹ**

**Fig. S362**. **1H NMR** (500 MHz, CDCl3) spectrum of **140**

**Fig. S363**. **13C NMR** (125 MHz, CDCl3) spectrum of **140**

**Fig. S364**. **1H NMR** (500 MHz, CDCl3) spectrum of **142ʹ**

**Fig. S365**. **13C NMR** (150 MHz, CDCl3) spectrum of **142ʹ**

**Fig. S366**. **19F NMR** (564 MHz, CDCl3) spectrum of **142ʹ**

**Fig. S367**. **1H NMR** (500 MHz, CDCl3) spectrum of **142ʹʹ**

**Fig. S368**. **13C NMR** (150 MHz, CDCl3) spectrum of **142ʹʹ**

**Fig. S369**. **19F NMR** (564 MHz, CDCl3) spectrum of **142ʹʹ**

**Fig. S370**. **1H NMR** (500 MHz, DMSO-*d*6) spectrum of **142**

**Fig. S371**. **13C NMR** (150 MHz, DMSO-*d*6) spectrum of **142**

**Fig. S372**. **19F NMR** (564 MHz, DMSO-*d*6) spectrum of **142**
