# Supplementary material for: Halogen-Free Ciamician-Dennstedt Single-Atom Skeletal Editing
Source: Research Square preprint supplement (doi:10.21203/rs.3.rs-4163086/v1), 2024-06-18
Supplement: Supplementary file 2 [file ee3a5fd809a78077863f5586.docx]

**Cartesian coordinates (Å) and energies for all Calculated Structures:**

Cartesian coordinates are given in Å, self-consistent field (SCF) Gibbs free energies (G) are given in Hartrees, and imaginary vibrational frequencies (ν) are given in cm–1.

**Copper catalysed *N*-TBS-indole one carbon insertion process to form 3-Formylquinoline:**

**Int1** (G = -1265.834681)

C -4.31829400 -1.88497000 1.23059800

H -4.38414800 -2.49901300 2.12676000

C -5.49499900 1.54380700 -2.34393200

C -6.70851400 1.01985500 -1.90028600

C -6.73061200 0.24296600 -0.73607500

C -5.55427500 0.01377800 -0.04792000

C -4.31771800 0.57346800 -0.46959200

C -4.30167000 1.32985200 -1.65465600

H -5.47277200 2.14605200 -3.25148600

H -7.62540900 1.20783500 -2.45419800

H -7.66522700 -0.18623900 -0.37516300

H -3.37516900 1.76141600 -2.02677700

C -5.30831900 -0.72829000 1.20535400

C -3.83978600 -0.47427900 1.47136900

H -3.46608600 -0.26547100 2.47196400

N -3.28810300 0.29012400 0.38809900

H -6.06141200 -0.74197600 1.99008800

Si -1.35248700 0.69145300 0.16645000

C -1.47370800 2.60120100 0.56900600

C -1.20410800 3.41713400 -0.69681400

C -2.80659700 3.05075900 1.16225300

C -0.39248600 2.95972000 1.59684800

H -0.25726100 3.12394600 -1.16913600

H -2.00019500 3.30265400 -1.44604600

H -1.13948700 4.49377300 -0.46197100

H -3.05570400 2.49672900 2.07903500

H -2.75909500 4.11997100 1.43096300

H -3.64368600 2.92683500 0.46496900

H -0.43015000 4.03727400 1.83018600

H -0.53859600 2.42204600 2.54597300

H 0.61506800 2.72887300 1.23295300

C -1.36401600 -0.00045600 -1.61396200

H -0.64964500 -0.83514900 -1.64231400

H -2.32287000 -0.36193500 -1.99554700

H -0.97467900 0.74612200 -2.31960800

C -0.92773700 -0.40652000 1.66523900

H 0.15717800 -0.51534600 1.76865200

H -1.30157300 0.03810200 2.59903200

H -1.36700800 -1.40851800 1.59449800

C -3.90084300 -2.72133700 0.07649200

F -4.48606300 -3.93433200 0.13318700

F -4.18116800 -2.22703100 -1.13426500

F -2.56816400 -2.95677900 0.08627400

**Int2** (G = -1385.887233)

C -4.31829400 -1.88497000 1.23059800

H -4.38414800 -2.49901300 2.12676000

C -5.49499900 1.54380700 -2.34393200

C -6.70851400 1.01985500 -1.90028600

C -6.73061200 0.24296600 -0.73607500

C -5.55427500 0.01377800 -0.04792000

C -4.31771800 0.57346800 -0.46959200

C -4.30167000 1.32985200 -1.65465600

H -5.47277200 2.14605200 -3.25148600

H -7.62540900 1.20783500 -2.45419800

H -7.66522700 -0.18623900 -0.37516300

H -3.37516900 1.76141600 -2.02677700

C -5.30831900 -0.72829000 1.20535400

C -3.83978600 -0.47427900 1.47136900

H -3.46608600 -0.26547100 2.47196400

N -3.28810300 0.29012400 0.38809900

H -6.06141200 -0.74197600 1.99008800

Si -1.35248700 0.69145300 0.16645000

C -1.47370800 2.60120100 0.56900600

C -1.20410800 3.41713400 -0.69681400

C -2.80659700 3.05075900 1.16225300

C -0.39248600 2.95972000 1.59684800

H -0.25726100 3.12394600 -1.16913600

H -2.00019500 3.30265400 -1.44604600

H -1.13948700 4.49377300 -0.46197100

H -3.05570400 2.49672900 2.07903500

H -2.75909500 4.11997100 1.43096300

H -3.64368600 2.92683500 0.46496900

H -0.43015000 4.03727400 1.83018600

H -0.53859600 2.42204600 2.54597300

H 0.61506800 2.72887300 1.23295300

C -1.36401600 -0.00045600 -1.61396200

H -0.64964500 -0.83514900 -1.64231400

H -2.32287000 -0.36193500 -1.99554700

H -0.97467900 0.74612200 -2.31960800

C -0.92773700 -0.40652000 1.66523900

H 0.15717800 -0.51534600 1.76865200

H -1.30157300 0.03810200 2.59903200

H -1.36700800 -1.40851800 1.59449800

F 0.43259000 0.93914000 -0.13326100

C -3.90084300 -2.72133700 0.07649200

F -4.48606300 -3.93433200 0.13318700

F -4.18116800 -2.22703100 -1.13426500

F -2.56816400 -2.95677900 0.08627400

Cs 3.20893807 -0.11709812 -0.21621477

**TS1** (G = -1385.862945; *v* = -411.68)

C -3.94250900 -1.30209500 0.99079600

H -4.26547700 -1.93495500 1.82294200

C -2.84279200 2.78959500 -1.71981400

C -4.04095900 3.11266200 -1.05882700

C -4.54237500 2.26524400 -0.08916400

C -3.87546800 1.06867100 0.24708600

C -2.59234500 0.81051400 -0.34182900

C -2.12877200 1.65723400 -1.36759900

H -2.46126700 3.44127900 -2.50401700

H -4.58463900 4.01680400 -1.32708400

H -5.48900700 2.49190400 0.40307100

H -1.18239200 1.44931800 -1.85904800

C -4.31602800 0.11758800 1.20071400

C -2.54300900 -0.88481400 1.18660500

H -2.01953000 -1.28432100 2.05227100

N -1.83864600 -0.14254400 0.30503900

H -5.05360300 0.37358200 1.96045900

Si 0.29563300 -0.27610600 0.14056100

C 0.57978900 1.42398200 1.05897300

C 1.04790200 2.49265700 0.06829900

C -0.60286600 1.97693800 1.85315100

C 1.70640700 1.19386400 2.07897200

H 1.90723700 2.15015200 -0.52371400

H 0.25274900 2.78293400 -0.63190400

H 1.35640700 3.40723800 0.60284700

H -1.01687000 1.23507300 2.55095000

H -0.27133200 2.83929700 2.45491300

H -1.42302200 2.32402700 1.21471700

H 1.91814000 2.13017400 2.62122800

H 1.42337700 0.44442100 2.83353500

H 2.63655800 0.86098900 1.60692000

C 0.02195000 -0.67733500 -1.70217600

H 0.54649900 -1.62740300 -1.87946400

H -1.01577500 -0.79951700 -2.02451000

H 0.50940800 0.06074700 -2.35343800

C 0.31674400 -1.78960900 1.28121900

H 1.34312000 -2.17150800 1.34378800

H -0.01122600 -1.57202700 2.30577300

H -0.32021700 -2.59760400 0.89790300

F 2.02739500 -0.36707000 -0.20124300

C -4.34715700 -2.04430300 -0.25346400

F -5.67943500 -2.22303700 -0.29647500

F -4.00559200 -1.45433300 -1.40785100

F -3.78586300 -3.26878000 -0.27491800

Cs 5.84641600 -0.37460200 -0.30262800

**Int3** (G = -1385.895972)

C -4.12176900 -1.91697600 0.37855000

H -3.19420400 -2.49934600 0.52766100

C -6.44765500 2.64834700 0.18441000

C -6.12326600 2.43772000 1.54404000

C -5.41468500 1.33287900 1.95420400

C -4.99479500 0.31810100 1.03024300

C -5.29660100 0.57464200 -0.36064100

C -6.00289500 1.72130900 -0.74434400

H -7.01016600 3.52676900 -0.12323600

H -6.44079600 3.16897000 2.28803400

H -5.17754300 1.19819700 3.01113000

H -6.17841300 1.86602900 -1.81172900

C -4.27205800 -0.81237500 1.37588000

C -4.10858300 -1.30331100 -1.00476600

H -3.55582900 -1.83237800 -1.78946800

N -4.71402600 -0.21186500 -1.33881600

H -3.96289300 -0.98213900 2.40748700

Si -0.63144700 0.98226400 -1.37250400

C -0.95936400 2.60764700 -0.47264500

C -0.45345000 3.77888600 -1.31331500

C -2.46412600 2.75331100 -0.24468300

C -0.23649200 2.58925200 0.87458600

H 0.62852900 3.71898600 -1.49402400

H -0.95236300 3.82626300 -2.29154600

H -0.65024600 4.73265300 -0.79840400

H -2.88373100 1.90156500 0.31205000

H -2.67756700 3.66261700 0.33964800

H -3.01381100 2.83672000 -1.19291800

H -0.34850700 3.55946200 1.38467100

H -0.64258000 1.81829600 1.54407100

H 0.84252000 2.40250600 0.76116800

C -1.64404600 0.77752500 -2.91970600

H -1.35995700 -0.14728800 -3.43893900

H -2.71306300 0.70736300 -2.67587900

H -1.50453800 1.61333100 -3.61590100

C -0.76055000 -0.47873000 -0.22404900

H 0.07606300 -0.47470900 0.48513600

H -1.69506300 -0.43752300 0.35605000

H -0.74334500 -1.43046400 -0.77087300

F 0.94415200 1.04963900 -1.85463500

C -5.20705300 -2.97437100 0.47391100

F -5.23916900 -3.54890500 1.68872400

F -6.43701900 -2.48560100 0.24536200

F -5.01965000 -3.96719800 -0.41938600

Cs 3.84555557 1.19183325 -0.38016833

**Int4** (G = -1462.272595)

C 2.23401200 -2.46386600 1.20174800

C 1.54548100 -1.86534400 -3.80909700

C 1.64765800 -3.25672400 -3.60334100

C 1.71920500 -3.79353500 -2.33607400

C 1.73109900 -2.96802800 -1.16969500

C 1.56407900 -1.55443000 -1.39892100

C 1.47778100 -1.03897300 -2.69814100

H 1.49821400 -1.45495600 -4.81500000

H 1.67532800 -3.92469200 -4.46438800

H 1.80565500 -4.87371600 -2.20540500

H 1.34881700 0.03964100 -2.80820900

C 1.82459300 -3.43933700 0.14261700

C 1.55887300 -1.15232700 0.87685300

N 1.33368700 -0.71630600 -0.31657200

H 1.25748400 -0.51483500 1.71355900

H 1.95015700 -4.50590400 0.33387800

H -0.11387300 -3.28054500 1.08294100

O -0.85687100 -3.20630500 1.71999700

H -1.44588500 -3.92852300 1.47239800

Si 2.77934700 2.91395500 0.62847000

C 1.81694200 3.79206500 -0.74068400

C 2.73867700 4.75515300 -1.48806000

C 1.28061900 2.74704200 -1.72017300

C 0.65054400 4.57074800 -0.13176800

H 3.09849200 5.56351500 -0.83868600

H 3.61764000 4.24154200 -1.90275700

H 2.20338700 5.22051500 -2.33040600

H 0.69529700 1.96157800 -1.21706200

H 0.62702600 3.22310000 -2.46908100

H 2.09555500 2.24908500 -2.26435900

H 0.11956600 5.13751900 -0.91324200

H -0.08321300 3.90663300 0.34857300

H 0.98846700 5.29490200 0.62363800

C 3.97616500 1.64614900 -0.02616100

H 4.54321300 1.18988600 0.79470100

H 3.43780600 0.84348800 -0.54691500

H 4.69314200 2.08768500 -0.72918800

C 1.63919500 2.21849000 1.92808300

H 1.15717000 3.02261600 2.49818400

H 0.85310300 1.61981100 1.44797800

H 2.17954700 1.57161800 2.63078500

F 3.67603800 4.06841400 1.37640600

H 1.92673700 -2.78715300 2.21020100

C 3.73104800 -2.25573100 1.34034100

F 4.31672400 -1.83574600 0.20706900

F 4.36015300 -3.38518200 1.70377700

F 4.01566000 -1.32855000 2.27981600

Cs -2.45200558 0.42075960 0.78048163

**TS2** (G = -1462.260220; *v* = -1631.69)

C 3.40194300 -0.25043800 1.00998700

C 2.09238500 -0.14350100 -3.90523200

C 2.95947300 -1.22870300 -3.76814200

C 3.39997200 -1.63014700 -2.51139900

C 3.00247300 -0.95781300 -1.34682700

C 2.12797000 0.14374000 -1.50202600

C 1.67605700 0.53316200 -2.76339200

H 1.74938900 0.17085700 -4.88797500

H 3.29660300 -1.76900700 -4.65143000

H 4.07966200 -2.47828100 -2.41943100

H 1.00727200 1.39176600 -2.82840800

C 3.36220800 -1.38623700 0.00312700

C 2.28351500 0.72929200 0.73560200

N 1.70105900 0.89608200 -0.38986000

H 1.95528500 1.36274000 1.56784600

H 4.27707000 -1.99118000 0.02774900

H 2.42728200 -2.10901200 0.52144900

O 1.48070300 -2.67570400 1.30102700

H 1.57764300 -3.62170100 1.14274200

Si -0.47504500 4.28724900 0.51696000

C -1.85467600 3.86224900 -0.70133400

C -2.20472200 5.09014200 -1.54140800

C -1.37435600 2.74157400 -1.62487300

C -3.09250200 3.40131300 0.06818700

H -2.61394600 5.90236500 -0.92704600

H -1.33010400 5.48358500 -2.07842300

H -2.96362400 4.83191300 -2.29643900

H -1.03565700 1.85454000 -1.06675200

H -2.19048100 2.42019800 -2.29248200

H -0.54139900 3.07179300 -2.26148100

H -3.92423600 3.20332000 -0.62712800

H -2.90553900 2.47457300 0.63048500

H -3.43870900 4.16181900 0.78298700

C 1.17635400 4.50195000 -0.31251800

H 1.92149900 4.88003700 0.39807300

H 1.53130500 3.52844700 -0.67791100

H 1.13458200 5.19369200 -1.16224300

C -0.38170800 3.05664600 1.91201700

H -1.28086900 3.09138700 2.53945700

H -0.28991400 2.04154700 1.50108300

H 0.48954700 3.24214200 2.55268900

F -0.87840000 5.72983900 1.18770300

H 3.25721400 -0.65264600 2.02603500

C 4.71281600 0.49464900 1.06879300

F 5.02262500 1.08178100 -0.09883900

F 5.73366700 -0.31787100 1.37886100

F 4.69657700 1.46950400 1.99698900

Cs -1.69206159 -1.07619604 1.03121330

**Int5** (G = -739.644139)

C -3.19844200 -0.56175000 0.87510200

C -2.00708300 -1.76062700 -3.95657500

C -3.26727700 -1.17335800 -4.03120100

C -3.85438100 -0.63940500 -2.88585400

C -3.19969600 -0.68030200 -1.65865900

C -1.93497500 -1.28489300 -1.58622600

C -1.34493600 -1.81511000 -2.73497300

H -1.54196000 -2.17734300 -4.84687100

H -3.79426400 -1.12799600 -4.98163600

H -4.83712400 -0.17067800 -2.94315500

H -0.36041100 -2.27367500 -2.64707100

C -3.76275400 -0.02318600 -0.43668500

C -1.81698800 -1.12000400 0.71997000

N -1.21694500 -1.39792900 -0.37362100

H -1.25487000 -1.27242600 1.64874600

H -4.85941700 -0.06015500 -0.44872600

H -3.48061200 1.04291400 -0.43702000

H -3.04557300 0.34545100 1.52385400

C -4.09208400 -1.56093700 1.53556000

F -4.33086000 -2.63275400 0.75297200

F -5.29131400 -1.04157900 1.84375900

F -3.56773500 -2.03284800 2.67984300

**Int6** (G = -739.649836)

C 0.57939800 -3.11500500 -1.83549700

C 1.13412800 -1.84552400 -1.97952100

C 0.76584500 -0.78121900 -1.15812600

C -0.19302700 -1.00309600 -0.14755200

C -0.75588500 -2.28489900 -0.00801400

C -0.37327000 -3.32815000 -0.83908100

H 0.88829900 -3.92727300 -2.48991400

H 1.88887400 -1.66737900 -2.74700200

H -1.48954700 -2.42255500 0.78548700

H -0.81875300 -4.31287500 -0.70730500

C -0.03632200 1.20906200 0.60639900

C 0.89351600 1.55190000 -0.32427800

H -0.37639900 1.95492000 1.32610200

N -0.60300000 -0.01106800 0.73377900

C 1.42136700 0.56826700 -1.33495900

H 2.51573400 0.44160100 -1.23480200

H 1.25975100 0.93615700 -2.36381300

C 1.47024800 2.89758800 -0.36258600

F 1.30830600 3.50123300 -1.56902000

F 2.81583000 2.90006300 -0.16998600

F 0.96090100 3.74145500 0.55061400

H -1.27548342 -0.30229491 1.44977874

**Int7** (G = -1412.638563)

S 4.40761600 -1.17235200 0.83370600

O 4.37966900 -0.82710400 -0.63894800

C 3.08361600 -2.36715200 1.14490300

H 3.30112300 -3.26705100 0.56190300

H 3.07383900 -2.61371500 2.21209200

H 2.12156900 -1.94032700 0.83722200

C 3.61901500 0.19519400 1.71876800

H 3.53687300 -0.06460400 2.77977100

H 4.25499500 1.07780100 1.60709300

H 2.62617400 0.39102700 1.29123300

C 0.57939800 -3.11500500 -1.83549700

C 1.13412800 -1.84552400 -1.97952100

C 0.76584500 -0.78121900 -1.15812600

C -0.19302700 -1.00309600 -0.14755200

C -0.75588500 -2.28489900 -0.00801400

C -0.37327000 -3.32815000 -0.83908100

H 0.88829900 -3.92727300 -2.48991400

H 1.88887400 -1.66737900 -2.74700200

H -1.48954700 -2.42255500 0.78548700

H -0.81875300 -4.31287500 -0.70730500

C -0.03632200 1.20906200 0.60639900

C 0.89351600 1.55190000 -0.32427800

H -0.37639900 1.95492000 1.32610200

N -0.60300000 -0.01106800 0.73377900

C 1.42136700 0.56826700 -1.33495900

H 2.51573400 0.44160100 -1.23480200

H 1.25975100 0.93615700 -2.36381300

Cs -3.96040500 0.12686000 0.00667400

F -2.25070200 -0.79952600 2.28645100

C 1.47024800 2.89758800 -0.36258600

F 1.30830600 3.50123300 -1.56902000

F 2.81583000 2.90006300 -0.16998600

F 0.96090100 3.74145500 0.55061400

H -1.45926800 -0.38188500 1.64545600

**TS3** (G = -1412.617813; *v* = -84.12)

S 4.92683000 0.18465600 0.34025600

O 4.06775100 0.28152700 1.58471100

C 4.23580900 1.32353400 -0.88460200

H 4.37416700 2.34334400 -0.51338600

H 4.77534300 1.19930800 -1.82972000

H 3.16739300 1.11616300 -1.02004100

C 4.44502700 -1.32910700 -0.52959000

H 5.06949500 -1.43825000 -1.42279900

H 4.62475000 -2.16951400 0.14709200

H 3.38633000 -1.28530700 -0.81243300

C 0.91371000 3.50539900 0.73392200

C 1.28054100 2.18875100 1.00686500

C 0.68162700 1.12818600 0.33264000

C -0.26636800 1.40847300 -0.66256300

C -0.65642000 2.72498400 -0.91772100

C -0.06747600 3.77226400 -0.21913200

H 1.39093500 4.32320400 1.26950800

H 2.05528000 1.96525500 1.74044800

H -1.42390000 2.90068300 -1.66920200

H -0.36812300 4.79723200 -0.42450500

C -0.37336200 -0.81269600 -1.37705500

C 0.67913900 -1.20422100 -0.48412500

H -0.81310100 -1.56179100 -2.03436100

N -0.85307100 0.38795700 -1.44191600

C 0.97534600 -0.30187500 0.67707900

H 2.00256800 -0.39686700 1.05591100

H 0.29083000 -0.62912800 1.48151700

Cs -3.40138100 -0.18542800 0.65785400

F -3.08150900 1.13473200 -2.27901000

C 0.93111300 -2.51107500 -0.38968300

F -1.47296700 -2.33784800 0.51936000

F 1.64413300 -3.04240300 0.56922100

F 0.53802600 -3.42567900 -1.23272900

H -2.17706900 0.79686600 -2.08614500

**Int8** (G = -1312.207390)

S -2.02116800 1.18313900 2.27841400

O -2.95801500 1.42285100 1.11305900

C -1.78208700 2.81074700 3.03589800

H -2.74994600 3.14162600 3.42363300

H -1.06289800 2.73780400 3.85840600

H -1.42766200 3.51389400 2.27336700

C -0.33823000 1.03922900 1.62615300

H 0.35764500 1.25025600 2.44790700

H -0.17061400 0.01000100 1.26475000

H -0.21873700 1.78742700 0.83081800

C -0.61969300 3.34157900 -2.24006000

C -1.48616500 2.28230300 -1.98487100

C -1.01564100 0.97732800 -1.85721700

C 0.36117900 0.73336400 -1.99310900

C 1.22805300 1.80215800 -2.25062800

C 0.74658200 3.09947000 -2.37246200

H -1.00979900 4.35288500 -2.33345400

H -2.55390300 2.46656000 -1.86644500

H 2.29110400 1.58477600 -2.35333100

H 1.43330300 3.91939900 -2.57211700

C 0.17796300 -1.52785800 -1.52653200

C -1.25799200 -1.45241600 -1.37665300

H 0.64403100 -2.50519600 -1.40165500

N 0.94306800 -0.54256200 -1.85218200

C -1.93728400 -2.54199900 -1.02267900

F -1.42274300 -3.72787500 -0.80139700

F -3.23980800 -2.57134400 -0.88540500

C -1.96806300 -0.13826000 -1.53261900

H -2.48912400 0.11659900 -0.59306900

H -2.74639500 -0.20197000 -2.30836600

Cs 2.95627100 -0.33560000 0.65819900

F 0.49298600 -1.83428000 1.04064200

**Int9** (G = -1388.604779)

S -2.02116800 1.18313900 2.27841400

O -2.95801500 1.42285100 1.11305900

C -1.78208700 2.81074700 3.03589800

H -2.74994600 3.14162600 3.42363300

H -1.06289800 2.73780400 3.85840600

H -1.42766200 3.51389400 2.27336700

C -0.33823000 1.03922900 1.62615300

H 0.35764500 1.25025600 2.44790700

H -0.17061400 0.01000100 1.26475000

H -0.21873700 1.78742700 0.83081800

C -0.61969300 3.34157900 -2.24006000

C -1.48616500 2.28230300 -1.98487100

C -1.01564100 0.97732800 -1.85721700

C 0.36117900 0.73336400 -1.99310900

C 1.22805300 1.80215800 -2.25062800

C 0.74658200 3.09947000 -2.37246200

H -1.00979900 4.35288500 -2.33345400

H -2.55390300 2.46656000 -1.86644500

H 2.29110400 1.58477600 -2.35333100

H 1.43330300 3.91939900 -2.57211700

C 0.17796300 -1.52785800 -1.52653200

C -1.25799200 -1.45241600 -1.37665300

H 0.64403100 -2.50519600 -1.40165500

N 0.94306800 -0.54256200 -1.85218200

C -1.93728400 -2.54199900 -1.02267900

F -1.42274300 -3.72787500 -0.80139700

F -3.23980800 -2.57134400 -0.88540500

C -1.96806300 -0.13826000 -1.53261900

H -2.48912400 0.11659900 -0.59306900

H -2.74639500 -0.20197000 -2.30836600

O -1.95557600 -1.98970100 1.68382200

H -0.97896300 -1.96010700 1.44761800

H -1.99266800 -1.70580800 2.60072400

Cs 2.95627100 -0.33560000 0.65819900

F 0.49298600 -1.83428000 1.04064200

**TS4** (G = -1388.594934; *v* = -470.09)

S 2.18793200 1.03416800 -2.32021000

O 3.19669200 0.82273800 -1.21406900

C 2.11934900 2.82610300 -2.57596100

H 3.09574800 3.14707500 -2.95000500

H 1.34443700 3.07214200 -3.30918700

H 1.91174500 3.31029900 -1.61390600

C 0.51613800 0.90881800 -1.63147000

H -0.17595400 1.28897400 -2.39327500

H 0.27950000 -0.14113900 -1.41694300

H 0.45571300 1.52120200 -0.72221800

C 1.15647200 3.29330100 1.93595400

C 1.83758300 2.09441800 1.73726800

C 1.17750900 0.86759300 1.76034100

C -0.21511000 0.84155400 1.97228600

C -0.89244400 2.05322800 2.17368900

C -0.21917200 3.26869100 2.15862200

H 1.69567700 4.23819400 1.91613500

H 2.90963800 2.10208000 1.53867500

H -1.96906200 2.01275800 2.34073600

H -0.76689700 4.19565700 2.31779400

C -0.37340700 -1.42669000 1.58562800

C 1.01334900 -1.57196300 1.34941300

H -0.99899300 -2.31652500 1.47249500

N -0.99066900 -0.32936400 1.93364700

C 1.47640200 -2.71772400 0.76116400

F 0.76414000 -3.83008200 0.74399100

F 2.76505900 -3.00070900 0.77895100

C 1.94745500 -0.40403600 1.51716900

H 2.56372400 -0.26467500 0.61315500

H 2.65483000 -0.57347600 2.34766300

O 1.44120200 -2.45403100 -1.19374500

H 0.29943600 -2.24550700 -1.25471600

H 1.62245400 -3.31568000 -1.58921700

Cs -2.93954600 0.03028400 -0.61083100

F -0.82776200 -1.95671800 -1.22469100

**Int10** (G = -1288.225370)

S -0.63029300 1.60160300 1.33867800

O 0.82302600 1.13240300 1.50866200

C -0.78356100 2.14480500 -0.37152400

H -0.64429900 1.27143700 -1.02057100

H -1.79260100 2.54808100 -0.51679700

H -0.03130000 2.91516300 -0.57718300

C -0.66556700 3.23826100 2.09029300

H -1.63275200 3.70699100 1.88200100

H -0.54049800 3.11480200 3.16932600

H 0.15299100 3.83853600 1.67884000

C -4.81028200 0.42089200 -0.04172600

C -3.85027700 -0.30292000 0.66320700

C -2.70725500 -0.81168000 0.05045700

C -2.47784000 -0.56118800 -1.33020800

C -3.47222600 0.15714500 -2.03188600

C -4.61451400 0.63543300 -1.40784300

H -5.69618500 0.80244800 0.46181100

H -3.98960700 -0.48789100 1.73088100

H -3.29908400 0.34488400 -3.09226700

H -5.35279600 1.19038200 -1.98576100

C -0.34728600 -1.41175500 -1.22123400

C -0.40317300 -1.68448000 0.11996400

H 0.60384200 -1.58429300 -1.73697300

N -1.32699600 -0.90946100 -2.00328100

C 0.75196500 -2.18738200 0.88963600

F 1.87543700 -2.29853600 0.07494200

F 0.54601900 -3.48186700 1.31986800

C -1.72505000 -1.64424200 0.83957800

H -1.61982100 -1.23198100 1.85878500

H -2.12361600 -2.66796200 0.99663000

O 1.08665800 -1.49570200 1.99920100

H 0.92556300 -0.53011500 1.84282600

Cs 2.87224800 0.62695900 -0.76719900

**TS5** (G = -1288.189597; *v* = -76.22)

S 0.54695400 2.59973700 0.89098800

O 1.47174900 1.37982100 0.72375600

C 0.18796900 3.16954200 -0.77777000

H -0.53783600 2.47871500 -1.22285500

H -0.24818600 4.17214000 -0.71768700

H 1.12181000 3.18835000 -1.35010000

C 1.65588100 3.93468500 1.36185300

H 1.09153800 4.87154300 1.40162400

H 2.05579000 3.70146700 2.35212200

H 2.46591100 3.99866600 0.62762500

C -6.01487200 -0.24216200 -0.12662400

C -5.02085700 -1.09258700 0.35298800

C -3.67898300 -0.88155100 0.04886200

C -3.32316200 0.21747700 -0.75848900

C -4.32767200 1.06537600 -1.23860100

C -5.66338300 0.84232300 -0.92698800

H -7.05747600 -0.42694700 0.12322300

H -5.28891500 -1.94383100 0.97975600

H -4.02943000 1.90795600 -1.86106300

H -6.42959100 1.51434800 -1.30835900

C -1.06848200 -0.11002800 -0.44273900

C -1.28290200 -1.11864800 0.54321600

H -0.02805500 0.09766500 -0.70651000

N -1.99412100 0.51216900 -1.11060700

C -0.21817700 -1.57016300 1.25965500

F 1.02042100 -2.11193300 -0.94222000

F -0.34295800 -2.71981000 1.91198900

C -2.60890700 -1.82764900 0.53290300

H -2.87144900 -2.21017900 1.52790700

H -2.57949900 -2.71349000 -0.12771700

O 0.89867900 -0.99312500 1.58404300

H 0.97952300 -0.04927600 1.24377300

Cs 3.44880200 -0.68537600 -0.61096700

**Int11** (G = -1288.197661)

S 0.60688900 0.18950600 2.04190300

O 2.11913100 0.03947200 2.00807200

C 0.20310900 0.79332000 3.69664700

H 0.59864400 1.80800200 3.79691900

H -0.88487900 0.80869700 3.82098600

H 0.66565200 0.13530000 4.44099400

C -0.07499300 -1.46302100 2.22864000

H -1.15725400 -1.39095100 2.38872000

H 0.15898700 -1.94932000 1.26176900

H 0.40745600 -1.95399000 3.08269600

C -3.50213400 -2.65879100 -0.28911600

C -2.36638700 -1.92585200 -0.62872000

C -2.44014900 -0.54282700 -0.77796700

C -3.65717400 0.11808500 -0.54577200

C -4.79299500 -0.62658200 -0.21270300

C -4.71996500 -2.00957100 -0.09121000

H -3.43710800 -3.73927700 -0.17387700

H -1.37599600 -2.37765500 -0.74210400

H -5.72628800 -0.09298400 -0.03909900

H -5.60941400 -2.57929900 0.17032800

C -2.69990300 2.21678200 -0.64832800

C -1.36409700 1.67770200 -0.77920900

H -2.83072500 3.30624300 -0.61424800

N -3.78432800 1.52049000 -0.59103100

C -0.28219300 2.45583800 -0.58659300

F 0.64679300 -2.02535100 -0.51948000

F 0.93461400 1.97361400 -0.79511300

C -1.23548900 0.24419400 -1.21141100

H -0.33400500 -0.27243300 -0.84011300

H -1.16911900 0.20261600 -2.31348300

O -0.17812500 3.71969000 -0.20506000

H -1.03983100 4.06734100 0.07451700

Cs 3.09722700 -0.52602100 -0.84301000

**TS6** (G = -1288.168896; *v* = -11.39)

S 5.37145000 0.53400000 0.63112800

O 4.30677200 0.24932900 -0.40917300

C 6.66757100 1.47231100 -0.20640500

H 6.25655300 2.45097200 -0.46923200

H 7.51874000 1.60004900 0.47040300

H 6.97001900 0.93578200 -1.11261800

C 6.32972500 -0.98566800 0.81897700

H 7.18997500 -0.79507000 1.46896200

H 5.68117500 -1.73654400 1.27892600

H 6.65837700 -1.32754300 -0.16884600

C -4.97015700 -2.60912600 0.40645100

C -3.78244700 -1.88243400 0.40597000

C -3.77932400 -0.50788100 0.18610600

C -5.00017000 0.15014900 -0.03448600

C -6.19048400 -0.58488300 -0.03418100

C -6.18062700 -1.95625200 0.18414700

H -4.94924000 -3.68262800 0.58079700

H -2.83288500 -2.38972600 0.58059300

H -7.12130000 -0.04743100 -0.20737300

H -7.11379400 -2.51510900 0.18263900

C -4.02973100 2.24399100 -0.16079600

C -2.70599900 1.74268800 0.11190000

H -4.15757100 3.32185400 -0.32038200

N -5.10292300 1.53702500 -0.25230700

C -1.66689900 2.58708600 0.27368100

F 1.38761300 -3.29702700 0.61909800

F -0.45336200 2.09873000 0.47239800

C -2.48182000 0.25333800 0.16045400

H -1.87724200 -0.02276700 1.03602200

H -1.89459900 -0.06864600 -0.71479700

O -1.60478300 3.90697900 0.27498500

H -2.48982800 4.29990700 0.20784800

Cs 1.43012500 -0.75149100 -0.59210400

**Int12** (G = -1288.250092)

S 0.59173600 2.24414000 0.86581000

O 1.79271300 1.44052400 1.33153600

C 0.78116900 2.45829900 -0.91819800

H 0.69435700 1.46293200 -1.36665700

H -0.01415900 3.11043200 -1.29525000

H 1.76602100 2.89229600 -1.12842800

C 0.92920200 3.96226600 1.31100400

H 0.15945600 4.60935600 0.87783500

H 0.90237600 4.03782800 2.40152900

H 1.92197200 4.23791100 0.93848600

C -5.56156000 1.23055400 -0.99874200

C -4.19862000 1.11939600 -1.12197100

C -3.50412200 0.07178200 -0.47112700

C -4.23244900 -0.86888000 0.31032400

C -5.63703700 -0.73059600 0.41769000

C -6.28551500 0.29694100 -0.22258500

H -6.09108400 2.03837500 -1.49867800

H -3.62948000 1.83240500 -1.71737400

H -6.17648200 -1.45987800 1.01901300

H -7.36513900 0.39713900 -0.13481500

C -2.31503600 -2.00722000 0.84250200

C -1.49198600 -1.12780300 0.09664000

H -1.83361500 -2.84139400 1.35584500

N -3.62030400 -1.90092400 0.95778400

C -0.00136600 -1.35635600 0.10570700

F 2.38816300 -2.44859100 1.26861300

F 0.48533700 -0.73470600 -1.14035500

C -2.10280200 -0.08830300 -0.55908100

H -1.52585000 0.61492900 -1.15922800

H 0.49205000 -0.70593400 0.86357400

O 0.35159400 -2.61522900 0.17829600

H 1.42302300 -2.60953000 0.74143400

Cs 3.52464900 -0.36236000 -0.48074000

**TS7** (G = -1288.240976; *v* = -31.24)

S 0.70587700 -2.33329300 0.89928400

O -0.57976600 -1.67014800 1.35516200

C 0.39071100 -2.94770700 -0.77156200

H 0.24023700 -2.08183500 -1.42448200

H 1.25347400 -3.52471800 -1.12134200

H -0.50972900 -3.57327000 -0.76114600

C 0.75520400 -3.95847400 1.68738100

H 1.59999800 -4.52909800 1.28746000

H 0.89140000 -3.80637500 2.76171500

H -0.18948800 -4.48037900 1.49853600

C 4.39558600 -0.85427800 -1.27006100

C 3.06005800 -0.55234400 -1.37321800

C 2.50912400 0.52210700 -0.63347700

C 3.35617700 1.29455400 0.21066800

C 4.72961500 0.96122700 0.29494900

C 5.23605900 -0.09112500 -0.42745000

H 4.81411000 -1.68158800 -1.83870500

H 2.40398100 -1.12988400 -2.02451000

H 5.36054600 1.56286700 0.94646700

H 6.29208900 -0.34203000 -0.35568100

C 1.60722200 2.63117900 0.85244800

C 0.67300500 1.92192700 0.05980700

H 1.24080900 3.48044700 1.43217400

N 2.88822600 2.34656900 0.94084000

C -0.78195900 2.31420600 0.12273300

F -3.22530400 3.36784800 0.99702100

F -1.35917100 1.83100100 -1.14449800

C 1.13918000 0.86592300 -0.68201100

H 0.46350700 0.29069400 -1.31563800

H -1.30777200 1.65194200 0.85433600

O -1.00827600 3.58329400 0.30168600

H -2.23055300 3.56449000 0.68974700

Cs -2.91435500 -0.71331900 -0.39912900

**56** (G = -514.804305)

C 4.43012600 -0.34437700 -2.14513600

C 3.16828800 0.15294200 -1.92885300

C 2.78165900 0.57737500 -0.63571200

C 3.70430300 0.47450900 0.44517300

C 4.99673700 -0.03658700 0.19153300

C 5.34920800 -0.43541800 -1.07637700

H 4.72765100 -0.67053100 -3.13884700

H 2.44369300 0.22870300 -2.73913900

H 5.69243000 -0.10600700 1.02519300

H 6.34605300 -0.82914500 -1.26204800

C 2.17708300 1.30941800 1.93937200

C 1.18684400 1.44952200 0.93335500

H 1.92362100 1.60054100 2.96078600

N 3.38420500 0.84642300 1.72261900

C -0.16418100 1.93285800 1.25061300

C 1.49383900 1.08228000 -0.35710000

H 0.73315100 1.14752200 -1.14448400

H -0.85051900 1.96812300 0.37498300

O -0.51606700 2.30099300 2.35606900

**Investigations into the origin of chemoselectivity between CF3- and CF2CF3-substituted N-triftosylhydrazones:**

**TS4'** (G = -1312.187041; *v* = -9.60)

S 5.32315400 0.58516300 0.68353300

O 4.27285300 0.28014300 -0.36555800

C 6.61018100 1.54412200 -0.14463900

H 6.18469900 2.51492200 -0.41350200

H 7.45287400 1.68832700 0.53942700

H 6.93000300 1.01091100 -1.04683500

C 6.30592000 -0.91746100 0.88211500

H 7.15710900 -0.71157400 1.53928200

H 5.66634500 -1.67884200 1.33732200

H 6.64907400 -1.25473500 -0.10233500

C -5.01880300 -2.56821000 0.32682600

C -3.81366900 -1.87157200 0.31348200

C -3.78607100 -0.48550700 0.18768100

C -4.99891700 0.21250300 0.07534000

C -6.20687900 -0.49220800 0.08885800

C -6.22194100 -1.87487800 0.21347800

H -5.01718700 -3.65136300 0.42652600

H -2.87027300 -2.41117700 0.40298000

H -7.13010200 0.07767700 0.00046400

H -7.16788100 -2.41148300 0.22308200

C -3.99000700 2.29475200 -0.02693500

C -2.65794200 1.73623700 0.10244400

H -4.07389500 3.38129400 -0.11226800

N -5.07931500 1.61346400 -0.04826000

C -1.60516400 2.55382100 0.14987800

F 1.39864000 -3.36580500 0.60737300

F -0.36590600 2.13460900 0.26217400

C -2.47183400 0.24524600 0.15961700

H -1.87358300 -0.03510800 1.03883200

H -1.88956200 -0.09197300 -0.71146300

Cs 1.43338700 -0.82291800 -0.60793800

F -1.64620300 3.86170400 0.09400500

**26** (G = -639.235511)

C 4.04453300 -1.93747300 -1.43109200

C 2.82876200 -1.32084800 -1.26158400

C 2.76089200 -0.08820200 -0.56952200

C 3.93826500 0.50346000 -0.03808800

C 5.17523100 -0.15436600 -0.23302800

C 5.22222500 -1.34670800 -0.91655500

H 4.11094100 -2.88573800 -1.96034000

H 1.87860700 -1.72539600 -1.62028600

H 6.07376300 0.30620800 0.17334500

H 6.17714500 -1.84762700 -1.06210700

C 2.73659000 2.25343600 0.82906700

C 1.50920300 1.74176200 0.33620100

H 2.72710600 3.19118200 1.39165200

N 3.90566900 1.67958200 0.65617600

C 0.24122900 2.49113500 0.62442400

F -0.81668300 1.80860300 0.02832500

C 1.52590500 0.57086400 -0.37716100

H 0.63588000 0.08970300 -0.81150000

H 0.01839400 2.52461800 1.70045500

F 0.26460725 3.77138254 0.19673287

**Int8-1** (G = -1549.898431)

S -2.02116800 1.18313900 2.27841400

O -2.95801500 1.42285100 1.11305900

C -1.78208700 2.81074700 3.03589800

H -2.74994600 3.14162600 3.42363300

H -1.06289800 2.73780400 3.85840600

H -1.42766200 3.51389400 2.27336700

C -0.33823000 1.03922900 1.62615300

H 0.35764500 1.25025600 2.44790700

H -0.17061400 0.01000100 1.26475000

H -0.21873700 1.78742700 0.83081800

C -0.61969300 3.34157900 -2.24006000

C -1.48616500 2.28230300 -1.98487100

C -1.01564100 0.97732800 -1.85721700

C 0.36117900 0.73336400 -1.99310900

C 1.22805300 1.80215800 -2.25062800

C 0.74658200 3.09947000 -2.37246200

H -1.00979900 4.35288500 -2.33345400

H -2.55390300 2.46656000 -1.86644500

H 2.29110400 1.58477600 -2.35333100

H 1.43330300 3.91939900 -2.57211700

C 0.17796300 -1.52785800 -1.52653200

C -1.25799200 -1.45241600 -1.37665300

H 0.64403100 -2.50519600 -1.40165500

N 0.94306800 -0.54256200 -1.85218200

C -1.93728400 -2.54199900 -1.02267900

F -3.23980800 -2.57134400 -0.88540500

C -1.96806300 -0.13826000 -1.53261900

H -2.48912400 0.11659900 -0.59306900

H -2.74639500 -0.20197000 -2.30836600

Cs 2.95627100 -0.33560000 0.65819900

F 0.49298600 -1.83428000 1.04064200

C -1.33309342 -3.93449272 -0.76284256

F -2.24002896 -4.88413235 -1.07613555

F -0.23070866 -4.09609319 -1.52516345

F -0.99889531 -4.04394469 0.54054989

**TS4-1** (G = -1626.297227; *v* = -422.39)

S 1.34450100 -2.64254900 -2.06638600

O 0.73959500 -3.47120300 -0.95488300

C 3.12161400 -2.98774700 -2.02787000

H 3.26399000 -4.03936800 -2.29227000

H 3.64110100 -2.35245900 -2.75265800

H 3.49501900 -2.80422500 -1.01307400

C 1.50189700 -0.92856800 -1.49976500

H 2.11767100 -0.39754000 -2.23636500

H 0.51027900 -0.46085100 -1.45441900

H 1.98840900 -0.92098000 -0.51583800

C 3.08630400 -1.69828700 2.37647600

C 1.80652400 -2.10948300 2.01111700

C 0.76728500 -1.19517000 1.85117900

C 1.02168700 0.17456900 2.04785700

C 2.31262200 0.58059400 2.41600200

C 3.33778100 -0.34263500 2.58201500

H 3.88198100 -2.43069200 2.49720000

H 1.60457800 -3.16283700 1.81640600

H 2.48876100 1.64568500 2.56808600

H 4.33187800 -0.00546400 2.86934100

C -1.08774400 0.81103100 1.34755100

C -1.50577000 -0.51881600 1.08602400

H -1.78438000 1.62398200 1.12983000

N 0.06387100 1.18066400 1.83973300

C -2.64398600 -0.79461100 0.36997700

F -3.09887800 -2.05447100 0.41231400

C -0.59677500 -1.67073600 1.43354600

H -0.47812300 -2.34629100 0.57022600

H -1.03550500 -2.28779800 2.23670500

O -2.16919800 -0.86056200 -1.51375100

H -1.56188800 0.19188900 -1.62156400

H -2.94729200 -0.89238200 -2.08471400

Cs 1.38500100 2.67378600 -0.69928600

F -0.94435800 1.10835100 -1.63616200

C -3.81777200 0.14929900 0.20461100

F -4.37963700 0.39822400 1.39642800

F -3.48611700 1.32327000 -0.32935500

F -4.76165800 -0.39374100 -0.56715800

**TS4-1'** (G = -1549.892973; *v* = -33.71)

S 5.55060600 0.39930900 0.62271700

O 4.56977800 -0.12107100 -0.40867000

C 6.73983000 1.42169000 -0.27302300

H 6.21171000 2.30584800 -0.64044600

H 7.54156400 1.72822500 0.40681900

H 7.14344500 0.84808800 -1.11486700

C 6.69426000 -0.95319000 0.97751100

H 7.49608800 -0.58951000 1.62870900

H 6.13422500 -1.74065600 1.48950200

H 7.10292300 -1.33524400 0.03533200

C -4.66984800 -3.39732100 0.53412400

C -3.51134000 -2.62522800 0.53341900

C -3.56004800 -1.26860200 0.22877300

C -4.79637100 -0.68298500 -0.08097200

C -5.95748400 -1.46209000 -0.08112600

C -5.89794300 -2.81432500 0.22646000

H -4.61319600 -4.45602000 0.77695800

H -2.55036000 -3.07920500 0.77573800

H -6.90043400 -0.97643400 -0.32498600

H -6.80496800 -3.41413300 0.22665000

C -3.91848900 1.45541000 -0.31473600

C -2.57666900 1.02705700 0.06870700

H -4.08013600 2.50837500 -0.55404700

N -4.93736400 0.67924100 -0.39670200

C -1.59446300 1.91371700 0.26606300

F 1.62206500 -3.63291700 0.58444400

F -0.36925300 1.49770300 0.59739800

C -2.30824300 -0.44312600 0.20067700

H -1.70014800 -0.64069900 1.09385600

H -1.68516600 -0.76452300 -0.64991200

Cs 1.69202300 -1.09107600 -0.63637800

C -1.68018400 3.41220300 0.14329200

F -0.55968700 3.98521700 0.56826500

F -1.88020000 3.79205600 -1.12515500

F -2.69528600 3.90691200 0.85941500

**37** (G = -876.942548)

C 4.04453300 -1.93747300 -1.43109200

C 2.82876200 -1.32084800 -1.26158400

C 2.76089200 -0.08820200 -0.56952200

C 3.93826500 0.50346000 -0.03808800

C 5.17523100 -0.15436600 -0.23302800

C 5.22222500 -1.34670800 -0.91655500

H 4.11094100 -2.88573800 -1.96034000

H 1.87860700 -1.72539600 -1.62028600

H 6.07376300 0.30620800 0.17334500

H 6.17714500 -1.84762700 -1.06210700

C 2.73659000 2.25343600 0.82906700

C 1.50920300 1.74176200 0.33620100

H 2.72710600 3.19118200 1.39165200

N 3.90566900 1.67958200 0.65617600

C 0.24122900 2.49113500 0.62442400

F -0.81668300 1.80860300 0.02832500

C 1.52590500 0.57086400 -0.37716100

H 0.63588000 0.08970300 -0.81150000

H 0.01839400 2.52461800 1.70045500

C 0.26789752 3.95156552 0.13653930

F -0.97843879 4.46738134 0.19203569

F 1.08985435 4.67489825 0.92627137

F 0.71565526 3.99266396 -1.13638015

**Int10-1** (G = -1525.904751)

S -3.04387700 2.18234000 -1.65971600

O -2.52093500 3.02872000 -0.51929000

C -4.61604700 1.46900500 -1.11534800

H -5.32150600 2.29131300 -0.96631600

H -4.99537700 0.79693300 -1.89245700

H -4.46516200 0.92549000 -0.17480800

C -2.13100900 0.61695500 -1.65479700

H -2.57000600 -0.04162200 -2.41318500

H -1.08703300 0.82497000 -1.91172000

H -2.19612400 0.16218700 -0.65727600

C -3.53000000 -0.20956600 2.26410400

C -2.52637200 0.68927100 1.90538200

C -1.18966200 0.30307000 1.81558800

C -0.82921800 -1.04171600 2.08079600

C -1.86007800 -1.94072700 2.42669600

C -3.18392900 -1.53595900 2.52577500

H -4.56533300 0.11981600 2.33439300

H -2.77897600 1.72020100 1.64787100

H -1.57887400 -2.97572400 2.62491500

H -3.95009300 -2.25811900 2.80477600

C 1.36315500 -0.67726300 1.48234000

C 1.15685800 0.62824800 1.09210000

H 2.35324300 -1.11999500 1.33571700

N 0.45964800 -1.53710400 1.97578800

C 2.21097300 1.49014600 0.55751500

F 2.58352300 2.50554800 1.44905900

C -0.13687400 1.32147200 1.44857700

H -0.51755700 1.95024300 0.62597600

H 0.01667000 2.02609700 2.29067000

O 1.75523900 2.16502900 -0.59403500

H 2.40345200 2.84739900 -0.83931900

Cs 0.17948900 -2.35567700 -1.17835700

C 3.54915900 0.83280600 0.19302300

F 4.17822500 0.32664200 1.25017500

F 3.37922200 -0.13777000 -0.70891700

F 4.36034200 1.74765500 -0.35504500
